# Supplementary material for: Prediction of human missense variant effects from functional evidence
Source: Research Square preprint supplement (doi:10.21203/rs.3.rs-7536763/v1), 2025-10-03
Supplement: Supplementary file 2 [file b215d09009ad272824da63ee.xlsx]

## Sheet: Supplementary Table 1
#Supplementary Table 1. Functional and clinical datasets.
ID	Gene	weight	functional_label	clinical_label	FuncVEP	ClinVEP
10-100233333-T-A	CWF19L1	1		B	-	-
10-100262050-C-G	CWF19L1	1		P	-	+
10-100989312-G-A	TWNK	1		B	-	+
10-100989331-G-A	TWNK	1	PS3		+	-
10-100989833-T-G	TWNK	1		P	-	+
10-101010757-T-C	PDZD7	1		B	-	+
10-101023988-C-G	PDZD7	1		P	-	+
10-101771551-G-A	FGF8	1	PS3		+	-
10-102065872-C-T	HPS6	1		B	-	+
10-102066253-G-A	HPS6	1		P	-	+
10-102830910-C-T	CYP17A1	1	PS3		+	-
10-102831525-G-A	CYP17A1	1		P	-	+
10-102832533-G-T	CYP17A1	1	PS3		-	-
10-102832611-G-A	CYP17A1	1	PS3		+	-
10-102835374-A-G	CYP17A1	1	PS3		+	-
10-102837076-G-A	CYP17A1	1	PS3		+	-
10-102837330-G-A	CYP17A1	1		B	-	+
10-1080453-A-G	WDR37	1		P	-	+
10-1086292-C-T	WDR37	1		B	-	+
10-110112885-T-C	ADD3	1		B	-	+
10-110122249-G-A	ADD3	1		P	-	+
10-110578658-C-G	SMC3	1		P	-	-
10-110584332-C-T	SMC3	1		B	-	+
10-110644585-C-A	RBM20	1		B	-	+
10-110781097-G-A	RBM20	1		B	-	+
10-110781781-T-C	RBM20	1		B	-	+
10-110812297-C-T	RBM20	1		P	-	-
10-110812298-G-A	RBM20	1	PS3	P	+	+
10-110812303-C-A	RBM20	1	PS3	P	+	+
10-110812303-C-T	RBM20	1	PS3	P	+	+
10-110812304-G-A	RBM20	1		P	-	+
10-110812304-G-T	RBM20	1		P	-	+
10-110812310-C-T	RBM20	1	PS3	P	+	+
10-110812598-G-A	RBM20	1		B	-	+
10-110812628-A-G	RBM20	1		B	-	+
10-110812700-C-T	RBM20	1		B	-	+
10-110821356-G-A	RBM20	1	PS3	P	+	+
10-110823536-G-A	RBM20	1		B	-	+
10-110831132-A-G	RBM20	1		B	-	+
10-110964362-A-G	SHOC2	1	PS3	P	+	+
10-110964368-A-C	SHOC2	1		B	-	-
10-110964396-A-C	SHOC2	1		B	-	+
10-110964877-G-A	SHOC2	1	PS3	P	+	-
10-113876631-G-T	NHLRC2	1	PS3		+	-
10-119651700-A-G	BAG3	1		B	-	+
10-119672372-C-T	BAG3	1		P	-	+
10-119672373-C-T	BAG3	1		P	-	+
12-120737942-C-A	ACADS	0	Proxy Benign		+	-
10-119676692-C-T	BAG3	1		B	-	-
10-119676774-C-T	BAG3	1		B	-	+
10-119676917-G-A	BAG3	1	PS3	P	+	-
10-119676962-C-T	BAG3	1		P	-	+
10-119676977-G-A	BAG3	1		B	-	+
10-12108004-C-T	DHTKD1	1	PS3		+	-
10-121487379-T-C	FGFR2	1	PS3		+	-
10-121488000-C-A	FGFR2	1	PS3		-	-
10-121488000-C-G	FGFR2	1	PS3		+	-
10-121488052-A-T	FGFR2	1	PS3		+	-
10-121488055-T-C	FGFR2	1	PS3		+	-
10-121496701-T-G	FGFR2	1	PS3		+	-
10-121515263-A-C	FGFR2	1	PS3		+	-
10-121517342-G-C	FGFR2	1	PS3		+	-
10-121517378-C-T	FGFR2	1	PS3		+	-
10-121517379-A-C	FGFR2	1	PS3		+	-
10-121517390-C-T	FGFR2	1		P	-	+
10-121517391-C-G	FGFR2	1		P	-	+
10-121520050-A-G	FGFR2	1	PS3	P	+	+
10-121520085-C-A	FGFR2	1	PS3		+	-
10-121520092-A-C	FGFR2	1		P	-	-
10-121520119-A-G	FGFR2	1		P	-	+
10-121520160-G-C	FGFR2	1	PS3		+	-
10-121520163-G-C	FGFR2	1	PS3	P	+	+
10-121551357-A-G	FGFR2	1		B	-	-
10-121565551-A-G	FGFR2	1		B	-	+
10-121565644-G-A	FGFR2	1		B	-	+
10-121593754-G-A	FGFR2	1		B	-	+
10-121593784-C-T	FGFR2	1		B	-	+
10-121593801-C-G	FGFR2	1		B	-	+
10-122461711-C-T	HTRA1	1		B	-	+
10-122461729-G-A	HTRA1	1		B	-	+
10-122461989-G-T	HTRA1	1		B	-	+
10-122488925-C-T	HTRA1	1	PS3	P	+	+
10-122506767-C-T	HTRA1	1		P	-	+
10-122506796-G-A	HTRA1	1	PS3	P	+	+
10-122506818-G-A	HTRA1	1		P	-	+
10-122508744-C-T	HTRA1	1		B	-	-
10-123009067-G-A	ACADSB	1		B	-	+
10-123053091-G-A	ACADSB	1	PS3	P	+	+
10-124397955-A-T	OAT	1	PS3		+	-
10-124398012-G-A	OAT	1	PS3		+	-
10-124398057-A-G	OAT	1	PS3		+	-
10-124400861-T-C	OAT	1		B	-	+
10-124403892-G-A	OAT	1		P	-	+
10-125788926-G-A	UROS	1		B	-	+
10-125788966-C-T	UROS	1		B	-	+
10-125788993-C-T	UROS	1		P	-	-
10-125796152-A-C	UROS	1		B	-	+
10-125815061-A-G	UROS	1	PS3	P	+	+
10-125816490-G-A	UROS	1	PS3		+	-
10-125816493-C-A	UROS	1		P	-	+
10-129877779-G-A	EBF3	1	PS3		+	-
10-129877825-C-A	EBF3	1	PS3		+	-
10-129957282-G-A	EBF3	1	PS3		-	-
10-129957324-C-T	EBF3	1	PS3		+	-
10-129958965-G-C	EBF3	1	PS3		+	-
10-129958991-C-T	EBF3	1		P	-	+
10-129963672-T-C	EBF3	1		B	-	+
10-13278338-C-T	PHYH	1		B	-	+
10-132785372-G-C	NKX6-2	1		P	-	+
10-132785885-T-G	NKX6-2	1		B	-	+
10-13281109-G-T	PHYH	1		P	-	+
10-13283694-C-T	PHYH	1		P	-	+
10-13283695-G-A	PHYH	1	PS3	P	+	+
10-13288395-C-T	PHYH	1		B	-	+
10-13298236-G-A	PHYH	1		B	-	+
10-133370622-G-A	ECHS1	1		B	-	+
10-133370649-A-G	ECHS1	1		P	-	-
10-133370670-T-C	ECHS1	1	PS3		+	-
10-133370685-C-T	ECHS1	1		P	-	+
10-133373302-A-G	ECHS1	1		B	-	+
10-133373329-G-A	ECHS1	1	PS3		-	-
10-14908593-C-T	DCLRE1C	1		B	-	+
10-14909153-C-T	DCLRE1C	1		B	-	+
10-14909203-T-G	DCLRE1C	1		B	-	+
10-14934486-C-T	DCLRE1C	1		B	-	+
12-120737974-G-A	ACADS	3.55e-07	Proxy Benign		+	-
10-14935508-G-A	DCLRE1C	1		B	-	+
10-14935521-C-T	DCLRE1C	1	PS3	P	+	+
10-14936554-A-G	DCLRE1C	1	PS3	P	+	-
10-14945124-C-G	DCLRE1C	1		B	-	+
10-14945157-G-A	DCLRE1C	1		P	-	+
10-14945182-C-A	DCLRE1C	1		B	-	+
10-14953908-G-C	DCLRE1C	1	PS3	P	+	-
10-14953916-G-A	DCLRE1C	1		P	-	+
10-14953916-G-C	DCLRE1C	1		P	-	-
10-14953929-C-G	DCLRE1C	1		P	-	+
10-14953964-A-G	DCLRE1C	1		P	-	+
10-16900756-A-G	CUBN	1		B	-	+
10-17110924-G-A	CUBN	1		P	-	+
10-180088-C-T	ZMYND11	1		P	-	+
10-23192916-C-T	PTF1A	1		B	-	-
10-23193101-C-A	PTF1A	1		P	-	+
10-237638-G-T	ZMYND11	1		B	-	+
10-240949-C-A	ZMYND11	1		B	-	+
10-242115-G-A	ZMYND11	1		P	-	+
10-248582-C-T	ZMYND11	1		B	-	+
10-252459-C-T	ZMYND11	1		P	-	+
10-26125584-T-G	MYO3A	1	PS3	P	+	+
10-26157383-G-A	MYO3A	1		B	-	+
13-20189117-A-T	GJB2	5.92e-07	Proxy Benign		+	-
10-27860663-C-T	ODAD2	1		B	-	+
10-27862453-A-C	ODAD2	1		P	-	+
10-43100585-G-A	RET	1		B	-	+
10-43102345-G-A	RET	1		B	-	-
10-43102628-G-C	RET	1		B	-	+
10-43102628-G-T	RET	1		B	-	+
10-43105159-C-A	RET	1		B	-	+
10-43109085-C-T	RET	1		B	-	+
10-43111279-G-C	RET	1		B	-	+
10-43111408-G-A	RET	1		B	-	+
10-43112173-G-T	RET	1	PS3		+	-
10-43113621-T-C	RET	1		P	-	+
10-43113622-G-A	RET	1	PS3	P	+	+
10-43113623-C-G	RET	1	PS3		+	-
10-43113627-T-G	RET	1		P	-	+
10-43113648-T-C	RET	1	PS3	P	-	+
10-43113648-T-G	RET	1	PS3		+	-
10-43113649-G-A	RET	1	PS3		-	-
10-43113654-T-C	RET	1	PS3		+	-
10-43113654-T-G	RET	1		P	-	+
10-43113655-G-A	RET	1	PS3		+	-
10-43114488-T-C	RET	1		P	-	+
10-43114489-G-A	RET	1		P	-	+
10-43114491-G-T	RET	1		P	-	+
10-43114500-T-A	RET	1	PS3	P	+	+
10-43114500-T-C	RET	1	PS3		+	-
10-43114501-G-A	RET	1	PS3		+	-
10-43114502-C-G	RET	1	PS3		+	-
10-43114596-A-G	RET	1	PS3		+	-
10-43114598-G-T	RET	1	PS3		+	-
10-43116693-G-C	RET	1		B	-	-
10-43118392-G-C	RET	1	PS3		+	-
10-43118392-G-T	RET	1	PS3	P	+	+
10-43118458-G-T	RET	1	PS3		+	-
10-43118460-A-T	RET	1		B	-	+
10-43119548-G-A	RET	1	PS3	P	+	+
10-43119548-G-C	RET	1	PS3		-	-
10-43119548-G-T	RET	1	PS3		+	-
10-43119692-A-G	RET	1		B	-	+
10-43120090-C-T	RET	1		P	-	+
10-43120144-T-G	RET	1	PS3		+	-
10-43120184-C-T	RET	1	PS3		+	-
10-43121967-A-G	RET	1	PS3		+	-
10-43121968-T-C	RET	1	PS3		+	-
10-43126677-C-T	RET	1		B	-	+
10-47322997-G-A	GDF2	1		P	-	+
10-47325395-G-A	GDF2	1		B	-	+
10-47629-C-T	TUBB8	1	PS3		+	-
10-49458975-G-A	ERCC6	1		B	-	+
10-49459059-T-C	ERCC6	1		B	-	+
7-155812040-C-A	SHH	9.46e-07	Proxy Benign		+	-
10-49461413-C-G	ERCC6	1		B	-	+
10-49470323-T-C	ERCC6	1		B	-	+
10-49472938-G-T	ERCC6	1		P	-	+
10-49474074-A-G	ERCC6	1	PS3	P	+	-
10-49474074-A-T	ERCC6	1		P	-	+
10-49482848-G-A	ERCC6	1		P	-	+
10-49614330-C-G	CHAT	1		B	-	+
10-49616573-G-A	CHAT	1		B	-	+
10-49619743-G-A	CHAT	1	PS3	P	+	+
10-49620534-C-G	CHAT	1		P	-	+
10-49620535-G-A	CHAT	1	PS3	P	+	+
10-49620546-C-G	CHAT	1		P	-	+
10-49622109-C-G	CHAT	1		B	-	+
10-49622125-C-T	CHAT	1		B	-	+
10-49622143-C-G	CHAT	1		B	-	+
10-49625616-C-T	CHAT	1		B	-	+
10-49627681-T-C	CHAT	1		P	-	+
10-49627735-C-T	CHAT	1		P	-	+
10-49646528-G-C	CHAT	1		B	-	+
10-49646591-G-A	CHAT	1		B	-	+
10-49646651-C-T	CHAT	1		P	-	+
10-49648597-C-T	CHAT	1		B	-	+
10-49648606-G-A	CHAT	1		B	-	+
10-49649569-A-G	CHAT	1		P	-	+
10-49655129-G-A	CHAT	1	PS3	P	+	+
10-49655142-G-A	CHAT	1		B	-	+
10-49655175-C-G	CHAT	1		P	-	+
10-49664880-C-G	CHAT	1		P	-	+
10-51074787-G-T	PRKG1	1		B	-	+
10-51467819-G-A	PRKG1	1	PS3	P	+	+
10-54183451-A-T	PCDH15	1		P	-	+
10-54185214-C-T	PCDH15	1		B	-	-
10-54195850-C-T	PCDH15	1		B	-	+
10-54369194-G-C	PCDH15	1		P	-	+
10-62813286-C-A	EGR2	1		B	-	-
10-62813406-T-C	EGR2	1	PS3		+	-
10-62813412-C-T	EGR2	1		P	-	+
10-62813413-G-A	EGR2	1	PS3		+	-
10-62813496-C-T	EGR2	1	PS3		+	-
10-62813563-G-A	EGR2	1	PS3		-	-
10-68419877-G-T	DNA2	1		B	-	+
10-68431926-G-A	DNA2	1		P	-	+
10-69572448-A-G	NEUROG3	1		B	-	+
10-69572545-C-T	NEUROG3	1		B	-	+
10-69572725-G-T	NEUROG3	1		P	-	+
10-69572766-C-A	NEUROG3	1		P	-	+
10-70435353-C-T	NODAL	1	PS3	P	+	+
10-70435570-C-T	NODAL	1		B	-	+
8-140535538-G-A	AGO2	1.06e-06	Proxy Benign		+	-
10-70598250-C-T	PRF1	1		P	-	+
10-70598364-C-T	PRF1	1		B	-	+
10-70598493-G-A	PRF1	1	PS3		+	-
10-70598538-A-G	PRF1	1	PS3		+	-
10-70598805-C-A	PRF1	1		P	-	+
10-70599048-G-A	PRF1	1	PS3		+	-
10-70600458-C-T	PRF1	1	PS3		+	-
10-70600500-C-T	PRF1	1		B	-	+
10-70600517-C-G	PRF1	1		P	-	+
10-70600755-C-T	PRF1	1	PS3		+	-
10-70600787-G-T	PRF1	1	PS3		+	-
10-70600892-C-T	PRF1	1		B	-	+
10-70868394-G-A	SGPL1	1		P	-	+
10-70877321-C-T	SGPL1	1		B	-	+
10-71322806-A-G	SLC29A3	1		B	-	+
10-71322828-G-A	SLC29A3	1		B	-	+
10-71356110-G-A	SLC29A3	1		B	-	-
10-71362151-C-T	SLC29A3	1		P	-	+
10-71362156-A-G	SLC29A3	1		B	-	+
10-71362267-C-T	SLC29A3	1		P	-	+
10-71362459-G-A	SLC29A3	1	PS3	P	+	+
10-71362489-G-A	SLC29A3	1	PS3	P	+	+
10-71439838-C-T	CDH23	1		B	-	+
10-71510109-A-G	CDH23	1		B	-	+
10-71511163-A-G	CDH23	1	PS3	P	+	+
10-71570884-C-T	CDH23	1		P	-	+
10-71577965-C-T	CDH23	1		P	-	+
10-71615542-G-A	CDH23	1		P	-	+
10-71617295-C-T	CDH23	1		P	-	+
10-71617296-C-T	CDH23	1		P	-	+
10-71645842-C-A	CDH23	1		P	-	-
10-71646591-G-A	CDH23	1		B	-	+
10-71675131-G-C	CDH23	1		B	-	-
10-71675149-G-A	CDH23	1		B	-	-
10-71694233-C-T	CDH23	1		B	-	-
10-71704929-G-A	CDH23	1		P	-	+
10-71705031-G-A	CDH23	1		B	-	+
10-71705043-G-A	CDH23	1		P	-	+
10-71705044-A-G	CDH23	1		P	-	+
10-71706911-G-A	CDH23	1		P	-	+
10-71706959-G-A	CDH23	1	PS3	P	+	+
10-71709202-G-A	CDH23	1		P	-	+
10-71709206-C-A	CDH23	1		P	-	+
10-71712737-A-G	CDH23	1		B	-	+
10-71712796-G-A	CDH23	1		B	-	+
10-71730553-G-A	CDH23	1		B	-	+
10-71732292-G-A	CDH23	1		P	-	+
10-71732322-A-G	CDH23	1		B	-	+
10-71738598-G-A	CDH23	1		B	-	+
10-71740895-A-G	CDH23	1		P	-	+
10-71777692-G-A	CDH23	1		B	-	+
10-71777857-G-A	CDH23	1		B	-	+
10-71777885-G-A	CDH23	1		B	-	+
10-71778252-G-A	CDH23	1		B	-	+
10-71778268-A-C	CDH23	1		P	-	+
10-71784329-G-A	CDH23	1		B	-	+
10-71784922-A-G	CDH23	1		P	-	+
10-71784972-G-A	CDH23	1		P	-	+
10-71785048-C-T	CDH23	1		B	-	+
10-71785667-G-A	CDH23	1		P	-	+
10-71790360-C-G	CDH23	1		B	-	+
10-71790413-G-A	CDH23	1	PS3	P	-	-
10-71791165-A-C	CDH23	1		P	-	+
10-71791167-C-T	CDH23	1		P	-	+
10-71791212-G-A	CDH23	1		B	-	-
10-71791279-G-A	CDH23	1		B	-	+
16-68813377-C-G	CDH1	1.18e-06	Proxy Benign		+	-
10-71793370-G-A	CDH23	1		P	-	-
10-71793524-T-A	CDH23	1		B	-	+
10-71793532-G-A	CDH23	1		P	-	+
10-71799195-C-T	CDH23	1		B	-	+
10-71799579-G-A	CDH23	1		P	-	+
10-71800736-G-A	CDH23	1		B	-	+
10-71802973-G-A	CDH23	1		P	-	+
10-71803362-A-G	CDH23	1		P	-	+
10-71806223-C-T	CDH23	1		B	-	+
10-71807302-T-C	CDH23	1		P	-	+
10-71807608-T-G	CDH23	1		B	-	+
10-71810506-C-G	CDH23	1		B	-	+
10-71812008-T-C	CDH23	1		B	-	+
10-71819830-T-G	PSAP	1		P	-	+
10-71825892-C-G	PSAP	1		P	-	+
10-71828091-T-G	PSAP	1	PS3		-	-
10-71828883-C-A	PSAP	1		B	-	+
10-71831887-C-A	PSAP	1		B	-	+
10-71851206-G-A	PSAP	1		B	-	+
10-71851221-T-C	PSAP	1	PS3	P	+	+
10-72007692-C-T	CHST3	1		P	-	+
10-72008101-G-A	CHST3	1		B	-	+
10-72551286-C-G	MICU1	1		P	-	+
10-72562974-T-C	MICU1	1		B	-	+
10-73842486-C-G	CAMK2G	1	PS3		+	-
10-75029265-C-G	KAT6B	1		B	-	+
10-75029865-G-A	KAT6B	1		P	-	+
10-76891709-T-C	KCNMA1	1	PS3	P	+	+
10-76910091-C-T	KCNMA1	1		P	-	+
10-76949263-G-A	KCNMA1	1	PS3		+	-
10-76949303-C-T	KCNMA1	1		B	-	+
10-77637609-T-C	KCNMA1	1		B	-	+
10-77985961-G-A	POLR3A	1		P	-	+
10-77986123-T-C	POLR3A	1		B	-	+
10-78002206-C-T	POLR3A	1		P	-	+
10-78007761-C-T	POLR3A	1		P	-	+
10-78009889-C-A	POLR3A	1		B	-	+
10-78009889-C-T	POLR3A	1		B	-	+
10-78009910-T-A	POLR3A	1		B	-	+
10-78029405-C-A	POLR3A	1		P	-	+
10-78033902-A-G	RPS24	1	PS3	P	+	+
10-78033903-T-C	RPS24	1	PS3		+	-
10-78037285-A-G	RPS24	1		B	-	+
10-79292298-C-T	ZMIZ1	1	PS3		+	-
10-80162010-C-T	ANXA11	1		B	-	+
10-80169208-G-A	ANXA11	1		B	-	+
10-80170853-C-A	ANXA11	1		P	-	+
10-80170859-C-T	ANXA11	1	PS3	P	+	+
10-80275177-C-T	MAT1A	1	PS3		+	-
10-80275192-G-A	MAT1A	1	PS3		+	-
10-80276549-G-A	MAT1A	1	PS3		+	-
10-8058787-G-A	GATA3	1		B	-	+
10-8064029-C-T	GATA3	1	PS3		+	-
10-8064109-C-T	GATA3	1		P	-	+
10-84194761-A-G	CDHR1	1		P	-	+
10-84200648-G-C	CDHR1	1		B	-	+
10-84203068-C-T	CDHR1	1		B	-	+
10-84212345-C-G	CDHR1	1		P	-	+
10-86876019-A-C	BMPR1A	1		P	-	+
10-86876022-C-A	BMPR1A	1		B	-	+
10-86892141-G-T	BMPR1A	1	PS3		+	-
10-86899848-T-C	BMPR1A	1	PS3		+	-
10-87053380-G-A	GLUD1	1		P	-	+
10-87053403-C-A	GLUD1	1		P	-	-
10-87057692-G-A	GLUD1	1	PS3		+	-
10-87094394-C-T	GLUD1	1		B	-	-
10-87094666-C-T	GLUD1	1		B	-	+
10-87709196-G-A	PAPSS2	1		B	-	+
10-87715787-G-A	PAPSS2	1		P	-	+
10-87864485-A-G	PTEN	1	PS3		-	-
10-87864513-G-A	PTEN	1	PS3		+	-
10-87864514-A-T	PTEN	1	PS3		+	-
10-87864539-G-A	PTEN	1	PS3		+	-
10-87864545-A-C	PTEN	1	PS3		-	-
10-87894025-A-C	PTEN	1	PS3		+	-
10-87894025-A-G	PTEN	1		P	-	+
10-87894051-G-A	PTEN	1	PS3		+	-
10-87894052-G-A	PTEN	1	PS3		+	-
10-87894076-G-A	PTEN	1	PS3		-	-
10-87894084-A-G	PTEN	1	PS3		+	-
10-87894089-C-A	PTEN	1	PS3		+	-
10-87894089-C-G	PTEN	1	PS3		+	-
10-87925515-T-C	PTEN	1	PS3		+	-
10-87925518-T-C	PTEN	1	PS3		+	-
10-87925518-T-G	PTEN	1	PS3		+	-
10-87925530-A-G	PTEN	1	PS3		+	-
10-87925539-A-C	PTEN	1	PS3		+	-
10-87925544-A-G	PTEN	1	PS3		+	-
10-87925546-G-T	PTEN	1		P	-	+
10-87925550-T-C	PTEN	1	PS3		-	-
10-87925551-A-C	PTEN	1	PS3		+	-
10-87925551-A-G	PTEN	1	PS3		+	-
10-87925557-T-C	PTEN	1	PS3		+	-
10-87931048-G-A	PTEN	1	PS3		+	-
10-87931071-G-A	PTEN	1		B	-	+
10-87931078-T-G	PTEN	1	PS3		+	-
10-87933033-G-T	PTEN	1	PS3		+	-
10-87933034-A-C	PTEN	1	PS3		+	-
10-87933034-A-G	PTEN	1	PS3		+	-
10-87933034-A-T	PTEN	1	PS3		+	-
10-87933036-C-T	PTEN	1	PS3	P	+	+
10-87933037-A-C	PTEN	1	PS3		+	-
10-87933043-C-T	PTEN	1	PS3		+	-
10-87933046-C-T	PTEN	1	PS3		+	-
10-87933052-T-G	PTEN	1	PS3		+	-
10-87933061-T-A	PTEN	1	PS3		+	-
10-87933061-T-C	PTEN	1	PS3		+	-
10-87933072-T-G	PTEN	1	PS3		+	-
10-87933073-G-A	PTEN	1	PS3		+	-
10-87933079-A-G	PTEN	1	PS3		+	-
10-87933079-A-T	PTEN	1	PS3		+	-
10-87933082-T-C	PTEN	1	PS3		+	-
10-87933090-T-C	PTEN	1	PS3		+	-
10-87933094-T-C	PTEN	1	PS3		+	-
10-87933112-A-C	PTEN	1	PS3		+	-
10-87933114-G-C	PTEN	1	PS3	P	+	+
10-87933126-C-G	PTEN	1	PS3		+	-
10-87933126-C-T	PTEN	1	PS3		+	-
10-87933127-A-G	PTEN	1	PS3		+	-
10-87933129-T-A	PTEN	1	PS3		+	-
10-87933129-T-C	PTEN	1	PS3		+	-
10-87933130-G-A	PTEN	1	PS3		+	-
10-87933136-C-T	PTEN	1	PS3		-	-
10-87933138-G-A	PTEN	1	PS3		+	-
10-87933141-A-G	PTEN	1	PS3		+	-
10-87933144-G-A	PTEN	1	PS3		+	-
10-87933144-G-C	PTEN	1	PS3		+	-
10-87933145-G-A	PTEN	1	PS3		+	-
10-87933147-C-G	PTEN	1	PS3		+	-
10-87933148-G-A	PTEN	1	PS3		+	-
10-87933148-G-T	PTEN	1	PS3		+	-
10-87933154-G-A	PTEN	1	PS3		+	-
10-87933154-G-T	PTEN	1	PS3		+	-
10-87933165-T-C	PTEN	1	PS3		+	-
10-87933166-G-A	PTEN	1	PS3		+	-
10-87933166-G-T	PTEN	1	PS3		+	-
10-87933181-A-C	PTEN	1	PS3		+	-
10-87933184-G-C	PTEN	1	PS3		+	-
10-87933222-T-A	PTEN	1	PS3		+	-
10-87933223-A-G	PTEN	1	PS3		+	-
10-87933234-A-G	PTEN	1	PS3		+	-
10-87933235-G-A	PTEN	1	PS3		+	-
10-87933238-C-T	PTEN	1	PS3		+	-
10-87952118-G-A	PTEN	1	PS3		+	-
10-87952133-A-C	PTEN	1	PS3		+	-
10-87952135-T-G	PTEN	1	PS3		+	-
10-87952136-C-A	PTEN	1	PS3		+	-
10-87952142-C-T	PTEN	1	PS3		+	-
10-87952143-G-A	PTEN	1	PS3		+	-
10-87952143-G-C	PTEN	1	PS3		+	-
10-87952145-T-A	PTEN	1	PS3		+	-
10-87952146-A-G	PTEN	1	PS3		+	-
10-87952148-G-A	PTEN	1	PS3		+	-
10-87952167-T-C	PTEN	1	PS3		-	-
10-87952209-T-C	PTEN	1	PS3		+	-
10-87952235-C-G	PTEN	1	PS3		+	-
10-87952258-C-G	PTEN	1	PS3	P	+	+
10-87957940-T-C	PTEN	1	PS3		+	-
10-87957955-C-T	PTEN	1	PS3		+	-
10-87957958-T-C	PTEN	1	PS3		+	-
10-87957973-A-G	PTEN	1	PS3		+	-
10-87957982-T-A	PTEN	1	PS3		+	-
10-87960922-C-G	PTEN	1	PS3		+	-
10-87960922-C-T	PTEN	1	PS3		+	-
10-87960974-T-G	PTEN	1		B	-	+
10-87960984-C-G	PTEN	1		B	-	+
10-87965294-T-C	PTEN	1	PS3		+	-
1-25805142-G-A	SELENON	1.77e-06	Proxy Benign		+	-
10-87965338-A-G	PTEN	1		B	-	+
10-88939543-G-A	ACTA2	1	PS3		+	-
10-88941309-C-T	ACTA2	1	PS3		+	-
10-88943813-C-T	ACTA2	1	PS3		+	-
10-89003044-G-A	FAS	1		B	-	-
10-89007835-A-G	FAS	1		P	-	+
10-89008919-C-T	FAS	1		B	-	+
10-89010797-A-G	FAS	1		B	-	-
10-89014191-G-A	FAS	1		P	-	+
10-89014220-G-A	FAS	1	PS3	P	+	+
10-89214958-A-G	LIPA	1		P	-	+
10-89214995-C-T	LIPA	1		P	-	+
10-89215973-C-T	LIPA	1	PS3		-	-
10-89215984-G-T	LIPA	1	PS3		+	-
10-89225168-A-G	LIPA	1	PS3		+	-
10-89228345-A-T	LIPA	1	PS3		+	-
10-89228368-C-A	LIPA	1	PS3		+	-
10-89228375-G-T	LIPA	1	PS3		+	-
10-89247582-C-T	LIPA	1		B	-	+
10-89247603-T-G	LIPA	1		B	-	+
10-93612810-C-T	PDE6C	1		P	-	+
10-93613196-T-G	PDE6C	1		B	-	+
10-93655782-T-C	PDE6C	1		P	-	-
10-93658960-A-C	PDE6C	1		B	-	+
10-93777592-C-T	LGI1	1		P	-	+
10-93797600-A-G	LGI1	1		B	-	+
10-95606904-C-T	ALDH18A1	1		P	-	+
10-95610260-C-G	ALDH18A1	1		P	-	+
10-95614143-C-T	ALDH18A1	1		B	-	+
10-95626740-G-T	ALDH18A1	1		B	-	+
10-95628405-G-A	ALDH18A1	1		B	-	+
10-95633012-C-T	ALDH18A1	1	PS3	P	+	+
10-95633040-C-G	ALDH18A1	1	PS3		+	-
10-95637328-G-A	ALDH18A1	1	PS3		+	-
10-95637363-C-T	ALDH18A1	1		P	-	+
10-95653341-A-T	ALDH18A1	1		B	-	+
10-95685600-C-A	TCTN3	1		B	-	+
10-95693676-G-A	TCTN3	1		B	-	+
10-95693707-T-G	TCTN3	1		B	-	+
10-95693897-C-T	TCTN3	1		P	-	+
10-95693898-A-C	TCTN3	1		P	-	-
10-95693899-T-C	TCTN3	1		P	-	+
10-97598784-T-G	HOGA1	1		P	-	+
10-97599780-C-T	HOGA1	1	PS3		+	-
10-97601871-G-A	HOGA1	1		B	-	+
10-97601925-T-G	HOGA1	1	PS3		+	-
10-97601968-G-A	HOGA1	1		P	-	+
10-97611606-C-T	HOGA1	1		B	-	+
10-98417664-A-G	HPS1	1	PS3	P	+	+
10-98429811-C-T	HPS1	1		B	-	+
10-99718494-A-G	COX15	1	PS3		+	-
10-99724057-G-A	COX15	1	PS3	P	+	+
10-99727002-C-T	COX15	1		B	-	+
10-99784690-A-T	ABCC2	1		B	-	+
10-99800531-C-T	ABCC2	1		P	-	-
10-99818820-C-T	ABCC2	1		P	-	+
10-99836125-G-A	ABCC2	1	PS3	P	+	+
10-99836193-A-T	ABCC2	1		P	-	-
10-99836218-G-T	ABCC2	1		B	-	+
10-99843874-A-G	ABCC2	1		B	-	+
10-99851537-G-A	ABCC2	1		B	-	+
1-100196274-A-C	DBT	1		P	-	+
1-100196319-C-G	DBT	1		P	-	+
1-100206504-T-C	DBT	1		B	-	+
1-100214840-A-G	DBT	1	PS3	P	+	-
1-100214855-G-A	DBT	1	PS3	P	+	+
1-100214929-A-C	DBT	1		P	-	+
1-100216031-A-G	DBT	1		B	-	+
1-100216040-T-C	DBT	1		B	-	+
1-100218645-C-T	DBT	1		B	-	+
1-100218675-C-T	DBT	1		B	-	+
1-100230772-C-T	DBT	1		P	-	+
1-100235481-A-G	DBT	1		P	-	+
1-100240860-A-G	DBT	1		B	-	+
1-100249784-T-C	DBT	1		B	-	+
1-100462821-G-A	CDC14A	1		B	-	+
1-100468051-C-G	CDC14A	1		P	-	-
1-100468052-G-A	CDC14A	1		P	-	+
1-100484348-G-A	CDC14A	1		B	-	+
1-102888579-G-C	COL11A1	1		B	-	+
1-102888582-A-G	COL11A1	1		B	-	+
1-102888730-C-A	COL11A1	1		P	-	+
1-102888739-C-T	COL11A1	1		P	-	+
1-102978867-C-T	COL11A1	1		P	-	+
1-102984172-C-A	COL11A1	1		P	-	+
1-102984181-C-T	COL11A1	1		P	-	+
1-103006282-T-C	COL11A1	1		B	-	+
1-103082940-A-T	COL11A1	1		B	-	+
1-103082941-A-C	COL11A1	1		B	-	+
1-108155047-C-G	SLC25A24	1	PS3		+	-
1-108157481-C-T	SLC25A24	1	PS3		+	-
1-108934848-G-A	CLCC1	1		B	-	+
1-108950363-G-T	CLCC1	1		P	-	+
1-109573758-G-A	GNAI3	1		P	-	+
1-109574003-G-A	GNAI3	1		B	-	+
11-101453067-C-A	TRPC6	1		P	-	+
11-101453068-G-A	TRPC6	1	PS3	P	+	+
11-101489019-G-A	TRPC6	1		B	-	-
11-101504644-C-T	TRPC6	1	PS3		+	-
11-101583461-G-A	TRPC6	1		B	-	-
11-102954174-A-C	MMP13	1		P	-	+
11-102954497-C-T	MMP13	1		B	-	+
11-102955342-A-G	MMP13	1		P	-	+
11-102955683-G-A	MMP13	1		B	-	+
11-103117775-A-T	DYNC2H1	1		B	-	+
11-103117852-C-T	DYNC2H1	1		P	-	+
11-103120468-C-T	DYNC2H1	1		B	-	+
11-103120705-C-T	DYNC2H1	1		P	-	+
11-103121378-G-A	DYNC2H1	1		B	-	-
11-103125117-G-A	DYNC2H1	1		B	-	+
11-103125197-C-T	DYNC2H1	1	PS3	P	+	+
11-103148531-G-A	DYNC2H1	1		B	-	+
11-103156505-A-G	DYNC2H1	1		B	-	+
11-103158787-A-G	DYNC2H1	1		B	-	+
11-103158916-C-T	DYNC2H1	1		P	-	+
11-103165911-C-T	DYNC2H1	1		P	-	+
11-103165985-C-G	DYNC2H1	1		P	-	+
11-103166014-C-G	DYNC2H1	1		B	-	+
11-103177652-A-T	DYNC2H1	1		P	-	+
11-103177653-T-A	DYNC2H1	1		P	-	+
11-103185032-G-A	DYNC2H1	1		P	-	+
11-103187356-G-A	DYNC2H1	1		P	-	+
11-103188554-A-G	DYNC2H1	1		B	-	+
11-103189698-C-T	DYNC2H1	1		B	-	+
11-103192132-A-G	DYNC2H1	1		B	-	-
11-103192150-C-T	DYNC2H1	1		P	-	+
11-103211861-G-A	DYNC2H1	1		B	-	+
11-103219963-G-A	DYNC2H1	1		B	-	-
11-103243717-G-A	DYNC2H1	1		P	-	-
11-103253384-C-T	DYNC2H1	1		P	-	+
11-103255530-T-C	DYNC2H1	1		P	-	+
11-103259930-T-C	DYNC2H1	1		P	-	+
11-103283029-G-C	DYNC2H1	1		B	-	+
11-103286330-A-G	DYNC2H1	1		B	-	+
11-103287549-C-T	DYNC2H1	1		B	-	-
11-103479158-A-G	DYNC2H1	1		P	-	+
11-10500245-C-T	AMPD3	1	PS3		+	-
1-110603569-G-A	KCNA2	1	PS3		+	-
1-110603894-G-A	KCNA2	1		P	-	+
1-110603902-C-T	KCNA2	1	PS3		+	-
1-110603914-A-G	KCNA2	1	PS3		+	-
1-110604748-G-A	KCNA2	1		B	-	+
11-10752700-C-G	CTR9	1		P	-	+
11-10779032-A-G	CTR9	1		B	-	+
11-108121619-G-C	ACAT1	1		B	-	+
11-108133917-A-C	ACAT1	1	PS3		+	-
11-108135184-G-C	ACAT1	1	PS3		+	-
11-108138934-A-G	ACAT1	1	PS3		+	-
11-108138935-A-G	ACAT1	1	PS3		+	-
11-108139009-G-A	ACAT1	1		P	-	+
11-108142500-C-T	ACAT1	1	PS3		-	-
11-108144039-G-C	ACAT1	1	PS3		+	-
11-108227625-A-C	ATM	1	PS3	P	+	+
11-108227625-A-G	ATM	1		P	-	+
11-108227626-T-C	ATM	1	PS3	P	+	+
11-108227849-C-G	ATM	1		B	-	+
11-108235708-A-G	ATM	1		B	-	+
11-108235716-T-A	ATM	1		B	-	+
11-108244000-G-C	ATM	1		B	-	+
11-108244022-G-A	ATM	1		B	-	+
11-108245000-C-T	ATM	1	PS3	P	-	+
11-108248940-A-G	ATM	1		B	-	+
11-108251006-G-A	ATM	1		B	-	+
11-108251865-C-G	ATM	1		B	-	+
11-108251975-C-G	ATM	1		B	-	+
11-108254034-T-C	ATM	1		B	-	+
11-108257592-A-C	ATM	1		B	-	+
11-108259051-C-A	ATM	1		B	-	-
11-108267276-T-C	ATM	1		B	-	+
11-108267318-C-T	ATM	1		B	-	+
11-108271074-T-G	ATM	1		P	-	+
11-108271258-T-C	ATM	1		P	-	-
11-108272572-A-G	ATM	1		B	-	+
11-108272729-C-G	ATM	1		B	-	+
11-108272816-A-G	ATM	1		P	-	+
11-108279589-A-G	ATM	1		B	-	-
11-108284328-T-C	ATM	1	PS3	P	+	+
3-193626168-A-C	OPA1	3.67e-06	Proxy Benign		+	-
11-108289005-C-T	ATM	1		B	-	-
11-108289623-C-T	ATM	1		B	-	+
11-108289759-T-C	ATM	1	PS3		+	-
11-108297326-A-G	ATM	1		B	-	+
11-108301698-C-T	ATM	1	PS3	P	+	+
11-108301706-G-A	ATM	1	PS3	P	+	+
11-108304735-G-A	ATM	1		B	-	+
11-108307915-G-A	ATM	1		B	-	+
11-108310222-C-T	ATM	1	PS3	P	+	+
11-108312440-G-A	ATM	1		B	-	+
11-108315863-A-G	ATM	1	PS3		+	-
11-108315904-A-G	ATM	1		B	-	+
11-108316030-G-A	ATM	1	PS3	P	+	+
11-108317374-C-A	ATM	1	PS3	P	+	+
11-108317409-G-A	ATM	1		B	-	+
11-108317412-T-G	ATM	1		P	-	+
11-108325416-C-T	ATM	1	PS3		+	-
11-108327664-T-C	ATM	1		B	-	+
11-108329112-C-T	ATM	1	PS3	P	+	-
11-108329202-T-G	ATM	1	PS3		+	-
11-108330314-T-G	ATM	1		P	-	+
11-108331498-G-C	ATM	1	PS3		+	-
11-108333955-C-A	ATM	1		P	-	+
11-108335063-T-G	ATM	1		P	-	+
11-108335080-G-A	ATM	1	PS3	P	+	-
11-108335080-G-C	ATM	1		P	-	+
11-108335104-G-T	ATM	1		P	-	+
11-108335105-T-C	ATM	1	PS3	P	+	+
11-108343246-G-A	ATM	1	PS3	P	+	+
11-108345818-C-T	ATM	1	PS3		+	-
11-108345819-G-C	ATM	1		P	-	+
11-108345819-G-T	ATM	1		P	-	+
11-108345870-G-C	ATM	1	PS3		+	-
11-108353831-G-T	ATM	1		P	-	+
11-108365359-C-T	ATM	1	PS3		+	-
11-108365360-G-A	ATM	1	PS3	P	+	+
1-11109322-T-C	MTOR	1		B	-	+
1-11109718-C-T	MTOR	1		B	-	+
1-11114338-A-G	MTOR	1	PS3	P	+	+
1-11114363-C-T	MTOR	1		P	-	+
1-11114380-C-A	MTOR	1		P	-	+
1-11114402-C-T	MTOR	1		P	-	+
1-11117039-C-T	MTOR	1	PS3	P	-	+
11-112087884-G-A	SDHD	1		B	-	+
11-112087953-A-G	SDHD	1		B	-	+
11-112088939-C-T	SDHD	1	PS3		+	-
11-112094830-T-G	SDHD	1	PS3		+	-
11-112094831-A-G	SDHD	1	PS3	P	+	+
11-112094832-T-A	SDHD	1		P	-	+
11-112228656-A-G	PTS	1	PS3		+	-
11-112230639-C-T	PTS	1	PS3		+	-
11-112233205-G-A	PTS	1	PS3		+	-
1-11124516-G-A	MTOR	1		P	-	+
1-11124516-G-T	MTOR	1		P	-	+
1-11128107-G-A	MTOR	1	PS3	P	+	+
1-11128107-G-C	MTOR	1		P	-	-
1-11128107-G-T	MTOR	1		P	-	+
1-11129789-A-C	MTOR	1		P	-	+
1-11129790-A-G	MTOR	1		P	-	+
1-11130641-G-A	MTOR	1		B	-	+
1-11130648-C-T	MTOR	0.367153		B	-	+
1-11130747-C-T	MTOR	1		P	-	+
1-11134400-C-T	MTOR	1		B	-	+
1-11134410-C-A	MTOR	1		B	-	-
1-11139386-C-T	MTOR	1		B	-	+
1-11139590-A-C	MTOR	1		B	-	+
1-11144674-G-A	MTOR	1		B	-	+
1-11157153-A-G	MTOR	1		P	-	+
1-11157173-C-T	MTOR	1		P	-	+
1-11157174-A-G	MTOR	1		P	-	+
1-11157242-A-G	MTOR	1		P	-	+
11-116836022-C-G	APOA1	1		P	-	+
11-116836316-A-G	APOA1	1	PS3		+	-
11-116837020-C-T	APOA1	1		B	-	+
11-117351872-C-T	CEP164	1		P	-	+
11-117351876-G-A	CEP164	1		B	-	+
1-111776180-G-A	KCND3	1		B	-	+
1-111777219-T-C	KCND3	1		B	-	+
1-111780707-C-T	KCND3	1		B	-	+
1-111787039-C-T	KCND3	1	PS3		+	-
1-111787063-C-T	KCND3	1		P	-	-
1-111787083-G-A	KCND3	1	PS3	P	+	+
11-117989554-C-T	IL10RA	1	PS3	P	+	+
11-117999163-C-T	IL10RA	1		B	-	+
11-118436601-C-G	KMT2A	1		B	-	+
11-118472352-A-G	KMT2A	1		B	-	+
11-118478092-C-T	KMT2A	1		P	-	+
11-118478093-G-A	KMT2A	1		P	-	+
11-118478105-G-A	KMT2A	1		P	-	+
11-118478197-T-C	KMT2A	1		P	-	+
11-118481987-C-G	KMT2A	1		B	-	-
11-118488624-G-A	KMT2A	1		P	-	+
11-118488648-A-G	KMT2A	1		P	-	+
11-118503367-A-G	KMT2A	1		B	-	+
11-118503875-G-C	KMT2A	1		B	-	+
11-118509150-T-C	KMT2A	1		B	-	+
11-118755491-C-T	DDX6	1		P	-	+
11-118756262-G-A	DDX6	1	PS3		+	-
11-118786061-G-T	DDX6	1		B	-	+
11-119025299-C-A	SLC37A4	1	PS3		-	-
11-119026052-C-T	SLC37A4	1	PS3		+	-
3-128481943-G-A	GATA2	3.79e-06	Proxy Benign		+	-
11-119027808-C-T	SLC37A4	1	PS3		+	-
11-119028223-A-G	SLC37A4	1	PS3	P	-	+
11-119028373-C-T	SLC37A4	1	PS3		-	-
11-119081189-T-G	VPS11	1	PS3	P	+	+
11-119081604-A-C	VPS11	1		B	-	-
11-119088292-G-A	HMBS	1	PS3		+	-
11-119088297-C-T	HMBS	1	PS3		+	-
11-119088298-G-A	HMBS	1	PS3		+	-
11-119088298-G-C	HMBS	1	PS3		+	-
11-119088298-G-T	HMBS	1	PS3		+	-
11-119088651-C-T	HMBS	1	PS3		+	-
11-119088672-T-C	HMBS	1	PS3		+	-
11-119088681-C-T	HMBS	1		B	-	+
11-119089991-C-T	HMBS	1	PS3		+	-
11-119091413-C-T	HMBS	1	PS3		+	-
11-119091431-C-T	HMBS	1	PS3		+	-
11-119091432-G-C	HMBS	1	PS3		+	-
11-119091515-C-T	HMBS	1	PS3		+	-
11-119092155-G-A	HMBS	1		P	-	+
11-119092491-T-C	HMBS	1	PS3		+	-
11-119092785-G-A	HMBS	1	PS3	P	+	+
11-119093189-C-T	HMBS	1	PS3		+	-
11-119093272-G-A	HMBS	1		B	-	+
11-119097048-T-C	DPAGT1	1		B	-	+
11-119097180-G-A	DPAGT1	1	PS3		+	-
11-119097870-C-T	DPAGT1	1		P	-	+
11-119278170-A-C	CBL	1	PS3	P	+	+
11-119278170-A-G	CBL	1		P	-	-
11-119278181-T-A	CBL	1		P	-	+
11-119278181-T-C	CBL	1	PS3	P	+	+
11-119278181-T-G	CBL	1	PS3	P	+	+
11-119278182-A-C	CBL	1		P	-	+
11-119278236-A-C	CBL	1		P	-	+
11-119278541-G-A	CBL	1	PS3	P	+	+
11-119284996-A-G	CBL	1		B	-	+
11-119285272-C-A	CBL	1		B	-	+
11-119285402-C-T	CBL	1		B	-	+
11-119285496-T-C	CBL	1		B	-	+
11-119297446-C-T	CBL	1		B	-	-
11-119299602-G-A	CBL	1		B	-	+
11-119299629-C-T	CBL	1		B	-	+
11-119299770-G-A	CBL	1		B	-	+
11-119341673-G-A	MFRP	1		P	-	+
11-119344876-C-T	MFRP	1		B	-	+
1-111981822-C-G	KCND3	1	PS3		-	-
1-111981858-C-T	KCND3	1		P	-	+
1-11210822-T-C	MTOR	1		B	-	+
11-121102721-A-G	TECTA	1		B	-	+
11-121137783-G-A	TECTA	1		B	-	+
11-121152973-C-T	TECTA	1		B	-	+
11-121168064-C-T	TECTA	1		P	-	+
11-121168135-C-T	TECTA	1		P	-	+
11-121187849-A-G	TECTA	1		P	-	+
1-11212842-T-C	MTOR	1		B	-	+
1-11213437-T-C	MTOR	1		B	-	+
1-11240489-C-T	MTOR	1		B	-	+
1-11241668-T-C	MTOR	1		B	-	+
1-11247705-T-C	MTOR	1		B	-	+
1-11248030-T-A	MTOR	1		B	-	-
11-124868925-T-C	ROBO3	1		P	-	+
11-124875576-C-T	ROBO3	1		P	-	+
11-124876444-G-C	ROBO3	1		B	-	+
11-124878300-G-A	ROBO3	1		B	-	+
11-124921418-T-C	HEPACAM	1		B	-	+
11-124922771-T-C	HEPACAM	1		B	-	+
11-124924880-C-T	HEPACAM	1		P	-	+
11-124924881-G-A	HEPACAM	1		P	-	+
11-124924889-C-T	HEPACAM	1	PS3		+	-
11-124924890-C-T	HEPACAM	1	PS3	P	+	+
11-124935999-C-G	HEPACAM	1		B	-	+
1-11256955-T-C	MTOR	1		B	-	+
11-125893851-C-G	PUS3	1		B	-	+
11-125894007-C-T	PUS3	1		B	-	+
11-125896073-T-C	PUS3	1		P	-	+
11-125896284-T-C	PUS3	1		P	-	+
11-125899454-A-C	HYLS1	1		B	-	-
11-126001812-G-C	CDON	1	PS3		+	-
11-126276122-G-A	FOXRED1	1		P	-	+
11-126276147-C-G	FOXRED1	1		B	-	+
11-128839231-A-G	KCNJ1	1		B	-	+
11-128839357-A-C	KCNJ1	1		P	-	+
11-128839370-G-A	KCNJ1	1	PS3	P	+	-
11-128839676-G-A	KCNJ1	1		B	-	+
11-128839772-C-T	KCNJ1	1	PS3		+	-
11-128839993-G-A	KCNJ1	1		P	-	+
11-128840045-T-C	KCNJ1	1		B	-	+
11-128911395-G-A	KCNJ5	1		B	-	+
11-128911724-G-A	KCNJ5	1		P	-	+
11-134253620-G-C	ACAD8	1		B	-	+
11-134257163-G-A	ACAD8	1		P	-	+
11-134259029-C-G	ACAD8	1		B	-	+
11-134262556-G-A	ACAD8	1		P	-	+
11-13694940-G-A	FAR1	1		B	-	+
11-13728664-C-T	FAR1	1	PS3	P	+	-
11-14358803-C-A	RRAS2	1	PS3		+	-
1-114713908-T-C	NRAS	1	PS3		+	-
1-114713911-C-T	NRAS	1	PS3		-	-
1-114713917-G-A	NRAS	1	PS3		-	-
1-114713941-G-A	NRAS	1	PS3		+	-
1-114716090-A-T	NRAS	1	PS3		+	-
1-114716123-C-T	NRAS	1	PS3		-	-
1-114716126-C-A	NRAS	1	PS3		-	-
1-114716126-C-T	NRAS	1	PS3		+	-
1-115705208-G-A	CASQ2	1	PS3	P	+	+
1-115726998-T-C	CASQ2	1		B	-	+
1-115768316-C-T	CASQ2	1		B	-	+
1-115768346-T-C	CASQ2	1		B	-	+
1-115768378-T-C	CASQ2	1		P	-	+
1-115768540-A-G	CASQ2	1		P	-	+
1-116384802-T-G	ATP1A1	1		P	-	+
1-116390373-A-G	ATP1A1	1		B	-	+
1-116393559-C-T	ATP1A1	1		B	-	+
1-116395187-A-G	ATP1A1	1		B	-	+
1-116395224-T-C	ATP1A1	1	PS3	P	+	+
1-116395247-C-G	ATP1A1	1	PS3		+	-
1-116399502-T-C	ATP1A1	1		P	-	+
11-17387083-C-T	KCNJ11	1		B	-	+
11-17387103-T-C	KCNJ11	1		P	-	+
11-17387128-C-T	KCNJ11	1		P	-	+
11-17387395-G-A	KCNJ11	1	PS3		+	-
11-17387413-C-T	KCNJ11	1	PS3		+	-
11-17387490-C-T	KCNJ11	1	PS3		+	-
11-17387917-C-T	KCNJ11	1	PS3		+	-
11-17387943-C-T	KCNJ11	1	PS3		+	-
11-17387992-G-A	KCNJ11	1	PS3		+	-
11-17388025-T-C	KCNJ11	1		B	-	+
11-17394295-C-T	ABCC8	1	PS3		+	-
11-17394379-C-T	ABCC8	1	PS3		+	-
11-17395214-C-T	ABCC8	1	PS3		+	-
11-17395659-G-A	ABCC8	1	PS3		+	-
11-17395664-C-T	ABCC8	1	PS3		+	-
11-17395918-C-T	ABCC8	1	PS3		+	-
11-17396930-C-A	ABCC8	1		B	-	+
11-17402670-C-T	ABCC8	1	PS3	P	-	+
11-17402671-G-A	ABCC8	1		P	-	+
11-17407386-T-C	ABCC8	1		B	-	+
11-17413396-G-A	ABCC8	1	PS3		+	-
11-17427124-C-T	ABCC8	1	PS3		-	-
11-17430953-C-T	ABCC8	1		B	-	+
11-17442774-G-A	ABCC8	1	PS3		+	-
11-17460571-C-T	ABCC8	1	PS3		+	-
11-17461783-C-T	ABCC8	1	PS3		+	-
11-17463457-A-T	ABCC8	1	PS3		+	-
11-17463515-G-A	ABCC8	1	PS3		-	-
11-17470182-C-T	ABCC8	1		P	-	+
11-17474956-G-A	ABCC8	1	PS3		+	-
11-17476701-A-T	ABCC8	1	PS3		+	-
11-17476758-C-G	ABCC8	1	PS3		+	-
11-17495607-C-T	USH1C	1		B	-	-
11-17531231-C-G	USH1C	1		P	-	+
11-17771771-A-T	KCNC1	1		B	-	+
11-17771777-G-T	KCNC1	1		B	-	+
11-17772053-G-A	KCNC1	1	PS3	P	+	-
11-17772290-C-T	KCNC1	1		P	-	+
11-17772356-C-T	KCNC1	1	PS3	P	+	+
11-17779610-G-T	KCNC1	1		B	-	+
12-120737842-G-C	ACADS	5.44e-06	Proxy Benign		+	-
16-88832029-G-A	GALNS	6.51e-06	Proxy Benign		+	-
1-11792307-G-A	MTHFR	1		P	-	+
1-11792355-G-A	MTHFR	1		B	-	+
1-11794028-T-A	MTHFR	1		B	-	+
1-11794389-A-G	MTHFR	1		P	-	+
1-11794419-T-G	MTHFR	1		B	-	+
1-11794825-C-T	MTHFR	1		P	-	+
1-11795116-A-G	MTHFR	1	PS3	P	+	+
1-11795158-T-C	MTHFR	1	PS3		+	-
1-11802915-G-C	MTHFR	1	PS3		-	-
1-11802962-C-T	MTHFR	1	PS3		+	-
1-11802980-C-T	MTHFR	1	PS3		+	-
11-1841523-G-A	TNNI2	1	PS3		+	-
1-119033161-A-C	WARS2	1	PS3		+	-
1-119419495-G-A	HSD3B2	1		B	-	+
1-119419519-G-A	HSD3B2	1		P	-	+
1-119422019-T-G	HSD3B2	1	PS3		+	-
1-119422165-C-A	HSD3B2	1	PS3		+	-
1-119422166-C-A	HSD3B2	1	PS3		+	-
1-119422277-C-T	HSD3B2	1	PS3		+	-
1-11963575-G-A	PLOD1	1		B	-	+
1-119712024-T-C	PHGDH	1		P	-	+
1-119723381-C-G	PHGDH	1		B	-	+
1-119726897-C-T	PHGDH	1		P	-	-
1-11972968-G-A	PLOD1	1		P	-	+
1-119734718-C-G	PHGDH	1		B	-	+
1-119740425-A-T	PHGDH	1		B	-	+
1-119741817-G-A	PHGDH	1	PS3		+	-
1-119743906-G-A	PHGDH	1	PS3	P	+	+
1-119750830-C-T	HMGCS2	1	PS3	P	+	-
1-119755490-G-C	HMGCS2	1		B	-	+
1-119759915-C-T	HMGCS2	1	PS3		+	-
16-88822632-T-C	GALNS	9.11e-06	Proxy Benign		+	-
1-11992606-T-C	MFN2	1	PS3		+	-
1-11992659-C-T	MFN2	1	PS3		+	-
1-11992660-G-A	MFN2	1	PS3		+	-
1-11999025-C-G	MFN2	1		P	-	+
1-11999025-C-T	MFN2	1		P	-	-
1-11999054-C-T	MFN2	1	PS3		+	-
1-12001423-G-A	MFN2	1	PS3		-	-
1-12001476-G-A	MFN2	1		B	-	+
1-12002033-C-T	MFN2	1	PS3		+	-
1-12002034-G-C	MFN2	1		P	-	+
1-12002069-A-G	MFN2	1		P	-	+
1-12004010-G-A	MFN2	1		B	-	+
1-12004895-A-G	MFN2	1		B	-	+
1-12009635-G-A	MFN2	1		B	-	+
1-12009641-C-T	MFN2	1	PS3		+	-
1-12011510-G-C	MFN2	1	PS3		+	-
11-20601220-C-T	SLC6A5	1		B	-	-
11-20601262-C-G	SLC6A5	1		B	-	+
11-20607054-C-A	SLC6A5	1	PS3		+	-
11-20626733-C-T	SLC6A5	1		P	-	+
11-20636322-T-C	SLC6A5	1	PS3	P	+	+
2-166043677-C-A	SCN1A	1.18e-05	Proxy Benign		+	-
11-2133063-C-T	IGF2	1		B	-	+
11-2135424-C-A	IGF2	1		P	-	+
11-2160809-G-A	INS	1	PS3		+	-
11-2160878-C-T	INS	1	PS3		-	-
11-2160901-G-T	INS	1	PS3		+	-
11-2164345-G-A	TH	1	PS3		+	-
11-2165266-A-G	TH	1		P	-	+
11-2166003-G-A	TH	1	PS3		+	-
11-2166544-C-A	TH	1	PS3		+	-
11-2166760-C-T	TH	1		P	-	+
11-2167905-C-T	TH	1	PS3		+	-
11-2169721-C-T	TH	1		B	-	+
11-2171771-C-T	TH	1		B	-	+
11-22218279-C-T	ANO5	1	PS3	P	+	+
11-22221158-A-G	ANO5	1		P	-	+
11-22227542-G-A	ANO5	1		B	-	+
11-22227554-A-G	ANO5	1		B	-	+
11-22236206-G-T	ANO5	1		P	-	+
11-22239606-C-G	ANO5	1		B	-	+
11-22250324-A-T	ANO5	1		B	-	+
11-22259649-C-T	ANO5	1	PS3		+	-
11-22262162-G-T	ANO5	1	PS3	P	+	-
11-22270376-T-C	ANO5	1		P	-	+
11-22270431-A-G	ANO5	1		P	-	+
11-22274605-C-T	ANO5	1		P	-	+
11-22274687-T-G	ANO5	1		B	-	-
6-32040424-G-A	CYP21A2	1.28e-05	Proxy Benign		+	-
11-22279669-C-G	ANO5	1		B	-	+
1-12249306-G-C	VPS13D	1		B	-	+
1-12253770-A-G	VPS13D	1		B	-	-
1-12277157-G-A	VPS13D	1		P	-	+
1-1232279-A-G	B3GALT6	1	PS3		+	-
1-1232280-T-C	B3GALT6	1		P	-	+
1-1232666-G-A	B3GALT6	1		B	-	+
1-1232735-C-A	B3GALT6	1		B	-	+
1-1232800-G-C	B3GALT6	1		B	-	+
1-1232834-T-C	B3GALT6	1		P	-	+
1-1233203-T-A	B3GALT6	1	PS3	P	+	+
11-2445430-A-G	KCNQ1	1	PS3		+	-
11-2445442-A-G	KCNQ1	1	PS3		+	-
11-2445453-G-C	KCNQ1	1		P	-	+
1-12456080-C-T	VPS13D	1		P	-	+
11-2527962-G-A	KCNQ1	1	PS3		-	-
11-2570652-G-A	KCNQ1	1	PS3		+	-
11-2570652-G-C	KCNQ1	1	PS3		+	-
11-2570668-T-A	KCNQ1	1	PS3		+	-
11-2570670-C-T	KCNQ1	1	PS3		+	-
11-2570671-G-A	KCNQ1	1		P	-	+
11-2570682-G-A	KCNQ1	1	PS3		+	-
11-2570685-G-A	KCNQ1	1	PS3		+	-
11-2570706-G-T	KCNQ1	1	PS3		+	-
11-2570715-G-A	KCNQ1	1	PS3		-	-
11-2570719-G-A	KCNQ1	1	PS3		+	-
11-2570719-G-T	KCNQ1	1	PS3		+	-
11-2570739-C-T	KCNQ1	1	PS3		+	-
11-2570754-G-A	KCNQ1	1	PS3		+	-
11-2571333-G-A	KCNQ1	1	PS3		+	-
11-2571339-G-A	KCNQ1	1		B	-	+
11-2571391-C-T	KCNQ1	1	PS3		+	-
11-2572030-A-C	KCNQ1	1	PS3		+	-
11-2572033-T-A	KCNQ1	1	PS3		+	-
11-2572045-T-C	KCNQ1	1	PS3		+	-
11-2572053-G-A	KCNQ1	1	PS3		+	-
11-2572056-C-T	KCNQ1	1	PS3		+	-
11-2572057-G-A	KCNQ1	1	PS3		+	-
11-2572081-T-C	KCNQ1	1	PS3		+	-
11-2572089-G-A	KCNQ1	1	PS3		+	-
11-2572102-A-G	KCNQ1	1	PS3		-	-
11-2572104-C-T	KCNQ1	1	PS3		+	-
11-2572862-T-C	KCNQ1	1	PS3		+	-
11-2572870-G-A	KCNQ1	1	PS3		+	-
11-2572871-G-A	KCNQ1	1	PS3		+	-
11-2572882-C-T	KCNQ1	1	PS3		+	-
11-2572895-C-T	KCNQ1	1	PS3		+	-
11-2572904-T-A	KCNQ1	1	PS3		+	-
11-2572970-C-T	KCNQ1	1	PS3		+	-
11-2572979-G-C	KCNQ1	1	PS3		+	-
11-2572981-G-A	KCNQ1	1	PS3		+	-
11-2572981-G-C	KCNQ1	1	PS3		+	-
11-2583441-G-A	KCNQ1	1	PS3		+	-
11-2583448-C-T	KCNQ1	1	PS3		+	-
11-2583453-G-A	KCNQ1	1	PS3		+	-
11-2583457-A-C	KCNQ1	1	PS3		+	-
11-2583457-A-G	KCNQ1	1	PS3		+	-
11-2583459-G-A	KCNQ1	1		P	-	+
11-2583462-G-A	KCNQ1	1	PS3		+	-
11-2583471-C-T	KCNQ1	1	PS3	P	+	+
11-2583477-A-G	KCNQ1	1	PS3		+	-
11-2583478-C-T	KCNQ1	1	PS3		+	-
11-2583486-G-A	KCNQ1	1	PS3		+	-
11-2583529-T-C	KCNQ1	1	PS3		+	-
11-2583535-C-A	KCNQ1	1	PS3		+	-
11-2583535-C-T	KCNQ1	1	PS3		+	-
11-2583537-C-T	KCNQ1	1	PS3		+	-
11-2583540-C-T	KCNQ1	1		P	-	+
11-2583544-C-A	KCNQ1	1	PS3		-	-
11-2583544-C-T	KCNQ1	1	PS3		+	-
11-2585264-A-G	KCNQ1	1	PS3		+	-
11-2585275-C-T	KCNQ1	1	PS3		+	-
11-2585276-G-A	KCNQ1	1	PS3	P	+	+
11-2585300-T-A	KCNQ1	1	PS3		+	-
11-2587663-C-G	KCNQ1	1		B	-	+
11-2588799-C-A	KCNQ1	1		B	-	+
11-2588804-C-G	KCNQ1	1		B	-	+
11-2768888-T-G	KCNQ1	1	PS3		+	-
11-2768894-A-C	KCNQ1	1	PS3		+	-
11-2775984-C-T	KCNQ1	1	PS3		+	-
11-2776006-C-T	KCNQ1	1	PS3		+	-
11-2776032-C-T	KCNQ1	1	PS3		-	-
11-2776033-G-A	KCNQ1	1	PS3		+	-
11-2776038-A-G	KCNQ1	1	PS3		+	-
11-2778003-C-T	KCNQ1	1	PS3		+	-
11-2778009-G-A	KCNQ1	1	PS3		+	-
11-2778014-C-T	KCNQ1	1	PS3		+	-
11-2778024-G-A	KCNQ1	1	PS3		+	-
11-2847899-G-A	KCNQ1	1		B	-	+
11-2847914-G-A	KCNQ1	1		B	-	+
11-2884110-G-C	CDKN1C	1		P	-	+
11-2884814-G-C	CDKN1C	1		B	-	+
11-2884964-C-G	CDKN1C	1		B	-	+
11-2885281-G-A	CDKN1C	1		P	-	+
11-298602-G-A	IFITM5	1		B	-	+
11-299372-G-A	IFITM5	1		P	-	+
11-3019263-C-T	CARS1	1	PS3		+	-
11-31801561-G-T	PAX6	1	PS3		+	-
11-31801658-A-C	PAX6	1	PS3		+	-
11-32392014-C-A	WT1	1		P	-	+
11-32392014-C-T	WT1	1	PS3		+	-
11-32392019-C-T	WT1	1	PS3		+	-
11-32392020-G-A	WT1	1	PS3		+	-
11-32392704-C-T	WT1	1	PS3	P	+	+
11-32392705-G-A	WT1	1	PS3		+	-
11-32435102-C-T	WT1	1		B	-	+
11-32435145-C-A	WT1	1		B	-	+
11-35280979-C-T	SLC1A2	1		B	-	+
11-35292512-G-C	SLC1A2	1		P	-	-
11-36573555-A-G	RAG1	1		B	-	+
11-36573599-G-A	RAG1	1		B	-	+
11-36573790-T-A	RAG1	1		B	-	+
16-88822673-A-G	GALNS	1.36e-05	Proxy Benign		+	-
6-32040469-G-T	CYP21A2	1.61e-05	Proxy Benign		+	-
11-36574029-A-G	RAG1	1		B	-	+
11-36574050-A-G	RAG1	1		B	-	-
11-36574210-C-A	RAG1	1		B	-	+
11-36574484-C-T	RAG1	1	PS3		+	-
11-36574490-C-T	RAG1	1		P	-	-
11-36574514-C-T	RAG1	1	PS3	P	+	+
11-36574532-C-T	RAG1	1	PS3	P	+	+
11-36574607-A-G	RAG1	1	PS3		+	-
11-36574635-C-T	RAG1	1	PS3	P	+	+
1-114708566-C-G	NRAS	2.78e-05	Proxy Benign		+	-
11-36574665-T-A	RAG1	1	PS3	P	-	+
11-36574725-G-A	RAG1	1	PS3		+	-
11-36574870-G-T	RAG1	1	PS3		-	-
11-36574877-C-T	RAG1	1		B	-	+
11-36574981-G-T	RAG1	1	PS3	P	+	+
11-36574986-G-A	RAG1	1		P	-	+
11-36575451-G-A	RAG1	1		P	-	-
11-36575468-G-A	RAG1	1	PS3	P	-	+
11-36575514-G-A	RAG1	1		P	-	+
11-36575630-C-T	RAG1	1		P	-	+
11-36575636-C-T	RAG1	1		P	-	+
11-36575637-G-A	RAG1	1	PS3		+	-
11-36575763-A-G	RAG1	1		B	-	+
11-36575826-G-A	RAG1	1	PS3		+	-
11-36575942-G-A	RAG1	1		B	-	-
11-36575963-G-A	RAG1	1		B	-	+
11-36576227-C-T	RAG1	1	PS3		+	-
11-36576228-G-A	RAG1	1	PS3	P	+	+
11-36576278-A-G	RAG1	1	PS3		+	-
11-36592773-G-A	RAG2	1		P	-	+
11-36592817-C-G	RAG2	1	PS3		+	-
15-40405859-G-A	IVD	2.99e-05	Proxy Benign		+	-
11-36593291-T-C	RAG2	1		B	-	+
11-36593483-C-G	RAG2	1		P	-	+
11-36593483-C-T	RAG2	1		P	-	+
11-36593525-G-A	RAG2	1		B	-	+
11-36593886-C-T	RAG2	1	PS3		+	-
11-36593939-G-T	RAG2	1		P	-	+
11-36593976-C-A	RAG2	1	PS3		+	-
11-36594054-T-C	RAG2	1	PS3		+	-
11-36594065-C-A	RAG2	1	PS3		+	-
11-36594065-C-G	RAG2	1	PS3		+	-
11-36594147-C-T	RAG2	1		B	-	+
11-3823914-C-T	PGAP2	1		P	-	+
11-3824078-G-A	PGAP2	1		B	-	+
11-3967674-A-G	STIM1	1		P	-	+
11-4023928-A-G	STIM1	1		P	-	+
11-4074620-C-T	STIM1	1		P	-	+
11-4086513-C-T	STIM1	1		B	-	+
11-4091352-C-T	STIM1	1		B	-	+
11-4091578-C-A	STIM1	1		B	-	+
11-44107720-C-T	EXT2	1		B	-	+
11-44107836-A-G	EXT2	1		B	-	+
11-44114237-G-A	EXT2	1		P	-	+
11-44126892-G-A	EXT2	1		P	-	+
11-44130136-C-A	EXT2	1		P	-	+
11-44171645-T-C	EXT2	1		B	-	+
11-45810958-A-G	SLC35C1	1		B	-	+
11-45811112-C-T	SLC35C1	1		P	-	+
1-145912483-C-T	PEX11B	1		B	-	+
11-45913847-G-A	PEX16	1		P	-	+
11-45914138-C-G	PEX16	1		B	-	+
11-45914331-G-A	PEX16	1		P	-	+
11-45915716-C-T	PEX16	1		B	-	-
1-145918688-T-C	PEX11B	1		P	-	+
1-146018429-G-C	HJV	1		B	-	+
1-146018516-A-G	HJV	1		P	-	+
1-146020223-C-G	HJV	1		B	-	+
11-46701545-C-G	ZNF408	1		B	-	+
11-46704389-A-G	ZNF408	1		B	-	+
11-46705063-C-T	ZNF408	1		P	-	+
11-46705321-C-T	ZNF408	1		P	-	+
11-46723453-C-T	F2	1		B	-	+
11-46728746-C-T	F2	1	PS3		+	-
11-46739326-G-A	F2	1	PS3	P	+	+
11-46875805-T-G	LRP4	1		P	-	+
11-46877220-T-C	LRP4	1		B	-	+
11-47234614-T-C	DDB2	1		B	-	+
11-47234872-G-A	DDB2	1		P	-	+
11-47332146-T-C	MYBPC3	1	PS3		+	-
11-47332173-A-G	MYBPC3	1		P	-	+
11-47332891-C-T	MYBPC3	1		B	-	+
1-42927793-T-G	SLC2A1	3.11e-05	Proxy Benign		+	-
11-47333743-G-A	MYBPC3	1		B	-	+
7-155803553-C-A	SHH	9.05e-05	Proxy Benign		+	-
11-47334002-G-A	MYBPC3	1		B	-	+
6-7541918-G-T	DSP	9.82e-05	Proxy Benign		-	-
11-47337495-G-A	MYBPC3	1		B	-	+
11-47337534-C-T	MYBPC3	1	PS3	P	+	+
11-47337535-G-A	MYBPC3	1		P	-	+
11-47337729-A-G	MYBPC3	1	PS3	P	+	+
11-47342085-A-G	MYBPC3	1		P	-	+
11-47342578-C-G	MYBPC3	1	PS3	P	+	+
11-47342611-C-G	MYBPC3	1	PS3	P	+	+
11-47342638-C-T	MYBPC3	1		B	-	+
11-47342697-C-T	MYBPC3	1		P	-	+
11-47342698-G-A	MYBPC3	1	PS3	P	+	+
11-47342718-C-T	MYBPC3	1	PS3	P	+	+
11-47342719-G-A	MYBPC3	1		P	-	+
11-47342719-G-C	MYBPC3	1		P	-	+
11-47343029-A-G	MYBPC3	1		P	-	+
11-47343129-T-C	MYBPC3	1		B	-	+
11-47343571-G-A	MYBPC3	1		B	-	+
11-47346320-C-T	MYBPC3	1		B	-	+
11-47348424-C-T	MYBPC3	1	PS3	P	+	+
11-47348486-T-G	MYBPC3	1	PS3	P	+	+
11-47348490-T-C	MYBPC3	1		B	-	+
11-47348541-C-G	MYBPC3	1	PS3	P	+	+
11-47349863-C-T	MYBPC3	1		B	-	+
11-47349898-C-T	MYBPC3	1		B	-	-
11-47350047-C-T	MYBPC3	1		B	-	+
11-47351296-A-T	MYBPC3	1	PS3		+	-
11-47351449-C-T	MYBPC3	1		B	-	+
11-47441875-G-A	RAPSN	1		P	-	+
11-47442732-C-T	RAPSN	1		B	-	+
11-47447904-C-T	RAPSN	1	PS3	P	+	+
11-47448079-G-T	RAPSN	1	PS3		+	-
11-47448102-A-G	RAPSN	1		B	-	+
11-47448793-G-A	RAPSN	1		B	-	+
11-47448832-C-T	RAPSN	1	PS3	P	+	+
11-47582436-C-T	NDUFS3	1	PS3		+	-
1-147908019-G-A	GJA8	1		P	-	+
1-147908133-G-A	GJA8	1		P	-	+
1-147908218-C-A	GJA8	1		P	-	-
1-147908218-C-T	GJA8	1		P	-	+
1-147908613-A-G	GJA8	1		B	-	+
1-147908696-T-G	GJA8	1		B	-	+
1-147908848-A-G	GJA8	1		B	-	+
1-147909057-G-C	GJA8	1		B	-	+
1-150072183-T-G	VPS45	1		B	-	-
1-150081366-G-A	VPS45	1		P	-	+
1-150335182-A-G	PRPF3	1		B	-	+
1-150343371-C-G	PRPF3	1		P	-	+
1-150343433-G-A	PRPF3	1		B	-	+
1-150344212-C-T	PRPF3	1	PS3	P	+	+
1-150344216-C-T	PRPF3	1		P	-	-
1-150349210-G-C	PRPF3	1		B	-	+
1-150509669-G-A	ECM1	1		B	-	+
1-150511554-G-A	ECM1	1		P	-	+
1-150558602-A-G	ADAMTSL4	1		B	-	-
1-150558996-G-A	ADAMTSL4	1		P	-	+
1-150796855-G-C	CTSK	1		P	-	-
1-150806798-C-T	CTSK	1		B	-	+
1-151017816-C-T	PRUNE1	1		B	-	+
1-151018650-G-A	PRUNE1	1		P	-	+
1-151024679-G-A	PRUNE1	1		B	-	+
1-151033930-C-G	PRUNE1	1		B	-	+
1-1512287-A-G	ATAD3A	1		B	-	+
1-151365622-G-A	SELENBP1	1	PS3		+	-
1-151366445-C-A	SELENBP1	1	PS3		+	-
1-151405917-C-T	POGZ	1	PS3	P	+	+
1-151427829-T-C	POGZ	1		B	-	+
1-1520272-G-T	ATAD3A	1		B	-	+
11-5225605-T-C	HBB	1	PS3	P	+	+
11-5225606-A-G	HBB	1	PS3		+	-
11-5225606-A-T	HBB	1	PS3		+	-
11-5225611-T-C	HBB	1	PS3		+	-
11-5225611-T-G	HBB	1	PS3		+	-
11-5225612-G-A	HBB	1		B	-	+
11-5225620-G-A	HBB	1	PS3		+	-
6-110815068-T-A	CDK19	0.000198467	Proxy Benign		+	-
11-5225662-A-C	HBB	1	PS3		+	-
11-5225678-C-G	HBB	1	PS3		+	-
11-5225714-C-G	HBB	1	PS3		+	-
11-5225714-C-T	HBB	1	PS3		+	-
11-5226597-C-T	HBB	1		P	-	+
11-5226598-G-C	HBB	1	PS3	P	+	+
11-5226630-T-G	HBB	1		B	-	+
11-5226764-A-G	HBB	1	PS3		+	-
11-5226789-C-A	HBB	1	PS3		+	-
11-5226961-C-T	HBB	1	PS3		+	-
11-5226999-T-C	HBB	1		B	-	+
6-110815011-A-T	CDK19	0.000244526	Proxy Benign		+	-
11-5227003-C-T	HBB	1	PS3		+	-
1-1525242-T-G	ATAD3A	1	PS3		+	-
1-1527718-A-G	ATAD3A	1		P	-	+
1-1529299-C-T	ATAD3A	1	PS3	P	-	+
11-532686-G-A	HRAS	1		B	-	+
1-1535372-G-A	TMEM240	1		P	-	+
1-1535427-C-T	TMEM240	1		B	-	+
1-154172972-G-A	TPM3	1	PS3	P	+	+
1-154172972-G-C	TPM3	1	PS3		+	-
1-154191927-T-G	TPM3	1		B	-	+
1-154569474-C-T	CHRNB2	1		B	-	+
1-154569502-T-A	CHRNB2	1		B	-	+
1-154571682-G-A	CHRNB2	1	PS3	P	+	+
1-154571682-G-T	CHRNB2	1		P	-	+
1-154571746-T-C	CHRNB2	1	PS3	P	+	+
11-112230632-C-T	PTS	0.000253195	Proxy Benign		+	-
1-154585296-T-G	ADAR	1		P	-	+
1-154585836-G-A	ADAR	1		P	-	+
1-154601491-T-C	ADAR	1		B	-	-
1-154602344-T-C	ADAR	1		B	-	+
1-15461640-C-T	CELA2A	1	PS3		+	-
1-154988372-G-A	FLAD1	1		B	-	-
1-154992746-C-T	FLAD1	1	PS3	P	+	+
1-155237453-C-T	GBA1	1	PS3	P	+	+
1-155237495-C-T	GBA1	1	PS3		+	-
1-155238588-T-C	GBA1	1	PS3		+	-
1-155238608-T-A	GBA1	1	PS3		-	-
1-155239716-C-G	GBA1	1	PS3		+	-
1-155240687-T-C	GBA1	1		B	-	+
1-155240707-T-C	GBA1	1		B	-	+
1-155291845-C-T	PKLR	1	PS3		+	-
1-155295208-C-A	PKLR	1	PS3		+	-
1-155610262-C-T	MSTO1	1		B	-	+
1-155610461-C-A	MSTO1	1		B	-	-
1-155612209-G-C	MSTO1	1		P	-	+
1-155612440-G-A	MSTO1	1		P	-	+
1-155612848-C-T	MSTO1	1		P	-	+
1-155614146-A-G	MSTO1	1		B	-	+
1-155904375-C-A	RIT1	1	PS3		+	-
1-155904456-C-G	RIT1	1	PS3		-	-
1-155904470-C-G	RIT1	1	PS3		+	-
1-155904470-C-T	RIT1	1	PS3		+	-
1-155904472-T-C	RIT1	1	PS3		+	-
1-155904475-A-G	RIT1	1	PS3		+	-
1-155904481-C-G	RIT1	1	PS3		-	-
1-155904493-T-G	RIT1	1	PS3		+	-
1-155904494-A-C	RIT1	1	PS3		+	-
1-155904494-A-T	RIT1	1	PS3		+	-
1-155904496-A-C	RIT1	1	PS3		+	-
1-155904498-T-C	RIT1	1	PS3		+	-
1-155904739-C-A	RIT1	1	PS3		+	-
1-155904739-C-G	RIT1	1	PS3		+	-
1-155904739-C-T	RIT1	1	PS3		+	-
1-155904798-G-C	RIT1	1	PS3		+	-
1-155910658-C-G	RIT1	1	PS3		+	-
1-155910693-T-G	RIT1	1	PS3		+	-
1-156114947-C-T	LMNA	1	PS3		+	-
1-156115061-G-C	LMNA	1	PS3		-	-
1-156115162-G-A	LMNA	1	PS3		+	-
1-156130687-T-C	LMNA	1	PS3		+	-
1-156130741-G-A	LMNA	1	PS3		+	-
1-156130757-G-C	LMNA	1	PS3	P	+	+
1-156134457-C-T	LMNA	1	PS3		+	-
1-156134458-G-A	LMNA	1	PS3		+	-
1-156134461-T-G	LMNA	1		B	-	-
1-156134474-C-G	LMNA	1	PS3		+	-
1-156134496-G-A	LMNA	1	PS3		+	-
1-156134811-C-T	LMNA	1	PS3		+	-
1-156134821-A-C	LMNA	1	PS3		+	-
1-156134910-C-T	LMNA	1	PS3		+	-
1-156135247-G-A	LMNA	1	PS3		+	-
1-156135274-G-A	LMNA	1	PS3		+	-
1-156135956-G-A	LMNA	1	PS3		+	-
1-156135967-C-T	LMNA	1	PS3		+	-
1-156136036-G-A	LMNA	1	PS3		+	-
1-156136094-G-T	LMNA	1	PS3		+	-
1-156136413-C-T	LMNA	1	PS3		+	-
1-156136984-C-T	LMNA	1	PS3		+	-
1-156137666-C-T	LMNA	1	PS3		+	-
1-156137667-G-A	LMNA	1	PS3		+	-
1-156860987-G-A	NTRK1	1		B	-	+
1-156864395-G-A	NTRK1	1		B	-	+
1-156868180-G-A	NTRK1	1		B	-	+
1-156868568-T-C	NTRK1	1		P	-	+
1-156868640-C-T	NTRK1	1		B	-	+
1-156879126-C-T	NTRK1	1		B	-	+
1-156879154-G-T	NTRK1	1		B	-	+
1-156879261-C-T	NTRK1	1	PS3	P	+	+
1-156879276-C-T	NTRK1	1		P	-	+
1-156880092-G-A	NTRK1	1		P	-	+
1-156880122-G-A	NTRK1	1		P	-	+
1-156881562-C-T	NTRK1	1	PS3	P	+	+
11-57598271-A-G	SERPING1	1		P	-	-
11-57599969-A-G	SERPING1	1		B	-	+
11-57599994-T-C	SERPING1	1		B	-	+
11-57599996-G-A	SERPING1	1		B	-	+
11-57600111-C-T	SERPING1	1		B	-	+
11-57600179-A-G	SERPING1	1		B	-	-
11-57606076-T-C	SERPING1	1		P	-	+
11-57611874-T-G	SERPING1	1	PS3		+	-
11-57611880-T-C	SERPING1	1		P	-	+
11-57614474-C-T	SERPING1	1		P	-	+
11-57614495-G-A	SERPING1	1		P	-	+
11-57614507-T-C	SERPING1	1		P	-	+
11-57614516-G-A	SERPING1	1		B	-	+
11-57659895-G-A	CLP1	1	PS3		+	-
1-158614301-A-G	SPTA1	1		B	-	+
1-158615332-T-G	SPTA1	1		B	-	+
1-158623057-G-A	SPTA1	1		B	-	+
1-158634601-T-C	SPTA1	1		B	-	+
1-158642942-G-A	SPTA1	1		B	-	+
16-8804832-T-A	PMM2	0.000450999	Proxy Benign		+	-
1-158678434-A-G	SPTA1	1	PS3	P	+	+
1-158685289-C-A	SPTA1	1	PS3	P	+	+
1-158685289-C-T	SPTA1	1	PS3	P	+	+
1-158685290-G-A	SPTA1	1	PS3	P	+	+
1-158685290-G-T	SPTA1	1	PS3	P	+	+
11-59125451-G-A	FAM111B	1		B	-	+
11-59125983-T-G	FAM111B	1		P	-	+
11-59152848-G-A	FAM111A	1		B	-	+
11-59153374-G-A	FAM111A	1		P	-	+
11-59843888-C-T	CBLIF	1		B	-	+
11-59843998-G-A	CBLIF	1		P	-	+
1-160041722-G-A	KCNJ10	1		B	-	+
1-160041907-A-G	KCNJ10	1	PS3		-	-
1-160042033-G-A	KCNJ10	1	PS3	P	+	+
1-160120918-T-A	ATP1A2	1		B	-	+
1-160127591-C-T	ATP1A2	1		P	-	+
1-160128761-C-T	ATP1A2	1	PS3		+	-
1-160128782-G-A	ATP1A2	1		P	-	+
1-160129354-A-G	ATP1A2	1		B	-	+
1-160130141-G-A	ATP1A2	1		B	-	+
1-160130282-C-T	ATP1A2	1		P	-	+
1-160130283-G-A	ATP1A2	1	PS3		+	-
1-160130505-A-G	ATP1A2	1		B	-	+
1-160130586-G-A	ATP1A2	1	PS3	P	+	+
1-160134538-G-A	ATP1A2	1	PS3	P	+	+
1-160134595-A-G	ATP1A2	1		B	-	+
1-160135246-G-A	ATP1A2	1	PS3		+	-
1-160135591-G-C	ATP1A2	1		B	-	-
1-160135890-G-A	ATP1A2	1	PS3		+	-
1-160135992-T-A	ATP1A2	1		P	-	+
1-160136570-G-A	ATP1A2	1		P	-	+
1-160136642-G-A	ATP1A2	1		B	-	-
1-160136914-G-A	ATP1A2	1	PS3		+	-
1-160139735-C-T	ATP1A2	1	PS3		+	-
6-7542022-G-A	DSP	0.000858827	Proxy Benign		+	-
1-160201339-T-C	CASQ1	1	PS3		+	-
1-160291829-C-A	COPA	1		B	-	+
1-160293391-T-C	COPA	1		B	-	+
1-160314111-C-T	COPA	1		P	-	+
1-160323439-C-T	COPA	1	PS3	P	+	+
1-16044504-T-G	CLCNKB	1		B	-	+
1-16044572-G-T	CLCNKB	1		B	-	+
7-155802990-G-C	SHH	0.00151305	Proxy Benign		-	-
1-16048352-G-A	CLCNKB	1		P	-	+
1-16048537-G-A	CLCNKB	1	PS3	P	+	+
1-16048568-C-G	CLCNKB	1		B	-	+
1-16049696-C-T	CLCNKB	1		B	-	+
1-16051505-A-G	CLCNKB	1		B	-	+
1-16051721-G-A	CLCNKB	1		P	-	+
1-16051724-C-T	CLCNKB	1		P	-	+
1-16051725-G-A	CLCNKB	1		P	-	+
1-161212418-C-G	NDUFS2	1		B	-	+
1-161213673-T-C	NDUFS2	1		P	-	+
1-161306426-C-G	MPZ	1	PS3		+	-
1-161306785-G-A	MPZ	1	PS3		+	-
1-161306863-C-T	MPZ	1	PS3		+	-
1-161306864-G-A	MPZ	1	PS3		+	-
1-161306914-T-C	MPZ	1	PS3		+	-
1-161307304-G-C	MPZ	1	PS3		+	-
1-161307376-T-G	MPZ	1	PS3		+	-
1-161307386-T-A	MPZ	1	PS3		+	-
11-61345352-G-A	TKFC	1	PS3		+	-
1-161356814-C-T	SDHC	1	PS3		+	-
11-61393965-G-T	TMEM216	1	PS3		+	-
11-61437685-C-T	SDHAF2	1		B	-	+
11-61437820-G-A	SDHAF2	1	PS3	P	+	+
1-161766407-G-T	ATF6	1		B	-	+
11-61779285-T-C	MYRF	1	PS3		-	-
1-161819693-C-T	ATF6	1	PS3	P	+	+
11-61951811-C-G	BEST1	1		P	-	+
11-61955192-T-A	BEST1	1		P	-	+
11-61955756-C-G	BEST1	1		P	-	+
11-61955892-G-A	BEST1	1	PS3		+	-
11-61955924-C-G	BEST1	1	PS3		+	-
11-61956966-C-T	BEST1	1	PS3		+	-
11-61956981-C-A	BEST1	1		B	-	+
11-61957402-C-T	BEST1	1	PS3		+	-
11-61957403-G-A	BEST1	1	PS3		+	-
11-61957429-T-A	BEST1	1	PS3		+	-
11-61959564-G-A	BEST1	1	PS3		+	-
11-61962628-G-A	BEST1	1		B	-	+
11-61962853-C-T	BEST1	1		B	-	+
11-62616643-C-T	B3GAT3	1		B	-	+
11-62616744-A-T	B3GAT3	1	PS3		+	-
11-62621947-T-A	B3GAT3	1		P	-	+
11-62626633-G-A	GANAB	1		P	-	+
11-62626904-G-T	GANAB	1		B	-	+
11-62702493-G-A	BSCL2	1	PS3	P	+	+
11-62705572-C-T	BSCL2	1		B	-	-
11-62707136-G-C	BSCL2	1		B	-	+
1-163336784-T-G	NUF2	1	PS3		+	-
11-6390697-G-A	SMPD1	1		B	-	+
11-6390705-T-C	SMPD1	1		B	-	+
11-6390851-G-A	SMPD1	1		B	-	+
11-6391622-C-T	SMPD1	1		P	-	+
11-6391624-C-T	SMPD1	1		B	-	+
11-6391732-T-G	SMPD1	1		P	-	+
11-6391753-C-T	SMPD1	1		P	-	-
11-6391784-G-A	SMPD1	1		B	-	+
11-6391804-G-A	SMPD1	1	PS3		+	-
11-6391813-A-C	SMPD1	1	PS3		+	-
11-6391822-G-C	SMPD1	1	PS3		+	-
11-6391904-A-C	SMPD1	1		P	-	+
11-6391966-G-A	SMPD1	1		B	-	+
11-6393276-G-A	SMPD1	1		P	-	+
11-6393620-C-T	SMPD1	1	PS3		+	-
11-6393650-T-C	SMPD1	1		P	-	+
11-6393898-A-G	SMPD1	1		P	-	+
11-6393981-C-T	SMPD1	1		P	-	+
11-6393985-C-T	SMPD1	1		P	-	+
11-6394006-C-A	SMPD1	1	PS3		-	-
11-6394203-C-T	SMPD1	1	PS3		+	-
11-6394204-G-A	SMPD1	1	PS3		+	-
11-6394233-G-A	SMPD1	1		B	-	+
11-6394245-G-A	SMPD1	1		B	-	+
11-6394336-G-A	SMPD1	1		B	-	+
11-6394474-C-T	SMPD1	1		B	-	-
11-6394494-C-G	SMPD1	1	PS3	P	+	+
11-64297507-C-A	KCNK4	1		P	-	+
11-64297629-G-A	KCNK4	1		B	-	+
11-644568-C-G	DEAF1	1		B	-	+
11-644614-G-C	DEAF1	1		B	-	+
1-164559883-G-A	PBX1	1		B	-	+
11-64591825-G-A	SLC22A12	1	PS3		+	-
11-64730141-G-C	RASGRP2	1		B	-	+
11-64736934-C-T	RASGRP2	1		P	-	+
11-64746796-A-G	PYGM	1		P	-	+
11-64746796-A-T	PYGM	1		P	-	+
11-64750471-G-T	PYGM	1	PS3		+	-
11-64750544-G-A	PYGM	1		B	-	+
11-64751983-C-T	PYGM	1		P	-	+
11-64753583-T-G	PYGM	1		B	-	-
11-64753682-G-C	PYGM	1		B	-	+
11-64753934-G-A	PYGM	1		B	-	+
11-64753971-C-T	PYGM	1		P	-	+
11-64754335-T-C	PYGM	1		P	-	-
11-64757826-C-T	PYGM	1	PS3		-	-
11-64757862-C-A	PYGM	1		B	-	+
1-164799889-G-C	PBX1	1	PS3		+	-
11-64804503-C-T	MEN1	1	PS3		+	-
11-64804546-T-C	MEN1	1		B	-	+
11-64804557-A-C	MEN1	1		B	-	+
11-64804627-G-A	MEN1	1		B	-	+
11-64804659-C-T	MEN1	1		B	-	+
11-64805076-C-A	MEN1	1	PS3		+	-
11-64805078-A-G	MEN1	1	PS3		+	-
11-64805078-A-T	MEN1	1	PS3		+	-
11-64805117-A-G	MEN1	1	PS3		+	-
11-64805132-C-T	MEN1	1	PS3		+	-
11-64805769-A-T	MEN1	1	PS3		+	-
11-64806322-G-A	MEN1	1	PS3		+	-
11-64806332-G-A	MEN1	1	PS3		+	-
11-64808019-C-G	MEN1	1	PS3	P	+	+
11-64808030-T-A	MEN1	1		P	-	+
11-64808079-C-A	MEN1	1	PS3		+	-
11-64809997-G-A	MEN1	1		P	-	+
11-64810034-C-T	MEN1	1		P	-	+
11-64810045-A-C	MEN1	1	PS3		+	-
1-164812015-G-A	PBX1	1		P	-	+
11-6502917-G-A	DNHD1	1	PS3		+	-
11-6546499-C-T	DNHD1	1	PS3		+	-
11-65868522-G-A	EFEMP2	1	PS3		+	-
11-65868582-T-C	EFEMP2	1		B	-	+
11-65869976-T-G	EFEMP2	1	PS3	P	+	+
11-65870650-C-T	EFEMP2	1	PS3	P	+	+
11-65871247-C-T	EFEMP2	1		B	-	-
11-66070692-C-T	PACS1	1		B	-	+
11-6615172-G-A	TPP1	1	PS3	P	+	+
11-6615200-C-T	TPP1	1		B	-	+
11-6615455-C-T	TPP1	1		B	-	+
11-6615542-C-T	TPP1	1	PS3		+	-
11-6616033-G-C	TPP1	1		B	-	+
11-6616056-C-T	TPP1	1	PS3		+	-
11-6616057-A-G	TPP1	1	PS3	P	+	+
11-6616357-T-G	TPP1	1		B	-	+
11-6616378-G-C	TPP1	1	PS3		+	-
11-6616690-T-C	TPP1	1		P	-	+
11-6616696-C-A	TPP1	1		P	-	+
11-6616718-C-T	TPP1	1	PS3		+	-
11-6616720-T-A	TPP1	1		P	-	+
11-6617046-G-A	TPP1	1		P	-	+
11-6617707-T-C	TPP1	1		B	-	+
11-6618820-G-A	TPP1	1		B	-	+
11-66211206-C-T	PACS1	1	PS3	P	+	+
11-6625356-G-A	DCHS1	1	PS3	P	+	-
11-6639939-C-A	DCHS1	1		B	-	+
11-66510660-A-T	BBS1	1		P	-	+
11-66519725-G-A	BBS1	1		B	-	+
11-66523808-G-A	BBS1	1		B	-	+
11-66523869-T-A	BBS1	1	PS3	P	+	+
11-66526181-T-G	BBS1	1	PS3	P	+	+
11-66529828-G-A	BBS1	1		B	-	+
11-66688068-C-T	SPTBN2	1		B	-	+
11-66693406-G-A	SPTBN2	1		B	-	+
11-66694195-G-A	SPTBN2	1		B	-	-
11-66700998-A-G	SPTBN2	1		B	-	+
11-66708181-C-T	SPTBN2	1		P	-	+
11-66708182-G-A	SPTBN2	1		P	-	+
11-66708184-A-G	SPTBN2	1		P	-	+
11-66715958-T-C	SPTBN2	1		P	-	+
11-66849306-G-C	PC	1		B	-	+
11-66851880-C-T	PC	1		P	-	+
11-67483230-G-C	AIP	1		B	-	+
11-67490352-C-A	AIP	1		B	-	+
11-67490383-G-A	AIP	1	PS3	P	+	+
11-67490804-C-A	AIP	1		P	-	+
11-67608552-G-T	NDUFV1	1		B	-	+
11-67609474-G-A	NDUFV1	1		P	-	+
11-67610487-G-A	NDUFV1	1	PS3		+	-
11-67610510-G-A	NDUFV1	1	PS3		+	-
11-67611972-C-T	NDUFV1	1	PS3		+	-
11-67611973-G-A	NDUFV1	1	PS3		+	-
11-67612225-C-T	NDUFV1	1	PS3		+	-
11-678798-G-A	DEAF1	1		B	-	+
11-68041789-G-C	TCIRG1	1		B	-	+
11-68041801-C-T	TCIRG1	1		B	-	+
11-68043478-C-T	TCIRG1	1		B	-	+
11-68047480-G-C	TCIRG1	1		P	-	+
11-68047672-G-T	TCIRG1	1		P	-	+
11-68047967-G-A	TCIRG1	1		P	-	+
11-68049122-C-T	TCIRG1	1		B	-	+
11-68050574-C-G	TCIRG1	1		P	-	+
11-681025-G-C	DEAF1	1		B	-	+
11-68312715-A-G	LRP5	1		P	-	+
11-68312730-C-A	LRP5	1		B	-	+
11-68348021-A-G	LRP5	1		B	-	+
11-68357673-G-T	LRP5	1		P	-	+
16-88814460-C-G	GALNS	0.00161324	Proxy Benign		+	-
11-68357754-A-G	LRP5	1		P	-	+
11-68363784-G-A	LRP5	1	PS3	P	+	+
11-68386358-G-A	LRP5	1		P	-	+
11-68386621-G-A	LRP5	1		P	-	+
11-68389948-C-T	LRP5	1		P	-	+
11-68389949-G-A	LRP5	1	PS3	P	+	+
11-68389964-A-G	LRP5	1		B	-	+
11-68413740-C-T	LRP5	1		P	-	+
11-68425121-A-G	LRP5	1		B	-	+
11-68426037-C-T	LRP5	1		B	-	+
11-68426112-C-T	LRP5	1		P	-	+
11-68433827-C-T	LRP5	1		B	-	+
11-68438490-G-A	LRP5	1		B	-	+
11-68438631-G-A	LRP5	0.460836		B	-	+
11-68446521-C-T	LRP5	1		B	-	-
11-684926-C-G	DEAF1	1		P	-	+
11-686914-T-C	DEAF1	1		P	-	+
11-686925-C-G	DEAF1	1	PS3	P	+	+
11-686935-T-C	DEAF1	1		B	-	+
11-686956-T-C	DEAF1	1	PS3		+	-
11-686986-G-A	DEAF1	1		P	-	+
11-686992-G-A	DEAF1	1	PS3	P	+	+
11-68760238-C-T	CPT1A	1		P	-	+
11-68762652-C-T	CPT1A	1		B	-	+
11-68775362-G-A	CPT1A	1		B	-	+
11-68780662-G-A	CPT1A	1	PS3	P	+	+
11-68780734-T-G	CPT1A	1		P	-	+
11-68781882-G-A	CPT1A	1		P	-	+
11-68781939-C-G	CPT1A	1		P	-	+
11-68784909-G-A	CPT1A	1		P	-	+
11-68784923-C-T	CPT1A	1		B	-	+
11-687941-C-T	DEAF1	1	PS3		+	-
11-68794820-C-T	CPT1A	1		B	-	+
11-68794860-C-T	CPT1A	1		B	-	+
11-68804037-C-T	CPT1A	1		B	-	-
11-68807618-G-A	CPT1A	1		B	-	+
11-68812551-G-A	CPT1A	1		P	-	+
11-68903954-T-C	IGHMBP2	1		P	-	-
11-68906133-C-G	IGHMBP2	1		B	-	+
11-68906205-G-A	IGHMBP2	1		B	-	+
16-88814516-G-A	GALNS	0.00181726	Proxy Benign		+	-
11-68908250-C-T	IGHMBP2	1		B	-	+
11-68911494-T-C	IGHMBP2	1		B	-	+
11-68911530-A-G	IGHMBP2	1		P	-	+
11-68914902-G-T	IGHMBP2	1		P	-	+
11-68914934-A-G	IGHMBP2	1		B	-	+
11-68929204-T-C	IGHMBP2	1	PS3	P	+	+
11-68929248-G-A	IGHMBP2	1		P	-	+
11-68929266-G-A	IGHMBP2	1	PS3	P	+	+
11-68929320-G-A	IGHMBP2	1		P	-	+
11-68933336-C-T	IGHMBP2	1		P	-	+
11-68933357-G-A	IGHMBP2	1		B	-	+
11-68933854-C-T	IGHMBP2	1		P	-	-
11-68934466-G-A	IGHMBP2	1		P	-	+
11-68934542-C-T	IGHMBP2	1		P	-	+
11-68935359-G-A	IGHMBP2	1		P	-	+
11-68935403-C-A	IGHMBP2	1		P	-	+
11-68935404-G-A	IGHMBP2	1	PS3	P	+	+
11-68936419-G-A	IGHMBP2	1		B	-	+
11-68936491-A-G	IGHMBP2	1		B	-	+
11-68936560-C-T	IGHMBP2	1		B	-	+
11-68936947-C-T	IGHMBP2	1		B	-	-
11-68938206-C-A	IGHMBP2	1		B	-	+
11-68938352-G-A	IGHMBP2	1		B	-	+
11-68939585-C-T	IGHMBP2	1		B	-	+
1-169468154-A-G	SLC19A2	1		B	-	+
1-169468774-T-A	SLC19A2	1		B	-	+
1-169477447-C-T	SLC19A2	1		P	-	+
1-169477648-C-T	SLC19A2	1		P	-	+
1-169514323-T-C	F5	1		B	-	+
1-169530805-T-C	F5	1	PS3	P	+	-
1-169541237-G-T	F5	1		B	-	+
1-169542640-T-G	F5	1		B	-	+
1-169552595-C-A	F5	1		P	-	-
1-169556687-C-T	F5	1		P	-	+
11-69816341-C-G	FGF3	1		B	-	+
11-69816361-G-A	FGF3	1		P	-	+
1-16986291-C-T	ATP13A2	1		B	-	+
1-16996008-C-G	ATP13A2	1		P	-	+
1-17022627-C-T	SDHB	1	PS3		-	-
1-17022648-C-T	SDHB	1	PS3		+	-
1-17022649-G-A	SDHB	1	PS3		-	-
1-17022649-G-T	SDHB	1	PS3	P	-	+
1-17022685-G-A	SDHB	1	PS3		+	-
1-17022724-G-A	SDHB	1	PS3		+	-
1-17023992-C-T	SDHB	1	PS3		+	-
1-17024015-C-A	SDHB	1	PS3		+	-
1-17024028-C-T	SDHB	1	PS3		+	-
1-17024041-A-G	SDHB	1	PS3		+	-
1-17024043-C-T	SDHB	1	PS3		+	-
1-17028605-C-A	SDHB	1	PS3		+	-
1-17044791-T-C	SDHB	1		B	-	+
1-17044803-C-T	SDHB	1		B	-	+
1-17044824-C-A	SDHB	1	PS3	P	+	+
1-17044824-C-T	SDHB	1	PS3		+	-
1-17044825-G-C	SDHB	1	PS3		+	-
1-17044834-C-G	SDHB	1	PS3	P	+	+
1-17054012-G-C	SDHB	1		B	-	+
1-171107825-G-A	FMO3	1		B	-	+
1-171108178-C-T	FMO3	1	PS3		+	-
7-155803393-A-G	SHH	0.00270338	Proxy Benign		+	-
1-171117317-C-T	FMO3	1	PS3	P	+	+
11-71435461-C-T	DHCR7	1	PS3		+	-
11-71435466-C-T	DHCR7	1	PS3		+	-
11-71435575-C-G	DHCR7	1	PS3		+	-
11-71435575-C-T	DHCR7	1	PS3		+	-
11-71435593-G-A	DHCR7	1	PS3		+	-
11-71435664-C-T	DHCR7	1	PS3		-	-
11-71435665-A-G	DHCR7	1	PS3		+	-
11-71435749-G-A	DHCR7	1	PS3		+	-
11-71437909-G-A	DHCR7	1	PS3		+	-
11-71437934-C-T	DHCR7	1	PS3	P	-	+
11-71438970-G-A	DHCR7	1	PS3		+	-
11-71438985-C-T	DHCR7	1	PS3		+	-
11-71438986-G-A	DHCR7	1	PS3		-	-
11-71441267-T-C	DHCR7	1		B	-	+
11-71441392-G-A	DHCR7	1	PS3		+	-
11-71441420-T-G	DHCR7	1		P	-	+
11-71444928-T-A	DHCR7	1		B	-	+
11-71473342-G-A	NADSYN1	1		P	-	+
11-71473632-A-C	NADSYN1	1		B	-	+
11-71491856-G-A	NADSYN1	1		P	-	+
11-71497491-G-A	NADSYN1	1		B	-	+
1-171635941-T-C	MYOC	1		B	-	+
1-171635945-T-A	MYOC	1	PS3	P	+	+
1-171635998-G-A	MYOC	1	PS3	P	+	+
1-171636000-G-C	MYOC	1		P	-	+
1-171636000-G-T	MYOC	1	PS3	P	+	+
1-171636010-A-T	MYOC	1	PS3	P	+	+
1-171636092-T-A	MYOC	1		P	-	+
X-154031185-T-C	MECP2	0.0182849	Proxy Benign		+	-
1-171636131-A-G	MYOC	1	PS3		+	-
1-171636143-A-G	MYOC	1	PS3	P	-	-
1-171636164-C-A	MYOC	1	PS3	P	+	+
1-171636173-T-C	MYOC	1	PS3		+	-
X-154031052-G-A	MECP2	0.018299	Proxy Benign		+	-
1-171636290-C-T	MYOC	1	PS3	P	+	+
1-171636301-T-G	MYOC	1	PS3	P	+	+
1-171636302-C-A	MYOC	1	PS3	P	+	-
1-171636302-C-G	MYOC	1	PS3		-	-
1-171636310-G-A	MYOC	1		P	-	+
1-171636331-G-A	MYOC	1	PS3	P	+	+
1-171636341-C-T	MYOC	1	PS3	P	+	+
1-171636349-C-A	MYOC	1	PS3		+	-
1-171636353-C-T	MYOC	1	PS3		+	-
X-71224423-T-C	GJB1	0.0183262	Proxy Benign		+	-
X-134460315-G-T	HPRT1	0.0211136	Proxy Benign		+	-
1-45500366-A-G	MMACHC	0.0455956	Proxy Benign		+	-
1-171636464-C-G	MYOC	1	PS3	P	+	+
1-171636473-C-T	MYOC	1	PS3	P	+	+
16-89738949-T-C	FANCA	0.0455956	Proxy Benign		+	-
1-171636679-G-A	MYOC	1	PS3	P	+	+
1-171636686-C-T	MYOC	1	PS3	P	+	+
1-171636688-A-G	MYOC	1		P	-	+
1-171638683-A-G	MYOC	1		B	-	+
1-229431600-C-T	ACTA1	0.0455956	Proxy Benign		+	-
13-20189311-C-G	GJB2	0.0455956	Proxy Benign		+	-
1-171652172-C-T	MYOC	1		B	-	+
13-20189325-G-A	GJB2	0.0455956	Proxy Benign		+	-
15-40418201-G-C	IVD	0.0455956	Proxy Benign		+	-
9-34647519-C-G	GALT	0.0455956	Proxy Benign		+	-
1-171652458-T-C	MYOC	1		B	-	+
9-34647909-A-G	GALT	0.0455956	Proxy Benign		-	-
1-171652514-C-T	MYOC	1		B	-	+
9-34647916-G-A	GALT	0.0455956	Proxy Benign		+	-
9-34647927-C-G	GALT	0.0455956	Proxy Benign		+	-
11-72106094-G-A	TOMT	1		P	-	+
11-72108672-G-A	TOMT	1		B	-	+
11-72195394-C-T	FOLR1	1		B	-	+
11-72195627-C-T	FOLR1	1		P	-	+
11-72293408-G-A	CLPB	1		B	-	+
11-72294417-C-T	CLPB	1		P	-	+
11-72302339-T-C	CLPB	1	PS3	P	+	+
11-72434126-C-A	CLPB	1		B	-	+
1-17262194-T-A	PADI3	1	PS3		+	-
1-17270928-C-T	PADI3	1	PS3		+	-
1-173826731-C-G	DARS2	1		P	-	+
1-173831593-G-T	DARS2	1	PS3	P	+	+
1-173833419-G-A	DARS2	1		P	-	+
1-173833463-G-A	DARS2	1		B	-	+
1-173833470-A-G	DARS2	1		B	-	+
1-173853456-C-G	DARS2	1	PS3		+	-
1-173853873-C-A	DARS2	1		B	-	+
1-173903918-C-G	SERPINC1	1		P	-	+
1-173904011-G-A	SERPINC1	1		P	-	+
1-173904038-C-G	SERPINC1	1		P	-	+
1-173907511-A-G	SERPINC1	1		P	-	+
9-34647929-G-A	GALT	0.0455956	Proxy Benign		-	-
1-173909824-C-T	SERPINC1	1		B	-	+
1-173909848-T-G	SERPINC1	1		P	-	+
9-34647945-A-G	GALT	0.0455956	Proxy Benign		+	-
1-173911870-T-C	SERPINC1	1		B	-	+
1-173911974-T-G	SERPINC1	1		P	-	+
1-173911984-T-C	SERPINC1	1		P	-	+
1-173914662-T-C	SERPINC1	1		B	-	+
1-173914743-G-A	SERPINC1	1	PS3		+	-
1-173914914-A-G	SERPINC1	1		B	-	+
1-173917231-G-T	SERPINC1	1		B	-	+
11-74492263-T-A	LIPT2	1		B	-	+
11-74493390-A-C	LIPT2	1	PS3	P	+	+
11-74493615-A-G	LIPT2	1	PS3		+	-
11-763456-C-T	TALDO1	1		P	-	+
11-764414-A-G	TALDO1	1		B	-	+
11-77084938-C-T	CAPN5	1		B	-	+
11-77115560-C-T	CAPN5	1	PS3	P	+	+
11-77130635-A-G	MYO7A	1		P	-	-
11-77142737-T-C	MYO7A	1		B	-	+
11-77142767-C-A	MYO7A	1		P	-	+
11-77156022-T-A	MYO7A	1		P	-	-
11-77156990-C-T	MYO7A	1		P	-	+
11-77156991-G-A	MYO7A	1		P	-	-
11-77157000-G-C	MYO7A	1	PS3		+	-
9-34649447-C-A	GALT	0.0455956	Proxy Benign		+	-
11-77159450-G-A	MYO7A	1		B	-	+
11-77174855-G-A	MYO7A	1		B	-	+
11-77177597-G-A	MYO7A	1		B	-	+
11-77179924-C-T	MYO7A	1		P	-	-
11-77179925-G-A	MYO7A	1		P	-	+
11-77184715-G-A	MYO7A	1	PS3		+	-
11-77189348-G-A	MYO7A	1		P	-	+
11-77189386-C-A	MYO7A	1		P	-	+
11-77190117-C-T	MYO7A	1		P	-	+
11-77199555-C-T	MYO7A	1		B	-	+
11-77199663-C-T	MYO7A	1		B	-	+
11-77199771-G-A	MYO7A	1		B	-	+
11-77201591-A-T	MYO7A	1		B	-	+
11-77202412-A-G	MYO7A	1		B	-	+
11-77203215-T-C	MYO7A	1		B	-	+
11-77205598-C-T	MYO7A	1		P	-	+
11-77206107-C-T	MYO7A	1		P	-	+
11-77206120-C-T	MYO7A	1		P	-	+
11-77208433-C-A	MYO7A	1		B	-	+
11-77213021-G-A	MYO7A	1		B	-	+
11-77213908-G-A	MYO7A	1	PS3		+	-
11-77213972-C-T	MYO7A	1		P	-	+
11-77214688-G-A	MYO7A	1		B	-	+
11-77379318-G-A	PAK1	1	PS3		+	-
11-78112652-A-G	ALG8	1		B	-	+
11-78112692-A-C	ALG8	1		P	-	+
1-1790438-C-T	GNB1	1		B	-	+
11-792429-G-A	SLC25A22	1	PS3	P	+	+
11-794491-C-T	SLC25A22	1		B	-	+
1-179551435-G-A	NPHS2	1	PS3		+	-
1-179552605-G-A	NPHS2	1	PS3		+	-
1-179554491-A-T	NPHS2	1	PS3		+	-
1-179559707-A-G	NPHS2	1		P	-	+
1-179559710-C-T	NPHS2	1	PS3		+	-
1-179559711-G-A	NPHS2	1		P	-	+
1-179575683-G-A	NPHS2	1		B	-	+
1-179575741-C-T	NPHS2	1		B	-	+
11-7994466-T-G	EIF3F	1	PS3		+	-
1-1806509-T-C	GNB1	1	PS3	P	+	+
1-1806513-C-A	GNB1	1		P	-	+
1-181651440-G-A	CACNA1E	1		P	-	+
1-181715374-G-C	CACNA1E	1		B	-	+
1-181718098-G-A	CACNA1E	1		B	-	+
1-181720261-A-C	CACNA1E	1		P	-	+
1-181724489-C-A	CACNA1E	1		P	-	+
1-181724499-G-A	CACNA1E	1	PS3	P	-	+
1-181733553-C-T	CACNA1E	1		B	-	+
1-1817848-T-C	GNB1	1		B	-	+
1-181793756-G-T	CACNA1E	1		B	-	+
11-822572-G-C	PNPLA2	1		P	-	-
11-823586-C-G	PNPLA2	1		B	-	+
1-183563305-A-C	NCF2	1		P	-	+
1-183567223-G-A	NCF2	1		B	-	+
11-85631730-C-T	TMEM126B	1		B	-	+
11-85636171-G-T	TMEM126B	1	PS3	P	+	+
11-86250329-A-C	EED	1		B	-	+
11-86257543-A-G	EED	1		P	-	+
11-86951282-C-G	FZD4	1		P	-	+
11-86951351-C-T	FZD4	1		B	-	+
11-86952145-C-T	FZD4	1	PS3	P	+	+
11-86952254-G-A	FZD4	1		B	-	+
11-86952415-A-T	FZD4	1		P	-	+
11-86954989-G-A	FZD4	1		B	-	+
11-88294041-T-C	CTSC	1		B	-	+
11-88294383-G-A	CTSC	1		P	-	+
11-88296207-C-G	CTSC	1		P	-	+
11-88309239-T-C	CTSC	1		B	-	+
11-88312415-A-G	CTSC	1		B	-	+
11-88335052-A-C	CTSC	1	PS3	P	+	+
11-89178183-G-A	TYR	1	PS3		+	-
11-89178243-G-T	TYR	1	PS3		+	-
11-89178608-G-A	TYR	1	PS3		+	-
11-89178668-C-T	TYR	1	PS3		+	-
11-89191205-G-T	TYR	1	PS3		+	-
11-89227897-A-T	TYR	1	PS3		+	-
11-89227904-C-A	TYR	1	PS3		+	-
11-89227932-C-A	TYR	1	PS3		+	-
11-89227933-G-A	TYR	1	PS3		+	-
11-89284805-C-T	TYR	1	PS3		+	-
11-89284843-G-A	TYR	1	PS3		+	-
11-89284853-G-A	TYR	1	PS3		+	-
1-19230854-C-T	EMC1	1		B	-	+
1-19238850-C-G	EMC1	1		B	-	+
1-19243991-G-A	EMC1	1	PS3	P	+	+
1-19251508-A-C	EMC1	1		P	-	+
11-93784720-G-C	MED17	1		B	-	+
11-93796509-T-C	MED17	1		P	-	+
11-94447222-T-C	MRE11	1		B	-	+
11-94476318-C-G	MRE11	1		P	-	-
1-196673076-C-T	CFH	1		P	-	+
1-196673103-G-A	CFH	1		B	-	+
1-196743490-T-C	CFH	1		B	-	+
1-196743494-T-C	CFH	1		B	-	+
1-196743496-G-C	CFH	1		B	-	+
1-196745862-A-G	CFH	1		P	-	+
1-196747189-C-T	CFH	1	PS3	P	+	+
1-196747207-T-C	CFH	1		P	-	-
1-197328935-G-T	CRB1	1		P	-	+
1-197347357-C-T	CRB1	1		B	-	+
1-197356917-T-G	CRB1	1		B	-	+
1-197421017-G-C	CRB1	1		B	-	+
1-197421176-T-C	CRB1	1		P	-	+
1-197421518-G-T	CRB1	1		P	-	+
1-197427559-C-A	CRB1	1		P	-	+
1-197427631-G-A	CRB1	1		B	-	+
1-197427880-T-C	CRB1	1		P	-	+
1-197427888-G-A	CRB1	1		B	-	+
1-197434840-G-A	CRB1	1		B	-	+
1-197434877-A-T	CRB1	1		P	-	+
1-197435404-T-A	CRB1	1		P	-	-
1-197442279-G-A	CRB1	1		B	-	-
1-200649118-T-C	DDX59	1		B	-	+
1-200650639-A-C	DDX59	1		P	-	+
1-201039883-C-T	CACNA1S	1		B	-	+
1-201047168-G-A	CACNA1S	1		B	-	-
1-201053259-C-T	CACNA1S	1		B	-	+
1-201053539-G-C	CACNA1S	1		P	-	+
1-201060816-G-T	CACNA1S	1		P	-	+
1-201066284-C-G	CACNA1S	1		P	-	+
1-201069482-A-G	CACNA1S	1		B	-	+
1-201072758-G-A	CACNA1S	1		P	-	+
1-201077915-C-T	CACNA1S	1	PS3	P	+	+
1-201077916-G-A	CACNA1S	1		P	-	+
1-201083182-A-T	CACNA1S	1		B	-	+
1-201092068-T-C	CACNA1S	1		B	-	-
1-201359627-T-C	TNNT2	1	PS3		+	-
7-155811974-T-C	SHH	0.0455957	Proxy Benign		-	-
1-201363330-G-A	TNNT2	1		P	-	+
1-201363349-G-A	TNNT2	1	PS3		+	-
1-201364336-G-A	TNNT2	1	PS3		+	-
1-201364366-G-A	TNNT2	1	PS3		+	-
1-201364369-G-A	TNNT2	1	PS3		+	-
1-201365244-A-T	TNNT2	1	PS3		-	-
1-201365291-C-A	TNNT2	1	PS3		+	-
1-201365291-C-T	TNNT2	1	PS3		+	-
1-201365297-C-T	TNNT2	1	PS3		+	-
1-201365298-G-A	TNNT2	1	PS3		+	-
1-201365303-A-T	TNNT2	1	PS3		+	-
1-201365638-A-T	TNNT2	1	PS3		+	-
1-2028236-C-T	GABRD	1		P	-	+
1-2028260-G-A	GABRD	1		B	-	+
1-204166236-A-G	REN	1		P	-	+
1-204166272-G-C	REN	1		B	-	+
1-20637956-G-C	PINK1	1	PS3	P	+	+
1-20644651-C-T	PINK1	1		P	-	+
1-20645618-G-A	PINK1	1		B	-	+
1-20645640-T-C	PINK1	1	PS3	P	-	-
1-20649169-G-A	PINK1	1		B	-	+
1-20650507-A-C	PINK1	1		B	-	+
1-209617514-G-A	LAMB3	1		B	-	-
1-209618025-C-G	LAMB3	1		B	-	+
1-209629806-A-G	LAMB3	1		P	-	+
1-209630681-A-T	LAMB3	1		P	-	-
1-209788614-C-T	IRF6	1	PS3	P	+	+
[truncated: 26,342 more rows]

## Sheet: Supplementary Table 2
#Supplementary Table 2. Training features of the FuncVEP and ClinVEP models.
Name	Category	Type	Source	Used by CTI	Used by CTE	Used by SP
PrimateAI_score	Population-Tuned	Variant Effect Predictor	https://www.dbnsfp.org/	-	-	-
PAI3D_score	Population-Tuned	Variant Effect Predictor	https://primateai3d.basespace.illumina.com/download	-	-	-
SIFT_score	Population-Free	Variant Effect Predictor	https://www.dbnsfp.org/	+	+	-
Polyphen2_HDIV_score	Clinical-Trained Single Predictor	Variant Effect Predictor	https://www.dbnsfp.org/	+	-	-
Polyphen2_HVAR_score	Clinical-Trained Single Predictor	Variant Effect Predictor	https://www.dbnsfp.org/	+	-	-
MutationTaster_score	Clinical-Trained Meta Predictor	Variant Effect Predictor	https://www.dbnsfp.org/	-	-	-
MutationAssessor_score	Population-Free	Variant Effect Predictor	https://www.dbnsfp.org/	+	+	-
PROVEAN_score	Population-Free	Variant Effect Predictor	https://www.dbnsfp.org/	+	+	-
VEST4_score	Clinical-Trained Single Predictor	Variant Effect Predictor	https://www.dbnsfp.org/	+	-	-
MetaSVM_score	Clinical-Trained Meta Predictor	Variant Effect Predictor	https://www.dbnsfp.org/	+	-	-
MetaLR_score	Clinical-Trained Meta Predictor	Variant Effect Predictor	https://www.dbnsfp.org/	+	-	-
MetaRNN_score	Clinical-Trained Meta Predictor	Variant Effect Predictor	https://www.dbnsfp.org/	+	-	-
M_CAP_score	Clinical-Trained Meta Predictor	Variant Effect Predictor	https://www.dbnsfp.org/	+	-	-
REVEL_score	Clinical-Trained Meta Predictor	Variant Effect Predictor	https://www.dbnsfp.org/	+	-	-
MutPred_score	Clinical-Trained Single Predictor	Variant Effect Predictor	https://www.dbnsfp.org/	+	-	-
MVP_score	Clinical-Trained Meta Predictor	Variant Effect Predictor	https://www.dbnsfp.org/	-	-	-
gMVP_score	Clinical-Trained Meta Predictor	Variant Effect Predictor	https://www.dbnsfp.org/	-	-	-
MPC_score	Clinical-Trained Meta Predictor	Variant Effect Predictor	https://www.dbnsfp.org/	+	-	-
DEOGEN2_score	Clinical-Trained Meta Predictor	Variant Effect Predictor	https://www.dbnsfp.org/	+	-	-
BayesDel_addAF_score	Clinical-Trained Meta Predictor	Variant Effect Predictor	https://www.dbnsfp.org/	-	-	-
BayesDel_noAF_score	Clinical-Trained Meta Predictor	Variant Effect Predictor	https://www.dbnsfp.org/	-	-	-
ClinPred_score	Clinical-Trained Meta Predictor	Variant Effect Predictor	https://www.dbnsfp.org/	+	-	-
LIST_S2_score	Population-Tuned	Variant Effect Predictor	https://www.dbnsfp.org/	+	+	-
VARITY_R_score	Clinical-Trained Meta Predictor	Variant Effect Predictor	https://www.dbnsfp.org/	+	-	-
VARITY_ER_score	Clinical-Trained Meta Predictor	Variant Effect Predictor	https://www.dbnsfp.org/	+	-	-
VARITY_R_LOO_score	Clinical-Trained Meta Predictor	Variant Effect Predictor	https://www.dbnsfp.org/	+	-	-
VARITY_ER_LOO_score	Clinical-Trained Meta Predictor	Variant Effect Predictor	https://www.dbnsfp.org/	+	-	-
ESM1b_score	Population-Free	Variant Effect Predictor	https://www.dbnsfp.org/	+	+	-
AlphaMissense_score	Population-Tuned	Variant Effect Predictor	https://www.dbnsfp.org/	+	+	-
PHACTboost_score	Clinical-Trained Meta Predictor	Variant Effect Predictor	https://www.dbnsfp.org/	-	-	-
MutFormer_score	Clinical-Trained Meta Predictor	Variant Effect Predictor	https://www.dbnsfp.org/	+	-	-
MutScore_score	Clinical-Trained Meta Predictor	Variant Effect Predictor	https://www.dbnsfp.org/	+	-	-
CADD_raw	Clinical-Trained Meta Predictor	Variant Effect Predictor	https://www.dbnsfp.org/	+	-	-
DANN_score	Clinical-Trained Meta Predictor	Variant Effect Predictor	https://www.dbnsfp.org/	-	-	-
fathmm_XF_coding_score	Clinical-Trained Meta Predictor	Variant Effect Predictor	https://www.dbnsfp.org/	+	-	-
Eigen_raw_coding	Clinical-Trained Meta Predictor	Variant Effect Predictor	https://www.dbnsfp.org/	-	-	-
Eigen_phred_coding	Clinical-Trained Meta Predictor	Variant Effect Predictor	https://www.dbnsfp.org/	-	-	-
Eigen_PC_raw_coding	Clinical-Trained Meta Predictor	Variant Effect Predictor	https://www.dbnsfp.org/	-	-	-
Eigen_PC_phred_coding	Clinical-Trained Meta Predictor	Variant Effect Predictor	https://www.dbnsfp.org/	-	-	-
GERP___NR	Conservation Score-Based	Conservation Score-Based	https://www.dbnsfp.org/	+	+	+
GERP___RS	Conservation Score-Based	Conservation Score-Based	https://www.dbnsfp.org/	+	+	+
GERP_91_mammals	Conservation Score-Based	Conservation Score-Based	https://www.dbnsfp.org/	+	+	+
phyloP100way_vertebrate	Conservation Score-Based	Conservation Score-Based	https://www.dbnsfp.org/	+	+	+
phyloP470way_mammalian	Conservation Score-Based	Conservation Score-Based	https://www.dbnsfp.org/	+	+	+
phyloP17way_primate	Conservation Score-Based	Conservation Score-Based	https://www.dbnsfp.org/	+	+	+
phastCons100way_vertebrate	Conservation Score-Based	Conservation Score-Based	https://www.dbnsfp.org/	+	+	+
phastCons470way_mammalian	Conservation Score-Based	Conservation Score-Based	https://www.dbnsfp.org/	+	+	+
phastCons17way_primate	Conservation Score-Based	Conservation Score-Based	https://www.dbnsfp.org/	+	+	+
bStatistic	Conservation Score-Based	Conservation Score-Based	https://www.dbnsfp.org/	+	+	+
Kidera_f1	Amino Acid Conversion Matrix	Mutation-Level	https://doi.org/10.1007/BF01025492	+	+	+
Kidera_f2	Amino Acid Conversion Matrix	Mutation-Level	https://doi.org/10.1007/BF01025492	+	+	+
Kidera_f3	Amino Acid Conversion Matrix	Mutation-Level	https://doi.org/10.1007/BF01025492	+	+	+
Kidera_f4	Amino Acid Conversion Matrix	Mutation-Level	https://doi.org/10.1007/BF01025492	+	+	+
Kidera_f5	Amino Acid Conversion Matrix	Mutation-Level	https://doi.org/10.1007/BF01025492	+	+	+
Kidera_f6	Amino Acid Conversion Matrix	Mutation-Level	https://doi.org/10.1007/BF01025492	+	+	+
Kidera_f7	Amino Acid Conversion Matrix	Mutation-Level	https://doi.org/10.1007/BF01025492	+	+	+
Kidera_f8	Amino Acid Conversion Matrix	Mutation-Level	https://doi.org/10.1007/BF01025492	+	+	+
Kidera_f9	Amino Acid Conversion Matrix	Mutation-Level	https://doi.org/10.1007/BF01025492	+	+	+
Kidera_f10	Amino Acid Conversion Matrix	Mutation-Level	https://doi.org/10.1007/BF01025492	+	+	+
Atchley_f1	Amino Acid Conversion Matrix	Mutation-Level	https://doi.org/10.1073/pnas.0408677102	+	+	+
Atchley_f2	Amino Acid Conversion Matrix	Mutation-Level	https://doi.org/10.1073/pnas.0408677102	+	+	+
Atchley_f3	Amino Acid Conversion Matrix	Mutation-Level	https://doi.org/10.1073/pnas.0408677102	+	+	+
Atchley_f4	Amino Acid Conversion Matrix	Mutation-Level	https://doi.org/10.1073/pnas.0408677102	+	+	+
Atchley_f5	Amino Acid Conversion Matrix	Mutation-Level	https://doi.org/10.1073/pnas.0408677102	+	+	+
Grantham	Amino Acid Conversion Matrix	Mutation-Level	https://doi.org/10.1126/science.185.4154.862	+	+	+
BLOSUM80	Conservation Score-Based	Conservation Score-Based	https://doi.org/10.1073/pnas.89.22.10915	+	+	+
BLOSUM62	Conservation Score-Based	Conservation Score-Based	https://doi.org/10.1073/pnas.89.22.10915	+	+	+
BLOSUM70	Conservation Score-Based	Conservation Score-Based	https://doi.org/10.1073/pnas.89.22.10915	+	+	+
VTML	Amino Acid Conversion Matrix	Mutation-Level	https://doi.org/10.1093/oxfordjournals.molbev.a003985	+	+	+
PFASUM60	Amino Acid Conversion Matrix	Mutation-Level	https://doi.org/10.1186/s12859-017-1703-z	+	+	+
MIQS	Amino Acid Conversion Matrix	Mutation-Level	https://doi.org/10.1093/bioinformatics/btt694	+	+	+
OddsRat	Amino Acid Conversion Matrix	Mutation-Level	This study	+	+	+
MTR	Constraint Score-Based	Residue-Level	https://doi.org/10.6084/m9.figshare.24587328	+	+	+
a3d_score	Structural	Residue-Level	https://biocomp.chem.uw.edu.pl/A3D2/hproteome	+	+	+
alphafold_score	Structural	Residue-Level	https://biocomp.chem.uw.edu.pl/A3D2/hproteome	+	+	+
AlphScore	Population-Tuned	Variant Effect Predictor	https://zenodo.org/records/6288139	+	+	-
glm_AlphCadd	Clinical-Trained Meta Predictor	Variant Effect Predictor	https://zenodo.org/records/6288139	+	-	-
glm_AlphRevel	Clinical-Trained Meta Predictor	Variant Effect Predictor	https://zenodo.org/records/6288139	+	-	-
glm_RevelCadd	Clinical-Trained Meta Predictor	Variant Effect Predictor	https://zenodo.org/records/6288139	+	-	-
glm_AlphRevelCadd	Clinical-Trained Meta Predictor	Variant Effect Predictor	https://zenodo.org/records/6288139	+	-	-
glm_AlphDeogen	Clinical-Trained Meta Predictor	Variant Effect Predictor	https://zenodo.org/records/6288139	+	-	-
glm_CaddDeogen	Clinical-Trained Meta Predictor	Variant Effect Predictor	https://zenodo.org/records/6288139	+	-	-
glm_DeogenRevel	Clinical-Trained Meta Predictor	Variant Effect Predictor	https://zenodo.org/records/6288139	+	-	-
glm_AlphDeogenRevel	Clinical-Trained Meta Predictor	Variant Effect Predictor	https://zenodo.org/records/6288139	+	-	-
glm_AlphCaddDeogen	Clinical-Trained Meta Predictor	Variant Effect Predictor	https://zenodo.org/records/6288139	+	-	-
glm_CaddDeogenRevel	Clinical-Trained Meta Predictor	Variant Effect Predictor	https://zenodo.org/records/6288139	+	-	-
PHACT	Population-Free	Variant Effect Predictor	https://zenodo.org/records/11281312	+	+	-
LoGoFunc_neutral	Clinical-Trained Meta Predictor	Variant Effect Predictor	https://zenodo.org/records/10126185	-	-	-
LoGoFunc_GOF	Clinical-Trained Meta Predictor	Variant Effect Predictor	https://zenodo.org/records/10126185	-	-	-
LoGoFunc_LOF	Clinical-Trained Meta Predictor	Variant Effect Predictor	https://zenodo.org/records/10126185	-	-	-
gpnmsa_score	Population-Free	Variant Effect Predictor	https://huggingface.co/collections/songlab/gpn-msa-65319280c93c85e11c803887	+	+	-
jarvis	Constraint Score-Based	Residue-Level	https://genome.ucsc.edu/	+	+	+
mtr3daf2_5a	Constraint Score-Based	Residue-Level	https://biosig.lab.uq.edu.au/mtr3daf2/datasets	+	+	+
mtr3daf2_8a	Constraint Score-Based	Residue-Level	https://biosig.lab.uq.edu.au/mtr3daf2/datasets	+	+	+
mtr3daf2_11a	Constraint Score-Based	Residue-Level	https://biosig.lab.uq.edu.au/mtr3daf2/datasets	+	+	+
mtr3daf2_14a	Constraint Score-Based	Residue-Level	https://biosig.lab.uq.edu.au/mtr3daf2/datasets	+	+	+
popEVE	Population-Tuned	Variant Effect Predictor	https://pop.evemodel.org/documentation	+	+	-
ESM1v	Population-Free	Variant Effect Predictor	https://pop.evemodel.org/documentation	+	+	-
EVH_epistatic	Population-Tuned	Variant Effect Predictor	https://pop.evemodel.org/documentation	+	+	-
EVH_independent	Population-Tuned	Variant Effect Predictor	https://pop.evemodel.org/documentation	+	+	-
EWSIM	Population-Tuned	Variant Effect Predictor	https://pop.evemodel.org/documentation	+	+	-
UKBdepletion_score	Constraint Score-Based	Residue-Level	https://genome.ucsc.edu/	+	+	+
sigma_score	Clinical-Trained Single Predictor	Variant Effect Predictor	https://sigma-pred.org/	+	-	-
lof.pLI	Gene constraint score-based	Gene-Level	https://gnomad.broadinstitute.org/data	+	+	+
lof.z_score	Gene constraint score-based	Gene-Level	https://gnomad.broadinstitute.org/data	+	+	+
mis.z_score	Gene constraint score-based	Gene-Level	https://gnomad.broadinstitute.org/data	+	+	+
syn.z_score	Gene constraint score-based	Gene-Level	https://gnomad.broadinstitute.org/data	+	+	+
phi	Gene constraint score-based	Gene-Level	https://doi.org/10.1371/journal.pcbi.1004647	+	+	+
Residual_Variation_Intolerance_Score	Gene constraint score-based	Gene-Level	https://doi.org/10.1371/journal.pgen.1003709	+	+	+
s_het	Gene constraint score-based	Gene-Level	https://doi.org/10.1038/ng.3831	+	+	+
A375_SKIN	Gene Knock-Out Studies	Gene-Level	https://doi.org/10.1038/ng.3984	+	+	+
A673_BONE	Gene Knock-Out Studies	Gene-Level	https://doi.org/10.1038/ng.3984	+	+	+
BXPC3_PANCREAS	Gene Knock-Out Studies	Gene-Level	https://doi.org/10.1038/ng.3984	+	+	+
CADOES1_BONE	Gene Knock-Out Studies	Gene-Level	https://doi.org/10.1038/ng.3984	+	+	+
CAL120_BREAST	Gene Knock-Out Studies	Gene-Level	https://doi.org/10.1038/ng.3984	+	+	+
COLO741_SKIN	Gene Knock-Out Studies	Gene-Level	https://doi.org/10.1038/ng.3984	+	+	+
CORL105_LUNG	Gene Knock-Out Studies	Gene-Level	https://doi.org/10.1038/ng.3984	+	+	+
EW8_BONE	Gene Knock-Out Studies	Gene-Level	https://doi.org/10.1038/ng.3984	+	+	+
EWS502_BONE	Gene Knock-Out Studies	Gene-Level	https://doi.org/10.1038/ng.3984	+	+	+
G402_SOFT_TISSUE	Gene Knock-Out Studies	Gene-Level	https://doi.org/10.1038/ng.3984	+	+	+
HCC44_LUNG	Gene Knock-Out Studies	Gene-Level	https://doi.org/10.1038/ng.3984	+	+	+
HS294T_SKIN	Gene Knock-Out Studies	Gene-Level	https://doi.org/10.1038/ng.3984	+	+	+
HT29_LARGE_INTESTINE	Gene Knock-Out Studies	Gene-Level	https://doi.org/10.1038/ng.3984	+	+	+
K562_HAEMATOPOIETIC_AND_LYMPHOID_TISSUE	Gene Knock-Out Studies	Gene-Level	https://doi.org/10.1038/ng.3984	+	+	+
L33_PANCREAS	Gene Knock-Out Studies	Gene-Level	https://doi.org/10.1038/ng.3984	+	+	+
LNCAPCLONEFGC_PROSTATE	Gene Knock-Out Studies	Gene-Level	https://doi.org/10.1038/ng.3984	+	+	+
MEWO_SKIN	Gene Knock-Out Studies	Gene-Level	https://doi.org/10.1038/ng.3984	+	+	+
MHHES1_BONE	Gene Knock-Out Studies	Gene-Level	https://doi.org/10.1038/ng.3984	+	+	+
NCIH1373_LUNG	Gene Knock-Out Studies	Gene-Level	https://doi.org/10.1038/ng.3984	+	+	+
NCIH2009_LUNG	Gene Knock-Out Studies	Gene-Level	https://doi.org/10.1038/ng.3984	+	+	+
PANC0327_PANCREAS	Gene Knock-Out Studies	Gene-Level	https://doi.org/10.1038/ng.3984	+	+	+
PANC0813_PANCREAS	Gene Knock-Out Studies	Gene-Level	https://doi.org/10.1038/ng.3984	+	+	+
PANC1_PANCREAS	Gene Knock-Out Studies	Gene-Level	https://doi.org/10.1038/ng.3984	+	+	+
PATU8902_PANCREAS	Gene Knock-Out Studies	Gene-Level	https://doi.org/10.1038/ng.3984	+	+	+
PATU8988T_PANCREAS	Gene Knock-Out Studies	Gene-Level	https://doi.org/10.1038/ng.3984	+	+	+
PC3_PROSTATE	Gene Knock-Out Studies	Gene-Level	https://doi.org/10.1038/ng.3984	+	+	+
RDES_BONE	Gene Knock-Out Studies	Gene-Level	https://doi.org/10.1038/ng.3984	+	+	+
SKES1_BONE	Gene Knock-Out Studies	Gene-Level	https://doi.org/10.1038/ng.3984	+	+	+
SU8686_PANCREAS	Gene Knock-Out Studies	Gene-Level	https://doi.org/10.1038/ng.3984	+	+	+
T47D_BREAST	Gene Knock-Out Studies	Gene-Level	https://doi.org/10.1038/ng.3984	+	+	+
TC32_BONE	Gene Knock-Out Studies	Gene-Level	https://doi.org/10.1038/ng.3984	+	+	+
TC71_BONE	Gene Knock-Out Studies	Gene-Level	https://doi.org/10.1038/ng.3984	+	+	+
TOV112D_OVARY	Gene Knock-Out Studies	Gene-Level	https://doi.org/10.1038/ng.3984	+	+	+
EOL1_HAEMATOPOIETIC_AND_LYMPHOID_TISSUE	Gene Knock-Out Studies	Gene-Level	https://doi.org/10.1038/ng.3984	+	+	+
HEL_HAEMATOPOIETIC_AND_LYMPHOID_TISSUE	Gene Knock-Out Studies	Gene-Level	https://doi.org/10.1038/ng.3984	+	+	+
MOLM13_HAEMATOPOIETIC_AND_LYMPHOID_TISSUE	Gene Knock-Out Studies	Gene-Level	https://doi.org/10.1038/ng.3984	+	+	+
MONOMAC1_HAEMATOPOIETIC_AND_LYMPHOID_TISSUE	Gene Knock-Out Studies	Gene-Level	https://doi.org/10.1038/ng.3984	+	+	+
MV411_HAEMATOPOIETIC_AND_LYMPHOID_TISSUE	Gene Knock-Out Studies	Gene-Level	https://doi.org/10.1038/ng.3984	+	+	+
NB4_HAEMATOPOIETIC_AND_LYMPHOID_TISSUE	Gene Knock-Out Studies	Gene-Level	https://doi.org/10.1038/ng.3984	+	+	+
OCIAML2_HAEMATOPOIETIC_AND_LYMPHOID_TISSUE	Gene Knock-Out Studies	Gene-Level	https://doi.org/10.1038/ng.3984	+	+	+
OCIAML3_HAEMATOPOIETIC_AND_LYMPHOID_TISSUE	Gene Knock-Out Studies	Gene-Level	https://doi.org/10.1038/ng.3984	+	+	+
OCIAML5_HAEMATOPOIETIC_AND_LYMPHOID_TISSUE	Gene Knock-Out Studies	Gene-Level	https://doi.org/10.1038/ng.3984	+	+	+
P31FUJ_HAEMATOPOIETIC_AND_LYMPHOID_TISSUE	Gene Knock-Out Studies	Gene-Level	https://doi.org/10.1038/ng.3984	+	+	+
PL21_HAEMATOPOIETIC_AND_LYMPHOID_TISSUE	Gene Knock-Out Studies	Gene-Level	https://doi.org/10.1038/ng.3984	+	+	+
SKM1_HAEMATOPOIETIC_AND_LYMPHOID_TISSUE	Gene Knock-Out Studies	Gene-Level	https://doi.org/10.1038/ng.3984	+	+	+
TF1_HAEMATOPOIETIC_AND_LYMPHOID_TISSUE	Gene Knock-Out Studies	Gene-Level	https://doi.org/10.1038/ng.3984	+	+	+
THP1_HAEMATOPOIETIC_AND_LYMPHOID_TISSUE	Gene Knock-Out Studies	Gene-Level	https://doi.org/10.1038/ng.3984	+	+	+
143B_BONE	Gene Knock-Out Studies	Gene-Level	https://doi.org/10.1038/ng.3984	+	+	+
42MGBA_CENTRAL_NERVOUS_SYSTEM	Gene Knock-Out Studies	Gene-Level	https://doi.org/10.1038/ng.3984	+	+	+
5637_URINARY_TRACT	Gene Knock-Out Studies	Gene-Level	https://doi.org/10.1038/ng.3984	+	+	+
59M_OVARY	Gene Knock-Out Studies	Gene-Level	https://doi.org/10.1038/ng.3984	+	+	+
639V_URINARY_TRACT	Gene Knock-Out Studies	Gene-Level	https://doi.org/10.1038/ng.3984	+	+	+
647V_URINARY_TRACT	Gene Knock-Out Studies	Gene-Level	https://doi.org/10.1038/ng.3984	+	+	+
769P_KIDNEY	Gene Knock-Out Studies	Gene-Level	https://doi.org/10.1038/ng.3984	+	+	+
786O_KIDNEY	Gene Knock-Out Studies	Gene-Level	https://doi.org/10.1038/ng.3984	+	+	+
8305C_THYROID	Gene Knock-Out Studies	Gene-Level	https://doi.org/10.1038/ng.3984	+	+	+
8MGBA_CENTRAL_NERVOUS_SYSTEM	Gene Knock-Out Studies	Gene-Level	https://doi.org/10.1038/ng.3984	+	+	+
A2058_SKIN	Gene Knock-Out Studies	Gene-Level	https://doi.org/10.1038/ng.3984	+	+	+
A2780_OVARY	Gene Knock-Out Studies	Gene-Level	https://doi.org/10.1038/ng.3984	+	+	+
A549_LUNG	Gene Knock-Out Studies	Gene-Level	https://doi.org/10.1038/ng.3984	+	+	+
ABC1_LUNG	Gene Knock-Out Studies	Gene-Level	https://doi.org/10.1038/ng.3984	+	+	+
AGS_STOMACH	Gene Knock-Out Studies	Gene-Level	https://doi.org/10.1038/ng.3984	+	+	+
ASPC1_PANCREAS	Gene Knock-Out Studies	Gene-Level	https://doi.org/10.1038/ng.3984	+	+	+
AU565_BREAST	Gene Knock-Out Studies	Gene-Level	https://doi.org/10.1038/ng.3984	+	+	+
BC3C_URINARY_TRACT	Gene Knock-Out Studies	Gene-Level	https://doi.org/10.1038/ng.3984	+	+	+
BFTC905_URINARY_TRACT	Gene Knock-Out Studies	Gene-Level	https://doi.org/10.1038/ng.3984	+	+	+
BFTC909_KIDNEY	Gene Knock-Out Studies	Gene-Level	https://doi.org/10.1038/ng.3984	+	+	+
BHY_UPPER_AERODIGESTIVE_TRACT	Gene Knock-Out Studies	Gene-Level	https://doi.org/10.1038/ng.3984	+	+	+
BICR22_UPPER_AERODIGESTIVE_TRACT	Gene Knock-Out Studies	Gene-Level	https://doi.org/10.1038/ng.3984	+	+	+
BICR6_UPPER_AERODIGESTIVE_TRACT	Gene Knock-Out Studies	Gene-Level	https://doi.org/10.1038/ng.3984	+	+	+
BT549_BREAST	Gene Knock-Out Studies	Gene-Level	https://doi.org/10.1038/ng.3984	+	+	+
C2BBE1_LARGE_INTESTINE	Gene Knock-Out Studies	Gene-Level	https://doi.org/10.1038/ng.3984	+	+	+
C32_SKIN	Gene Knock-Out Studies	Gene-Level	https://doi.org/10.1038/ng.3984	+	+	+
CAKI1_KIDNEY	Gene Knock-Out Studies	Gene-Level	https://doi.org/10.1038/ng.3984	+	+	+
CAKI2_KIDNEY	Gene Knock-Out Studies	Gene-Level	https://doi.org/10.1038/ng.3984	+	+	+
CAL27_UPPER_AERODIGESTIVE_TRACT	Gene Knock-Out Studies	Gene-Level	https://doi.org/10.1038/ng.3984	+	+	+
CAL29_URINARY_TRACT	Gene Knock-Out Studies	Gene-Level	https://doi.org/10.1038/ng.3984	+	+	+
CAL51_BREAST	Gene Knock-Out Studies	Gene-Level	https://doi.org/10.1038/ng.3984	+	+	+
CAL78_BONE	Gene Knock-Out Studies	Gene-Level	https://doi.org/10.1038/ng.3984	+	+	+
CALU6_LUNG	Gene Knock-Out Studies	Gene-Level	https://doi.org/10.1038/ng.3984	+	+	+
CAMA1_BREAST	Gene Knock-Out Studies	Gene-Level	https://doi.org/10.1038/ng.3984	+	+	+
CAOV3_OVARY	Gene Knock-Out Studies	Gene-Level	https://doi.org/10.1038/ng.3984	+	+	+
CAS1_CENTRAL_NERVOUS_SYSTEM	Gene Knock-Out Studies	Gene-Level	https://doi.org/10.1038/ng.3984	+	+	+
CCFSTTG1_CENTRAL_NERVOUS_SYSTEM	Gene Knock-Out Studies	Gene-Level	https://doi.org/10.1038/ng.3984	+	+	+
CCK81_LARGE_INTESTINE	Gene Knock-Out Studies	Gene-Level	https://doi.org/10.1038/ng.3984	+	+	+
CFPAC1_PANCREAS	Gene Knock-Out Studies	Gene-Level	https://doi.org/10.1038/ng.3984	+	+	+
CHAGOK1_LUNG	Gene Knock-Out Studies	Gene-Level	https://doi.org/10.1038/ng.3984	+	+	+
CHP212_AUTONOMIC_GANGLIA	Gene Knock-Out Studies	Gene-Level	https://doi.org/10.1038/ng.3984	+	+	+
CJM_SKIN	Gene Knock-Out Studies	Gene-Level	https://doi.org/10.1038/ng.3984	+	+	+
CL40_LARGE_INTESTINE	Gene Knock-Out Studies	Gene-Level	https://doi.org/10.1038/ng.3984	+	+	+
COLO678_LARGE_INTESTINE	Gene Knock-Out Studies	Gene-Level	https://doi.org/10.1038/ng.3984	+	+	+
COLO679_SKIN	Gene Knock-Out Studies	Gene-Level	https://doi.org/10.1038/ng.3984	+	+	+
COLO792_SKIN	Gene Knock-Out Studies	Gene-Level	https://doi.org/10.1038/ng.3984	+	+	+
COLO800_SKIN	Gene Knock-Out Studies	Gene-Level	https://doi.org/10.1038/ng.3984	+	+	+
CORL279_LUNG	Gene Knock-Out Studies	Gene-Level	https://doi.org/10.1038/ng.3984	+	+	+
CORL47_LUNG	Gene Knock-Out Studies	Gene-Level	https://doi.org/10.1038/ng.3984	+	+	+
COV318_OVARY	Gene Knock-Out Studies	Gene-Level	https://doi.org/10.1038/ng.3984	+	+	+
COV362_OVARY	Gene Knock-Out Studies	Gene-Level	https://doi.org/10.1038/ng.3984	+	+	+
COV434_OVARY	Gene Knock-Out Studies	Gene-Level	https://doi.org/10.1038/ng.3984	+	+	+
COV504_OVARY	Gene Knock-Out Studies	Gene-Level	https://doi.org/10.1038/ng.3984	+	+	+
COV644_OVARY	Gene Knock-Out Studies	Gene-Level	https://doi.org/10.1038/ng.3984	+	+	+
D283MED_CENTRAL_NERVOUS_SYSTEM	Gene Knock-Out Studies	Gene-Level	https://doi.org/10.1038/ng.3984	+	+	+
D341MED_CENTRAL_NERVOUS_SYSTEM	Gene Knock-Out Studies	Gene-Level	https://doi.org/10.1038/ng.3984	+	+	+
DANG_PANCREAS	Gene Knock-Out Studies	Gene-Level	https://doi.org/10.1038/ng.3984	+	+	+
DAOY_CENTRAL_NERVOUS_SYSTEM	Gene Knock-Out Studies	Gene-Level	https://doi.org/10.1038/ng.3984	+	+	+
DETROIT562_UPPER_AERODIGESTIVE_TRACT	Gene Knock-Out Studies	Gene-Level	https://doi.org/10.1038/ng.3984	+	+	+
DKMG_CENTRAL_NERVOUS_SYSTEM	Gene Knock-Out Studies	Gene-Level	https://doi.org/10.1038/ng.3984	+	+	+
DLD1_LARGE_INTESTINE	Gene Knock-Out Studies	Gene-Level	https://doi.org/10.1038/ng.3984	+	+	+
DU4475_BREAST	Gene Knock-Out Studies	Gene-Level	https://doi.org/10.1038/ng.3984	+	+	+
EFM19_BREAST	Gene Knock-Out Studies	Gene-Level	https://doi.org/10.1038/ng.3984	+	+	+
EFO21_OVARY	Gene Knock-Out Studies	Gene-Level	https://doi.org/10.1038/ng.3984	+	+	+
EFO27_OVARY	Gene Knock-Out Studies	Gene-Level	https://doi.org/10.1038/ng.3984	+	+	+
EKVX_LUNG	Gene Knock-Out Studies	Gene-Level	https://doi.org/10.1038/ng.3984	+	+	+
EPLC272H_LUNG	Gene Knock-Out Studies	Gene-Level	https://doi.org/10.1038/ng.3984	+	+	+
ES2_OVARY	Gene Knock-Out Studies	Gene-Level	https://doi.org/10.1038/ng.3984	+	+	+
ESS1_ENDOMETRIUM	Gene Knock-Out Studies	Gene-Level	https://doi.org/10.1038/ng.3984	+	+	+
F5_CENTRAL_NERVOUS_SYSTEM	Gene Knock-Out Studies	Gene-Level	https://doi.org/10.1038/ng.3984	+	+	+
FADU_UPPER_AERODIGESTIVE_TRACT	Gene Knock-Out Studies	Gene-Level	https://doi.org/10.1038/ng.3984	+	+	+
FU97_STOMACH	Gene Knock-Out Studies	Gene-Level	https://doi.org/10.1038/ng.3984	+	+	+
G292CLONEA141B1_BONE	Gene Knock-Out Studies	Gene-Level	https://doi.org/10.1038/ng.3984	+	+	+
G401_SOFT_TISSUE	Gene Knock-Out Studies	Gene-Level	https://doi.org/10.1038/ng.3984	+	+	+
GAMG_CENTRAL_NERVOUS_SYSTEM	Gene Knock-Out Studies	Gene-Level	https://doi.org/10.1038/ng.3984	+	+	+
GB1_CENTRAL_NERVOUS_SYSTEM	Gene Knock-Out Studies	Gene-Level	https://doi.org/10.1038/ng.3984	+	+	+
GCIY_STOMACH	Gene Knock-Out Studies	Gene-Level	https://doi.org/10.1038/ng.3984	+	+	+
GI1_CENTRAL_NERVOUS_SYSTEM	Gene Knock-Out Studies	Gene-Level	https://doi.org/10.1038/ng.3984	+	+	+
GSS_STOMACH	Gene Knock-Out Studies	Gene-Level	https://doi.org/10.1038/ng.3984	+	+	+
H4_CENTRAL_NERVOUS_SYSTEM	Gene Knock-Out Studies	Gene-Level	https://doi.org/10.1038/ng.3984	+	+	+
HARA_LUNG	Gene Knock-Out Studies	Gene-Level	https://doi.org/10.1038/ng.3984	+	+	+
HCC1143_BREAST	Gene Knock-Out Studies	Gene-Level	https://doi.org/10.1038/ng.3984	+	+	+
HCC1359_LUNG	Gene Knock-Out Studies	Gene-Level	https://doi.org/10.1038/ng.3984	+	+	+
HCC1395_BREAST	Gene Knock-Out Studies	Gene-Level	https://doi.org/10.1038/ng.3984	+	+	+
HCC1419_BREAST	Gene Knock-Out Studies	Gene-Level	https://doi.org/10.1038/ng.3984	+	+	+
HCC1428_BREAST	Gene Knock-Out Studies	Gene-Level	https://doi.org/10.1038/ng.3984	+	+	+
HCC15_LUNG	Gene Knock-Out Studies	Gene-Level	https://doi.org/10.1038/ng.3984	+	+	+
HCC1806_BREAST	Gene Knock-Out Studies	Gene-Level	https://doi.org/10.1038/ng.3984	+	+	+
HCC1937_BREAST	Gene Knock-Out Studies	Gene-Level	https://doi.org/10.1038/ng.3984	+	+	+
HCC1954_BREAST	Gene Knock-Out Studies	Gene-Level	https://doi.org/10.1038/ng.3984	+	+	+
HCC202_BREAST	Gene Knock-Out Studies	Gene-Level	https://doi.org/10.1038/ng.3984	+	+	+
HCC56_LARGE_INTESTINE	Gene Knock-Out Studies	Gene-Level	https://doi.org/10.1038/ng.3984	+	+	+
HCC827_LUNG	Gene Knock-Out Studies	Gene-Level	https://doi.org/10.1038/ng.3984	+	+	+
HCC95_LUNG	Gene Knock-Out Studies	Gene-Level	https://doi.org/10.1038/ng.3984	+	+	+
HEC1A_ENDOMETRIUM	Gene Knock-Out Studies	Gene-Level	https://doi.org/10.1038/ng.3984	+	+	+
HEC1B_ENDOMETRIUM	Gene Knock-Out Studies	Gene-Level	https://doi.org/10.1038/ng.3984	+	+	+
HEC251_ENDOMETRIUM	Gene Knock-Out Studies	Gene-Level	https://doi.org/10.1038/ng.3984	+	+	+
HEC50B_ENDOMETRIUM	Gene Knock-Out Studies	Gene-Level	https://doi.org/10.1038/ng.3984	+	+	+
HEC59_ENDOMETRIUM	Gene Knock-Out Studies	Gene-Level	https://doi.org/10.1038/ng.3984	+	+	+
HEC6_ENDOMETRIUM	Gene Knock-Out Studies	Gene-Level	https://doi.org/10.1038/ng.3984	+	+	+
HEYA8_OVARY	Gene Knock-Out Studies	Gene-Level	https://doi.org/10.1038/ng.3984	+	+	+
HGC27_STOMACH	Gene Knock-Out Studies	Gene-Level	https://doi.org/10.1038/ng.3984	+	+	+
HLF_LIVER	Gene Knock-Out Studies	Gene-Level	https://doi.org/10.1038/ng.3984	+	+	+
HMC18_BREAST	Gene Knock-Out Studies	Gene-Level	https://doi.org/10.1038/ng.3984	+	+	+
HOP62_LUNG	Gene Knock-Out Studies	Gene-Level	https://doi.org/10.1038/ng.3984	+	+	+
HS294T_SKIN_2	Gene Knock-Out Studies	Gene-Level	https://doi.org/10.1038/ng.3984	+	+	+
HS578T_BREAST	Gene Knock-Out Studies	Gene-Level	https://doi.org/10.1038/ng.3984	+	+	+
HS683_CENTRAL_NERVOUS_SYSTEM	Gene Knock-Out Studies	Gene-Level	https://doi.org/10.1038/ng.3984	+	+	+
HS695T_SKIN	Gene Knock-Out Studies	Gene-Level	https://doi.org/10.1038/ng.3984	+	+	+
HS729_SOFT_TISSUE	Gene Knock-Out Studies	Gene-Level	https://doi.org/10.1038/ng.3984	+	+	+
HS766T_PANCREAS	Gene Knock-Out Studies	Gene-Level	https://doi.org/10.1038/ng.3984	+	+	+
HS944T_SKIN	Gene Knock-Out Studies	Gene-Level	https://doi.org/10.1038/ng.3984	+	+	+
HSC3_UPPER_AERODIGESTIVE_TRACT	Gene Knock-Out Studies	Gene-Level	https://doi.org/10.1038/ng.3984	+	+	+
HT1080_SOFT_TISSUE	Gene Knock-Out Studies	Gene-Level	https://doi.org/10.1038/ng.3984	+	+	+
HT115_LARGE_INTESTINE	Gene Knock-Out Studies	Gene-Level	https://doi.org/10.1038/ng.3984	+	+	+
HT1197_URINARY_TRACT	Gene Knock-Out Studies	Gene-Level	https://doi.org/10.1038/ng.3984	+	+	+
HT1376_URINARY_TRACT	Gene Knock-Out Studies	Gene-Level	https://doi.org/10.1038/ng.3984	+	+	+
HT144_SKIN	Gene Knock-Out Studies	Gene-Level	https://doi.org/10.1038/ng.3984	+	+	+
HT55_LARGE_INTESTINE	Gene Knock-Out Studies	Gene-Level	https://doi.org/10.1038/ng.3984	+	+	+
HUH1_LIVER	Gene Knock-Out Studies	Gene-Level	https://doi.org/10.1038/ng.3984	+	+	+
HUH6_LIVER	Gene Knock-Out Studies	Gene-Level	https://doi.org/10.1038/ng.3984	+	+	+
HUH7_LIVER	Gene Knock-Out Studies	Gene-Level	https://doi.org/10.1038/ng.3984	+	+	+
HUPT3_PANCREAS	Gene Knock-Out Studies	Gene-Level	https://doi.org/10.1038/ng.3984	+	+	+
IGR1_SKIN	Gene Knock-Out Studies	Gene-Level	https://doi.org/10.1038/ng.3984	+	+	+
IGR39_SKIN	Gene Knock-Out Studies	Gene-Level	https://doi.org/10.1038/ng.3984	+	+	+
IMR32_AUTONOMIC_GANGLIA	Gene Knock-Out Studies	Gene-Level	https://doi.org/10.1038/ng.3984	+	+	+
IPC298_SKIN	Gene Knock-Out Studies	Gene-Level	https://doi.org/10.1038/ng.3984	+	+	+
JHH1_LIVER	Gene Knock-Out Studies	Gene-Level	https://doi.org/10.1038/ng.3984	+	+	+
JHH4_LIVER	Gene Knock-Out Studies	Gene-Level	https://doi.org/10.1038/ng.3984	+	+	+
JHH5_LIVER	Gene Knock-Out Studies	Gene-Level	https://doi.org/10.1038/ng.3984	+	+	+
JHH7_LIVER	Gene Knock-Out Studies	Gene-Level	https://doi.org/10.1038/ng.3984	+	+	+
JHOC5_OVARY	Gene Knock-Out Studies	Gene-Level	https://doi.org/10.1038/ng.3984	+	+	+
JHOM1_OVARY	Gene Knock-Out Studies	Gene-Level	https://doi.org/10.1038/ng.3984	+	+	+
JHOS2_OVARY	Gene Knock-Out Studies	Gene-Level	https://doi.org/10.1038/ng.3984	+	+	+
JHOS4_OVARY	Gene Knock-Out Studies	Gene-Level	https://doi.org/10.1038/ng.3984	+	+	+
JIMT1_BREAST	Gene Knock-Out Studies	Gene-Level	https://doi.org/10.1038/ng.3984	+	+	+
JMSU1_URINARY_TRACT	Gene Knock-Out Studies	Gene-Level	https://doi.org/10.1038/ng.3984	+	+	+
K029AX_SKIN	Gene Knock-Out Studies	Gene-Level	https://doi.org/10.1038/ng.3984	+	+	+
KALS1_CENTRAL_NERVOUS_SYSTEM	Gene Knock-Out Studies	Gene-Level	https://doi.org/10.1038/ng.3984	+	+	+
KARPAS299_HAEMATOPOIETIC_AND_LYMPHOID_TISSUE	Gene Knock-Out Studies	Gene-Level	https://doi.org/10.1038/ng.3984	+	+	+
KELLY_AUTONOMIC_GANGLIA	Gene Knock-Out Studies	Gene-Level	https://doi.org/10.1038/ng.3984	+	+	+
KIJK_HAEMATOPOIETIC_AND_LYMPHOID_TISSUE	Gene Knock-Out Studies	Gene-Level	https://doi.org/10.1038/ng.3984	+	+	+
KLE_ENDOMETRIUM	Gene Knock-Out Studies	Gene-Level	https://doi.org/10.1038/ng.3984	+	+	+
KM12_LARGE_INTESTINE	Gene Knock-Out Studies	Gene-Level	https://doi.org/10.1038/ng.3984	+	+	+
KMBC2_URINARY_TRACT	Gene Knock-Out Studies	Gene-Level	https://doi.org/10.1038/ng.3984	+	+	+
KMRC1_KIDNEY	Gene Knock-Out Studies	Gene-Level	https://doi.org/10.1038/ng.3984	+	+	+
KMRC20_KIDNEY	Gene Knock-Out Studies	Gene-Level	https://doi.org/10.1038/ng.3984	+	+	+
KNS42_CENTRAL_NERVOUS_SYSTEM	Gene Knock-Out Studies	Gene-Level	https://doi.org/10.1038/ng.3984	+	+	+
KNS60_CENTRAL_NERVOUS_SYSTEM	Gene Knock-Out Studies	Gene-Level	https://doi.org/10.1038/ng.3984	+	+	+
KNS62_LUNG	Gene Knock-Out Studies	Gene-Level	https://doi.org/10.1038/ng.3984	+	+	+
KNS81_CENTRAL_NERVOUS_SYSTEM	Gene Knock-Out Studies	Gene-Level	https://doi.org/10.1038/ng.3984	+	+	+
KP2_PANCREAS	Gene Knock-Out Studies	Gene-Level	https://doi.org/10.1038/ng.3984	+	+	+
KP3_PANCREAS	Gene Knock-Out Studies	Gene-Level	https://doi.org/10.1038/ng.3984	+	+	+
KP4_PANCREAS	Gene Knock-Out Studies	Gene-Level	https://doi.org/10.1038/ng.3984	+	+	+
KPL1_BREAST	Gene Knock-Out Studies	Gene-Level	https://doi.org/10.1038/ng.3984	+	+	+
KPNYN_AUTONOMIC_GANGLIA	Gene Knock-Out Studies	Gene-Level	https://doi.org/10.1038/ng.3984	+	+	+
KS1_CENTRAL_NERVOUS_SYSTEM	Gene Knock-Out Studies	Gene-Level	https://doi.org/10.1038/ng.3984	+	+	+
KU1919_URINARY_TRACT	Gene Knock-Out Studies	Gene-Level	https://doi.org/10.1038/ng.3984	+	+	+
KURAMOCHI_OVARY	Gene Knock-Out Studies	Gene-Level	https://doi.org/10.1038/ng.3984	+	+	+
KYSE180_OESOPHAGUS	Gene Knock-Out Studies	Gene-Level	https://doi.org/10.1038/ng.3984	+	+	+
KYSE270_OESOPHAGUS	Gene Knock-Out Studies	Gene-Level	https://doi.org/10.1038/ng.3984	+	+	+
KYSE30_OESOPHAGUS	Gene Knock-Out Studies	Gene-Level	https://doi.org/10.1038/ng.3984	+	+	+
KYSE410_OESOPHAGUS	Gene Knock-Out Studies	Gene-Level	https://doi.org/10.1038/ng.3984	+	+	+
KYSE450_OESOPHAGUS	Gene Knock-Out Studies	Gene-Level	https://doi.org/10.1038/ng.3984	+	+	+
KYSE70_OESOPHAGUS	Gene Knock-Out Studies	Gene-Level	https://doi.org/10.1038/ng.3984	+	+	+
LCLC103H_LUNG	Gene Knock-Out Studies	Gene-Level	https://doi.org/10.1038/ng.3984	+	+	+
LI7_LIVER	Gene Knock-Out Studies	Gene-Level	https://doi.org/10.1038/ng.3984	+	+	+
LK2_LUNG	Gene Knock-Out Studies	Gene-Level	https://doi.org/10.1038/ng.3984	+	+	+
LN18_CENTRAL_NERVOUS_SYSTEM	Gene Knock-Out Studies	Gene-Level	https://doi.org/10.1038/ng.3984	+	+	+
LN235_CENTRAL_NERVOUS_SYSTEM	Gene Knock-Out Studies	Gene-Level	https://doi.org/10.1038/ng.3984	+	+	+
LN382_CENTRAL_NERVOUS_SYSTEM	Gene Knock-Out Studies	Gene-Level	https://doi.org/10.1038/ng.3984	+	+	+
LN443_CENTRAL_NERVOUS_SYSTEM	Gene Knock-Out Studies	Gene-Level	https://doi.org/10.1038/ng.3984	+	+	+
LNZ308_CENTRAL_NERVOUS_SYSTEM	Gene Knock-Out Studies	Gene-Level	https://doi.org/10.1038/ng.3984	+	+	+
LOVO_LARGE_INTESTINE	Gene Knock-Out Studies	Gene-Level	https://doi.org/10.1038/ng.3984	+	+	+
LS1034_LARGE_INTESTINE	Gene Knock-Out Studies	Gene-Level	https://doi.org/10.1038/ng.3984	+	+	+
LS180_LARGE_INTESTINE	Gene Knock-Out Studies	Gene-Level	https://doi.org/10.1038/ng.3984	+	+	+
LS513_LARGE_INTESTINE	Gene Knock-Out Studies	Gene-Level	https://doi.org/10.1038/ng.3984	+	+	+
LUDLU1_LUNG	Gene Knock-Out Studies	Gene-Level	https://doi.org/10.1038/ng.3984	+	+	+
LXF289_LUNG	Gene Knock-Out Studies	Gene-Level	https://doi.org/10.1038/ng.3984	+	+	+
M059K_CENTRAL_NERVOUS_SYSTEM	Gene Knock-Out Studies	Gene-Level	https://doi.org/10.1038/ng.3984	+	+	+
MALME3M_SKIN	Gene Knock-Out Studies	Gene-Level	https://doi.org/10.1038/ng.3984	+	+	+
MCAS_OVARY	Gene Knock-Out Studies	Gene-Level	https://doi.org/10.1038/ng.3984	+	+	+
MDAMB157_BREAST	Gene Knock-Out Studies	Gene-Level	https://doi.org/10.1038/ng.3984	+	+	+
MDAMB231_BREAST	Gene Knock-Out Studies	Gene-Level	https://doi.org/10.1038/ng.3984	+	+	+
MDAMB415_BREAST	Gene Knock-Out Studies	Gene-Level	https://doi.org/10.1038/ng.3984	+	+	+
MDAMB435S_SKIN	Gene Knock-Out Studies	Gene-Level	https://doi.org/10.1038/ng.3984	+	+	+
MDAMB436_BREAST	Gene Knock-Out Studies	Gene-Level	https://doi.org/10.1038/ng.3984	+	+	+
MDAMB453_BREAST	Gene Knock-Out Studies	Gene-Level	https://doi.org/10.1038/ng.3984	+	+	+
MDAMB468_BREAST	Gene Knock-Out Studies	Gene-Level	https://doi.org/10.1038/ng.3984	+	+	+
MDST8_LARGE_INTESTINE	Gene Knock-Out Studies	Gene-Level	https://doi.org/10.1038/ng.3984	+	+	+
MELHO_SKIN	Gene Knock-Out Studies	Gene-Level	https://doi.org/10.1038/ng.3984	+	+	+
MELJUSO_SKIN	Gene Knock-Out Studies	Gene-Level	https://doi.org/10.1038/ng.3984	+	+	+
MFE319_ENDOMETRIUM	Gene Knock-Out Studies	Gene-Level	https://doi.org/10.1038/ng.3984	+	+	+
MHHNB11_AUTONOMIC_GANGLIA	Gene Knock-Out Studies	Gene-Level	https://doi.org/10.1038/ng.3984	+	+	+
MIAPACA2_PANCREAS	Gene Knock-Out Studies	Gene-Level	https://doi.org/10.1038/ng.3984	+	+	+
MKN45_STOMACH	Gene Knock-Out Studies	Gene-Level	https://doi.org/10.1038/ng.3984	+	+	+
MOLM13_HAEMATOPOIETIC_AND_LYMPHOID_TISSUE_2	Gene Knock-Out Studies	Gene-Level	https://doi.org/10.1038/ng.3984	+	+	+
MORCPR_LUNG	Gene Knock-Out Studies	Gene-Level	https://doi.org/10.1038/ng.3984	+	+	+
MV411_HAEMATOPOIETIC_AND_LYMPHOID_TISSUE_2	Gene Knock-Out Studies	Gene-Level	https://doi.org/10.1038/ng.3984	+	+	+
NB1_AUTONOMIC_GANGLIA	Gene Knock-Out Studies	Gene-Level	https://doi.org/10.1038/ng.3984	+	+	+
NB4_HAEMATOPOIETIC_AND_LYMPHOID_TISSUE_2	Gene Knock-Out Studies	Gene-Level	https://doi.org/10.1038/ng.3984	+	+	+
NCIH1299_LUNG	Gene Knock-Out Studies	Gene-Level	https://doi.org/10.1038/ng.3984	+	+	+
NCIH1437_LUNG	Gene Knock-Out Studies	Gene-Level	https://doi.org/10.1038/ng.3984	+	+	+
NCIH1581_LUNG	Gene Knock-Out Studies	Gene-Level	https://doi.org/10.1038/ng.3984	+	+	+
NCIH1650_LUNG	Gene Knock-Out Studies	Gene-Level	https://doi.org/10.1038/ng.3984	+	+	+
NCIH1693_LUNG	Gene Knock-Out Studies	Gene-Level	https://doi.org/10.1038/ng.3984	+	+	+
NCIH1703_LUNG	Gene Knock-Out Studies	Gene-Level	https://doi.org/10.1038/ng.3984	+	+	+
NCIH1792_LUNG	Gene Knock-Out Studies	Gene-Level	https://doi.org/10.1038/ng.3984	+	+	+
NCIH1944_LUNG	Gene Knock-Out Studies	Gene-Level	https://doi.org/10.1038/ng.3984	+	+	+
NCIH2023_LUNG	Gene Knock-Out Studies	Gene-Level	https://doi.org/10.1038/ng.3984	+	+	+
NCIH2030_LUNG	Gene Knock-Out Studies	Gene-Level	https://doi.org/10.1038/ng.3984	+	+	+
NCIH2087_LUNG	Gene Knock-Out Studies	Gene-Level	https://doi.org/10.1038/ng.3984	+	+	+
NCIH2110_LUNG	Gene Knock-Out Studies	Gene-Level	https://doi.org/10.1038/ng.3984	+	+	+
NCIH2122_LUNG	Gene Knock-Out Studies	Gene-Level	https://doi.org/10.1038/ng.3984	+	+	+
NCIH2126_LUNG	Gene Knock-Out Studies	Gene-Level	https://doi.org/10.1038/ng.3984	+	+	+
NCIH2170_LUNG	Gene Knock-Out Studies	Gene-Level	https://doi.org/10.1038/ng.3984	+	+	+
NCIH2172_LUNG	Gene Knock-Out Studies	Gene-Level	https://doi.org/10.1038/ng.3984	+	+	+
NCIH2291_LUNG	Gene Knock-Out Studies	Gene-Level	https://doi.org/10.1038/ng.3984	+	+	+
NCIH23_LUNG	Gene Knock-Out Studies	Gene-Level	https://doi.org/10.1038/ng.3984	+	+	+
NCIH322_LUNG	Gene Knock-Out Studies	Gene-Level	https://doi.org/10.1038/ng.3984	+	+	+
NCIH441_LUNG	Gene Knock-Out Studies	Gene-Level	https://doi.org/10.1038/ng.3984	+	+	+
NCIH460_LUNG	Gene Knock-Out Studies	Gene-Level	https://doi.org/10.1038/ng.3984	+	+	+
NCIH520_LUNG	Gene Knock-Out Studies	Gene-Level	https://doi.org/10.1038/ng.3984	+	+	+
NCIH716_LARGE_INTESTINE	Gene Knock-Out Studies	Gene-Level	https://doi.org/10.1038/ng.3984	+	+	+
NCIH747_LARGE_INTESTINE	Gene Knock-Out Studies	Gene-Level	https://doi.org/10.1038/ng.3984	+	+	+
NCIH838_LUNG	Gene Knock-Out Studies	Gene-Level	https://doi.org/10.1038/ng.3984	+	+	+
NCIN87_STOMACH	Gene Knock-Out Studies	Gene-Level	https://doi.org/10.1038/ng.3984	+	+	+
NOMO1_HAEMATOPOIETIC_AND_LYMPHOID_TISSUE	Gene Knock-Out Studies	Gene-Level	https://doi.org/10.1038/ng.3984	+	+	+
NUGC3_STOMACH	Gene Knock-Out Studies	Gene-Level	https://doi.org/10.1038/ng.3984	+	+	+
OAW28_OVARY	Gene Knock-Out Studies	Gene-Level	https://doi.org/10.1038/ng.3984	+	+	+
OE21_OESOPHAGUS	Gene Knock-Out Studies	Gene-Level	https://doi.org/10.1038/ng.3984	+	+	+
OE33_OESOPHAGUS	Gene Knock-Out Studies	Gene-Level	https://doi.org/10.1038/ng.3984	+	+	+
ONS76_CENTRAL_NERVOUS_SYSTEM	Gene Knock-Out Studies	Gene-Level	https://doi.org/10.1038/ng.3984	+	+	+
OSRC2_KIDNEY	Gene Knock-Out Studies	Gene-Level	https://doi.org/10.1038/ng.3984	+	+	+
OUMS23_LARGE_INTESTINE	Gene Knock-Out Studies	Gene-Level	https://doi.org/10.1038/ng.3984	+	+	+
OV7_OVARY	Gene Knock-Out Studies	Gene-Level	https://doi.org/10.1038/ng.3984	+	+	+
OV90_OVARY	Gene Knock-Out Studies	Gene-Level	https://doi.org/10.1038/ng.3984	+	+	+
OVCAR8_OVARY	Gene Knock-Out Studies	Gene-Level	https://doi.org/10.1038/ng.3984	+	+	+
OVISE_OVARY	Gene Knock-Out Studies	Gene-Level	https://doi.org/10.1038/ng.3984	+	+	+
OVK18_OVARY	Gene Knock-Out Studies	Gene-Level	https://doi.org/10.1038/ng.3984	+	+	+
OVMANA_OVARY	Gene Knock-Out Studies	Gene-Level	https://doi.org/10.1038/ng.3984	+	+	+
OVTOKO_OVARY	Gene Knock-Out Studies	Gene-Level	https://doi.org/10.1038/ng.3984	+	+	+
P31FUJ_HAEMATOPOIETIC_AND_LYMPHOID_TISSUE_2	Gene Knock-Out Studies	Gene-Level	https://doi.org/10.1038/ng.3984	+	+	+
PANC0203_PANCREAS	Gene Knock-Out Studies	Gene-Level	https://doi.org/10.1038/ng.3984	+	+	+
PANC0403_PANCREAS	Gene Knock-Out Studies	Gene-Level	https://doi.org/10.1038/ng.3984	+	+	+
PANC1005_PANCREAS	Gene Knock-Out Studies	Gene-Level	https://doi.org/10.1038/ng.3984	+	+	+
PATU8988S_PANCREAS	Gene Knock-Out Studies	Gene-Level	https://doi.org/10.1038/ng.3984	+	+	+
PC14_LUNG	Gene Knock-Out Studies	Gene-Level	https://doi.org/10.1038/ng.3984	+	+	+
PECAPJ34CLONEC12_UPPER_AERODIGESTIVE_TRACT	Gene Knock-Out Studies	Gene-Level	https://doi.org/10.1038/ng.3984	+	+	+
PF382_HAEMATOPOIETIC_AND_LYMPHOID_TISSUE	Gene Knock-Out Studies	Gene-Level	https://doi.org/10.1038/ng.3984	+	+	+
PK1_PANCREAS	Gene Knock-Out Studies	Gene-Level	https://doi.org/10.1038/ng.3984	+	+	+
PK45H_PANCREAS	Gene Knock-Out Studies	Gene-Level	https://doi.org/10.1038/ng.3984	+	+	+
PK59_PANCREAS	Gene Knock-Out Studies	Gene-Level	https://doi.org/10.1038/ng.3984	+	+	+
PLCPRF5_LIVER	Gene Knock-Out Studies	Gene-Level	https://doi.org/10.1038/ng.3984	+	+	+
PSN1_PANCREAS	Gene Knock-Out Studies	Gene-Level	https://doi.org/10.1038/ng.3984	+	+	+
RCC10RGB_KIDNEY	Gene Knock-Out Studies	Gene-Level	https://doi.org/10.1038/ng.3984	+	+	+
RD_SOFT_TISSUE	Gene Knock-Out Studies	Gene-Level	https://doi.org/10.1038/ng.3984	+	+	+
RERFLCAD1_LUNG	Gene Knock-Out Studies	Gene-Level	https://doi.org/10.1038/ng.3984	+	+	+
RERFLCAI_LUNG	Gene Knock-Out Studies	Gene-Level	https://doi.org/10.1038/ng.3984	+	+	+
RH30_SOFT_TISSUE	Gene Knock-Out Studies	Gene-Level	https://doi.org/10.1038/ng.3984	+	+	+
RKN_SOFT_TISSUE	Gene Knock-Out Studies	Gene-Level	https://doi.org/10.1038/ng.3984	+	+	+
RKO_LARGE_INTESTINE	Gene Knock-Out Studies	Gene-Level	https://doi.org/10.1038/ng.3984	+	+	+
RMUGS_OVARY	Gene Knock-Out Studies	Gene-Level	https://doi.org/10.1038/ng.3984	+	+	+
RPMI7951_SKIN	Gene Knock-Out Studies	Gene-Level	https://doi.org/10.1038/ng.3984	+	+	+
RT112_URINARY_TRACT	Gene Knock-Out Studies	Gene-Level	https://doi.org/10.1038/ng.3984	+	+	+
RT11284_URINARY_TRACT	Gene Knock-Out Studies	Gene-Level	https://doi.org/10.1038/ng.3984	+	+	+
RT4_URINARY_TRACT	Gene Knock-Out Studies	Gene-Level	https://doi.org/10.1038/ng.3984	+	+	+
RVH421_SKIN	Gene Knock-Out Studies	Gene-Level	https://doi.org/10.1038/ng.3984	+	+	+
SCABER_URINARY_TRACT	Gene Knock-Out Studies	Gene-Level	https://doi.org/10.1038/ng.3984	+	+	+
SF295_CENTRAL_NERVOUS_SYSTEM	Gene Knock-Out Studies	Gene-Level	https://doi.org/10.1038/ng.3984	+	+	+
SF767_CENTRAL_NERVOUS_SYSTEM	Gene Knock-Out Studies	Gene-Level	https://doi.org/10.1038/ng.3984	+	+	+
SH10TC_STOMACH	Gene Knock-Out Studies	Gene-Level	https://doi.org/10.1038/ng.3984	+	+	+
SIMA_AUTONOMIC_GANGLIA	Gene Knock-Out Studies	Gene-Level	https://doi.org/10.1038/ng.3984	+	+	+
SJSA1_BONE	Gene Knock-Out Studies	Gene-Level	https://doi.org/10.1038/ng.3984	+	+	+
SKBR3_BREAST	Gene Knock-Out Studies	Gene-Level	https://doi.org/10.1038/ng.3984	+	+	+
SKHEP1_LIVER	Gene Knock-Out Studies	Gene-Level	https://doi.org/10.1038/ng.3984	+	+	+
SKMEL24_SKIN	Gene Knock-Out Studies	Gene-Level	https://doi.org/10.1038/ng.3984	+	+	+
SKMEL30_SKIN	Gene Knock-Out Studies	Gene-Level	https://doi.org/10.1038/ng.3984	+	+	+
SKMES1_LUNG	Gene Knock-Out Studies	Gene-Level	https://doi.org/10.1038/ng.3984	+	+	+
SKNAS_AUTONOMIC_GANGLIA	Gene Knock-Out Studies	Gene-Level	https://doi.org/10.1038/ng.3984	+	+	+
SKNBE2_AUTONOMIC_GANGLIA	Gene Knock-Out Studies	Gene-Level	https://doi.org/10.1038/ng.3984	+	+	+
SKNDZ_AUTONOMIC_GANGLIA	Gene Knock-Out Studies	Gene-Level	https://doi.org/10.1038/ng.3984	+	+	+
SKNFI_AUTONOMIC_GANGLIA	Gene Knock-Out Studies	Gene-Level	https://doi.org/10.1038/ng.3984	+	+	+
SKNMC_BONE	Gene Knock-Out Studies	Gene-Level	https://doi.org/10.1038/ng.3984	+	+	+
SKOV3_OVARY	Gene Knock-Out Studies	Gene-Level	https://doi.org/10.1038/ng.3984	+	+	+
SLR20_KIDNEY	Gene Knock-Out Studies	Gene-Level	https://doi.org/10.1038/ng.3984	+	+	+
SLR23_KIDNEY	Gene Knock-Out Studies	Gene-Level	https://doi.org/10.1038/ng.3984	+	+	+
SLR26_KIDNEY	Gene Knock-Out Studies	Gene-Level	https://doi.org/10.1038/ng.3984	+	+	+
SNGM_ENDOMETRIUM	Gene Knock-Out Studies	Gene-Level	https://doi.org/10.1038/ng.3984	+	+	+
SNU1_STOMACH	Gene Knock-Out Studies	Gene-Level	https://doi.org/10.1038/ng.3984	+	+	+
SNU201_CENTRAL_NERVOUS_SYSTEM	Gene Knock-Out Studies	Gene-Level	https://doi.org/10.1038/ng.3984	+	+	+
SNU213_PANCREAS	Gene Knock-Out Studies	Gene-Level	https://doi.org/10.1038/ng.3984	+	+	+
SNU349_KIDNEY	Gene Knock-Out Studies	Gene-Level	https://doi.org/10.1038/ng.3984	+	+	+
SNU398_LIVER	Gene Knock-Out Studies	Gene-Level	https://doi.org/10.1038/ng.3984	+	+	+
SNU410_PANCREAS	Gene Knock-Out Studies	Gene-Level	https://doi.org/10.1038/ng.3984	+	+	+
SNU449_LIVER	Gene Knock-Out Studies	Gene-Level	https://doi.org/10.1038/ng.3984	+	+	+
SNU503_LARGE_INTESTINE	Gene Knock-Out Studies	Gene-Level	https://doi.org/10.1038/ng.3984	+	+	+
SNU685_ENDOMETRIUM	Gene Knock-Out Studies	Gene-Level	https://doi.org/10.1038/ng.3984	+	+	+
SNU8_OVARY	Gene Knock-Out Studies	Gene-Level	https://doi.org/10.1038/ng.3984	+	+	+
SNU840_OVARY	Gene Knock-Out Studies	Gene-Level	https://doi.org/10.1038/ng.3984	+	+	+
SUIT2_PANCREAS	Gene Knock-Out Studies	Gene-Level	https://doi.org/10.1038/ng.3984	+	+	+
SUPM2_HAEMATOPOIETIC_AND_LYMPHOID_TISSUE	Gene Knock-Out Studies	Gene-Level	https://doi.org/10.1038/ng.3984	+	+	+
SUPT1_HAEMATOPOIETIC_AND_LYMPHOID_TISSUE	Gene Knock-Out Studies	Gene-Level	https://doi.org/10.1038/ng.3984	+	+	+
SW1463_LARGE_INTESTINE	Gene Knock-Out Studies	Gene-Level	https://doi.org/10.1038/ng.3984	+	+	+
SW403_LARGE_INTESTINE	Gene Knock-Out Studies	Gene-Level	https://doi.org/10.1038/ng.3984	+	+	+
SW48_LARGE_INTESTINE	Gene Knock-Out Studies	Gene-Level	https://doi.org/10.1038/ng.3984	+	+	+
SW620_LARGE_INTESTINE	Gene Knock-Out Studies	Gene-Level	https://doi.org/10.1038/ng.3984	+	+	+
SW837_LARGE_INTESTINE	Gene Knock-Out Studies	Gene-Level	https://doi.org/10.1038/ng.3984	+	+	+
T24_URINARY_TRACT	Gene Knock-Out Studies	Gene-Level	https://doi.org/10.1038/ng.3984	+	+	+
T3M4_PANCREAS	Gene Knock-Out Studies	Gene-Level	https://doi.org/10.1038/ng.3984	+	+	+
T84_LARGE_INTESTINE	Gene Knock-Out Studies	Gene-Level	https://doi.org/10.1038/ng.3984	+	+	+
T98G_CENTRAL_NERVOUS_SYSTEM	Gene Knock-Out Studies	Gene-Level	https://doi.org/10.1038/ng.3984	+	+	+
TCCPAN2_PANCREAS	Gene Knock-Out Studies	Gene-Level	https://doi.org/10.1038/ng.3984	+	+	+
TCCSUP_URINARY_TRACT	Gene Knock-Out Studies	Gene-Level	https://doi.org/10.1038/ng.3984	+	+	+
TE1_OESOPHAGUS	Gene Knock-Out Studies	Gene-Level	https://doi.org/10.1038/ng.3984	+	+	+
TE5_OESOPHAGUS	Gene Knock-Out Studies	Gene-Level	https://doi.org/10.1038/ng.3984	+	+	+
TEN_ENDOMETRIUM	Gene Knock-Out Studies	Gene-Level	https://doi.org/10.1038/ng.3984	+	+	+
TF1_HAEMATOPOIETIC_AND_LYMPHOID_TISSUE_2	Gene Knock-Out Studies	Gene-Level	https://doi.org/10.1038/ng.3984	+	+	+
THP1_HAEMATOPOIETIC_AND_LYMPHOID_TISSUE_2	Gene Knock-Out Studies	Gene-Level	https://doi.org/10.1038/ng.3984	+	+	+
TOV21G_OVARY	Gene Knock-Out Studies	Gene-Level	https://doi.org/10.1038/ng.3984	+	+	+
TUHR10TKB_KIDNEY	Gene Knock-Out Studies	Gene-Level	https://doi.org/10.1038/ng.3984	+	+	+
TUHR4TKB_KIDNEY	Gene Knock-Out Studies	Gene-Level	https://doi.org/10.1038/ng.3984	+	+	+
U118MG_CENTRAL_NERVOUS_SYSTEM	Gene Knock-Out Studies	Gene-Level	https://doi.org/10.1038/ng.3984	+	+	+
U178_CENTRAL_NERVOUS_SYSTEM	Gene Knock-Out Studies	Gene-Level	https://doi.org/10.1038/ng.3984	+	+	+
U251MG_CENTRAL_NERVOUS_SYSTEM	Gene Knock-Out Studies	Gene-Level	https://doi.org/10.1038/ng.3984	+	+	+
U2OS_BONE	Gene Knock-Out Studies	Gene-Level	https://doi.org/10.1038/ng.3984	+	+	+
U343_CENTRAL_NERVOUS_SYSTEM	Gene Knock-Out Studies	Gene-Level	https://doi.org/10.1038/ng.3984	+	+	+
U87MG_CENTRAL_NERVOUS_SYSTEM	Gene Knock-Out Studies	Gene-Level	https://doi.org/10.1038/ng.3984	+	+	+
U937_HAEMATOPOIETIC_AND_LYMPHOID_TISSUE	Gene Knock-Out Studies	Gene-Level	https://doi.org/10.1038/ng.3984	+	+	+
UACC257_SKIN	Gene Knock-Out Studies	Gene-Level	https://doi.org/10.1038/ng.3984	+	+	+
UACC62_SKIN	Gene Knock-Out Studies	Gene-Level	https://doi.org/10.1038/ng.3984	+	+	+
UMUC3_URINARY_TRACT	Gene Knock-Out Studies	Gene-Level	https://doi.org/10.1038/ng.3984	+	+	+
UOK101_KIDNEY	Gene Knock-Out Studies	Gene-Level	https://doi.org/10.1038/ng.3984	+	+	+
VMCUB1_URINARY_TRACT	Gene Knock-Out Studies	Gene-Level	https://doi.org/10.1038/ng.3984	+	+	+
WM115_SKIN	Gene Knock-Out Studies	Gene-Level	https://doi.org/10.1038/ng.3984	+	+	+
WM1799_SKIN	Gene Knock-Out Studies	Gene-Level	https://doi.org/10.1038/ng.3984	+	+	+
WM2664_SKIN	Gene Knock-Out Studies	Gene-Level	https://doi.org/10.1038/ng.3984	+	+	+
WM793_SKIN	Gene Knock-Out Studies	Gene-Level	https://doi.org/10.1038/ng.3984	+	+	+
WM983B_SKIN	Gene Knock-Out Studies	Gene-Level	https://doi.org/10.1038/ng.3984	+	+	+
YAPC_PANCREAS	Gene Knock-Out Studies	Gene-Level	https://doi.org/10.1038/ng.3984	+	+	+
YKG1_CENTRAL_NERVOUS_SYSTEM	Gene Knock-Out Studies	Gene-Level	https://doi.org/10.1038/ng.3984	+	+	+
ZR751_BREAST	Gene Knock-Out Studies	Gene-Level	https://doi.org/10.1038/ng.3984	+	+	+
Adipose_Subcutaneous	Gene Expression	Gene-Level	https://www.gtexportal.org/home/downloads/adult-gtex/bulk_tissue_expression	+	+	+
Adipose_Visceral_Omentum	Gene Expression	Gene-Level	https://www.gtexportal.org/home/downloads/adult-gtex/bulk_tissue_expression	+	+	+
Adrenal_Gland	Gene Expression	Gene-Level	https://www.gtexportal.org/home/downloads/adult-gtex/bulk_tissue_expression	+	+	+
Artery_Aorta	Gene Expression	Gene-Level	https://www.gtexportal.org/home/downloads/adult-gtex/bulk_tissue_expression	+	+	+
Artery_Coronary	Gene Expression	Gene-Level	https://www.gtexportal.org/home/downloads/adult-gtex/bulk_tissue_expression	+	+	+
Artery_Tibial	Gene Expression	Gene-Level	https://www.gtexportal.org/home/downloads/adult-gtex/bulk_tissue_expression	+	+	+
Bladder	Gene Expression	Gene-Level	https://www.gtexportal.org/home/downloads/adult-gtex/bulk_tissue_expression	+	+	+
Brain_Amygdala	Gene Expression	Gene-Level	https://www.gtexportal.org/home/downloads/adult-gtex/bulk_tissue_expression	+	+	+
Brain_Anterior_cingulate_cortex_BA24	Gene Expression	Gene-Level	https://www.gtexportal.org/home/downloads/adult-gtex/bulk_tissue_expression	+	+	+
Brain_Caudate_basal_ganglia	Gene Expression	Gene-Level	https://www.gtexportal.org/home/downloads/adult-gtex/bulk_tissue_expression	+	+	+
Brain_Cerebellar_Hemisphere	Gene Expression	Gene-Level	https://www.gtexportal.org/home/downloads/adult-gtex/bulk_tissue_expression	+	+	+
Brain_Cerebellum	Gene Expression	Gene-Level	https://www.gtexportal.org/home/downloads/adult-gtex/bulk_tissue_expression	+	+	+
Brain_Cortex	Gene Expression	Gene-Level	https://www.gtexportal.org/home/downloads/adult-gtex/bulk_tissue_expression	+	+	+
Brain_Frontal_Cortex_BA9	Gene Expression	Gene-Level	https://www.gtexportal.org/home/downloads/adult-gtex/bulk_tissue_expression	+	+	+
Brain_Hippocampus	Gene Expression	Gene-Level	https://www.gtexportal.org/home/downloads/adult-gtex/bulk_tissue_expression	+	+	+
Brain_Hypothalamus	Gene Expression	Gene-Level	https://www.gtexportal.org/home/downloads/adult-gtex/bulk_tissue_expression	+	+	+
Brain_Nucleus_accumbens_basal_ganglia	Gene Expression	Gene-Level	https://www.gtexportal.org/home/downloads/adult-gtex/bulk_tissue_expression	+	+	+
Brain_Putamen_basal_ganglia	Gene Expression	Gene-Level	https://www.gtexportal.org/home/downloads/adult-gtex/bulk_tissue_expression	+	+	+
Brain_Spinal_cord_cervical_c-1	Gene Expression	Gene-Level	https://www.gtexportal.org/home/downloads/adult-gtex/bulk_tissue_expression	+	+	+
Brain_Substantia_nigra	Gene Expression	Gene-Level	https://www.gtexportal.org/home/downloads/adult-gtex/bulk_tissue_expression	+	+	+
Breast_Mammary_Tissue	Gene Expression	Gene-Level	https://www.gtexportal.org/home/downloads/adult-gtex/bulk_tissue_expression	+	+	+
Cells_Cultured_fibroblasts	Gene Expression	Gene-Level	https://www.gtexportal.org/home/downloads/adult-gtex/bulk_tissue_expression	+	+	+
Cells_EBV-transformed_lymphocytes	Gene Expression	Gene-Level	https://www.gtexportal.org/home/downloads/adult-gtex/bulk_tissue_expression	+	+	+
Cervix_Ectocervix	Gene Expression	Gene-Level	https://www.gtexportal.org/home/downloads/adult-gtex/bulk_tissue_expression	+	+	+
Cervix_Endocervix	Gene Expression	Gene-Level	https://www.gtexportal.org/home/downloads/adult-gtex/bulk_tissue_expression	+	+	+
Colon_Sigmoid	Gene Expression	Gene-Level	https://www.gtexportal.org/home/downloads/adult-gtex/bulk_tissue_expression	+	+	+
Colon_Transverse	Gene Expression	Gene-Level	https://www.gtexportal.org/home/downloads/adult-gtex/bulk_tissue_expression	+	+	+
Colon_Transverse_Mixed_Cell	Gene Expression	Gene-Level	https://www.gtexportal.org/home/downloads/adult-gtex/bulk_tissue_expression	+	+	+
Colon_Transverse_Mucosa	Gene Expression	Gene-Level	https://www.gtexportal.org/home/downloads/adult-gtex/bulk_tissue_expression	+	+	+
Colon_Transverse_Muscularis	Gene Expression	Gene-Level	https://www.gtexportal.org/home/downloads/adult-gtex/bulk_tissue_expression	+	+	+
Esophagus_Gastroesophageal_Junction	Gene Expression	Gene-Level	https://www.gtexportal.org/home/downloads/adult-gtex/bulk_tissue_expression	+	+	+
Esophagus_Mucosa	Gene Expression	Gene-Level	https://www.gtexportal.org/home/downloads/adult-gtex/bulk_tissue_expression	+	+	+
Esophagus_Muscularis	Gene Expression	Gene-Level	https://www.gtexportal.org/home/downloads/adult-gtex/bulk_tissue_expression	+	+	+
Fallopian_Tube	Gene Expression	Gene-Level	https://www.gtexportal.org/home/downloads/adult-gtex/bulk_tissue_expression	+	+	+
Heart_Atrial_Appendage	Gene Expression	Gene-Level	https://www.gtexportal.org/home/downloads/adult-gtex/bulk_tissue_expression	+	+	+
Heart_Left_Ventricle	Gene Expression	Gene-Level	https://www.gtexportal.org/home/downloads/adult-gtex/bulk_tissue_expression	+	+	+
Kidney_Cortex	Gene Expression	Gene-Level	https://www.gtexportal.org/home/downloads/adult-gtex/bulk_tissue_expression	+	+	+
Kidney_Medulla	Gene Expression	Gene-Level	https://www.gtexportal.org/home/downloads/adult-gtex/bulk_tissue_expression	+	+	+
Liver	Gene Expression	Gene-Level	https://www.gtexportal.org/home/downloads/adult-gtex/bulk_tissue_expression	+	+	+
Liver_Hepatocyte	Gene Expression	Gene-Level	https://www.gtexportal.org/home/downloads/adult-gtex/bulk_tissue_expression	+	+	+
Liver_Mixed_Cell	Gene Expression	Gene-Level	https://www.gtexportal.org/home/downloads/adult-gtex/bulk_tissue_expression	+	+	+
Liver_Portal_Tract	Gene Expression	Gene-Level	https://www.gtexportal.org/home/downloads/adult-gtex/bulk_tissue_expression	+	+	+
Lung	Gene Expression	Gene-Level	https://www.gtexportal.org/home/downloads/adult-gtex/bulk_tissue_expression	+	+	+
Minor_Salivary_Gland	Gene Expression	Gene-Level	https://www.gtexportal.org/home/downloads/adult-gtex/bulk_tissue_expression	+	+	+
Muscle_Skeletal	Gene Expression	Gene-Level	https://www.gtexportal.org/home/downloads/adult-gtex/bulk_tissue_expression	+	+	+
Nerve_Tibial	Gene Expression	Gene-Level	https://www.gtexportal.org/home/downloads/adult-gtex/bulk_tissue_expression	+	+	+
Ovary	Gene Expression	Gene-Level	https://www.gtexportal.org/home/downloads/adult-gtex/bulk_tissue_expression	+	+	+
Pancreas	Gene Expression	Gene-Level	https://www.gtexportal.org/home/downloads/adult-gtex/bulk_tissue_expression	+	+	+
Pancreas_Acini	Gene Expression	Gene-Level	https://www.gtexportal.org/home/downloads/adult-gtex/bulk_tissue_expression	+	+	+
Pancreas_Islets	Gene Expression	Gene-Level	https://www.gtexportal.org/home/downloads/adult-gtex/bulk_tissue_expression	+	+	+
Pancreas_Mixed_Cell	Gene Expression	Gene-Level	https://www.gtexportal.org/home/downloads/adult-gtex/bulk_tissue_expression	+	+	+
Pituitary	Gene Expression	Gene-Level	https://www.gtexportal.org/home/downloads/adult-gtex/bulk_tissue_expression	+	+	+
Prostate	Gene Expression	Gene-Level	https://www.gtexportal.org/home/downloads/adult-gtex/bulk_tissue_expression	+	+	+
Skin_Not_Sun_Exposed_Suprapubic	Gene Expression	Gene-Level	https://www.gtexportal.org/home/downloads/adult-gtex/bulk_tissue_expression	+	+	+
Skin_Sun_Exposed_Lower_leg	Gene Expression	Gene-Level	https://www.gtexportal.org/home/downloads/adult-gtex/bulk_tissue_expression	+	+	+
Small_Intestine_Terminal_Ileum	Gene Expression	Gene-Level	https://www.gtexportal.org/home/downloads/adult-gtex/bulk_tissue_expression	+	+	+
Small_Intestine_Terminal_Ileum_Lymphode_Aggregate	Gene Expression	Gene-Level	https://www.gtexportal.org/home/downloads/adult-gtex/bulk_tissue_expression	+	+	+
Small_Intestine_Terminal_Ileum_Mixed_Cell	Gene Expression	Gene-Level	https://www.gtexportal.org/home/downloads/adult-gtex/bulk_tissue_expression	+	+	+
Spleen	Gene Expression	Gene-Level	https://www.gtexportal.org/home/downloads/adult-gtex/bulk_tissue_expression	+	+	+
Stomach	Gene Expression	Gene-Level	https://www.gtexportal.org/home/downloads/adult-gtex/bulk_tissue_expression	+	+	+
Stomach_Mixed_Cell	Gene Expression	Gene-Level	https://www.gtexportal.org/home/downloads/adult-gtex/bulk_tissue_expression	+	+	+
Stomach_Mucosa	Gene Expression	Gene-Level	https://www.gtexportal.org/home/downloads/adult-gtex/bulk_tissue_expression	+	+	+
Stomach_Muscularis	Gene Expression	Gene-Level	https://www.gtexportal.org/home/downloads/adult-gtex/bulk_tissue_expression	+	+	+
Testis	Gene Expression	Gene-Level	https://www.gtexportal.org/home/downloads/adult-gtex/bulk_tissue_expression	+	+	+
Thyroid	Gene Expression	Gene-Level	https://www.gtexportal.org/home/downloads/adult-gtex/bulk_tissue_expression	+	+	+
Uterus	Gene Expression	Gene-Level	https://www.gtexportal.org/home/downloads/adult-gtex/bulk_tissue_expression	+	+	+
Vagina	Gene Expression	Gene-Level	https://www.gtexportal.org/home/downloads/adult-gtex/bulk_tissue_expression	+	+	+
Whole_Blood	Gene Expression	Gene-Level	https://www.gtexportal.org/home/downloads/adult-gtex/bulk_tissue_expression	+	+	+
rel_pos_aa	Structural	Residue-Level	This study	+	+	+
RSA	Structural	Residue-Level	This study	+	+	+
HBonds	Structural	Residue-Level	This study	+	+	+
contact_number_6A	Structural	Residue-Level	This study	+	+	+
contact_number_8A	Structural	Residue-Level	This study	+	+	+
contact_number_10A	Structural	Residue-Level	This study	+	+	+
contact_number_12A	Structural	Residue-Level	This study	+	+	+
SS_H	Structural	Residue-Level	This study	+	+	+
SS_B	Structural	Residue-Level	This study	+	+	+
SS_E	Structural	Residue-Level	This study	+	+	+
SS_G	Structural	Residue-Level	This study	+	+	+
SS_I	Structural	Residue-Level	This study	+	+	+
SS_T	Structural	Residue-Level	This study	+	+	+
SS_S	Structural	Residue-Level	This study	+	+	+
SS_-	Structural	Residue-Level	This study	+	+	+
FoldX_dG	Structural	Gene-Level	This study	+	+	+
esm2_mean_log_likelihood_difference	Protein Language Model-Derived	Mutation-Level	This study	+	+	+
esm2_perplexity_difference	Protein Language Model-Derived	Mutation-Level	This study	+	+	+
esm2_cosine_similarity	Protein Language Model-Derived	Mutation-Level	This study	+	+	+
esm2_avg_abs_difference	Protein Language Model-Derived	Mutation-Level	This study	+	+	+

## Sheet: Supplementary Table 3
#Supplementary Table 3. Average feature importance by feature type for FuncVEP and ClinVEP models.
All features								Feature types
Feature	FuncVEP_CTI	FuncVEP_CTE	FuncVEP_SP	ClinVEP_CTI	ClinVEP_CTE	ClinVEP_SP		Feature_Type	FuncVEP_CTI	ClinVEP_CTI	FuncVEP_CTE	ClinVEP_CTE	FuncVEP_SP	ClinVEP_SP
143B_BONE	0.000773685	0.00339317	0.00464424	0.0301734	0.00443322	0.00325921		Amino Acid Conversion Matrix	0.0101589	0.0217045	0.0194513	0.0230584	0.0337119	0.0473096
42MGBA_CENTRAL_NERVOUS_SYSTEM	0.00290798	0.00412229	0.00281513	0.00196466	0.00296199	0.00522075		Clinical-Trained Meta Predictor	0.141305	0.256332	0	0	0	0
5637_URINARY_TRACT	0.00156576	0.00542239	0.00603395	0.00526895	0.000520113	0.000983316		Clinical-Trained Single Predictor	0.150855	0.129864	0	0	0	0
59M_OVARY	0.00186961	0.00418546	0.00353134	0.00146625	0.00105732	0.0013704		Conservation Score-Based	0.00775584	0.0173549	0.0195994	0.0223642	0.0794442	0.120023
639V_URINARY_TRACT	0.00490085	0.00205894	0.00427824	0.00280648	0.00221571	0.00106065		Constraint Score-Based	0.0147544	0.0322427	0.0265839	0.0605022	0.0687259	0.141327
647V_URINARY_TRACT	0.000862108	0.00153703	0.00508276	0.00212056	0.00198218	0.00364736		Gene Expression	0.00339873	0.00494065	0.00589261	0.00265188	0.00755297	0.00431136
769P_KIDNEY	0.00150323	0.00297742	0.00234164	0.00131554	0.00153829	0.00167413		Gene Knock-Out Studies	0.00303386	0.00429955	0.00449759	0.00254874	0.00535539	0.00351037
786O_KIDNEY	0.00188338	0.00187885	0.00194507	0.00186984	0.00237288	0.00192039		Gene constraint score-based	0.0139224	0.0675623	0.0190532	0.0283217	0.028077	0.0277441
8305C_THYROID	0.0057792	0.0370353	0.0190055	0	0.00266514	0.0025859		Population-Free	0.0538294	0.050833	0.153819	0.215738	0	0
8MGBA_CENTRAL_NERVOUS_SYSTEM	0.00350194	0.0073282	0.0177481	0	0.00139497	0.00387177		Population-Tuned	0.107724	0.076461	0.239897	0.31574	0	0
A2058_SKIN	0.00219178	0.000819927	0.00126049	0.00122767	0.0030793	0.0019556		Protein Language Model-Derived	0.0512627	0.0852944	0.0950016	0.106875	0.339765	0.426214
A2780_OVARY	0.00331772	0.00364012	0.00139405	0.000749911	0.00143927	0.00117284		Structural	0.00963616	0.0276104	0.0223509	0.0165351	0.0571304	0.0602797
A375_SKIN	0.00205726	0.00526785	0.00767839	0.00611574	0.00303022	0.0045412
A549_LUNG	0.000648508	0.00174408	0.00307578	0.000464004	0.00176228	0.00241914
A673_BONE	0.00122974	0.00290775	0.00227643	0.00496691	0.00212335	0.00318568
ABC1_LUNG	0.0101928	0.0166471	0.0157181	0	0.00286202	0.01197
AGS_STOMACH	0.00349755	0.00546041	0.00519101	0.015106	0.00553057	0.00359674
ASPC1_PANCREAS	0.0037657	0.00420636	0.00491649	0.00749914	0.00104956	0.00335116
AU565_BREAST	0.0033045	0.0236701	0.0179793	0.00271765	0.00101777	0.00631771
Adipose_Subcutaneous	0.00550227	0.00965024	0.0067747	0.0100968	0.00118223	0.00344066
Adipose_Visceral_Omentum	0.00401982	0.00252864	0.00469389	0.00038096	0.00320834	0.00232652
Adrenal_Gland	0.00167999	0.00486633	0.00353946	0.00151009	0.00291625	0.00864195
AlphScore	0.0459902	0.147105		0.0294781	0.367175
AlphaMissense_score	0.593157	1.08588		0.377883	1.40236
Artery_Aorta	0.00175135	0.0036131	0.00552494	0.00320141	0.00335825	0.00600749
Artery_Coronary	0.00226437	0.00304787	0.00250347	0.000260209	0.00246613	0.00406169
Artery_Tibial	0.00249824	0.00291389	0.00912904	0	0.000318362	0.00319524
Atchley_f1	0.0094752	0.0264065	0.033292	0.0406266	0.0626298	0.0415118
Atchley_f2	0.0129446	0.0248293	0.0336279	0.00850789	0.00872794	0.0129332
Atchley_f3	0.00926351	0.013382	0.0183212	0.022943	0.0123376	0.0172973
Atchley_f4	0.00940273	0.0162151	0.0189653	0.00679904	0.0183802	0.0254409
Atchley_f5	0.00702937	0.048696	0.0537523	0.00862711	0.0394876	0.044913
BC3C_URINARY_TRACT	0.00901964	0.00505615	0.00352936	0	0.00298804	0.0022036
BFTC905_URINARY_TRACT	0.000625485	0.00256263	0.00372977	0	0.00144072	0.000498019
BFTC909_KIDNEY	0.000643082	0.00479366	0.00326958	0.00432157	0.00127169	0.00303786
BHY_UPPER_AERODIGESTIVE_TRACT	0.00284675	0.00140086	0.00108958	0.00240709	0.00268724	0.00407198
BICR22_UPPER_AERODIGESTIVE_TRACT	0.00258522	0.0014475	0.00208059	0.0011599	0.00387249	0.00456222
BICR6_UPPER_AERODIGESTIVE_TRACT	0.0012318	0.00105766	0.00705312	0	0.00279295	0.00490246
BLOSUM62	0.00102413	0.00114261	0.0141337	0.000327518	0.00107509	0.0228256
BLOSUM70	0.00131172	0.00657776	0.0700932	0.00194263	0.0097875	0.020729
BLOSUM80	0.00240695	0.00328865	0.0146296	0.000427944	0.0187622	0.0568019
BT549_BREAST	0.00459385	0.0120062	0.0103494	0.000465154	0.00437113	0.00337933
BXPC3_PANCREAS	0.00177507	0.00286975	0.00328298	0.00783343	0.00363468	0.00203824
Bladder	0.00146554	0.00365383	0.00115324	0	0	0.00275384
Brain_Amygdala	0.00100284	0.00794343	0.00603004	0.00306401	0.00282096	0.00663232
Brain_Anterior_cingulate_cortex_BA24	0.00370505	0.0051169	0.00697752	0	0.00258918	0.00222774
Brain_Caudate_basal_ganglia	0.00228955	0.0166316	0.00695861	0.00457746	0.00166587	0.00816933
Brain_Cerebellar_Hemisphere	0.00232556	0.0103267	0.0178925	0.00110099	0.00464597	0.00597569
Brain_Cerebellum	0.00103843	0.00996397	0.0109629	0.0034586	0.0023682	0.00343545
Brain_Cortex	0.00119513	0.00351514	0.00328179	0	0.00198089	0.00391648
Brain_Frontal_Cortex_BA9	0.00125502	0.00324767	0.00203635	0.0078148	0.00373963	0.00439715
Brain_Hippocampus	0.00215043	0.00346159	0.00570265	0.00603659	0.00241203	0.00440031
Brain_Hypothalamus	0.00318816	0.00874218	0.010696	0.0222688	0.00162641	0.00900108
Brain_Nucleus_accumbens_basal_ganglia	0.00183057	0.00237358	0.00483471	0	0.00390188	0.00447973
Brain_Putamen_basal_ganglia	0.00271867	0.00605371	0.0139149	0.00697959	0.00367243	0.00972486
Brain_Spinal_cord_cervical_c-1	0.00534648	0.00366732	0.00809935	0.00678932	0.00667409	0.00470975
Brain_Substantia_nigra	0.00558758	0.00657385	0.00860351	0.00710835	0.0016591	0.00485817
Breast_Mammary_Tissue	0.004273	0.00434504	0.00414659	0	0.00153443	0.0016043
C2BBE1_LARGE_INTESTINE	0.00313023	0.00246064	0.00397253	0.0117183	0.00303232	0.00163115
C32_SKIN	0.00131779	0.00168054	0.00283288	0.0013211	0.00297269	0.00293855
CADD_raw	0.00682672			0.0125526
CADOES1_BONE	0.00122216	0.00223751	0.00235689	0.00403329	0.00150179	0.00296579
CAKI1_KIDNEY	0.00213673	0.00203993	0.00448906	0	0.00108456	0.00110566
CAKI2_KIDNEY	0.00334683	0.00488047	0.00227214	0.0127666	0.0012228	0.00381855
CAL120_BREAST	0.0037866	0.00751505	0.0111195	0.00967219	0.00142935	0.00410924
CAL27_UPPER_AERODIGESTIVE_TRACT	0.0134253	0.0157716	0.00491173	0.00650763	0.00194091	0.00353076
CAL29_URINARY_TRACT	0.000997494	0.0114564	0.00219716	0	0.00172468	0.0027068
CAL51_BREAST	0.00230118	0.00157327	0.00242957	0.00496724	0.00104788	0.00192663
CAL78_BONE	0.00713971	0.00293103	0.00515311	0.00152854	0.00294561	0.00248837
CALU6_LUNG	0.000280233	0.00413506	0.00689086	0.00173332	0.00199478	0.00135948
CAMA1_BREAST	0.00145275	0.000863733	0.00384968	0.00052822	0.00139031	0.00196714
CAOV3_OVARY	0.00172959	0.0028183	0.00589319	0.0289996	0.00277088	0.00153262
CAS1_CENTRAL_NERVOUS_SYSTEM	0.00131499	0.00890643	0.00677608	0.0021041	0.00392713	0.00238509
CCFSTTG1_CENTRAL_NERVOUS_SYSTEM	0.00182853	0.00362573	0.00387802	0.000391275	0.00430068	0.0062259
CCK81_LARGE_INTESTINE	0.0040237	0.00315536	0.00500597	0	0.00160014	0.00332204
CFPAC1_PANCREAS	0.000831175	0.00174479	0.00349816	0.00416011	0.00275517	0.00517074
CHAGOK1_LUNG	0.00260539	0.00148684	0.0052111	0.000517665	0.000175537	0.0034984
CHP212_AUTONOMIC_GANGLIA	0.00386235	0.0163571	0.00543538	0	0.00175255	0.00153627
CJM_SKIN	0.00201911	0.00167923	0.00209493	0	0.00171157	0.00113711
CL40_LARGE_INTESTINE	0.00272889	0.00353375	0.00442473	0.0244335	0.00332039	0.00311535
COLO678_LARGE_INTESTINE	0.00573266	0.00596263	0.00607324	0.00591176	0.00441636	0.00543815
COLO679_SKIN	0.00132299	0.00670845	0.00254662	0.00304335	0.00195463	0.00332678
COLO741_SKIN	0.00312983	0.00305569	0.00309515	0.0011728	0.00478939	0.00267237
COLO792_SKIN	0.00106138	0.0101167	0.00287605	0	0.00433095	0.00768735
COLO800_SKIN	0.00658915	0.00636918	0.00871851	0	0.00563003	0.00309573
CORL105_LUNG	0.00442383	0.00245356	0.00411503	0.00161162	0.00191532	0.00551854
CORL279_LUNG	0.0105292	0.00679449	0.00512159	0.002448	0.00187663	0.00278028
CORL47_LUNG	0.00213478	0.00404603	0.00857276	0.00223102	0.00134548	0.00579475
COV318_OVARY	0.011014	0.00540003	0.00631194	0.00414898	0.000790109	0.00389016
COV362_OVARY	0.00904179	0.00650216	0.0053457	0.00186176	0.000197029	0.00486435
COV434_OVARY	0.00254998	0.00198322	0.00281246	0.00205718	0.00153022	0.00150604
COV504_OVARY	0.00618378	0.0109711	0.011714	0.00375831	0.00321435	0.00271426
COV644_OVARY	0.00165496	0.00250627	0.003617	0	0.0012265	0.00306922
Cells_Cultured_fibroblasts	0.00277402	0.00775158	0.0117391	0.00446231	0.00305026	0.00849953
Cells_EBV-transformed_lymphocytes	0.00315798	0.00819303	0.0145893	0.00931232	0.00431332	0.00565905
Cervix_Ectocervix	0.00135513	0.00324676	0.00167126	0.001164	0.00102025	0.00315451
Cervix_Endocervix	0.00138821	0.00304449	0.00236068	0.000741226	0.000359052	0.00231828
ClinPred_score	0.902865			3.95734
Colon_Sigmoid	0.000509651	0.00418333	0.00643122	0.0111347	0.0028785	0.00533555
Colon_Transverse	0.0128296	0.0041669	0.00364881	0	0.000971797	0.00386978
Colon_Transverse_Mixed_Cell	0.00411788	0.00369937	0.0101022	0	0.0016625	0.00443367
Colon_Transverse_Mucosa	0.0137991	0.0053894	0.0125172	0.00228172	0.00609021	0.00322968
Colon_Transverse_Muscularis	0.00271469	0.010744	0.0105787	0.00451669	0.00344873	0.00747
D283MED_CENTRAL_NERVOUS_SYSTEM	0.00549486	0.00818782	0.0104633	0.00171577	0.00299189	0.00436169
D341MED_CENTRAL_NERVOUS_SYSTEM	0.00160333	0.00150687	0.00150797	0.000369892	0.00231083	0.00346106
DANG_PANCREAS	0.0069826	0.00254911	0.00336968	0.00643688	0.00271672	0.00154001
DAOY_CENTRAL_NERVOUS_SYSTEM	0.0140836	0.00637547	0.00798626	0.00406084	0.00316763	0.00148934
DEOGEN2_score	0.0167964			0.0645153
DETROIT562_UPPER_AERODIGESTIVE_TRACT	0.00368856	0.00444516	0.00883071	0	0.00354716	0.0120232
DKMG_CENTRAL_NERVOUS_SYSTEM	0.00224986	0.00465762	0.00692608	0	0.00197168	0.00174107
DLD1_LARGE_INTESTINE	0.00107165	0.00234031	0.00144468	0.000944581	0.00251606	0.00127156
DU4475_BREAST	0.00368806	0.00377048	0.00226349	0	0	0.00160633
EFM19_BREAST	0.0021991	0.0115737	0.0108867	0.008529	0.00230845	0.00326943
EFO21_OVARY	0.00264724	0.00524954	0.0120606	0.000998053	0.00849339	0.00127453
EFO27_OVARY	0.00100946	0.000844679	0.00152711	0.00250901	0	0.00095265
EKVX_LUNG	0.00114576	0.00134971	0.00290701	0.0121415	0.000309689	0.00260752
EOL1_HAEMATOPOIETIC_AND_LYMPHOID_TISSUE	0.00383615	0.0165987	0.0170872	0.00789041	0.00112501	0.00647878
EPLC272H_LUNG	0.00240587	0.00509131	0.00287861	0.00192727	0.00173265	0.00172521
ES2_OVARY	0.00126895	0.00341344	0.0054376	0.00252597	0	0.00298425
ESM1b_score	0.155296	0.364778		0.0248295	0.228883
ESM1v	0.0109645	0.0152656		0.00884284	0.0232473
ESS1_ENDOMETRIUM	0.00126863	0.00208054	0.00136611	0.00130591	0.00120498	0.00306757
EVH_epistatic	0.0143333	0.0697283		0.00440539	0.118864
EVH_independent	0.00585122	0.0189036		0.0385521	0.0236505
EW8_BONE	0.00561677	0.0109664	0.00717031	0.00613222	0.00209248	0.00262787
EWS502_BONE	0.00479106	0.00734581	0.00317115	0.001672	0.000530049	0.00206278
EWSIM	0.0103692	0.0247515		0.0100513	0.0570088
Esophagus_Gastroesophageal_Junction	0.00146744	0.00179694	0.00180176	0.00396789	0.000973719	0.00421442
Esophagus_Mucosa	0.00585853	0.00497929	0.00554068	0.00471298	0.00166671	0.00372318
Esophagus_Muscularis	0.00177239	0.00261767	0.00276173	0.000660299	0.00174833	0.00186443
F5_CENTRAL_NERVOUS_SYSTEM	0.00372611	0.00398785	0.00133203	0.00153657	0.0039777	0.00199894
FADU_UPPER_AERODIGESTIVE_TRACT	0.00515954	0.0114437	0.00675693	0.00750557	0.000723398	0.00275599
FU97_STOMACH	0.00346676	0.00243341	0.00380597	0.00241515	0.00250241	0.00354151
Fallopian_Tube	0.0016863	0.00118658	0.00417212	0.00519711	0.00066942	0.0041501
FoldX_dG	0.0385124	0.0154552	0.0738766	0.0682909	0.0348252	0.117704
G292CLONEA141B1_BONE	0.00790607	0.00814991	0.00599785	0.00692153	0.0128664	0.00552841
G401_SOFT_TISSUE	0.00384332	0.00435952	0.00530768	0.00282013	0.00204655	0.00585076
G402_SOFT_TISSUE	0.00372421	0.00649182	0.00461418	0.00275987	0.000838117	0.00519833
GAMG_CENTRAL_NERVOUS_SYSTEM	0.000687533	0.00135379	0.00235287	0.00262879	0.00191318	0.00120329
GB1_CENTRAL_NERVOUS_SYSTEM	0.00228597	0.00313063	0.00383863	0	0.00223855	0.00108087
GCIY_STOMACH	0.00171949	0.00371132	0.003433	0	0.00349939	0.00438211
GERP_91_mammals	0.0100236	0.021358	0.0456895	0.0166867	0.0149999	0.104178
GERP___NR	0.0129843	0.0305272	0.065428	0.0298294	0.0298478	0.0549175
GERP___RS	0.0153041	0.0200275	0.037771	0.0128615	0.0115862	0.040697
GI1_CENTRAL_NERVOUS_SYSTEM	0.0111265	0.00577085	0.0121471	0.00348412	0.00572787	0.00387472
GSS_STOMACH	0.00727345	0.00455159	0.00484346	0.00418899	0.010501	0.00289239
Grantham	0.00510181	0.00682833	0.0158892	0.0393618	0.0207803	0.0691639
H4_CENTRAL_NERVOUS_SYSTEM	0.00198702	0.0043661	0.00196493	0.0146558	0.00153404	0.00176014
HARA_LUNG	0.000902444	0.00328122	0.00678533	0.000562949	0.000819593	0.00632266
HBonds	0.00440172	0.0065882	0.0385398	0.000170529	0.00193602	0.00333121
HCC1143_BREAST	0.00184793	0.014489	0.00333047	0.00192566	0.00129394	0.00193629
HCC1359_LUNG	0.00313877	0.0190217	0.0041628	0	0.00465308	0.00175957
HCC1395_BREAST	0.00291279	0.00534992	0.00296797	0.000645253	0.000982369	0.00180442
HCC1419_BREAST	0.000830838	0.00266215	0.000939979	0.00611552	0.0013606	0.00112951
HCC1428_BREAST	0.00152595	0.00165615	0.0021245	0.00338057	0.00258118	0.00251832
HCC15_LUNG	0.00186069	0.00295092	0.00444705	0.00274518	0.00537009	0.00304448
HCC1806_BREAST	0.0043441	0.00323171	0.00210619	0.00702032	0.00231979	0.000825403
HCC1937_BREAST	0.00225751	0.00125949	0.00321808	0.00525495	0.00147991	0.00918317
HCC1954_BREAST	0.00912446	0.0209256	0.0428025	0.00287413	0.00200269	0.00202073
HCC202_BREAST	0.00566809	0.00488386	0.0144206	0.00320725	0.00511298	0.00587592
HCC44_LUNG	0.00237058	0.00663109	0.00615851	0.0167956	0.00294697	0.00396482
HCC56_LARGE_INTESTINE	0.00102724	0.00268469	0.00174248	0.000250577	0.00234167	0.00247385
HCC827_LUNG	0.00103276	0.000843448	0.00178215	0	0.000880195	0.00289651
HCC95_LUNG	0.00179687	0.00257244	0.00241735	0.0238933	0.00308617	0.00526321
HEC1A_ENDOMETRIUM	0.0023435	0.00822385	0.00618084	0.0169315	0.00162133	0.00251029
HEC1B_ENDOMETRIUM	0.00235931	0.00275502	0.00286039	0	0.00145813	0.00258859
HEC251_ENDOMETRIUM	0.00242103	0.00541017	0.00523333	0.00204179	0.00355113	0.00417251
HEC50B_ENDOMETRIUM	0.00183664	0.00223977	0.00297498	0.00370226	0.00175079	0.00312107
HEC59_ENDOMETRIUM	0.00676282	0.00320361	0.00581974	0.0031725	0.00212262	0.0030955
HEC6_ENDOMETRIUM	0.00180272	0.00603542	0.00243467	0.00270695	0.00253374	0.00160796
HEL_HAEMATOPOIETIC_AND_LYMPHOID_TISSUE	0.00173171	0.00416496	0.00527854	0.00564082	0.00120242	0.00681343
HEYA8_OVARY	0.00150271	0.00391505	0.00486808	0.00192658	0.000988483	0.00313289
HGC27_STOMACH	0.0105533	0.00263713	0.00369369	0.00036526	0.00342154	0.00161354
HLF_LIVER	0.00165709	0.00194771	0.00319461	0	0.00273368	0.00460568
HMC18_BREAST	0.0012199	0.00198919	0.0017635	0.00385568	0.00319676	0.00190436
HOP62_LUNG	0.00172252	0.0028016	0.00260609	0.00468734	0.00216052	0.00360151
HS294T_SKIN	0.00205069	0.00479336	0.00950798	0.000516928	0.00440478	0.00359631
HS294T_SKIN_2	0.00424884	0.00258945	0.00578608	0	0.000703938	0.00385244
HS578T_BREAST	0.000993111	0.00106941	0.005743	0.0147866	0.00401024	0.00355727
HS683_CENTRAL_NERVOUS_SYSTEM	0.00156264	0.00186965	0.00205794	0.00452315	0.000832557	0.00252256
HS695T_SKIN	0.00248983	0.00174479	0.00197583	0.00336399	0.00110285	0.00256299
HS729_SOFT_TISSUE	0.00108553	0.00264168	0.00369365	0.0045699	0.0037917	0.00227839
HS766T_PANCREAS	0.00209166	0.00383728	0.00227666	0	0.00517792	0.00365191
HS944T_SKIN	0.00358157	0.00382898	0.0024512	0.0027615	0.00190028	0.00227812
HSC3_UPPER_AERODIGESTIVE_TRACT	0.00159508	0.00400491	0.00467504	0.00148033	0.00122002	0.0023874
HT1080_SOFT_TISSUE	0.000953366	0.00460385	0.00216694	0	0.00239822	0.00293988
HT115_LARGE_INTESTINE	0.00369816	0.00238756	0.00613604	0.00510236	0.00284755	0.00583001
HT1197_URINARY_TRACT	0.0020596	0.00551289	0.00549817	0.00886523	0.00622573	0.00324138
HT1376_URINARY_TRACT	0.00458729	0.00361803	0.00443734	0.000970955	0.00179288	0.00328314
HT144_SKIN	0.00327563	0.00538867	0.00382033	0.0151957	0.00176472	0.00243774
HT29_LARGE_INTESTINE	0.00382405	0.00396735	0.00269244	0.00376271	0.00357768	0.00279998
HT55_LARGE_INTESTINE	0.00131463	0.00379929	0.00478618	0.00274971	0.00091748	0.0017713
HUH1_LIVER	0.00154262	0.00673554	0.0154338	0.0026886	0.00175743	0.00294188
HUH6_LIVER	0.00175562	0.00143831	0.00309481	0	0.0047877	0.00687624
HUH7_LIVER	0.00172244	0.0188928	0.0120575	0.010606	0.00765304	0.00181971
HUPT3_PANCREAS	0.00135391	0.00232722	0.00345181	0	0.00257682	0.0105591
Heart_Atrial_Appendage	0.00202451	0.00470424	0.00501499	0.00374455	0.00519208	0.00739115
Heart_Left_Ventricle	0.00123518	0.00334345	0.0105749	0.00590928	0.00358436	0.00481602
IGR1_SKIN	0.00283342	0.00800037	0.00699755	0.0157228	0.00821473	0.00554274
IGR39_SKIN	0.0040625	0.00560022	0.0107146	0.00190175	0.00157806	0.00327505
IMR32_AUTONOMIC_GANGLIA	0.00310894	0.00446	0.00189463	0	0.000742145	0.00725328
IPC298_SKIN	0.00508458	0.00345664	0.00381374	0.00497835	0.00202534	0.00344976
JHH1_LIVER	0.00170861	0.00258309	0.00103529	0.000459957	0.000872449	0.00234528
JHH4_LIVER	0.00146602	0.00159091	0.00648405	0.000759138	0.00131567	0.0016108
JHH5_LIVER	0.00169316	0.00428871	0.0062952	0.000488051	0.000564233	0.00241486
JHH7_LIVER	0.00343343	0.00345261	0.00598343	0.00509216	0.000995252	0.00257846
JHOC5_OVARY	0.00110013	0.0023492	0.00662157	0.00912506	0.00128874	0.00218895
JHOM1_OVARY	0.00276501	0.00443962	0.00724423	0.000398715	0.00327037	0.00714947
JHOS2_OVARY	0.00226949	0.00312297	0.00300223	0.0072423	0.00411027	0.00535275
JHOS4_OVARY	0.00304576	0.00797644	0.027285	0.00158177	0.000926758	0.00388273
JIMT1_BREAST	0.00505212	0.00342917	0.00451714	0.000328324	0.000952242	0.00267982
JMSU1_URINARY_TRACT	0.00353031	0.00760054	0.0133949	0.000401331	0.00121674	0.000286602
K029AX_SKIN	0.00361161	0.00559526	0.00607339	0.00701831	0.0113199	0.00536028
K562_HAEMATOPOIETIC_AND_LYMPHOID_TISSUE	0.005106	0.00688311	0.00494738	0.00456956	0.00234177	0.00358756
KALS1_CENTRAL_NERVOUS_SYSTEM	0.00364979	0.00246531	0.00133099	0	0.00235864	0.00280786
KARPAS299_HAEMATOPOIETIC_AND_LYMPHOID_TISSUE	0.00216419	0.00444221	0.00246725	0.00310885	0.00288701	0.0041504
KELLY_AUTONOMIC_GANGLIA	0.00196386	0.000739049	0.00138712	0	0	0.00153235
KIJK_HAEMATOPOIETIC_AND_LYMPHOID_TISSUE	0.00286535	0.00564299	0.00700531	0.00204014	0.00118323	0.00552242
KLE_ENDOMETRIUM	0.0018331	0.00189154	0.00738591	0.00154808	0.00310527	0.00156737
KM12_LARGE_INTESTINE	0.00116314	0.00568926	0.00653934	0.00131567	0.0023424	0.00834834
KMBC2_URINARY_TRACT	0.00330605	0.00832135	0.0025737	0.004665	0.00129153	0.00133897
KMRC1_KIDNEY	0.00585812	0.00128806	0.00336506	0.00456971	0.010488	0.00192177
KMRC20_KIDNEY	0.0022979	0.00279675	0.00698346	0	0	0.00108987
KNS42_CENTRAL_NERVOUS_SYSTEM	0.000765732	0.0098603	0.0034432	0.00263947	0.00147715	0.00561636
KNS60_CENTRAL_NERVOUS_SYSTEM	0.00182533	0.0109752	0.00626166	0.00387985	0.00257695	0.00582464
KNS62_LUNG	0.003274	0.00323945	0.00390604	0.00191569	0.00245865	0.0026379
KNS81_CENTRAL_NERVOUS_SYSTEM	0.00154609	0.00490573	0.00387254	0.0251997	0.0016249	0.00322687
KP2_PANCREAS	0.00170631	0.00368621	0.00494278	0.00268205	0.00182605	0.00184697
KP3_PANCREAS	0.00109378	0.00154417	0.00464807	0	0.00178005	0.00109089
KP4_PANCREAS	0.000793944	0.0011897	0.00306614	0.000878985	0.00147495	0.00381752
KPL1_BREAST	0.0050457	0.00745817	0.00520808	0.0017311	0.00121223	0.00312817
KPNYN_AUTONOMIC_GANGLIA	0.00129462	0.00322601	0.00393465	0.00702043	0.00165275	0.00384403
KS1_CENTRAL_NERVOUS_SYSTEM	0.00231513	0.0044405	0.00879192	0.00532463	0.00313217	0.00559709
KU1919_URINARY_TRACT	0.0027061	0.00600909	0.00162255	0.00218242	0.000659637	0.00488665
KURAMOCHI_OVARY	0.00432226	0.00802733	0.00433811	0.00296251	0.001255	0.00153773
KYSE180_OESOPHAGUS	0.00147218	0.00236513	0.00146221	0.00115572	0.000471313	0.0012446
KYSE270_OESOPHAGUS	0.00317463	0.00321107	0.00618851	0.00358426	0.00148541	0.00636266
KYSE30_OESOPHAGUS	0.00149997	0.0033867	0.00250362	0.00235692	0.00471455	0.00288768
KYSE410_OESOPHAGUS	0.00142714	0.00110445	0.00177967	0.0030864	0.00141188	0.00170925
KYSE450_OESOPHAGUS	0.00302619	0.00110223	0.00412311	0	0.00124055	0.00170878
KYSE70_OESOPHAGUS	0.00424656	0.00698879	0.00351169	0.000654293	0.00209791	0.00269214
Kidera_f1	0.0101795	0.0143574	0.0173503	0.019379	0.00641138	0.0183447
Kidera_f10	0.00951185	0.0145667	0.0186207	0.00677958	0.0139304	0.0220769
Kidera_f2	0.00925296	0.016599	0.0410163	0.0052728	0.0232409	0.0373138
Kidera_f3	0.00706242	0.0236704	0.0443834	0.0419231	0.0389834	0.0360918
Kidera_f4	0.0103279	0.0260471	0.0479567	0.0457864	0.0290963	0.0534769
Kidera_f5	0.0094423	0.0477011	0.0621936	0.00727111	0.0651971	0.0567223
Kidera_f6	0.0431755	0.0260392	0.0500773	0.0624474	0.0194166	0.0243358
Kidera_f7	0.00792114	0.0120514	0.0148585	0.0300072	0.00341246	0.0162021
Kidera_f8	0.00804278	0.0129905	0.0316525	0.0142279	0.0113752	0.0488265
Kidera_f9	0.0125352	0.0244258	0.025236	0.0469046	0.00596157	0.0276136
Kidney_Cortex	0.00367358	0.00913285	0.00777615	0.0177824	0.00393023	0.00690439
Kidney_Medulla	0.00228206	0.00555067	0.00836072	0.00254246	0.00519511	0.00666097
L33_PANCREAS	0.00686793	0.00823804	0.0118466	0.0122478	0.00284299	0.00509293
LCLC103H_LUNG	0.00304585	0.00157034	0.00196712	0.00521574	0.00377572	0.0054896
LI7_LIVER	0.00210357	0.00197719	0.00181248	0	0.00163068	0.015854
LIST_S2_score	0.00575326	0.0623276		0.0257504	0.0270082
LK2_LUNG	0.00108407	0.00142825	0.00612984	0.00929577	0.00119834	0.00278393
LN18_CENTRAL_NERVOUS_SYSTEM	0.00139807	0.00255153	0.000906676	0.00361346	0.00105642	0.00113735
LN235_CENTRAL_NERVOUS_SYSTEM	0.00334279	0.00600858	0.00672306	0.00177829	0.00869765	0.0129359
LN382_CENTRAL_NERVOUS_SYSTEM	0.00209698	0.00190608	0.00417096	0.011819	0.0034146	0.00178414
LN443_CENTRAL_NERVOUS_SYSTEM	0.00215709	0.00724692	0.00547379	0.0108108	0.00169884	0.00379975
LNCAPCLONEFGC_PROSTATE	0.00200761	0.00156459	0.00516661	0.0027113	0.00109383	0.00237847
LNZ308_CENTRAL_NERVOUS_SYSTEM	0.00580198	0.00622565	0.00550596	0.000808082	0.000729961	0.00204031
LOVO_LARGE_INTESTINE	0.00452555	0.00731315	0.010981	0.00120878	0.00233744	0.00335288
LS1034_LARGE_INTESTINE	0.00173455	0.00284101	0.00332447	0.00248856	0.0023655	0.00320473
LS180_LARGE_INTESTINE	0.0013761	0.00247755	0.00538648	0.00205016	0.00193359	0.00205038
LS513_LARGE_INTESTINE	0.00448344	0.00199849	0.00289049	0.00631807	0.00235776	0.00433414
LUDLU1_LUNG	0.00176745	0.00110785	0.0020284	0.00179886	0.00123697	0.00229019
LXF289_LUNG	0.00142167	0.00206683	0.00167106	0.0054327	0.00255951	0.00436294
Liver	0.0082841	0.0120984	0.0207525	0.000832479	0.00744703	0.00923112
Liver_Hepatocyte	0.00988089	0.00979782	0.0106304	0.00640165	0.00542674	0.00588974
Liver_Mixed_Cell	0.00372625	0.0079275	0.00577662	0.00532218	0.00502095	0.00646774
Liver_Portal_Tract	0.0027173	0.00977234	0.0161331	0.058772	0.00441971	0.00972312
Lung	0.000772085	0.0092779	0.00601199	0.00111193	0.00146673	0.0025487
M059K_CENTRAL_NERVOUS_SYSTEM	0.00140567	0.00136622	0.00179514	0.00220798	0.000619134	0.00383253
MALME3M_SKIN	0.0115935	0.00583266	0.00515422	0.012452	0.00394211	0.0047508
MCAS_OVARY	0.00567451	0.00290927	0.00198736	0.00364086	0.00147799	0.00362817
MDAMB157_BREAST	0.000572474	0.00229702	0.00668388	0.00361842	0.0016837	0.00150199
MDAMB231_BREAST	0.00191303	0.00446873	0.00565203	0.00215134	0.000398047	0.00363857
MDAMB415_BREAST	0.00169178	0.00194445	0.00659032	0.00144521	0.00150856	0.00452053
MDAMB435S_SKIN	0.00212579	0.00187274	0.00271998	0.00156595	0.00377701	0.00245346
MDAMB436_BREAST	0.00534892	0.00981351	0.007835	0.0056499	0.00392942	0.0120658
MDAMB453_BREAST	0.000798081	0.00382516	0.00617564	0.00386083	0.0012625	0.00331498
MDAMB468_BREAST	0.00405073	0.0128626	0.00709311	0.0189653	0.00392777	0.00798789
MDST8_LARGE_INTESTINE	0.00157979	0.00251676	0.0032108	0.00407136	0.00272054	0.00255969
MELHO_SKIN	0.00156704	0.00253437	0.00339147	0.0306204	0.00508807	0.00436606
MELJUSO_SKIN	0.00171089	0.00218334	0.00261291	0	0.0040145	0.00135583
MEWO_SKIN	0.00131312	0.00394997	0.00539165	0.00148924	0.0040098	0.00611976
MFE319_ENDOMETRIUM	0.00247413	0.00465562	0.00548194	0.00105272	0.00180845	0.00215343
MHHES1_BONE	0.00534165	0.00372453	0.00369628	0.00103754	0.00238859	0.0044281
MHHNB11_AUTONOMIC_GANGLIA	0.00127383	0.00239325	0.00152655	0.000399951	0.0018799	0.0028445
MIAPACA2_PANCREAS	0.000779536	0.00145104	0.00133951	0.0080587	0.00251396	0.00203675
MIQS	0.00328946	0.0172684	0.0224217	0.00783184	0.042366	0.0426156
MKN45_STOMACH	0.00137676	0.00180187	0.00235859	0.00857494	0.00144529	0.00114446
MOLM13_HAEMATOPOIETIC_AND_LYMPHOID_TISSUE	0.00528237	0.00288347	0.00770346	0	0.00330248	0.00503757
MOLM13_HAEMATOPOIETIC_AND_LYMPHOID_TISSUE_2	0.00101931	0.0013079	0.00521204	0.00364369	0.00132664	0.0018302
MONOMAC1_HAEMATOPOIETIC_AND_LYMPHOID_TISSUE	0.00236221	0.00214598	0.00293523	0.0085956	0.00823798	0.00451947
MORCPR_LUNG	0.00045794	0.00135621	0.00320243	0.00215173	0.0014129	0.00419596
MPC_score	0.0193336			0.0805452
MTR	0.0156291	0.0401383	0.125297	0.042136	0.0761157	0.190171
MV411_HAEMATOPOIETIC_AND_LYMPHOID_TISSUE	0.00173931	0.0044083	0.00443456	0.000757726	0.00339879	0.00379113
MV411_HAEMATOPOIETIC_AND_LYMPHOID_TISSUE_2	0.00202044	0.00425477	0.00674117	0.00573374	0.00302121	0.00353372
M_CAP_score	0.0150548			0.0215718
MetaLR_score	0.347477			0.361061
MetaRNN_score	0.0990802			0.600586
MetaSVM_score	1.19991			0.773671
Minor_Salivary_Gland	0.00247814	0.00275962	0.00630338	0.00368159	0.00224753	0.0019135
Muscle_Skeletal	0.00274842	0.00389527	0.0104853	0.007691	0.018751	0.0122531
MutFormer_score	0.0794481			0.0288441
MutPred_score	0.0536255			0.0943234
MutScore_score	0.183046			0.136919
MutationAssessor_score	0.0223237	0.0987854		0.067986	0.196158
NB1_AUTONOMIC_GANGLIA	0.00245623	0.00249246	0.00170305	0.00203411	0.00151304	0.00264995
NB4_HAEMATOPOIETIC_AND_LYMPHOID_TISSUE	0.00241144	0.0042703	0.00504357	0.0109073	0.0105462	0.00324179
NB4_HAEMATOPOIETIC_AND_LYMPHOID_TISSUE_2	0.0189527	0.00590605	0.0167625	0.0124828	0.008408	0.00505318
NCIH1299_LUNG	0.00352429	0.00319346	0.00508396	0.00584592	0.00313617	0.00266835
NCIH1373_LUNG	0.00462793	0.00466188	0.0107368	0.00296261	0.00262763	0.00853633
NCIH1437_LUNG	0.00170271	0.00315871	0.00338447	0.00443189	0.0015902	0.00198248
NCIH1581_LUNG	0.0010354	0.00309385	0.00291737	0	0.000974582	0.00186443
NCIH1650_LUNG	0.00149578	0.00496597	0.00516844	0.0340809	0.00419494	0.00230322
NCIH1693_LUNG	0.0027653	0.00320734	0.00340777	0	0.0014017	0.00521302
NCIH1703_LUNG	0.0119938	0.00983668	0.0197449	0	0.00115539	0.00311866
NCIH1792_LUNG	0.00151177	0.00416904	0.00305002	0.00482597	0.00140403	0.00236998
NCIH1944_LUNG	0.00108548	0.00227223	0.00200624	0.0161	0.000700218	0.000368725
NCIH2009_LUNG	0.0179162	0.00875937	0.014211	0.00161741	0.00197652	0.00467051
NCIH2023_LUNG	0.00138775	0.00182768	0.00192285	0.00182463	0.000603593	0.00155765
NCIH2030_LUNG	0.000608983	0.00127775	0.00235743	0	0.0071858	0.00783379
NCIH2087_LUNG	0.00278849	0.00282901	0.00590439	0.00768943	0.00115924	0.00109553
NCIH2110_LUNG	0.000610451	0.00256703	0.001899	0.008051	0.00471549	0.00240949
NCIH2122_LUNG	0.00156618	0.00269431	0.00142286	0.00813048	0.00213325	0.00227381
NCIH2126_LUNG	0.00286927	0.00144642	0.0026554	0.001988	0.00216775	0.00329494
NCIH2170_LUNG	0.000834164	0.0015379	0.00169689	0.00018184	0.00118184	0.00204074
NCIH2172_LUNG	0.00192354	0.001972	0.00604799	0.000443468	0.00224735	0.00249602
NCIH2291_LUNG	0.00200611	0.00171294	0.0100166	0.000326673	0.00053803	0.00260167
NCIH23_LUNG	0.00181658	0.00401644	0.00601414	0.00264211	0.00155508	0.00238974
NCIH322_LUNG	0.00133775	0.0017008	0.00341918	0.000613905	0.00197042	0.00555401
NCIH441_LUNG	0.00118242	0.0021374	0.0048228	0	0.000653341	0.00185104
NCIH460_LUNG	0.00265759	0.000191568	0.00417445	0	0	0.00149376
NCIH520_LUNG	0.00170211	0.00293109	0.00375697	0.00275186	0.00350982	0.0104369
NCIH716_LARGE_INTESTINE	0.00137024	0.00445348	0.00528108	0.00156975	0.00234857	0.00352399
NCIH747_LARGE_INTESTINE	0.00127269	0.00562626	0.00628741	0.00430957	0.00289674	0.00175525
NCIH838_LUNG	0.00327557	0.00151768	0.00273904	0.0148395	0.00214269	0.00167832
NCIN87_STOMACH	0.00295901	0.0031892	0.00237087	0	0.00147342	0.00202273
NOMO1_HAEMATOPOIETIC_AND_LYMPHOID_TISSUE	0.00215128	0.00220776	0.00383856	0	0.00342366	0.00393407
NUGC3_STOMACH	0.000402257	0.00360763	0.00221522	0.00086189	0.00304553	0.00248886
Nerve_Tibial	0.00639831	0.00311942	0.00488161	0.00100917	0.00083201	0.0022755
OAW28_OVARY	0.000735106	0.00441571	0.0067135	0.00812999	0.00184428	0.00146724
OCIAML2_HAEMATOPOIETIC_AND_LYMPHOID_TISSUE	0.00187759	0.0122889	0.00896745	0	0.00119924	0.00305966
OCIAML3_HAEMATOPOIETIC_AND_LYMPHOID_TISSUE	0.00261794	0.00637099	0.00545465	0.00541317	0.00286368	0.00344825
OCIAML5_HAEMATOPOIETIC_AND_LYMPHOID_TISSUE	0.00265592	0.0048629	0.00342994	0.0169563	0.00312305	0.00390473
OE21_OESOPHAGUS	0.00233764	0.00620952	0.00920477	0.00528817	0.00314479	0.00375288
OE33_OESOPHAGUS	0.00274887	0.00669412	0.00877294	0	0.000303709	0.00343792
ONS76_CENTRAL_NERVOUS_SYSTEM	0.000806948	0.00198795	0.00519961	0.00378595	0.00159708	0.00171896
OSRC2_KIDNEY	0.000900522	0.00162387	0.00196933	0	0.00104464	0.00334212
OUMS23_LARGE_INTESTINE	0.0112575	0.0014821	0.00836416	0.00435907	0.00277824	0.00394579
OV7_OVARY	0.00184094	0.000988179	0.0137242	0.000195178	0.00262669	0.00394467
OV90_OVARY	0.000802686	0.00468677	0.00169151	0.00284528	0.00190982	0.00117018
OVCAR8_OVARY	0.00779764	0.000708366	0.00226463	0.0163847	0.001124	0.0019419
OVISE_OVARY	0.00135246	0.00194944	0.00360662	0	0.00208278	0.0025832
OVK18_OVARY	0.000766203	0.00209317	0.00201435	0.00343622	0.00261091	0.00269736
OVMANA_OVARY	0.00157834	0.00334601	0.00847531	0.0039658	0.00119691	0.00355105
OVTOKO_OVARY	0.00173423	0.00300164	0.00348523	0.000300184	0.00382136	0.00322996
OddsRat	0.00710892	0.00673553	0.112818	0.0167227	0.0303443	0.314567
Ovary	0.00328403	0.00526056	0.00808331	0.00362483	0.00101796	0.00308531
P31FUJ_HAEMATOPOIETIC_AND_LYMPHOID_TISSUE	0.00390695	0.012809	0.013922	0.000235836	0.0020143	0.00499013
P31FUJ_HAEMATOPOIETIC_AND_LYMPHOID_TISSUE_2	0.00181491	0.0033967	0.00511147	0.0121489	0.00100845	0.000258167
PANC0203_PANCREAS	0.0140891	0.0117369	0.0113486	0.00506951	0.00118452	0.00419112
PANC0327_PANCREAS	0.00473433	0.00583354	0.00568654	0.00349755	0.00703078	0.00507548
PANC0403_PANCREAS	0.00568026	0.00579708	0.00796411	0	0.00108114	0.00348069
PANC0813_PANCREAS	0.00456611	0.00373675	0.0184286	0.00541887	0.00168818	0.00305598
PANC1005_PANCREAS	0.00341312	0.0109596	0.0128276	0.00046926	0.0036262	0.00126421
PANC1_PANCREAS	0.00342444	0.00337216	0.00439265	0.0281481	0.00429611	0.00589065
PATU8902_PANCREAS	0.0018101	0.00284129	0.00390055	0.000550514	0.00993416	0.00461503
PATU8988S_PANCREAS	0.00168245	0.0220589	0.0149017	0.00128112	0.00212292	0.0072158
PATU8988T_PANCREAS	0.00115602	0.00200254	0.00520819	0.00478544	0.00751694	0.00251565
PC14_LUNG	0.00178146	0.0070008	0.00749237	0.00153252	0.000599138	0.00215092
PC3_PROSTATE	0.00850365	0.010904	0.0197858	0.00514475	0.00293829	0.00529914
PECAPJ34CLONEC12_UPPER_AERODIGESTIVE_TRACT	0.00135634	0.00344628	0.00726425	0.000689214	0.00317452	0.0027576
PF382_HAEMATOPOIETIC_AND_LYMPHOID_TISSUE	0.00528635	0.00796578	0.00825476	0.00835067	0.0035103	0.00308985
PFASUM60	0.00135307	0.00673698	0.00369588	0.00539922	0.00101348	0.0121529
PHACT	0.163544	0.435353		0.141797	0.861306
PK1_PANCREAS	0.00177714	0.00257164	0.00582316	0.00296841	0.000846987	0.00520039
PK45H_PANCREAS	0.00366839	0.00442727	0.00579657	0.003894	0.00268733	0.00355458
PK59_PANCREAS	0.00575056	0.00376308	0.00375429	0	0.00208306	0.00108225
PL21_HAEMATOPOIETIC_AND_LYMPHOID_TISSUE	0.00258447	0.00331957	0.00302974	0.00557864	0.00161074	0.00339782
PLCPRF5_LIVER	0.000954195	0.00402362	0.00248589	0	0.00617592	0.00203461
PROVEAN_score	0.00873885	0.123889		0.0443677	0.116216
PSN1_PANCREAS	0.00597037	0.00470198	0.00487892	0.0051157	0.00056185	0.00385453
Pancreas	0.00788488	0.00532426	0.00816524	0.00795459	0.00246738	0.00317352
Pancreas_Acini	0.00522238	0.0107706	0.00695185	0.00168538	0.00243951	0.00168379
Pancreas_Islets	0.00525759	0.0243614	0.0197813	0.00291659	0.00409496	0.00906247
Pancreas_Mixed_Cell	0.00557053	0.00237677	0.00846641	0.000697157	0.00206197	0.00254821
Pituitary	0.00530263	0.00303072	0.00724189	0.00678612	0.0016517	0.00495159
Polyphen2_HDIV_score	0.00681757			0.00349802
Polyphen2_HVAR_score	0.0117861			0.00688831
Prostate	0.00920397	0.0106045	0.013499	0	0.00080458	0.00163886
RCC10RGB_KIDNEY	0.0143835	0.016114	0.0150609	0.0029746	0.00360216	0.00411571
RDES_BONE	0.00237281	0.00279843	0.00401047	0.00315015	0.00350118	0.00429519
RD_SOFT_TISSUE	0.00122805	0.00230867	0.00235308	0.0392843	0.00187849	0.00297685
RERFLCAD1_LUNG	0.00220915	0.00157173	0.00269706	0.0037135	0	0.00363773
RERFLCAI_LUNG	0.000234586	0.00150296	0.00191398	0.00118863	0.0015765	0.00206156
REVEL_score	0.0832468			0.0703187
RH30_SOFT_TISSUE	0.0025447	0.00811635	0.00505501	0.00942812	0.00196357	0.00569757
RKN_SOFT_TISSUE	0.00114227	0.00416462	0.00405197	0	0.00101212	0.00666176
RKO_LARGE_INTESTINE	0.000725861	0.00180424	0.00352411	0.00454153	0.00147629	0.0020494
RMUGS_OVARY	0.00167236	0.002042	0.00237734	0	0.00226341	0.00165848
RPMI7951_SKIN	0.00183804	0.00387546	0.00181259	0.00106034	0.000321506	0.000603971
RSA	0.0182012	0.0685705	0.278928	0.0271361	0.0468511	0.221255
RT11284_URINARY_TRACT	0.00310888	0.000929414	0.00245703	0.0074087	0.00278412	0.00361769
RT112_URINARY_TRACT	0.000762679	0.00538305	0.00244976	0.00388236	0.00238936	0.00197392
RT4_URINARY_TRACT	0.00206968	0.00480383	0.00710162	0	0.00362282	0.00526162
RVH421_SKIN	0.00170566	0.00531382	0.0084116	0.0065111	0.00318782	0.00215173
Residual_Variation_Intolerance_Score	0.00687852	0.0129091	0.0216167	0.111815	0.0518497	0.050435
SCABER_URINARY_TRACT	0.00458336	0.00144636	0.00201023	0.000984127	0.00315269	0.00224176
SF295_CENTRAL_NERVOUS_SYSTEM	0.00292606	0.00213212	0.00304187	0	0.00253208	0.00467175
SF767_CENTRAL_NERVOUS_SYSTEM	0.00090048	0.0164798	0.0141326	0.00269703	0.0012366	0.00162788
SH10TC_STOMACH	0.00462205	0.00208764	0.00283995	0	0.00358332	0.00256583
SIFT_score	0.00874518	0.0432797		0.0516611	0.041993
SIMA_AUTONOMIC_GANGLIA	0.00215305	0.0050404	0.00852167	0.00364695	0.002557	0.00320955
SJSA1_BONE	0.00495739	0.00502399	0.00215088	0.00595937	0.00181088	0.00203044
SKBR3_BREAST	0.00137924	0.00824384	0.0137091	0	0.00198687	0.00254087
SKES1_BONE	0.00141268	0.00291401	0.00290211	0.00262758	0.00304304	0.00363334
SKHEP1_LIVER	0.00340745	0.00174983	0.00384485	0.000975785	0.00143902	0.00270025
SKM1_HAEMATOPOIETIC_AND_LYMPHOID_TISSUE	0.00401099	0.00543353	0.0108549	0.00767686	0.00232825	0.00396439
SKMEL24_SKIN	0.00170547	0.0079276	0.00382068	0	0.00517058	0.00926461
SKMEL30_SKIN	0.00266704	0.0106622	0.00430841	0.00121883	0.00238909	0.00450079
SKMES1_LUNG	0.00169778	0.00339383	0.0051523	0	0.00518392	0.00529653
SKNAS_AUTONOMIC_GANGLIA	0.00146825	0.00360239	0.0115232	0.00265841	0.000527806	0.00152617
SKNBE2_AUTONOMIC_GANGLIA	0.00243932	0.00091075	0.000702572	0.00314535	0.00138152	0.00139603
SKNDZ_AUTONOMIC_GANGLIA	0.00103381	0.0024887	0.00347019	0	0.000412752	0.00234072
SKNFI_AUTONOMIC_GANGLIA	0.00270982	0.00216599	0.00305781	0.00159938	0.00254731	0.00337506
SKNMC_BONE	0.00338046	0.00288788	0.00392149	0.0120295	0.00162068	0.00278984
SKOV3_OVARY	0.00373361	0.00291376	0.00419869	0.00815121	0.000391179	0.00236601
SLR20_KIDNEY	0.0186997	0.00813559	0.00199211	0.00395147	0.00455392	0.00294783
SLR23_KIDNEY	0.000737243	0.00104564	0.000996728	0	0.00309145	0.00202142
SLR26_KIDNEY	0.00128364	0.00192982	0.00137975	0.00127301	0.0026802	0.00224228
SNGM_ENDOMETRIUM	0.00103474	0.00287684	0.00143345	0.000694965	0.00102786	0.00320434
SNU1_STOMACH	0.00164045	0.00240941	0.00437752	0.00260811	0.00128991	0.00261317
SNU201_CENTRAL_NERVOUS_SYSTEM	0.00668296	0.00302864	0.00261245	0.000830223	0.00184269	0.00263512
SNU213_PANCREAS	0.00103639	0.00263538	0.00324362	0.0124431	0.0047882	0.00388678
SNU349_KIDNEY	0.000226212	0.00147305	0.00220597	0.000836547	0.00235156	0.00243423
SNU398_LIVER	0.00257033	0.00185722	0.00355228	0.00252456	0.00365244	0.00391173
SNU410_PANCREAS	0.00176302	0.00201643	0.00162348	0.00343461	0.00136327	0.00512475
SNU449_LIVER	0.00116113	0.00259495	0.0011348	0	0.00244832	0.000668035
SNU503_LARGE_INTESTINE	0.0022456	0.00524279	0.0132624	0.00525949	0.00424001	0.00443725
SNU685_ENDOMETRIUM	0.00143624	0.00109618	0.00230185	0	0.000744882	0.00128228
SNU840_OVARY	0.00400276	0.00479165	0.0157312	0	0.00203471	0.00568995
SNU8_OVARY	0.00107016	0.00224599	0.00176861	0.000890307	0.00204945	0.00186336
SS_-	0	0	0	0	0	0
SS_B	0	0	0	0	0	0
SS_E	0.000358733	0.000830662	0	0	0	0.00119687
SS_G	0.000268317	0	0	0	0	0.00239944
SS_H	0.000412168	0	0	0	0	0
SS_I	0	0.000769751	0.00353171	0	0	0.000635492
SS_S	0.000335074	0.000250727	0	0	0	0
SS_T	0.000139179	0.000233652	0	0	0	0.00168623
SU8686_PANCREAS	0.00253779	0.00389384	0.00424375	0.00294691	0.00263744	0.00183714
SUIT2_PANCREAS	0.00402708	0.00818175	0.00977866	0.00106719	0.00344789	0.00170183
SUPM2_HAEMATOPOIETIC_AND_LYMPHOID_TISSUE	0.00187662	0.00402492	0.00437036	0.000197551	0.00330275	0.00290447
SUPT1_HAEMATOPOIETIC_AND_LYMPHOID_TISSUE	0.00306693	0.00632174	0.0102251	0.0156636	0.00866851	0.00191201
SW1463_LARGE_INTESTINE	0.00350314	0.00691269	0.020112	0.00761644	0.00148214	0.00203201
SW403_LARGE_INTESTINE	0.00637653	0.00749627	0.0137046	0.00388557	0.00278877	0.00203938
SW48_LARGE_INTESTINE	0.00149262	0.00230267	0.00542971	0.00329114	0.0036205	0.00295816
SW620_LARGE_INTESTINE	0.000998226	0.00275953	0.00255622	0.00894282	0.00530078	0.00539522
SW837_LARGE_INTESTINE	0.000846458	0.00229818	0.00213514	0	0.000907535	0.0026614
Skin_Not_Sun_Exposed_Suprapubic	0.00272296	0.00366042	0.00866841	0	0.00176002	0.00574362
Skin_Sun_Exposed_Lower_leg	0.00212882	0.00162934	0.00921878	0.0032512	0.00213976	0.00742946
Small_Intestine_Terminal_Ileum	0.0170865	0.0112943	0.0124773	0.00179696	0.00186617	0.00228485
Small_Intestine_Terminal_Ileum_Lymphode_Aggregate	0.00290075	0.0121875	0.00863413	0.00174995	0.00306638	0.00318143
Small_Intestine_Terminal_Ileum_Mixed_Cell	0.00358631	0.00583548	0.00735755	0.00316611	0.0033079	0.0032527
Spleen	0.00632884	0.00524182	0.00601913	0.0085697	0.00355141	0.0040435
Stomach	0.00188793	0.00247317	0.0021681	0	0.000605856	0.00136209
Stomach_Mixed_Cell	0.00265605	0.00359112	0.00377254	0.00534598	0.000302394	0.000986108
Stomach_Mucosa	0.00303915	0.00583702	0.0103877	0.00483213	0.00256971	0.00470164
Stomach_Muscularis	0.00154845	0.00295566	0.00348377	0.0114416	0.00178323	0.00278052
T24_URINARY_TRACT	0.00252809	0.00333941	0.00122891	0.00200534	0.00273516	0.0040172
T3M4_PANCREAS	0.0019014	0.00293731	0.0041758	0	0.00449813	0.00542858
T47D_BREAST	0.00252501	0.00523469	0.00448925	0.00552753	0.00334671	0.00305069
T84_LARGE_INTESTINE	0.00247062	0.00186128	0.00392355	0	0.00241146	0.00397531
T98G_CENTRAL_NERVOUS_SYSTEM	0.00117948	0.00304902	0.00515953	0.00495157	0.00269549	0.00773332
TC32_BONE	0.00135005	0.00445314	0.00458005	0.00601071	0.00377637	0.00308832
TC71_BONE	0.00513999	0.0041999	0.00576555	0.00376175	0.00121248	0.00300602
TCCPAN2_PANCREAS	0.000520073	0.00368877	0.00679144	0.00178876	0.00121536	0.00253965
TCCSUP_URINARY_TRACT	0.00366209	0.00142564	0.00179228	0.0026962	0.000683898	0.00282426
TE1_OESOPHAGUS	0.00432002	0.0026311	0.00436772	0.00937567	0.0006739	0.00321803
TE5_OESOPHAGUS	0.004298	0.00646349	0.0070778	0.000171878	0.000366467	0.00144591
TEN_ENDOMETRIUM	0.00144412	0.0042077	0.00552317	0.00155162	0.00139472	0.00177382
TF1_HAEMATOPOIETIC_AND_LYMPHOID_TISSUE	0.00272807	0.0140214	0.0127951	0.0112857	0.00224127	0.0174844
TF1_HAEMATOPOIETIC_AND_LYMPHOID_TISSUE_2	0.00123699	0.00195645	0.00395659	0.00561024	0.0021793	0.00342891
THP1_HAEMATOPOIETIC_AND_LYMPHOID_TISSUE	0.00261187	0.00611932	0.00702347	0.0198257	0.0138845	0.013344
THP1_HAEMATOPOIETIC_AND_LYMPHOID_TISSUE_2	0.00129852	0.00226719	0.0059453	0.0147982	0.00205621	0.00358903
TOV112D_OVARY	0.00208983	0.00349764	0.00417116	0.0119236	0.00120256	0.00611554
TOV21G_OVARY	0.00551724	0.00338016	0.00443184	0.0158763	0.00143871	0.00269352
TUHR10TKB_KIDNEY	0.00595421	0.00530804	0.00926789	0.000273401	0.00151323	0.00547636
TUHR4TKB_KIDNEY	0.00127904	0.00356897	0.0079887	0.00308326	0.00249362	0.0036155
Testis	0.00595513	0.0180721	0.0289919	0	0.00259434	0.00725872
Thyroid	0.00159056	0.00943796	0.00453754	0.000667221	0.00135259	0.00416675
U118MG_CENTRAL_NERVOUS_SYSTEM	0.000960846	0.00636428	0.011059	0.00224069	0.00180016	0.00265313
U178_CENTRAL_NERVOUS_SYSTEM	0.00753539	0.00711168	0.00599374	0.0117248	0.00861586	0.00385917
U251MG_CENTRAL_NERVOUS_SYSTEM	0.00207762	0.00215467	0.0134963	0	0.00117055	0.00132362
U2OS_BONE	0.00457335	0.00351101	0.00247759	0.00369743	0.00129458	0.00280782
U343_CENTRAL_NERVOUS_SYSTEM	0.00171301	0.00652218	0.002258	0.00325692	0.00279582	0.0018303
U87MG_CENTRAL_NERVOUS_SYSTEM	0.00168951	0.00683186	0.00333585	0.015159	0.00114494	0.00620565
U937_HAEMATOPOIETIC_AND_LYMPHOID_TISSUE	0.00074521	0.00226046	0.00477125	0.0104596	0.00314417	0.00166682
UACC257_SKIN	0.00301388	0.00399922	0.0057414	0	0.00715825	0.0152524
UACC62_SKIN	0.00355523	0.00227708	0.00494037	0.00336522	0.00399535	0.00260425
UKBdepletion_score	0.015814	0.0200205	0.0350363	0.0141325	0.018926	0.0724303
UMUC3_URINARY_TRACT	0.00092885	0.00121572	0.00350029	0.00558283	0.00194617	0.00336306
UOK101_KIDNEY	0.000768145	0.00656473	0.0108384	0.0152339	0.00230023	0.00653153
Uterus	0.000361167	0.00141434	0.00326375	0	0.00042901	0.000941009
VARITY_ER_LOO_score	0.0862555			0.00942439
VARITY_ER_score	0.0979982			0.0299046
VARITY_R_LOO_score	0.0860262			0.0210598
VARITY_R_score	0.065504			0.0103587
VEST4_score	0.496501			0.191205
VMCUB1_URINARY_TRACT	0.00298163	0.00216672	0.00402263	0	0.0013197	0.00197697
VTML	0.00160343	0.00118798	0.00366318	0.00702699	0.00253705	0.00535614
Vagina	0.00165125	0.00227055	0.00594405	0	0.000362185	0.00147342
WM115_SKIN	0.00136244	0.00382481	0.00590094	0.00514119	0.00149121	0.00503036
WM1799_SKIN	0.0065076	0.00982941	0.00249515	0.00642308	0.00228957	0.00305824
WM2664_SKIN	0.00137125	0.00409929	0.00690719	0.00164938	0.00114767	0.0024874
WM793_SKIN	0.00220802	0.00112892	0.00306916	0.00733831	0.0021793	0.00304766
WM983B_SKIN	0.00147008	0.00243341	0.0084642	0.000610598	0.00143587	0.00215784
Whole_Blood	0.00200533	0.00840006	0.0136438	0.00953498	0.0121951	0.00543042
YAPC_PANCREAS	0.00177607	0.00802765	0.00144495	0	0.00312527	0.00329962
YKG1_CENTRAL_NERVOUS_SYSTEM	0.00281117	0.00454751	0.00209025	0.0016524	0.00216221	0.00285014
ZR751_BREAST	0.0017208	0.00157715	0.000657658	0.000523621	0.00249557	0.00246054
a3d_score	0.0106612	0.0241573	0.06199	0.0477412	0.0348784	0.138309
alphafold_score	0.0154394	0.0333968	0.123032	0.0494588	0.0381268	0.189134
bStatistic	0.0127415	0.0176376	0.0335	0.0259868	0.00527821	0.010976
contact_number_10A	0.0129715	0.0706672	0.140089	0.15793	0.0333368	0.15081
contact_number_12A	0.0241859	0.0697314	0.122667	0.0306718	0.0642409	0.151328
contact_number_6A	0.00999683	0.0155369	0.0277017	0.0176596	0.0131826	0.0238237
contact_number_8A	0.00865787	0.0209791	0.0474419	0.0290604	0.027494	0.0652876
esm2_avg_abs_difference	0.0169748	0.0186829	0.0502277	0.0341441	0.0632258	0.13214
esm2_cosine_similarity	0.00853716	0.0122607	0.0287426	0.034515	0.0323685	0.0378818
esm2_mean_log_likelihood_difference	0.0602664	0.0926031	0.406118	0.0357692	0.075032	0.656214
esm2_perplexity_difference	0.0990635	0.233415	0.829969	0.212473	0.241045	0.836641
fathmm_XF_coding_score	0.00817354			0.0491966
glm_AlphCadd	0.0172589			0.00302068
glm_AlphCaddDeogen	0.00684488			0.0201178
glm_AlphDeogen	0.0208325			0.00212166
glm_AlphDeogenRevel	0.0336773			0.0652149
glm_AlphRevel	0.180079			0.0189821
glm_AlphRevelCadd	0.0135972			0.0805131
glm_CaddDeogen	0.00728083			0.0095792
glm_CaddDeogenRevel	0.0972651			0.00717465
glm_DeogenRevel	0.171433			0.10927
glm_RevelCadd	0.02002			0.0207623
gpnmsa_score	0.00562228	0.0261166		0.0281121	0.0154688
jarvis	0.0225597	0.0318389	0.0533808	0.0155684	0.00920952	0.0107145
lof.pLI	0.0101716	0.0372357	0.03135	0.0220826	0.0216257	0.0127373
lof.z_score	0.0443903	0.0191544	0.0253205	0.0851464	0.0139459	0.017161
mis.z_score	0.0125102	0.0102357	0.0199157	0.0669797	0.0901492	0.0790445
mtr3daf2_11a	0.00528115	0.0121443	0.034274	0.00621932	0.025115	0.063787
mtr3daf2_14a	0.0137535	0.0261007	0.093111	0.00841621	0.0318678	0.0583279
mtr3daf2_5a	0.0200533	0.0358269	0.0941445	0.105735	0.216452	0.464308
mtr3daf2_8a	0.00916785	0.0168914	0.0351256	0.0184993	0.0320216	0.0807791
phastCons100way_vertebrate	0.00286004	0.00321371	0.139863	0.0145167	0.00190456	0.162541
phastCons17way_primate	0.0147333	0.0349699	0.0158399	0.0460751	0.0248471	0.0109208
phastCons470way_mammalian	0.00244373	0.00411609	0.0146103	0	0.00107602	0.114421
phi	0.010103	0.00786412	0.0436788	0.0302683	0.0145095	0.0176196
phyloP100way_vertebrate	0.00692393	0.0214023	0.331482	0.0345203	0.0148167	0.488555
phyloP17way_primate	0.00778461	0.0143003	0.0688727	0.0441401	0.0135456	0.0584395
phyloP470way_mammalian	0.00794213	0.0918844	0.224128	0.0184618	0.163769	0.461805
popEVE	0.0749293	0.275818		0.0398374	0.168109
rel_pos_aa	0.0260038	0.0888892	0.174688	0.0571335	0.0116605	0.0333573
s_het	0.0115401	0.0326827	0.0194825	0.156861	0.0126554	0.0225034
sigma_score	0.184261			0.40569
syn.z_score	0.00525549	0.0122224	0.0320371	0.0424442	0.00602622	0.00664249

## Sheet: Supplementary Table 4
#Supplementary Table 4. Benchmarking results of 53 tools evaulated on the functional data
Tool	AUC	Accuracy	OptimalCutoff	Sensitivity	Specificity	YoudensJ	HigherIndicatesPathogenicity
FuncVEP_CTI	0.973417	0.93266	0.617041	0.939459	0.908745	0.848205	TRUE
FuncVEP_CTE	0.957657	0.908249	0.630738	0.909189	0.904943	0.814132	TRUE
FuncVEP_SP	0.949987	0.882155	0.678605	0.873514	0.912548	0.786061	TRUE
ClinVEP_CTI	0.914427	0.849247	0.983785	0.852457	0.83871	0.691167	TRUE
glm_CaddDeogenRevel	0.873859	0.821359	1.54771	0.841155	0.798319	0.639475	TRUE
ClinVEP_SP	0.863022	0.821268	0.586521	0.845948	0.74026	0.586207	TRUE
ClinVEP_CTE	0.8495	0.803561	0.834185	0.809062	0.785505	0.594567	TRUE
VEST4_score	0.84931	0.797135	0.7085	0.802917	0.78945	0.592367	TRUE
PHACT	0.840437	0.78082	0.738395	0.788968	0.754242	0.543209	FALSE
AlphaMissense_score	0.837973	0.784933	0.49495	0.802768	0.728401	0.531168	TRUE
PAI3D_score	0.836882	0.773832	0.724934	0.776976	0.764365	0.541341	TRUE
ESM1b_score	0.833822	0.787005	-8.7915	0.806112	0.729273	0.535385	FALSE
CADD_raw	0.833484	0.80037	4.14704	0.831747	0.685468	0.517215	TRUE
PROVEAN_score	0.826473	0.784674	-2.765	0.803924	0.729295	0.53322	FALSE
MetaRNN_score	0.822817	0.76733	0.787921	0.779507	0.757836	0.537343	TRUE
ESM1v	0.818538	0.75331	-5.1115	0.747504	0.771132	0.518636	FALSE
MutScore_score	0.808787	0.749571	0.7595	0.752009	0.745944	0.497953	TRUE
MutationAssessor_score	0.806295	0.71479	2.5725	0.691148	0.783455	0.474603	TRUE
ClinPred_score	0.80194	0.737108	0.968919	0.739088	0.733237	0.472324	TRUE
sigma_score	0.801771	0.721399	0.77263	0.702486	0.768692	0.471177	TRUE
Polyphen2_HVAR_score	0.79343	0.7436	0.8085	0.772015	0.686032	0.458048	TRUE
VARITY_ER_score	0.791032	0.745445	0.461732	0.806298	0.661861	0.468159	TRUE
VARITY_ER_LOO_score	0.791025	0.745445	0.461732	0.806298	0.661861	0.468159	TRUE
Polyphen2_HDIV_score	0.789073	0.760337	0.9625	0.802847	0.648714	0.451561	TRUE
glm_AlphDeogen	0.786945	0.747257	1.16697	0.80649	0.646578	0.453069	TRUE
glm_RevelCadd	0.786459	0.734874	1.79813	0.710035	0.754338	0.464373	TRUE
VARITY_R_score	0.784904	0.731088	0.660056	0.75334	0.700524	0.453864	TRUE
VARITY_R_LOO_score	0.784689	0.730536	0.660056	0.752863	0.699869	0.452732	TRUE
glm_AlphDeogenRevel	0.782479	0.724333	1.38356	0.753395	0.701568	0.454963	TRUE
glm_CaddDeogen	0.782381	0.720951	1.97172	0.697115	0.761905	0.45902	TRUE
glm_AlphRevel	0.782359	0.731975	1.86606	0.68995	0.764969	0.454919	TRUE
EVH_epistatic	0.778591	0.750149	-5.5165	0.784232	0.637145	0.421378	FALSE
REVEL_score	0.777967	0.749425	0.7285	0.631894	0.839168	0.471062	TRUE
SIFT_score	0.775802	0.716229	0.0035	0.719166	0.70787	0.427036	FALSE
glm_AlphCaddDeogen	0.773551	0.723478	1.72769	0.698571	0.743001	0.441573	TRUE
glm_DeogenRevel	0.771616	0.725723	1.77811	0.723803	0.727223	0.451026	TRUE
glm_AlphCadd	0.766592	0.764952	1.06229	0.80556	0.633045	0.438605	TRUE
glm_AlphRevelCadd	0.760279	0.700439	1.98795	0.667618	0.726204	0.393821	TRUE
popEVE	0.757186	0.761442	-3.3735	0.819923	0.581809	0.401732	FALSE
PrimateAI_score	0.754896	0.761168	0.559462	0.821846	0.575853	0.397698	TRUE
MutPred_score	0.753595	0.698846	0.6645	0.621951	0.761276	0.383227	TRUE
EVH_independent	0.740869	0.727436	-2.956	0.746629	0.663801	0.410429	FALSE
LIST_S2_score	0.740341	0.645946	0.944406	0.6238	0.732877	0.356677	TRUE
DEOGEN2_score	0.730277	0.678676	0.694865	0.667898	0.695106	0.363004	TRUE
EWSIM	0.703597	0.641213	-4.1325	0.622334	0.698962	0.321295	FALSE
gpnmsa_score	0.700623	0.725372	-6.945	0.769922	0.562549	0.332471	FALSE
AlphScore	0.682978	0.778552	0.781334	0.851449	0.541759	0.393208	TRUE
MPC_score	0.665968	0.728763	0.455456	0.801299	0.488315	0.289614	TRUE
M_CAP_score	0.660094	0.61645	0.316098	0.5934	0.634264	0.227663	TRUE
MetaSVM_score	0.648719	0.616788	0.41065	0.671551	0.575978	0.247529	TRUE
MetaLR_score	0.623736	0.611835	0.7848	0.565934	0.646042	0.211976	TRUE
MutFormer_score	0.536214	0.577113	0.999699	0.252944	0.832523	0.0854677	TRUE
fathmm_XF_coding_score	0.497658	0.500659	0.166983	0.261334	0.833108	0.0944426	FALSE

## Sheet: Supplementary Table 5
#Supplementary Table 5. Benchmarking results of 53 tools evaulated on the clinical data
Tool	AUC	Accuracy	OptimalCutoff	Sensitivity	Specificity	YoudensJ	HigherIndicatesPathogenicity
ClinVEP_CTI	0.999479	0.989761	0.593689	0.984925	0.994783	0.979707	TRUE
FuncVEP_CTI	0.992996	0.966443	0.521399	0.964171	0.9682	0.932371	TRUE
ClinPred_score	0.991695	0.960445	0.587586	0.963335	0.957687	0.921022	TRUE
ClinVEP_CTE	0.98634	0.947952	0.496301	0.944724	0.951304	0.896028	TRUE
MetaRNN_score	0.983263	0.951512	0.728349	0.933998	0.9625	0.896498	TRUE
FuncVEP_CTE	0.971989	0.921066	0.602393	0.932017	0.912595	0.844612	TRUE
ClinVEP_SP	0.968346	0.912969	0.669392	0.887772	0.93913	0.826903	TRUE
AlphaMissense_score	0.962599	0.899572	0.35785	0.897679	0.901401	0.799079	TRUE
glm_AlphRevelCadd	0.956599	0.901068	0.609579	0.921697	0.890223	0.81192	TRUE
glm_RevelCadd	0.955956	0.893199	0.824737	0.910377	0.88443	0.794808	TRUE
glm_CaddDeogenRevel	0.953349	0.893513	0.966556	0.904306	0.889803	0.794109	TRUE
glm_AlphRevel	0.953203	0.905269	0.956548	0.88961	0.913527	0.803138	TRUE
glm_AlphCaddDeogen	0.951602	0.89209	1.0042	0.888342	0.894057	0.782398	TRUE
MutScore_score	0.951352	0.888844	0.5745	0.904333	0.875236	0.779568	TRUE
glm_AlphDeogenRevel	0.950315	0.894618	0.694947	0.912685	0.885147	0.797832	TRUE
FuncVEP_SP	0.947642	0.880998	0.583537	0.907901	0.860188	0.768089	TRUE
VEST4_score	0.946515	0.854874	0.5985	0.92093	0.839412	0.760342	TRUE
PAI3D_score	0.946013	0.874595	0.707527	0.846136	0.902045	0.748181	TRUE
VARITY_R_score	0.943789	0.876627	0.435065	0.899504	0.85744	0.756944	TRUE
VARITY_R_LOO_score	0.943669	0.876344	0.435065	0.899504	0.85692	0.756424	TRUE
VARITY_ER_score	0.942297	0.876344	0.433085	0.864144	0.886576	0.75072	TRUE
VARITY_ER_LOO_score	0.942277	0.876344	0.433085	0.864144	0.886576	0.75072	TRUE
glm_DeogenRevel	0.941288	0.891153	1.25065	0.867624	0.903069	0.770693	TRUE
glm_AlphCadd	0.938476	0.881742	0.677675	0.893647	0.859024	0.752671	TRUE
PHACT	0.936744	0.869058	0.746489	0.881652	0.856774	0.738425	FALSE
glm_CaddDeogen	0.927925	0.854176	0.528736	0.910014	0.812088	0.722102	TRUE
MutPred_score	0.923141	0.852493	0.5905	0.837838	0.861803	0.69964	TRUE
EVH_epistatic	0.921897	0.855611	-5.3725	0.872076	0.83908	0.711156	FALSE
ESM1b_score	0.921839	0.856358	-8.3565	0.853672	0.85904	0.712712	FALSE
SIFT_score	0.913609	0.845774	0.0075	0.833636	0.85789	0.691526	FALSE
Polyphen2_HVAR_score	0.910364	0.839933	0.6755	0.875127	0.808496	0.683623	TRUE
MutationAssessor_score	0.906712	0.834088	2.2125	0.84603	0.822574	0.668605	TRUE
CADD_raw	0.906537	0.834005	3.91862	0.873848	0.793839	0.667687	TRUE
REVEL_score	0.906394	0.844846	0.5705	0.768377	0.892334	0.660711	TRUE
glm_AlphDeogen	0.905403	0.837371	0.706673	0.861915	0.809137	0.671053	TRUE
popEVE	0.904252	0.831381	-3.4105	0.84535	0.817418	0.662768	FALSE
Polyphen2_HDIV_score	0.902385	0.835661	0.9785	0.838057	0.833397	0.671454	TRUE
PROVEAN_score	0.901235	0.833618	-2.505	0.85177	0.815499	0.667269	FALSE
ESM1v	0.895163	0.836352	-4.1855	0.794846	0.877837	0.672683	FALSE
sigma_score	0.888215	0.807454	0.50524	0.809396	0.805732	0.615128	TRUE
EVH_independent	0.887524	0.826434	-2.9575	0.842708	0.810095	0.652803	FALSE
gpnmsa_score	0.860787	0.785629	-6.645	0.828128	0.74313	0.571258	FALSE
M_CAP_score	0.85112	0.762037	0.186308	0.849475	0.704528	0.554003	TRUE
LIST_S2_score	0.844993	0.767678	0.89926	0.791243	0.744222	0.535465	TRUE
DEOGEN2_score	0.835905	0.77183	0.579785	0.710612	0.819149	0.529761	TRUE
PrimateAI_score	0.830177	0.75237	0.588196	0.802143	0.704247	0.50639	TRUE
MetaSVM_score	0.827808	0.799786	0.16425	0.712974	0.819638	0.532611	TRUE
EWSIM	0.80986	0.73845	-3.5185	0.751733	0.725173	0.476906	FALSE
MetaLR_score	0.808983	0.745513	0.56465	0.710677	0.753479	0.464156	TRUE
AlphScore	0.808316	0.751438	0.80553	0.696193	0.805007	0.5012	TRUE
MPC_score	0.773956	0.706642	0.524612	0.766812	0.648413	0.415225	TRUE
MutFormer_score	0.736059	0.65071	0.922413	0.764271	0.613095	0.377366	TRUE
fathmm_XF_coding_score	0.720806	0.748317	0.698196	0.675297	0.766721	0.442018	TRUE

## Sheet: Supplementary Table 6
#Supplementary Table 6. MAVE dataset.
chr	pos	ref	alt	ensg	score	source	gene
1	11022403	A	C	ENSG00000120948	-0.3427	urn:mavedb:00000060-a-2	TARDBP
1	11022403	A	G	ENSG00000120948	-0.0669	urn:mavedb:00000060-a-2	TARDBP
1	11022403	A	T	ENSG00000120948	0.4813	urn:mavedb:00000060-a-2	TARDBP
1	11022404	G	A	ENSG00000120948	-0.1936	urn:mavedb:00000060-a-2	TARDBP
1	11022404	G	C	ENSG00000120948	0.4742	urn:mavedb:00000060-a-2	TARDBP
1	11022404	G	T	ENSG00000120948	0.5457	urn:mavedb:00000060-a-2	TARDBP
1	11022405	C	A	ENSG00000120948	-0.3427	urn:mavedb:00000060-a-2	TARDBP
1	11022405	C	G	ENSG00000120948	-0.3427	urn:mavedb:00000060-a-2	TARDBP
1	11022406	A	C	ENSG00000120948	-0.4941	urn:mavedb:00000060-a-2	TARDBP
1	11022406	A	G	ENSG00000120948	-0.1099	urn:mavedb:00000060-a-2	TARDBP
1	11022406	A	T	ENSG00000120948	0.5581	urn:mavedb:00000060-a-2	TARDBP
1	11022407	G	A	ENSG00000120948	-0.3255	urn:mavedb:00000060-a-2	TARDBP
1	11022407	G	C	ENSG00000120948	0.3053	urn:mavedb:00000060-a-2	TARDBP
1	11022407	G	T	ENSG00000120948	0.7424	urn:mavedb:00000060-a-2	TARDBP
1	11022408	T	A	ENSG00000120948	-0.4941	urn:mavedb:00000060-a-2	TARDBP
1	11022408	T	G	ENSG00000120948	-0.4941	urn:mavedb:00000060-a-2	TARDBP
1	11022409	T	A	ENSG00000120948	-0.5933	urn:mavedb:00000060-a-2	TARDBP
1	11022409	T	C	ENSG00000120948	-0.5933	urn:mavedb:00000060-a-2	TARDBP
1	11022409	T	G	ENSG00000120948	-0.5847	urn:mavedb:00000060-a-2	TARDBP
1	11022410	G	A	ENSG00000120948	0.7426	urn:mavedb:00000060-a-2	TARDBP
1	11022410	G	C	ENSG00000120948	-0.5435	urn:mavedb:00000060-a-2	TARDBP
1	11022410	G	T	ENSG00000120948	0.0765	urn:mavedb:00000060-a-2	TARDBP
1	11022411	G	A	ENSG00000120948	0.7426	urn:mavedb:00000060-a-2	TARDBP
1	11022411	G	C	ENSG00000120948	-0.4561	urn:mavedb:00000060-a-2	TARDBP
1	11022411	G	T	ENSG00000120948	-0.4561	urn:mavedb:00000060-a-2	TARDBP
1	11022412	G	A	ENSG00000120948	0.2629	urn:mavedb:00000060-a-2	TARDBP
1	11022412	G	C	ENSG00000120948	0.0946	urn:mavedb:00000060-a-2	TARDBP
1	11022412	G	T	ENSG00000120948	0.6513	urn:mavedb:00000060-a-2	TARDBP
1	11022413	G	A	ENSG00000120948	-0.2351	urn:mavedb:00000060-a-2	TARDBP
1	11022413	G	C	ENSG00000120948	0.6453	urn:mavedb:00000060-a-2	TARDBP
1	11022413	G	T	ENSG00000120948	0.6752	urn:mavedb:00000060-a-2	TARDBP
1	11022415	A	C	ENSG00000120948	0.2252	urn:mavedb:00000060-a-2	TARDBP
1	11022415	A	G	ENSG00000120948	-0.0193	urn:mavedb:00000060-a-2	TARDBP
1	11022415	A	T	ENSG00000120948	0.2252	urn:mavedb:00000060-a-2	TARDBP
1	11022416	T	A	ENSG00000120948	-0.6077	urn:mavedb:00000060-a-2	TARDBP
1	11022416	T	C	ENSG00000120948	-0.5698	urn:mavedb:00000060-a-2	TARDBP
1	11022416	T	G	ENSG00000120948	-0.5297	urn:mavedb:00000060-a-2	TARDBP
1	11022417	G	A	ENSG00000120948	0.318	urn:mavedb:00000060-a-2	TARDBP
1	11022417	G	C	ENSG00000120948	0.318	urn:mavedb:00000060-a-2	TARDBP
1	11022417	G	T	ENSG00000120948	0.318	urn:mavedb:00000060-a-2	TARDBP
1	11022418	A	C	ENSG00000120948	0.2898	urn:mavedb:00000060-a-2	TARDBP
1	11022418	A	G	ENSG00000120948	-0.0065	urn:mavedb:00000060-a-2	TARDBP
1	11022418	A	T	ENSG00000120948	0.2898	urn:mavedb:00000060-a-2	TARDBP
1	11022419	T	A	ENSG00000120948	-0.521	urn:mavedb:00000060-a-2	TARDBP
1	11022419	T	C	ENSG00000120948	-0.5324	urn:mavedb:00000060-a-2	TARDBP
1	11022419	T	G	ENSG00000120948	-0.495	urn:mavedb:00000060-a-2	TARDBP
1	11022420	G	A	ENSG00000120948	0.2719	urn:mavedb:00000060-a-2	TARDBP
1	11022420	G	C	ENSG00000120948	0.2719	urn:mavedb:00000060-a-2	TARDBP
1	11022420	G	T	ENSG00000120948	0.2719	urn:mavedb:00000060-a-2	TARDBP
1	11022421	G	A	ENSG00000120948	0.2103	urn:mavedb:00000060-a-2	TARDBP
1	11022421	G	C	ENSG00000120948	0.1195	urn:mavedb:00000060-a-2	TARDBP
1	11022421	G	T	ENSG00000120948	0.7861	urn:mavedb:00000060-a-2	TARDBP
1	11022422	G	A	ENSG00000120948	-0.3536	urn:mavedb:00000060-a-2	TARDBP
1	11022422	G	C	ENSG00000120948	0.5588	urn:mavedb:00000060-a-2	TARDBP
1	11022422	G	T	ENSG00000120948	0.7375	urn:mavedb:00000060-a-2	TARDBP
1	11022424	A	C	ENSG00000120948	0.1738	urn:mavedb:00000060-a-2	TARDBP
1	11022424	A	G	ENSG00000120948	-0.1001	urn:mavedb:00000060-a-2	TARDBP
1	11022424	A	T	ENSG00000120948	0.1738	urn:mavedb:00000060-a-2	TARDBP
1	11022425	T	A	ENSG00000120948	-0.5607	urn:mavedb:00000060-a-2	TARDBP
1	11022425	T	C	ENSG00000120948	-0.4872	urn:mavedb:00000060-a-2	TARDBP
1	11022425	T	G	ENSG00000120948	-0.4806	urn:mavedb:00000060-a-2	TARDBP
1	11022426	G	A	ENSG00000120948	0.2157	urn:mavedb:00000060-a-2	TARDBP
1	11022426	G	C	ENSG00000120948	0.2157	urn:mavedb:00000060-a-2	TARDBP
1	11022426	G	T	ENSG00000120948	0.2157	urn:mavedb:00000060-a-2	TARDBP
1	11022427	T	A	ENSG00000120948	0.0399	urn:mavedb:00000060-a-2	TARDBP
1	11022427	T	G	ENSG00000120948	-0.1509	urn:mavedb:00000060-a-2	TARDBP
1	11022428	T	A	ENSG00000120948	0.8821	urn:mavedb:00000060-a-2	TARDBP
1	11022428	T	C	ENSG00000120948	-0.5023	urn:mavedb:00000060-a-2	TARDBP
1	11022428	T	G	ENSG00000120948	0.8821	urn:mavedb:00000060-a-2	TARDBP
1	11022429	A	C	ENSG00000120948	0.4545	urn:mavedb:00000060-a-2	TARDBP
1	11022429	A	T	ENSG00000120948	0.4545	urn:mavedb:00000060-a-2	TARDBP
1	11022430	G	A	ENSG00000120948	-0.081	urn:mavedb:00000060-a-2	TARDBP
1	11022430	G	C	ENSG00000120948	-0.3177	urn:mavedb:00000060-a-2	TARDBP
1	11022430	G	T	ENSG00000120948	-0.188	urn:mavedb:00000060-a-2	TARDBP
1	11022431	C	A	ENSG00000120948	-0.472	urn:mavedb:00000060-a-2	TARDBP
1	11022431	C	G	ENSG00000120948	-0.2103	urn:mavedb:00000060-a-2	TARDBP
1	11022431	C	T	ENSG00000120948	0.515	urn:mavedb:00000060-a-2	TARDBP
1	11022433	A	C	ENSG00000120948	-0.1079	urn:mavedb:00000060-a-2	TARDBP
1	11022433	A	G	ENSG00000120948	-0.0508	urn:mavedb:00000060-a-2	TARDBP
1	11022433	A	T	ENSG00000120948	0.3224	urn:mavedb:00000060-a-2	TARDBP
1	11022434	G	A	ENSG00000120948	-0.0768	urn:mavedb:00000060-a-2	TARDBP
1	11022434	G	C	ENSG00000120948	-0.0013	urn:mavedb:00000060-a-2	TARDBP
1	11022434	G	T	ENSG00000120948	0.6146	urn:mavedb:00000060-a-2	TARDBP
1	11022435	C	A	ENSG00000120948	-0.1079	urn:mavedb:00000060-a-2	TARDBP
1	11022435	C	G	ENSG00000120948	-0.1079	urn:mavedb:00000060-a-2	TARDBP
1	11022436	C	A	ENSG00000120948	-0.2792	urn:mavedb:00000060-a-2	TARDBP
1	11022436	C	G	ENSG00000120948	-0.3431	urn:mavedb:00000060-a-2	TARDBP
1	11022436	C	T	ENSG00000120948	0.9863	urn:mavedb:00000060-a-2	TARDBP
1	11022437	A	C	ENSG00000120948	-0.0305	urn:mavedb:00000060-a-2	TARDBP
1	11022437	A	G	ENSG00000120948	-0.0742	urn:mavedb:00000060-a-2	TARDBP
1	11022437	A	T	ENSG00000120948	0.571	urn:mavedb:00000060-a-2	TARDBP
1	11022438	G	C	ENSG00000120948	0.0743	urn:mavedb:00000060-a-2	TARDBP
1	11022438	G	T	ENSG00000120948	0.0743	urn:mavedb:00000060-a-2	TARDBP
1	11022439	C	A	ENSG00000120948	-0.234	urn:mavedb:00000060-a-2	TARDBP
1	11022439	C	G	ENSG00000120948	-0.2088	urn:mavedb:00000060-a-2	TARDBP
1	11022439	C	T	ENSG00000120948	1.0156	urn:mavedb:00000060-a-2	TARDBP
1	11022440	A	C	ENSG00000120948	-0.0235	urn:mavedb:00000060-a-2	TARDBP
1	11022440	A	G	ENSG00000120948	-0.1037	urn:mavedb:00000060-a-2	TARDBP
1	11022440	A	T	ENSG00000120948	0.4591	urn:mavedb:00000060-a-2	TARDBP
1	11022441	G	C	ENSG00000120948	0.066	urn:mavedb:00000060-a-2	TARDBP
1	11022441	G	T	ENSG00000120948	0.066	urn:mavedb:00000060-a-2	TARDBP
1	11022442	A	C	ENSG00000120948	0.0724	urn:mavedb:00000060-a-2	TARDBP
1	11022442	A	G	ENSG00000120948	-0.207	urn:mavedb:00000060-a-2	TARDBP
1	11022442	A	T	ENSG00000120948	0.381	urn:mavedb:00000060-a-2	TARDBP
1	11022443	A	C	ENSG00000120948	0.059	urn:mavedb:00000060-a-2	TARDBP
1	11022443	A	G	ENSG00000120948	0.0867	urn:mavedb:00000060-a-2	TARDBP
1	11022443	A	T	ENSG00000120948	0.3635	urn:mavedb:00000060-a-2	TARDBP
1	11022444	C	A	ENSG00000120948	-0.2369	urn:mavedb:00000060-a-2	TARDBP
1	11022444	C	G	ENSG00000120948	-0.2369	urn:mavedb:00000060-a-2	TARDBP
1	11022445	C	A	ENSG00000120948	-0.2084	urn:mavedb:00000060-a-2	TARDBP
1	11022445	C	G	ENSG00000120948	-0.2118	urn:mavedb:00000060-a-2	TARDBP
1	11022445	C	T	ENSG00000120948	0.8237	urn:mavedb:00000060-a-2	TARDBP
1	11022446	A	C	ENSG00000120948	-0.0143	urn:mavedb:00000060-a-2	TARDBP
1	11022446	A	G	ENSG00000120948	0.0277	urn:mavedb:00000060-a-2	TARDBP
1	11022446	A	T	ENSG00000120948	0.2539	urn:mavedb:00000060-a-2	TARDBP
1	11022447	G	C	ENSG00000120948	0.0955	urn:mavedb:00000060-a-2	TARDBP
1	11022447	G	T	ENSG00000120948	0.0955	urn:mavedb:00000060-a-2	TARDBP
1	11022448	T	A	ENSG00000120948	0.0639	urn:mavedb:00000060-a-2	TARDBP
1	11022448	T	C	ENSG00000120948	0.0275	urn:mavedb:00000060-a-2	TARDBP
1	11022448	T	G	ENSG00000120948	0.0073	urn:mavedb:00000060-a-2	TARDBP
1	11022449	C	A	ENSG00000120948	0.6968	urn:mavedb:00000060-a-2	TARDBP
1	11022449	C	G	ENSG00000120948	0.6968	urn:mavedb:00000060-a-2	TARDBP
1	11022449	C	T	ENSG00000120948	0.2266	urn:mavedb:00000060-a-2	TARDBP
1	11022451	G	A	ENSG00000120948	-0.0222	urn:mavedb:00000060-a-2	TARDBP
1	11022451	G	C	ENSG00000120948	0.0225	urn:mavedb:00000060-a-2	TARDBP
1	11022451	G	T	ENSG00000120948	0.1236	urn:mavedb:00000060-a-2	TARDBP
1	11022452	G	A	ENSG00000120948	-0.1568	urn:mavedb:00000060-a-2	TARDBP
1	11022452	G	C	ENSG00000120948	0.0217	urn:mavedb:00000060-a-2	TARDBP
1	11022452	G	T	ENSG00000120948	-0.0086	urn:mavedb:00000060-a-2	TARDBP
1	11022454	C	A	ENSG00000120948	-0.1189	urn:mavedb:00000060-a-2	TARDBP
1	11022454	C	G	ENSG00000120948	-0.0427	urn:mavedb:00000060-a-2	TARDBP
1	11022454	C	T	ENSG00000120948	-0.0379	urn:mavedb:00000060-a-2	TARDBP
1	11022455	C	A	ENSG00000120948	-0.0725	urn:mavedb:00000060-a-2	TARDBP
1	11022455	C	G	ENSG00000120948	0.0636	urn:mavedb:00000060-a-2	TARDBP
1	11022455	C	T	ENSG00000120948	0.0447	urn:mavedb:00000060-a-2	TARDBP
1	11022457	T	A	ENSG00000120948	0.0396	urn:mavedb:00000060-a-2	TARDBP
1	11022457	T	C	ENSG00000120948	0.0701	urn:mavedb:00000060-a-2	TARDBP
1	11022457	T	G	ENSG00000120948	0.0037	urn:mavedb:00000060-a-2	TARDBP
1	11022458	C	A	ENSG00000120948	0.6863	urn:mavedb:00000060-a-2	TARDBP
1	11022458	C	G	ENSG00000120948	0.3875	urn:mavedb:00000060-a-2	TARDBP
1	11022458	C	T	ENSG00000120948	0.1567	urn:mavedb:00000060-a-2	TARDBP
1	11022460	G	A	ENSG00000120948	0.0208	urn:mavedb:00000060-a-2	TARDBP
1	11022460	G	C	ENSG00000120948	0.0411	urn:mavedb:00000060-a-2	TARDBP
1	11022460	G	T	ENSG00000120948	0.0784	urn:mavedb:00000060-a-2	TARDBP
1	11022461	G	A	ENSG00000120948	-0.1538	urn:mavedb:00000060-a-2	TARDBP
1	11022461	G	C	ENSG00000120948	-0.0782	urn:mavedb:00000060-a-2	TARDBP
1	11022461	G	T	ENSG00000120948	0.0875	urn:mavedb:00000060-a-2	TARDBP
1	11022463	A	C	ENSG00000120948	0.063	urn:mavedb:00000060-a-2	TARDBP
1	11022463	A	G	ENSG00000120948	-0.148	urn:mavedb:00000060-a-2	TARDBP
1	11022463	A	T	ENSG00000120948	0.2651	urn:mavedb:00000060-a-2	TARDBP
1	11022464	A	C	ENSG00000120948	-0.0519	urn:mavedb:00000060-a-2	TARDBP
1	11022464	A	G	ENSG00000120948	0.0314	urn:mavedb:00000060-a-2	TARDBP
1	11022464	A	T	ENSG00000120948	0.0715	urn:mavedb:00000060-a-2	TARDBP
1	11022465	T	A	ENSG00000120948	-0.0884	urn:mavedb:00000060-a-2	TARDBP
1	11022465	T	G	ENSG00000120948	-0.0884	urn:mavedb:00000060-a-2	TARDBP
1	11022466	A	C	ENSG00000120948	0.0603	urn:mavedb:00000060-a-2	TARDBP
1	11022466	A	G	ENSG00000120948	-0.1578	urn:mavedb:00000060-a-2	TARDBP
1	11022466	A	T	ENSG00000120948	0.1966	urn:mavedb:00000060-a-2	TARDBP
1	11022467	A	C	ENSG00000120948	-0.0626	urn:mavedb:00000060-a-2	TARDBP
1	11022467	A	G	ENSG00000120948	-0.0789	urn:mavedb:00000060-a-2	TARDBP
1	11022467	A	T	ENSG00000120948	0.0891	urn:mavedb:00000060-a-2	TARDBP
1	11022468	C	A	ENSG00000120948	-0.0739	urn:mavedb:00000060-a-2	TARDBP
1	11022468	C	G	ENSG00000120948	-0.0739	urn:mavedb:00000060-a-2	TARDBP
1	11022469	C	A	ENSG00000120948	-0.0302	urn:mavedb:00000060-a-2	TARDBP
1	11022469	C	G	ENSG00000120948	-0.1735	urn:mavedb:00000060-a-2	TARDBP
1	11022469	C	T	ENSG00000120948	0.5972	urn:mavedb:00000060-a-2	TARDBP
1	11022470	A	C	ENSG00000120948	-0.0005	urn:mavedb:00000060-a-2	TARDBP
1	11022470	A	G	ENSG00000120948	0.0833	urn:mavedb:00000060-a-2	TARDBP
1	11022470	A	T	ENSG00000120948	0.0784	urn:mavedb:00000060-a-2	TARDBP
1	11022471	A	C	ENSG00000120948	0.0822	urn:mavedb:00000060-a-2	TARDBP
1	11022471	A	T	ENSG00000120948	0.0822	urn:mavedb:00000060-a-2	TARDBP
1	11022472	A	C	ENSG00000120948	0.0639	urn:mavedb:00000060-a-2	TARDBP
1	11022472	A	G	ENSG00000120948	-0.2124	urn:mavedb:00000060-a-2	TARDBP
1	11022472	A	T	ENSG00000120948	0.1971	urn:mavedb:00000060-a-2	TARDBP
1	11022473	A	C	ENSG00000120948	-0.0864	urn:mavedb:00000060-a-2	TARDBP
1	11022473	A	G	ENSG00000120948	-0.0284	urn:mavedb:00000060-a-2	TARDBP
1	11022473	A	T	ENSG00000120948	0.0554	urn:mavedb:00000060-a-2	TARDBP
1	11022474	C	A	ENSG00000120948	-0.0356	urn:mavedb:00000060-a-2	TARDBP
1	11022474	C	G	ENSG00000120948	-0.0356	urn:mavedb:00000060-a-2	TARDBP
1	11022475	C	A	ENSG00000120948	-0.0395	urn:mavedb:00000060-a-2	TARDBP
1	11022475	C	G	ENSG00000120948	-0.1463	urn:mavedb:00000060-a-2	TARDBP
1	11022475	C	T	ENSG00000120948	0.5184	urn:mavedb:00000060-a-2	TARDBP
1	11022476	A	C	ENSG00000120948	0.0864	urn:mavedb:00000060-a-2	TARDBP
1	11022476	A	G	ENSG00000120948	0.131	urn:mavedb:00000060-a-2	TARDBP
1	11022476	A	T	ENSG00000120948	0.1413	urn:mavedb:00000060-a-2	TARDBP
1	11022477	A	C	ENSG00000120948	0.1149	urn:mavedb:00000060-a-2	TARDBP
1	11022477	A	T	ENSG00000120948	0.1149	urn:mavedb:00000060-a-2	TARDBP
1	11022478	G	A	ENSG00000120948	0.0055	urn:mavedb:00000060-a-2	TARDBP
1	11022478	G	C	ENSG00000120948	0.1151	urn:mavedb:00000060-a-2	TARDBP
1	11022478	G	T	ENSG00000120948	0.0999	urn:mavedb:00000060-a-2	TARDBP
1	11022479	G	A	ENSG00000120948	-0.1097	urn:mavedb:00000060-a-2	TARDBP
1	11022479	G	C	ENSG00000120948	-0.0283	urn:mavedb:00000060-a-2	TARDBP
1	11022479	G	T	ENSG00000120948	0.0452	urn:mavedb:00000060-a-2	TARDBP
1	11022481	A	C	ENSG00000120948	0.0804	urn:mavedb:00000060-a-2	TARDBP
1	11022481	A	G	ENSG00000120948	-0.1884	urn:mavedb:00000060-a-2	TARDBP
1	11022481	A	T	ENSG00000120948	0.1982	urn:mavedb:00000060-a-2	TARDBP
1	11022482	A	C	ENSG00000120948	-0.0274	urn:mavedb:00000060-a-2	TARDBP
1	11022482	A	G	ENSG00000120948	-0.025	urn:mavedb:00000060-a-2	TARDBP
1	11022482	A	T	ENSG00000120948	0.0371	urn:mavedb:00000060-a-2	TARDBP
1	11022483	C	A	ENSG00000120948	0.0363	urn:mavedb:00000060-a-2	TARDBP
1	11022483	C	G	ENSG00000120948	0.0363	urn:mavedb:00000060-a-2	TARDBP
1	11022484	A	C	ENSG00000120948	-0.0094	urn:mavedb:00000060-a-2	TARDBP
1	11022484	A	G	ENSG00000120948	-0.0208	urn:mavedb:00000060-a-2	TARDBP
1	11022484	A	T	ENSG00000120948	-0.0094	urn:mavedb:00000060-a-2	TARDBP
1	11022485	T	A	ENSG00000120948	-0.0383	urn:mavedb:00000060-a-2	TARDBP
1	11022485	T	C	ENSG00000120948	-0.0152	urn:mavedb:00000060-a-2	TARDBP
1	11022485	T	G	ENSG00000120948	0.0891	urn:mavedb:00000060-a-2	TARDBP
1	11022486	G	A	ENSG00000120948	-0.0365	urn:mavedb:00000060-a-2	TARDBP
1	11022486	G	C	ENSG00000120948	-0.0365	urn:mavedb:00000060-a-2	TARDBP
1	11022486	G	T	ENSG00000120948	-0.0365	urn:mavedb:00000060-a-2	TARDBP
1	11022487	C	A	ENSG00000120948	-0.0577	urn:mavedb:00000060-a-2	TARDBP
1	11022487	C	G	ENSG00000120948	-0.1629	urn:mavedb:00000060-a-2	TARDBP
1	11022487	C	T	ENSG00000120948	0.5002	urn:mavedb:00000060-a-2	TARDBP
1	11022488	A	C	ENSG00000120948	0.0255	urn:mavedb:00000060-a-2	TARDBP
1	11022488	A	G	ENSG00000120948	0.0756	urn:mavedb:00000060-a-2	TARDBP
1	11022488	A	T	ENSG00000120948	0.0559	urn:mavedb:00000060-a-2	TARDBP
1	11022489	G	C	ENSG00000120948	0.0811	urn:mavedb:00000060-a-2	TARDBP
1	11022489	G	T	ENSG00000120948	0.0811	urn:mavedb:00000060-a-2	TARDBP
1	11022490	A	G	ENSG00000120948	0.0011	urn:mavedb:00000060-a-2	TARDBP
1	11022490	A	T	ENSG00000120948	0.1559	urn:mavedb:00000060-a-2	TARDBP
1	11022491	G	A	ENSG00000120948	-0.1524	urn:mavedb:00000060-a-2	TARDBP
1	11022491	G	C	ENSG00000120948	-0.1617	urn:mavedb:00000060-a-2	TARDBP
1	11022491	G	T	ENSG00000120948	-0.0567	urn:mavedb:00000060-a-2	TARDBP
1	11022492	G	C	ENSG00000120948	-0.1143	urn:mavedb:00000060-a-2	TARDBP
1	11022492	G	T	ENSG00000120948	-0.1143	urn:mavedb:00000060-a-2	TARDBP
1	11022493	G	A	ENSG00000120948	0.0727	urn:mavedb:00000060-a-2	TARDBP
1	11022493	G	C	ENSG00000120948	0.0856	urn:mavedb:00000060-a-2	TARDBP
1	11022493	G	T	ENSG00000120948	0.4492	urn:mavedb:00000060-a-2	TARDBP
1	11022494	A	C	ENSG00000120948	0.1701	urn:mavedb:00000060-a-2	TARDBP
1	11022494	A	G	ENSG00000120948	0.2523	urn:mavedb:00000060-a-2	TARDBP
1	11022494	A	T	ENSG00000120948	0.229	urn:mavedb:00000060-a-2	TARDBP
1	11022495	G	C	ENSG00000120948	0.1169	urn:mavedb:00000060-a-2	TARDBP
1	11022495	G	T	ENSG00000120948	0.1169	urn:mavedb:00000060-a-2	TARDBP
1	11022496	C	A	ENSG00000120948	-0.0069	urn:mavedb:00000060-a-2	TARDBP
1	11022496	C	G	ENSG00000120948	-0.0145	urn:mavedb:00000060-a-2	TARDBP
1	11022496	C	T	ENSG00000120948	0.0369	urn:mavedb:00000060-a-2	TARDBP
1	11022497	C	A	ENSG00000120948	0.04	urn:mavedb:00000060-a-2	TARDBP
1	11022497	C	G	ENSG00000120948	0.1268	urn:mavedb:00000060-a-2	TARDBP
1	11022497	C	T	ENSG00000120948	0.0597	urn:mavedb:00000060-a-2	TARDBP
1	11022499	A	C	ENSG00000120948	0.0398	urn:mavedb:00000060-a-2	TARDBP
1	11022499	A	G	ENSG00000120948	-0.1301	urn:mavedb:00000060-a-2	TARDBP
1	11022499	A	T	ENSG00000120948	0.186	urn:mavedb:00000060-a-2	TARDBP
1	11022500	A	C	ENSG00000120948	0.0208	urn:mavedb:00000060-a-2	TARDBP
1	11022500	A	G	ENSG00000120948	0.0177	urn:mavedb:00000060-a-2	TARDBP
1	11022500	A	T	ENSG00000120948	0.0281	urn:mavedb:00000060-a-2	TARDBP
1	11022501	C	A	ENSG00000120948	-0.0269	urn:mavedb:00000060-a-2	TARDBP
1	11022501	C	G	ENSG00000120948	-0.0269	urn:mavedb:00000060-a-2	TARDBP
1	11022502	C	A	ENSG00000120948	-0.0124	urn:mavedb:00000060-a-2	TARDBP
1	11022502	C	G	ENSG00000120948	-0.0947	urn:mavedb:00000060-a-2	TARDBP
1	11022502	C	T	ENSG00000120948	0.3753	urn:mavedb:00000060-a-2	TARDBP
1	11022503	A	C	ENSG00000120948	0.0795	urn:mavedb:00000060-a-2	TARDBP
1	11022503	A	G	ENSG00000120948	0.2179	urn:mavedb:00000060-a-2	TARDBP
1	11022503	A	T	ENSG00000120948	0.0258	urn:mavedb:00000060-a-2	TARDBP
1	11022504	G	C	ENSG00000120948	0.0376	urn:mavedb:00000060-a-2	TARDBP
1	11022504	G	T	ENSG00000120948	0.0376	urn:mavedb:00000060-a-2	TARDBP
1	11022505	G	A	ENSG00000120948	-0.0008	urn:mavedb:00000060-a-2	TARDBP
1	11022505	G	C	ENSG00000120948	0.046	urn:mavedb:00000060-a-2	TARDBP
1	11022505	G	T	ENSG00000120948	-0.0434	urn:mavedb:00000060-a-2	TARDBP
1	11022506	C	A	ENSG00000120948	-0.1497	urn:mavedb:00000060-a-2	TARDBP
1	11022506	C	G	ENSG00000120948	0.0742	urn:mavedb:00000060-a-2	TARDBP
1	11022506	C	T	ENSG00000120948	-0.0191	urn:mavedb:00000060-a-2	TARDBP
1	11022508	T	A	ENSG00000120948	-0.1505	urn:mavedb:00000060-a-2	TARDBP
1	11022508	T	C	ENSG00000120948	-0.1171	urn:mavedb:00000060-a-2	TARDBP
1	11022508	T	G	ENSG00000120948	-0.1654	urn:mavedb:00000060-a-2	TARDBP
1	11022509	T	A	ENSG00000120948	0.0162	urn:mavedb:00000060-a-2	TARDBP
1	11022509	T	C	ENSG00000120948	-0.1079	urn:mavedb:00000060-a-2	TARDBP
1	11022509	T	G	ENSG00000120948	-0.1223	urn:mavedb:00000060-a-2	TARDBP
1	11022510	C	A	ENSG00000120948	-0.1171	urn:mavedb:00000060-a-2	TARDBP
1	11022510	C	G	ENSG00000120948	-0.1171	urn:mavedb:00000060-a-2	TARDBP
1	11022511	G	A	ENSG00000120948	-0.0427	urn:mavedb:00000060-a-2	TARDBP
1	11022511	G	C	ENSG00000120948	0.0413	urn:mavedb:00000060-a-2	TARDBP
1	11022511	G	T	ENSG00000120948	0.0662	urn:mavedb:00000060-a-2	TARDBP
1	11022512	G	A	ENSG00000120948	-0.1471	urn:mavedb:00000060-a-2	TARDBP
1	11022512	G	C	ENSG00000120948	-0.0013	urn:mavedb:00000060-a-2	TARDBP
1	11022512	G	T	ENSG00000120948	0.0564	urn:mavedb:00000060-a-2	TARDBP
1	11022514	T	A	ENSG00000120948	-0.04	urn:mavedb:00000060-a-2	TARDBP
1	11022514	T	C	ENSG00000120948	0.0361	urn:mavedb:00000060-a-2	TARDBP
1	11022514	T	G	ENSG00000120948	-0.003	urn:mavedb:00000060-a-2	TARDBP
1	11022515	C	A	ENSG00000120948	0.2121	urn:mavedb:00000060-a-2	TARDBP
1	11022515	C	G	ENSG00000120948	0.1113	urn:mavedb:00000060-a-2	TARDBP
1	11022515	C	T	ENSG00000120948	0.2383	urn:mavedb:00000060-a-2	TARDBP
1	11022517	G	A	ENSG00000120948	0.0896	urn:mavedb:00000060-a-2	TARDBP
1	11022517	G	C	ENSG00000120948	0.0896	urn:mavedb:00000060-a-2	TARDBP
1	11022517	G	T	ENSG00000120948	0.4815	urn:mavedb:00000060-a-2	TARDBP
1	11022518	G	A	ENSG00000120948	-0.1633	urn:mavedb:00000060-a-2	TARDBP
1	11022518	G	C	ENSG00000120948	-0.0271	urn:mavedb:00000060-a-2	TARDBP
1	11022518	G	T	ENSG00000120948	0.0078	urn:mavedb:00000060-a-2	TARDBP
1	11022520	A	C	ENSG00000120948	0.0719	urn:mavedb:00000060-a-2	TARDBP
1	11022520	A	G	ENSG00000120948	-0.1882	urn:mavedb:00000060-a-2	TARDBP
1	11022520	A	T	ENSG00000120948	0.162	urn:mavedb:00000060-a-2	TARDBP
1	11022521	A	C	ENSG00000120948	-0.094	urn:mavedb:00000060-a-2	TARDBP
1	11022521	A	G	ENSG00000120948	-0.045	urn:mavedb:00000060-a-2	TARDBP
1	11022521	A	T	ENSG00000120948	0.0932	urn:mavedb:00000060-a-2	TARDBP
1	11022522	T	A	ENSG00000120948	-0.041	urn:mavedb:00000060-a-2	TARDBP
1	11022522	T	G	ENSG00000120948	-0.041	urn:mavedb:00000060-a-2	TARDBP
1	11022523	A	C	ENSG00000120948	-0.019	urn:mavedb:00000060-a-2	TARDBP
1	11022523	A	G	ENSG00000120948	-0.1495	urn:mavedb:00000060-a-2	TARDBP
1	11022523	A	T	ENSG00000120948	0.1962	urn:mavedb:00000060-a-2	TARDBP
1	11022524	A	C	ENSG00000120948	-0.088	urn:mavedb:00000060-a-2	TARDBP
1	11022524	A	G	ENSG00000120948	-0.0938	urn:mavedb:00000060-a-2	TARDBP
1	11022524	A	T	ENSG00000120948	-0.0009	urn:mavedb:00000060-a-2	TARDBP
1	11022525	C	A	ENSG00000120948	-0.0435	urn:mavedb:00000060-a-2	TARDBP
1	11022525	C	G	ENSG00000120948	-0.0435	urn:mavedb:00000060-a-2	TARDBP
1	11022526	T	A	ENSG00000120948	-0.0355	urn:mavedb:00000060-a-2	TARDBP
1	11022526	T	C	ENSG00000120948	0.0264	urn:mavedb:00000060-a-2	TARDBP
1	11022526	T	G	ENSG00000120948	-0.0575	urn:mavedb:00000060-a-2	TARDBP
1	11022527	C	A	ENSG00000120948	0.2236	urn:mavedb:00000060-a-2	TARDBP
1	11022527	C	G	ENSG00000120948	0.0463	urn:mavedb:00000060-a-2	TARDBP
1	11022527	C	T	ENSG00000120948	0.2332	urn:mavedb:00000060-a-2	TARDBP
1	40784094	A	C	ENSG00000117013	0.4599	urn:mavedb:00000094-a-2	KCNQ4
1	40784094	A	G	ENSG00000117013	0.3502	urn:mavedb:00000094-a-2	KCNQ4
1	40784094	A	T	ENSG00000117013	0.4599	urn:mavedb:00000094-a-2	KCNQ4
1	40784095	T	A	ENSG00000117013	0.0711	urn:mavedb:00000094-a-2	KCNQ4
1	40784095	T	C	ENSG00000117013	0.6785	urn:mavedb:00000094-a-2	KCNQ4
1	40784095	T	G	ENSG00000117013	0.0959	urn:mavedb:00000094-a-2	KCNQ4
1	40784096	G	A	ENSG00000117013	0.2845	urn:mavedb:00000094-a-2	KCNQ4
1	40784096	G	C	ENSG00000117013	0.2845	urn:mavedb:00000094-a-2	KCNQ4
1	40784096	G	T	ENSG00000117013	0.2845	urn:mavedb:00000094-a-2	KCNQ4
1	40784097	G	A	ENSG00000117013	0.7087	urn:mavedb:00000094-a-2	KCNQ4
1	40784097	G	C	ENSG00000117013	0.9675	urn:mavedb:00000094-a-2	KCNQ4
1	40784097	G	T	ENSG00000117013	0.6784	urn:mavedb:00000094-a-2	KCNQ4
1	40784098	C	A	ENSG00000117013	0.7807	urn:mavedb:00000094-a-2	KCNQ4
1	40784098	C	G	ENSG00000117013	0.8413	urn:mavedb:00000094-a-2	KCNQ4
1	40784098	C	T	ENSG00000117013	0.9728	urn:mavedb:00000094-a-2	KCNQ4
1	40784100	G	A	ENSG00000117013	1.0116	urn:mavedb:00000094-a-2	KCNQ4
1	40784100	G	C	ENSG00000117013	0.74	urn:mavedb:00000094-a-2	KCNQ4
1	40784101	A	C	ENSG00000117013	1.0076	urn:mavedb:00000094-a-2	KCNQ4
1	40784101	A	G	ENSG00000117013	0.8244	urn:mavedb:00000094-a-2	KCNQ4
1	40784101	A	T	ENSG00000117013	0.8875	urn:mavedb:00000094-a-2	KCNQ4
1	40784102	G	C	ENSG00000117013	0.8593	urn:mavedb:00000094-a-2	KCNQ4
1	40784102	G	T	ENSG00000117013	0.8593	urn:mavedb:00000094-a-2	KCNQ4
1	40784103	G	A	ENSG00000117013	0.7491	urn:mavedb:00000094-a-2	KCNQ4
1	40784103	G	C	ENSG00000117013	1.1807	urn:mavedb:00000094-a-2	KCNQ4
1	40784103	G	T	ENSG00000117013	1.3461	urn:mavedb:00000094-a-2	KCNQ4
1	40784104	C	A	ENSG00000117013	0.9211	urn:mavedb:00000094-a-2	KCNQ4
1	40784104	C	G	ENSG00000117013	0.756	urn:mavedb:00000094-a-2	KCNQ4
1	40784104	C	T	ENSG00000117013	1.05	urn:mavedb:00000094-a-2	KCNQ4
1	40784106	C	A	ENSG00000117013	0.8577	urn:mavedb:00000094-a-2	KCNQ4
1	40784106	C	G	ENSG00000117013	0.7369	urn:mavedb:00000094-a-2	KCNQ4
1	40784106	C	T	ENSG00000117013	0.6429	urn:mavedb:00000094-a-2	KCNQ4
1	40784107	C	A	ENSG00000117013	0.9699	urn:mavedb:00000094-a-2	KCNQ4
1	40784107	C	G	ENSG00000117013	1.0556	urn:mavedb:00000094-a-2	KCNQ4
1	40784107	C	T	ENSG00000117013	1.1601	urn:mavedb:00000094-a-2	KCNQ4
1	40784109	C	A	ENSG00000117013	0.9564	urn:mavedb:00000094-a-2	KCNQ4
1	40784109	C	G	ENSG00000117013	1.1339	urn:mavedb:00000094-a-2	KCNQ4
1	40784109	C	T	ENSG00000117013	0.8934	urn:mavedb:00000094-a-2	KCNQ4
1	40784110	C	A	ENSG00000117013	1.1316	urn:mavedb:00000094-a-2	KCNQ4
1	40784110	C	G	ENSG00000117013	0.7478	urn:mavedb:00000094-a-2	KCNQ4
1	40784110	C	T	ENSG00000117013	0.7199	urn:mavedb:00000094-a-2	KCNQ4
1	40784112	C	A	ENSG00000117013	0.85	urn:mavedb:00000094-a-2	KCNQ4
1	40784112	C	G	ENSG00000117013	0.6442	urn:mavedb:00000094-a-2	KCNQ4
1	40784112	C	T	ENSG00000117013	0.9729	urn:mavedb:00000094-a-2	KCNQ4
1	40784113	G	A	ENSG00000117013	0.839	urn:mavedb:00000094-a-2	KCNQ4
1	40784113	G	C	ENSG00000117013	0.686	urn:mavedb:00000094-a-2	KCNQ4
1	40784113	G	T	ENSG00000117013	1.1768	urn:mavedb:00000094-a-2	KCNQ4
1	40784115	C	A	ENSG00000117013	0.8551	urn:mavedb:00000094-a-2	KCNQ4
1	40784115	C	G	ENSG00000117013	1.3863	urn:mavedb:00000094-a-2	KCNQ4
1	40784115	C	T	ENSG00000117013	0.9027	urn:mavedb:00000094-a-2	KCNQ4
1	40784116	G	A	ENSG00000117013	0.6057	urn:mavedb:00000094-a-2	KCNQ4
1	40784116	G	C	ENSG00000117013	0.9199	urn:mavedb:00000094-a-2	KCNQ4
1	40784116	G	T	ENSG00000117013	1.156	urn:mavedb:00000094-a-2	KCNQ4
1	40784118	C	A	ENSG00000117013	1.1837	urn:mavedb:00000094-a-2	KCNQ4
1	40784118	C	G	ENSG00000117013	0.9226	urn:mavedb:00000094-a-2	KCNQ4
1	40784118	C	T	ENSG00000117013	0.7439	urn:mavedb:00000094-a-2	KCNQ4
1	40784119	T	A	ENSG00000117013	0.7173	urn:mavedb:00000094-a-2	KCNQ4
1	40784119	T	C	ENSG00000117013	0.6985	urn:mavedb:00000094-a-2	KCNQ4
1	40784119	T	G	ENSG00000117013	0.318	urn:mavedb:00000094-a-2	KCNQ4
1	40784121	G	A	ENSG00000117013	1.1575	urn:mavedb:00000094-a-2	KCNQ4
1	40784121	G	C	ENSG00000117013	0.9625	urn:mavedb:00000094-a-2	KCNQ4
1	40784121	G	T	ENSG00000117013	0.8779	urn:mavedb:00000094-a-2	KCNQ4
1	40784122	G	A	ENSG00000117013	0.6155	urn:mavedb:00000094-a-2	KCNQ4
1	40784122	G	C	ENSG00000117013	0.8051	urn:mavedb:00000094-a-2	KCNQ4
1	40784122	G	T	ENSG00000117013	1.4478	urn:mavedb:00000094-a-2	KCNQ4
1	40784124	C	A	ENSG00000117013	1.4936	urn:mavedb:00000094-a-2	KCNQ4
1	40784124	C	G	ENSG00000117013	0.753	urn:mavedb:00000094-a-2	KCNQ4
1	40784125	T	A	ENSG00000117013	0.6589	urn:mavedb:00000094-a-2	KCNQ4
1	40784125	T	C	ENSG00000117013	0.8078	urn:mavedb:00000094-a-2	KCNQ4
1	40784125	T	G	ENSG00000117013	0.978	urn:mavedb:00000094-a-2	KCNQ4
1	40784127	G	A	ENSG00000117013	0.8945	urn:mavedb:00000094-a-2	KCNQ4
1	40784127	G	C	ENSG00000117013	0.6526	urn:mavedb:00000094-a-2	KCNQ4
1	40784127	G	T	ENSG00000117013	0.6252	urn:mavedb:00000094-a-2	KCNQ4
1	40784128	G	A	ENSG00000117013	0.7919	urn:mavedb:00000094-a-2	KCNQ4
1	40784128	G	C	ENSG00000117013	0.6126	urn:mavedb:00000094-a-2	KCNQ4
1	40784128	G	T	ENSG00000117013	1.247	urn:mavedb:00000094-a-2	KCNQ4
1	40784130	C	A	ENSG00000117013	0.6572	urn:mavedb:00000094-a-2	KCNQ4
1	40784130	C	G	ENSG00000117013	0.9262	urn:mavedb:00000094-a-2	KCNQ4
1	40784130	C	T	ENSG00000117013	0.8826	urn:mavedb:00000094-a-2	KCNQ4
1	40784131	C	A	ENSG00000117013	0.9476	urn:mavedb:00000094-a-2	KCNQ4
1	40784131	C	G	ENSG00000117013	0.4567	urn:mavedb:00000094-a-2	KCNQ4
1	40784131	C	T	ENSG00000117013	0.868	urn:mavedb:00000094-a-2	KCNQ4
1	40784133	C	A	ENSG00000117013	1.0666	urn:mavedb:00000094-a-2	KCNQ4
1	40784133	C	G	ENSG00000117013	0.8153	urn:mavedb:00000094-a-2	KCNQ4
1	40784133	C	T	ENSG00000117013	1.4919	urn:mavedb:00000094-a-2	KCNQ4
1	40784134	C	A	ENSG00000117013	0.8211	urn:mavedb:00000094-a-2	KCNQ4
1	40784134	C	G	ENSG00000117013	1.5927	urn:mavedb:00000094-a-2	KCNQ4
1	40784134	C	T	ENSG00000117013	1.2322	urn:mavedb:00000094-a-2	KCNQ4
1	40784136	C	A	ENSG00000117013	1.4619	urn:mavedb:00000094-a-2	KCNQ4
1	40784136	C	G	ENSG00000117013	1.5142	urn:mavedb:00000094-a-2	KCNQ4
1	40784136	C	T	ENSG00000117013	1.185	urn:mavedb:00000094-a-2	KCNQ4
1	40784137	C	A	ENSG00000117013	0.8926	urn:mavedb:00000094-a-2	KCNQ4
1	40784137	C	G	ENSG00000117013	0.9611	urn:mavedb:00000094-a-2	KCNQ4
1	40784137	C	T	ENSG00000117013	0.7484	urn:mavedb:00000094-a-2	KCNQ4
1	40784139	G	A	ENSG00000117013	0.7285	urn:mavedb:00000094-a-2	KCNQ4
1	40784139	G	C	ENSG00000117013	0.7285	urn:mavedb:00000094-a-2	KCNQ4
1	40784139	G	T	ENSG00000117013	0.7839	urn:mavedb:00000094-a-2	KCNQ4
1	40784140	G	A	ENSG00000117013	0.8804	urn:mavedb:00000094-a-2	KCNQ4
1	40784140	G	C	ENSG00000117013	1.0853	urn:mavedb:00000094-a-2	KCNQ4
1	40784140	G	T	ENSG00000117013	0.9105	urn:mavedb:00000094-a-2	KCNQ4
1	40784142	G	A	ENSG00000117013	1.0108	urn:mavedb:00000094-a-2	KCNQ4
1	40784142	G	C	ENSG00000117013	0.7692	urn:mavedb:00000094-a-2	KCNQ4
1	40784142	G	T	ENSG00000117013	0.5976	urn:mavedb:00000094-a-2	KCNQ4
1	40784143	A	C	ENSG00000117013	1.2874	urn:mavedb:00000094-a-2	KCNQ4
1	40784143	A	G	ENSG00000117013	1.3137	urn:mavedb:00000094-a-2	KCNQ4
1	40784143	A	T	ENSG00000117013	0.9315	urn:mavedb:00000094-a-2	KCNQ4
1	40784144	C	A	ENSG00000117013	0.8801	urn:mavedb:00000094-a-2	KCNQ4
1	40784144	C	G	ENSG00000117013	0.8801	urn:mavedb:00000094-a-2	KCNQ4
1	40784145	G	A	ENSG00000117013	0.6848	urn:mavedb:00000094-a-2	KCNQ4
1	40784145	G	C	ENSG00000117013	0.9618	urn:mavedb:00000094-a-2	KCNQ4
1	40784145	G	T	ENSG00000117013	0.9635	urn:mavedb:00000094-a-2	KCNQ4
1	40784146	C	A	ENSG00000117013	0.719	urn:mavedb:00000094-a-2	KCNQ4
1	40784146	C	G	ENSG00000117013	0.9967	urn:mavedb:00000094-a-2	KCNQ4
1	40784146	C	T	ENSG00000117013	1.5131	urn:mavedb:00000094-a-2	KCNQ4
1	40784148	C	A	ENSG00000117013	0.6662	urn:mavedb:00000094-a-2	KCNQ4
1	40784148	C	G	ENSG00000117013	1.0267	urn:mavedb:00000094-a-2	KCNQ4
1	40784148	C	T	ENSG00000117013	0.9545	urn:mavedb:00000094-a-2	KCNQ4
1	40784149	C	A	ENSG00000117013	1.0232	urn:mavedb:00000094-a-2	KCNQ4
1	40784149	C	G	ENSG00000117013	0.8544	urn:mavedb:00000094-a-2	KCNQ4
1	40784149	C	T	ENSG00000117013	1.0011	urn:mavedb:00000094-a-2	KCNQ4
1	40784151	C	A	ENSG00000117013	0.0021	urn:mavedb:00000094-a-2	KCNQ4
1	40784151	C	G	ENSG00000117013	1.2771	urn:mavedb:00000094-a-2	KCNQ4
1	40784151	C	T	ENSG00000117013	1.5963	urn:mavedb:00000094-a-2	KCNQ4
1	40784152	G	A	ENSG00000117013	0.8441	urn:mavedb:00000094-a-2	KCNQ4
1	40784152	G	C	ENSG00000117013	0.8199	urn:mavedb:00000094-a-2	KCNQ4
1	40784152	G	T	ENSG00000117013	0.9782	urn:mavedb:00000094-a-2	KCNQ4
1	40784154	G	A	ENSG00000117013	0.6715	urn:mavedb:00000094-a-2	KCNQ4
1	40784154	G	C	ENSG00000117013	1.3496	urn:mavedb:00000094-a-2	KCNQ4
1	40784154	G	T	ENSG00000117013	0.8532	urn:mavedb:00000094-a-2	KCNQ4
1	40784155	C	A	ENSG00000117013	0.5694	urn:mavedb:00000094-a-2	KCNQ4
1	40784155	C	G	ENSG00000117013	0.6359	urn:mavedb:00000094-a-2	KCNQ4
1	40784155	C	T	ENSG00000117013	0.8118	urn:mavedb:00000094-a-2	KCNQ4
1	40784157	G	A	ENSG00000117013	0.8238	urn:mavedb:00000094-a-2	KCNQ4
1	40784157	G	C	ENSG00000117013	0.6193	urn:mavedb:00000094-a-2	KCNQ4
1	40784158	A	C	ENSG00000117013	0.7575	urn:mavedb:00000094-a-2	KCNQ4
1	40784158	A	G	ENSG00000117013	0.2955	urn:mavedb:00000094-a-2	KCNQ4
1	40784158	A	T	ENSG00000117013	0.8192	urn:mavedb:00000094-a-2	KCNQ4
1	40784159	G	C	ENSG00000117013	0.9081	urn:mavedb:00000094-a-2	KCNQ4
1	40784159	G	T	ENSG00000117013	0.9081	urn:mavedb:00000094-a-2	KCNQ4
1	40784160	C	A	ENSG00000117013	0.5769	urn:mavedb:00000094-a-2	KCNQ4
1	40784160	C	G	ENSG00000117013	0.7846	urn:mavedb:00000094-a-2	KCNQ4
1	40784161	T	A	ENSG00000117013	1.2221	urn:mavedb:00000094-a-2	KCNQ4
1	40784161	T	C	ENSG00000117013	1.1875	urn:mavedb:00000094-a-2	KCNQ4
1	40784161	T	G	ENSG00000117013	0.9153	urn:mavedb:00000094-a-2	KCNQ4
1	40784163	G	A	ENSG00000117013	0.7119	urn:mavedb:00000094-a-2	KCNQ4
1	40784163	G	C	ENSG00000117013	0.9647	urn:mavedb:00000094-a-2	KCNQ4
1	40784163	G	T	ENSG00000117013	0.9647	urn:mavedb:00000094-a-2	KCNQ4
1	40784164	T	A	ENSG00000117013	0.7361	urn:mavedb:00000094-a-2	KCNQ4
1	40784164	T	C	ENSG00000117013	0.8504	urn:mavedb:00000094-a-2	KCNQ4
1	40784164	T	G	ENSG00000117013	0.5654	urn:mavedb:00000094-a-2	KCNQ4
1	40784166	G	A	ENSG00000117013	0.6155	urn:mavedb:00000094-a-2	KCNQ4
1	40784166	G	C	ENSG00000117013	0.9325	urn:mavedb:00000094-a-2	KCNQ4
1	40784166	G	T	ENSG00000117013	0.7774	urn:mavedb:00000094-a-2	KCNQ4
1	40784167	C	A	ENSG00000117013	0.9021	urn:mavedb:00000094-a-2	KCNQ4
1	40784167	C	G	ENSG00000117013	1.2678	urn:mavedb:00000094-a-2	KCNQ4
1	40784167	C	T	ENSG00000117013	0.582	urn:mavedb:00000094-a-2	KCNQ4
1	40784169	C	A	ENSG00000117013	1.0974	urn:mavedb:00000094-a-2	KCNQ4
1	40784169	C	G	ENSG00000117013	0.9117	urn:mavedb:00000094-a-2	KCNQ4
1	40784169	C	T	ENSG00000117013	0.8251	urn:mavedb:00000094-a-2	KCNQ4
1	40784170	T	A	ENSG00000117013	1.4722	urn:mavedb:00000094-a-2	KCNQ4
1	40784170	T	C	ENSG00000117013	0.6493	urn:mavedb:00000094-a-2	KCNQ4
1	40784170	T	G	ENSG00000117013	0.7337	urn:mavedb:00000094-a-2	KCNQ4
1	40784172	A	C	ENSG00000117013	0.6818	urn:mavedb:00000094-a-2	KCNQ4
1	40784172	A	G	ENSG00000117013	1.0116	urn:mavedb:00000094-a-2	KCNQ4
1	40784172	A	T	ENSG00000117013	0.7947	urn:mavedb:00000094-a-2	KCNQ4
1	40784173	C	A	ENSG00000117013	0.9644	urn:mavedb:00000094-a-2	KCNQ4
1	40784173	C	G	ENSG00000117013	1.0282	urn:mavedb:00000094-a-2	KCNQ4
1	40784173	C	T	ENSG00000117013	0.8371	urn:mavedb:00000094-a-2	KCNQ4
1	40784175	G	A	ENSG00000117013	0.8033	urn:mavedb:00000094-a-2	KCNQ4
1	40784175	G	C	ENSG00000117013	1.0451	urn:mavedb:00000094-a-2	KCNQ4
1	40784175	G	T	ENSG00000117013	0.7829	urn:mavedb:00000094-a-2	KCNQ4
1	40784176	C	A	ENSG00000117013	0.4563	urn:mavedb:00000094-a-2	KCNQ4
1	40784176	C	G	ENSG00000117013	0.6444	urn:mavedb:00000094-a-2	KCNQ4
1	40784176	C	T	ENSG00000117013	0.9404	urn:mavedb:00000094-a-2	KCNQ4
1	40784178	G	A	ENSG00000117013	0.7819	urn:mavedb:00000094-a-2	KCNQ4
1	40784178	G	C	ENSG00000117013	0.8422	urn:mavedb:00000094-a-2	KCNQ4
1	40784178	G	T	ENSG00000117013	0.8422	urn:mavedb:00000094-a-2	KCNQ4
1	40784179	T	A	ENSG00000117013	1.1739	urn:mavedb:00000094-a-2	KCNQ4
1	40784179	T	C	ENSG00000117013	0.7744	urn:mavedb:00000094-a-2	KCNQ4
1	40784179	T	G	ENSG00000117013	0.7562	urn:mavedb:00000094-a-2	KCNQ4
1	40784181	C	A	ENSG00000117013	1.0667	urn:mavedb:00000094-a-2	KCNQ4
1	40784181	C	G	ENSG00000117013	0.8524	urn:mavedb:00000094-a-2	KCNQ4
1	40784182	A	C	ENSG00000117013	0.6506	urn:mavedb:00000094-a-2	KCNQ4
1	40784182	A	G	ENSG00000117013	0.8269	urn:mavedb:00000094-a-2	KCNQ4
1	40784182	A	T	ENSG00000117013	0.7997	urn:mavedb:00000094-a-2	KCNQ4
1	40784183	G	C	ENSG00000117013	0.8724	urn:mavedb:00000094-a-2	KCNQ4
1	40784183	G	T	ENSG00000117013	0.8724	urn:mavedb:00000094-a-2	KCNQ4
1	40784184	A	C	ENSG00000117013	0.6636	urn:mavedb:00000094-a-2	KCNQ4
1	40784184	A	G	ENSG00000117013	1.7173	urn:mavedb:00000094-a-2	KCNQ4
1	40784184	A	T	ENSG00000117013	1.1415	urn:mavedb:00000094-a-2	KCNQ4
1	40784185	G	A	ENSG00000117013	0.9328	urn:mavedb:00000094-a-2	KCNQ4
1	40784185	G	C	ENSG00000117013	0.6655	urn:mavedb:00000094-a-2	KCNQ4
1	40784185	G	T	ENSG00000117013	0.7331	urn:mavedb:00000094-a-2	KCNQ4
1	40784186	C	A	ENSG00000117013	0.6636	urn:mavedb:00000094-a-2	KCNQ4
1	40784186	C	G	ENSG00000117013	0.6636	urn:mavedb:00000094-a-2	KCNQ4
1	40784187	G	A	ENSG00000117013	0.8226	urn:mavedb:00000094-a-2	KCNQ4
1	40784187	G	C	ENSG00000117013	0.7553	urn:mavedb:00000094-a-2	KCNQ4
1	40784188	A	C	ENSG00000117013	0.8364	urn:mavedb:00000094-a-2	KCNQ4
1	40784188	A	G	ENSG00000117013	0.9723	urn:mavedb:00000094-a-2	KCNQ4
1	40784188	A	T	ENSG00000117013	0.9034	urn:mavedb:00000094-a-2	KCNQ4
1	40784189	A	C	ENSG00000117013	0.8406	urn:mavedb:00000094-a-2	KCNQ4
1	40784189	A	T	ENSG00000117013	0.8406	urn:mavedb:00000094-a-2	KCNQ4
1	40784190	C	A	ENSG00000117013	1.1889	urn:mavedb:00000094-a-2	KCNQ4
1	40784190	C	G	ENSG00000117013	1.1705	urn:mavedb:00000094-a-2	KCNQ4
1	40784191	A	C	ENSG00000117013	0.6658	urn:mavedb:00000094-a-2	KCNQ4
1	40784191	A	G	ENSG00000117013	1.0402	urn:mavedb:00000094-a-2	KCNQ4
1	40784191	A	T	ENSG00000117013	0.9573	urn:mavedb:00000094-a-2	KCNQ4
1	40784192	G	C	ENSG00000117013	0.7314	urn:mavedb:00000094-a-2	KCNQ4
1	40784192	G	T	ENSG00000117013	0.7314	urn:mavedb:00000094-a-2	KCNQ4
1	40784193	G	A	ENSG00000117013	0.8418	urn:mavedb:00000094-a-2	KCNQ4
1	40784193	G	C	ENSG00000117013	1.3564	urn:mavedb:00000094-a-2	KCNQ4
1	40784193	G	T	ENSG00000117013	1.2427	urn:mavedb:00000094-a-2	KCNQ4
1	40784194	G	A	ENSG00000117013	0.8463	urn:mavedb:00000094-a-2	KCNQ4
1	40784194	G	C	ENSG00000117013	0.7941	urn:mavedb:00000094-a-2	KCNQ4
1	40784194	G	T	ENSG00000117013	0.4974	urn:mavedb:00000094-a-2	KCNQ4
1	40784196	G	A	ENSG00000117013	0.6743	urn:mavedb:00000094-a-2	KCNQ4
1	40784196	G	C	ENSG00000117013	0.9836	urn:mavedb:00000094-a-2	KCNQ4
1	40784197	A	C	ENSG00000117013	0.6972	urn:mavedb:00000094-a-2	KCNQ4
1	40784197	A	G	ENSG00000117013	1.1743	urn:mavedb:00000094-a-2	KCNQ4
1	40784197	A	T	ENSG00000117013	0.7143	urn:mavedb:00000094-a-2	KCNQ4
1	40784198	G	C	ENSG00000117013	1.1315	urn:mavedb:00000094-a-2	KCNQ4
1	40784198	G	T	ENSG00000117013	1.1315	urn:mavedb:00000094-a-2	KCNQ4
1	40784199	G	A	ENSG00000117013	0.9011	urn:mavedb:00000094-a-2	KCNQ4
1	40784199	G	C	ENSG00000117013	0.7918	urn:mavedb:00000094-a-2	KCNQ4
1	40784199	G	T	ENSG00000117013	1.3252	urn:mavedb:00000094-a-2	KCNQ4
1	40784200	C	A	ENSG00000117013	0.885	urn:mavedb:00000094-a-2	KCNQ4
1	40784200	C	G	ENSG00000117013	0.9554	urn:mavedb:00000094-a-2	KCNQ4
1	40784200	C	T	ENSG00000117013	1.6206	urn:mavedb:00000094-a-2	KCNQ4
1	40784202	G	A	ENSG00000117013	0.7761	urn:mavedb:00000094-a-2	KCNQ4
1	40784202	G	C	ENSG00000117013	1.0811	urn:mavedb:00000094-a-2	KCNQ4
1	40784202	G	T	ENSG00000117013	0.94	urn:mavedb:00000094-a-2	KCNQ4
1	40784203	G	A	ENSG00000117013	0.912	urn:mavedb:00000094-a-2	KCNQ4
1	40784203	G	C	ENSG00000117013	1.0784	urn:mavedb:00000094-a-2	KCNQ4
1	40784203	G	T	ENSG00000117013	1.0581	urn:mavedb:00000094-a-2	KCNQ4
1	40784205	G	A	ENSG00000117013	0.8109	urn:mavedb:00000094-a-2	KCNQ4
1	40784205	G	C	ENSG00000117013	0.8109	urn:mavedb:00000094-a-2	KCNQ4
1	40784205	G	T	ENSG00000117013	0.4546	urn:mavedb:00000094-a-2	KCNQ4
1	40784206	G	A	ENSG00000117013	0.6598	urn:mavedb:00000094-a-2	KCNQ4
1	40784206	G	C	ENSG00000117013	0.9519	urn:mavedb:00000094-a-2	KCNQ4
1	40784206	G	T	ENSG00000117013	0.6964	urn:mavedb:00000094-a-2	KCNQ4
1	40784208	G	A	ENSG00000117013	1.0773	urn:mavedb:00000094-a-2	KCNQ4
1	40784208	G	C	ENSG00000117013	0.64	urn:mavedb:00000094-a-2	KCNQ4
1	40784208	G	T	ENSG00000117013	0.8183	urn:mavedb:00000094-a-2	KCNQ4
1	40784209	G	A	ENSG00000117013	0.7859	urn:mavedb:00000094-a-2	KCNQ4
1	40784209	G	C	ENSG00000117013	0.7537	urn:mavedb:00000094-a-2	KCNQ4
1	40784209	G	T	ENSG00000117013	0.6417	urn:mavedb:00000094-a-2	KCNQ4
1	40784211	G	A	ENSG00000117013	0.8048	urn:mavedb:00000094-a-2	KCNQ4
1	40784211	G	C	ENSG00000117013	0.8936	urn:mavedb:00000094-a-2	KCNQ4
1	40784211	G	T	ENSG00000117013	0.86	urn:mavedb:00000094-a-2	KCNQ4
1	40784212	G	A	ENSG00000117013	0.7825	urn:mavedb:00000094-a-2	KCNQ4
1	40784212	G	C	ENSG00000117013	1.1844	urn:mavedb:00000094-a-2	KCNQ4
1	40784212	G	T	ENSG00000117013	0.7132	urn:mavedb:00000094-a-2	KCNQ4
1	40784214	T	A	ENSG00000117013	0.9136	urn:mavedb:00000094-a-2	KCNQ4
1	40784214	T	C	ENSG00000117013	0.7537	urn:mavedb:00000094-a-2	KCNQ4
1	40784214	T	G	ENSG00000117013	0.9087	urn:mavedb:00000094-a-2	KCNQ4
1	40784215	C	A	ENSG00000117013	0.9035	urn:mavedb:00000094-a-2	KCNQ4
1	40784215	C	G	ENSG00000117013	0.7768	urn:mavedb:00000094-a-2	KCNQ4
1	40784215	C	T	ENSG00000117013	0.015	urn:mavedb:00000094-a-2	KCNQ4
1	40784217	C	A	ENSG00000117013	1.1317	urn:mavedb:00000094-a-2	KCNQ4
1	40784217	C	G	ENSG00000117013	0.6647	urn:mavedb:00000094-a-2	KCNQ4
1	40784217	C	T	ENSG00000117013	0.8212	urn:mavedb:00000094-a-2	KCNQ4
1	40784218	C	A	ENSG00000117013	0.9145	urn:mavedb:00000094-a-2	KCNQ4
1	40784218	C	G	ENSG00000117013	0.7085	urn:mavedb:00000094-a-2	KCNQ4
1	40784218	C	T	ENSG00000117013	0.7386	urn:mavedb:00000094-a-2	KCNQ4
1	40784220	C	A	ENSG00000117013	0.0115	urn:mavedb:00000094-a-2	KCNQ4
1	40784220	C	G	ENSG00000117013	0.9105	urn:mavedb:00000094-a-2	KCNQ4
1	40784220	C	T	ENSG00000117013	0.6814	urn:mavedb:00000094-a-2	KCNQ4
1	40784221	G	A	ENSG00000117013	1.5602	urn:mavedb:00000094-a-2	KCNQ4
1	40784221	G	C	ENSG00000117013	0.884	urn:mavedb:00000094-a-2	KCNQ4
1	40784221	G	T	ENSG00000117013	0.8467	urn:mavedb:00000094-a-2	KCNQ4
1	40784223	C	A	ENSG00000117013	0.6761	urn:mavedb:00000094-a-2	KCNQ4
1	40784223	C	G	ENSG00000117013	0.9312	urn:mavedb:00000094-a-2	KCNQ4
1	40784223	C	T	ENSG00000117013	0.8508	urn:mavedb:00000094-a-2	KCNQ4
1	40784224	G	A	ENSG00000117013	0.9027	urn:mavedb:00000094-a-2	KCNQ4
1	40784224	G	C	ENSG00000117013	0.6926	urn:mavedb:00000094-a-2	KCNQ4
1	40784224	G	T	ENSG00000117013	1.1487	urn:mavedb:00000094-a-2	KCNQ4
1	40784226	C	A	ENSG00000117013	0.9964	urn:mavedb:00000094-a-2	KCNQ4
1	40784226	C	G	ENSG00000117013	0.9917	urn:mavedb:00000094-a-2	KCNQ4
1	40784226	C	T	ENSG00000117013	1.3027	urn:mavedb:00000094-a-2	KCNQ4
1	40784227	T	A	ENSG00000117013	0.8685	urn:mavedb:00000094-a-2	KCNQ4
1	40784227	T	C	ENSG00000117013	0.8623	urn:mavedb:00000094-a-2	KCNQ4
1	40784227	T	G	ENSG00000117013	1.1289	urn:mavedb:00000094-a-2	KCNQ4
1	40784229	G	A	ENSG00000117013	0.839	urn:mavedb:00000094-a-2	KCNQ4
1	40784229	G	C	ENSG00000117013	0.8857	urn:mavedb:00000094-a-2	KCNQ4
1	40784229	G	T	ENSG00000117013	0.6607	urn:mavedb:00000094-a-2	KCNQ4
1	40784230	G	A	ENSG00000117013	0.7184	urn:mavedb:00000094-a-2	KCNQ4
1	40784230	G	C	ENSG00000117013	1.0845	urn:mavedb:00000094-a-2	KCNQ4
1	40784230	G	T	ENSG00000117013	1.2071	urn:mavedb:00000094-a-2	KCNQ4
1	40784232	C	A	ENSG00000117013	0.7244	urn:mavedb:00000094-a-2	KCNQ4
1	40784232	C	G	ENSG00000117013	0.8789	urn:mavedb:00000094-a-2	KCNQ4
1	40784232	C	T	ENSG00000117013	0.3484	urn:mavedb:00000094-a-2	KCNQ4
1	40784233	T	A	ENSG00000117013	0.9217	urn:mavedb:00000094-a-2	KCNQ4
1	40784233	T	C	ENSG00000117013	0.7688	urn:mavedb:00000094-a-2	KCNQ4
1	40784233	T	G	ENSG00000117013	1.0193	urn:mavedb:00000094-a-2	KCNQ4
1	40784235	C	A	ENSG00000117013	0.8025	urn:mavedb:00000094-a-2	KCNQ4
1	40784235	C	G	ENSG00000117013	0.6639	urn:mavedb:00000094-a-2	KCNQ4
1	40784236	T	A	ENSG00000117013	0.9974	urn:mavedb:00000094-a-2	KCNQ4
1	40784236	T	C	ENSG00000117013	0.084	urn:mavedb:00000094-a-2	KCNQ4
1	40784236	T	G	ENSG00000117013	0.9286	urn:mavedb:00000094-a-2	KCNQ4
1	40784238	G	A	ENSG00000117013	0.4305	urn:mavedb:00000094-a-2	KCNQ4
1	40784238	G	C	ENSG00000117013	0.9735	urn:mavedb:00000094-a-2	KCNQ4
1	40784238	G	T	ENSG00000117013	0.9322	urn:mavedb:00000094-a-2	KCNQ4
1	40784239	G	A	ENSG00000117013	0.6519	urn:mavedb:00000094-a-2	KCNQ4
1	40784239	G	C	ENSG00000117013	0.7167	urn:mavedb:00000094-a-2	KCNQ4
1	40784239	G	T	ENSG00000117013	0.3291	urn:mavedb:00000094-a-2	KCNQ4
1	40784241	A	C	ENSG00000117013	1.2389	urn:mavedb:00000094-a-2	KCNQ4
1	40784241	A	G	ENSG00000117013	0.8162	urn:mavedb:00000094-a-2	KCNQ4
1	40784241	A	T	ENSG00000117013	0.1249	urn:mavedb:00000094-a-2	KCNQ4
1	40784242	G	A	ENSG00000117013	0.825	urn:mavedb:00000094-a-2	KCNQ4
1	40784242	G	C	ENSG00000117013	0.9169	urn:mavedb:00000094-a-2	KCNQ4
1	40784242	G	T	ENSG00000117013	1.0986	urn:mavedb:00000094-a-2	KCNQ4
1	40784243	C	A	ENSG00000117013	1.2389	urn:mavedb:00000094-a-2	KCNQ4
1	40784243	C	G	ENSG00000117013	1.2389	urn:mavedb:00000094-a-2	KCNQ4
1	40784244	C	A	ENSG00000117013	0.3357	urn:mavedb:00000094-a-2	KCNQ4
1	40784244	C	G	ENSG00000117013	0.974	urn:mavedb:00000094-a-2	KCNQ4
1	40784244	C	T	ENSG00000117013	1.2261	urn:mavedb:00000094-a-2	KCNQ4
1	40784245	C	A	ENSG00000117013	0.7922	urn:mavedb:00000094-a-2	KCNQ4
1	40784245	C	G	ENSG00000117013	1.0665	urn:mavedb:00000094-a-2	KCNQ4
1	40784245	C	T	ENSG00000117013	1.0437	urn:mavedb:00000094-a-2	KCNQ4
1	40784247	C	A	ENSG00000117013	1.3103	urn:mavedb:00000094-a-2	KCNQ4
1	40784247	C	G	ENSG00000117013	1.1424	urn:mavedb:00000094-a-2	KCNQ4
1	40784248	T	A	ENSG00000117013	0.933	urn:mavedb:00000094-a-2	KCNQ4
1	40784248	T	C	ENSG00000117013	0.8198	urn:mavedb:00000094-a-2	KCNQ4
1	40784248	T	G	ENSG00000117013	1.0817	urn:mavedb:00000094-a-2	KCNQ4
1	40784250	C	A	ENSG00000117013	0.9376	urn:mavedb:00000094-a-2	KCNQ4
1	40784250	C	G	ENSG00000117013	1.2605	urn:mavedb:00000094-a-2	KCNQ4
1	40784250	C	T	ENSG00000117013	1.1502	urn:mavedb:00000094-a-2	KCNQ4
1	40784251	C	A	ENSG00000117013	1.2996	urn:mavedb:00000094-a-2	KCNQ4
1	40784251	C	G	ENSG00000117013	1.5237	urn:mavedb:00000094-a-2	KCNQ4
1	40784251	C	T	ENSG00000117013	1.1645	urn:mavedb:00000094-a-2	KCNQ4
1	40784253	C	A	ENSG00000117013	1.0758	urn:mavedb:00000094-a-2	KCNQ4
1	40784253	C	G	ENSG00000117013	0.7378	urn:mavedb:00000094-a-2	KCNQ4
1	40784253	C	T	ENSG00000117013	1.3008	urn:mavedb:00000094-a-2	KCNQ4
1	40784254	C	A	ENSG00000117013	1.1528	urn:mavedb:00000094-a-2	KCNQ4
1	40784254	C	G	ENSG00000117013	1.1232	urn:mavedb:00000094-a-2	KCNQ4
1	40784254	C	T	ENSG00000117013	1.1336	urn:mavedb:00000094-a-2	KCNQ4
1	40784256	G	A	ENSG00000117013	1.3071	urn:mavedb:00000094-a-2	KCNQ4
1	40784256	G	C	ENSG00000117013	1.1224	urn:mavedb:00000094-a-2	KCNQ4
1	40784256	G	T	ENSG00000117013	1.4166	urn:mavedb:00000094-a-2	KCNQ4
1	40784257	G	A	ENSG00000117013	1.7462	urn:mavedb:00000094-a-2	KCNQ4
1	40784257	G	C	ENSG00000117013	1.1884	urn:mavedb:00000094-a-2	KCNQ4
1	40784257	G	T	ENSG00000117013	1.0713	urn:mavedb:00000094-a-2	KCNQ4
1	40784259	G	A	ENSG00000117013	1.0764	urn:mavedb:00000094-a-2	KCNQ4
1	40784259	G	C	ENSG00000117013	0.633	urn:mavedb:00000094-a-2	KCNQ4
1	40784259	G	T	ENSG00000117013	0.8558	urn:mavedb:00000094-a-2	KCNQ4
1	40784260	C	A	ENSG00000117013	1.1753	urn:mavedb:00000094-a-2	KCNQ4
1	40784260	C	G	ENSG00000117013	0.7217	urn:mavedb:00000094-a-2	KCNQ4
1	40784260	C	T	ENSG00000117013	1.1951	urn:mavedb:00000094-a-2	KCNQ4
1	40784262	C	A	ENSG00000117013	0.9651	urn:mavedb:00000094-a-2	KCNQ4
1	40784262	C	G	ENSG00000117013	1.4905	urn:mavedb:00000094-a-2	KCNQ4
1	40784262	C	T	ENSG00000117013	1.5063	urn:mavedb:00000094-a-2	KCNQ4
1	40784263	C	A	ENSG00000117013	1.5774	urn:mavedb:00000094-a-2	KCNQ4
1	40784263	C	G	ENSG00000117013	1.5697	urn:mavedb:00000094-a-2	KCNQ4
1	40784263	C	T	ENSG00000117013	1.3943	urn:mavedb:00000094-a-2	KCNQ4
1	40784265	C	A	ENSG00000117013	1.7845	urn:mavedb:00000094-a-2	KCNQ4
1	40784265	C	G	ENSG00000117013	1.15	urn:mavedb:00000094-a-2	KCNQ4
1	40784265	C	T	ENSG00000117013	1.2235	urn:mavedb:00000094-a-2	KCNQ4
1	40784266	T	A	ENSG00000117013	0.9316	urn:mavedb:00000094-a-2	KCNQ4
1	40784266	T	C	ENSG00000117013	1.5291	urn:mavedb:00000094-a-2	KCNQ4
1	40784266	T	G	ENSG00000117013	1.2433	urn:mavedb:00000094-a-2	KCNQ4
1	40784268	C	A	ENSG00000117013	1.1887	urn:mavedb:00000094-a-2	KCNQ4
1	40784268	C	G	ENSG00000117013	0.9203	urn:mavedb:00000094-a-2	KCNQ4
1	40784268	C	T	ENSG00000117013	0.8978	urn:mavedb:00000094-a-2	KCNQ4
1	40784269	C	A	ENSG00000117013	0.9482	urn:mavedb:00000094-a-2	KCNQ4
1	40784269	C	G	ENSG00000117013	0.9296	urn:mavedb:00000094-a-2	KCNQ4
1	40784269	C	T	ENSG00000117013	1.1641	urn:mavedb:00000094-a-2	KCNQ4
1	40784271	G	A	ENSG00000117013	1.0771	urn:mavedb:00000094-a-2	KCNQ4
1	40784271	G	C	ENSG00000117013	1.0771	urn:mavedb:00000094-a-2	KCNQ4
1	40784271	G	T	ENSG00000117013	1.2266	urn:mavedb:00000094-a-2	KCNQ4
1	40784272	G	A	ENSG00000117013	0.7708	urn:mavedb:00000094-a-2	KCNQ4
1	40784272	G	C	ENSG00000117013	0.9837	urn:mavedb:00000094-a-2	KCNQ4
1	40784272	G	T	ENSG00000117013	0.6711	urn:mavedb:00000094-a-2	KCNQ4
1	40784274	C	A	ENSG00000117013	0.9821	urn:mavedb:00000094-a-2	KCNQ4
1	40784274	C	G	ENSG00000117013	0.7744	urn:mavedb:00000094-a-2	KCNQ4
1	40784274	C	T	ENSG00000117013	1.1152	urn:mavedb:00000094-a-2	KCNQ4
1	40784275	C	A	ENSG00000117013	0.7121	urn:mavedb:00000094-a-2	KCNQ4
1	40784275	C	G	ENSG00000117013	0.7987	urn:mavedb:00000094-a-2	KCNQ4
1	40784275	C	T	ENSG00000117013	1.0936	urn:mavedb:00000094-a-2	KCNQ4
1	40784277	G	A	ENSG00000117013	0.868	urn:mavedb:00000094-a-2	KCNQ4
1	40784277	G	C	ENSG00000117013	0.9274	urn:mavedb:00000094-a-2	KCNQ4
1	40784277	G	T	ENSG00000117013	1.1159	urn:mavedb:00000094-a-2	KCNQ4
1	40784278	G	A	ENSG00000117013	1.2384	urn:mavedb:00000094-a-2	KCNQ4
1	40784278	G	C	ENSG00000117013	1.2354	urn:mavedb:00000094-a-2	KCNQ4
1	40784278	G	T	ENSG00000117013	1.0066	urn:mavedb:00000094-a-2	KCNQ4
1	40784280	T	A	ENSG00000117013	1.0156	urn:mavedb:00000094-a-2	KCNQ4
1	40784280	T	C	ENSG00000117013	0.9279	urn:mavedb:00000094-a-2	KCNQ4
1	40784280	T	G	ENSG00000117013	0.7679	urn:mavedb:00000094-a-2	KCNQ4
1	40784281	C	A	ENSG00000117013	1.0745	urn:mavedb:00000094-a-2	KCNQ4
1	40784281	C	G	ENSG00000117013	1.4571	urn:mavedb:00000094-a-2	KCNQ4
1	40784281	C	T	ENSG00000117013	1.0795	urn:mavedb:00000094-a-2	KCNQ4
1	40784283	G	A	ENSG00000117013	1.0757	urn:mavedb:00000094-a-2	KCNQ4
1	40784283	G	C	ENSG00000117013	0.0159	urn:mavedb:00000094-a-2	KCNQ4
1	40784283	G	T	ENSG00000117013	1.1106	urn:mavedb:00000094-a-2	KCNQ4
1	40784284	G	A	ENSG00000117013	0.9118	urn:mavedb:00000094-a-2	KCNQ4
1	40784284	G	C	ENSG00000117013	1.2797	urn:mavedb:00000094-a-2	KCNQ4
1	40784284	G	T	ENSG00000117013	0.9319	urn:mavedb:00000094-a-2	KCNQ4
1	40784286	T	A	ENSG00000117013	1.0817	urn:mavedb:00000094-a-2	KCNQ4
1	40784286	T	C	ENSG00000117013	1.1202	urn:mavedb:00000094-a-2	KCNQ4
1	40784286	T	G	ENSG00000117013	0.9968	urn:mavedb:00000094-a-2	KCNQ4
1	40784287	C	G	ENSG00000117013	0.9876	urn:mavedb:00000094-a-2	KCNQ4
1	40784287	C	T	ENSG00000117013	0.9462	urn:mavedb:00000094-a-2	KCNQ4
1	40784289	G	A	ENSG00000117013	0.7662	urn:mavedb:00000094-a-2	KCNQ4
1	40784289	G	C	ENSG00000117013	0.9782	urn:mavedb:00000094-a-2	KCNQ4
1	40784289	G	T	ENSG00000117013	0.8522	urn:mavedb:00000094-a-2	KCNQ4
1	40784290	G	A	ENSG00000117013	1.1279	urn:mavedb:00000094-a-2	KCNQ4
1	40784290	G	C	ENSG00000117013	0.9016	urn:mavedb:00000094-a-2	KCNQ4
1	40784290	G	T	ENSG00000117013	1.3051	urn:mavedb:00000094-a-2	KCNQ4
1	40784292	T	A	ENSG00000117013	0.9308	urn:mavedb:00000094-a-2	KCNQ4
1	40784292	T	C	ENSG00000117013	1.1256	urn:mavedb:00000094-a-2	KCNQ4
1	40784292	T	G	ENSG00000117013	1.0661	urn:mavedb:00000094-a-2	KCNQ4
1	40784293	C	A	ENSG00000117013	0.8091	urn:mavedb:00000094-a-2	KCNQ4
1	40784293	C	G	ENSG00000117013	0.9364	urn:mavedb:00000094-a-2	KCNQ4
1	40784293	C	T	ENSG00000117013	1.3391	urn:mavedb:00000094-a-2	KCNQ4
1	40784295	G	A	ENSG00000117013	1.0706	urn:mavedb:00000094-a-2	KCNQ4
1	40784295	G	C	ENSG00000117013	0.8101	urn:mavedb:00000094-a-2	KCNQ4
1	40784295	G	T	ENSG00000117013	0.9183	urn:mavedb:00000094-a-2	KCNQ4
1	40784296	C	A	ENSG00000117013	1.1521	urn:mavedb:00000094-a-2	KCNQ4
1	40784296	C	G	ENSG00000117013	0.8601	urn:mavedb:00000094-a-2	KCNQ4
1	40784296	C	T	ENSG00000117013	0.7336	urn:mavedb:00000094-a-2	KCNQ4
1	40784298	T	A	ENSG00000117013	1.0732	urn:mavedb:00000094-a-2	KCNQ4
1	40784298	T	C	ENSG00000117013	1.2122	urn:mavedb:00000094-a-2	KCNQ4
1	40784298	T	G	ENSG00000117013	0.645	urn:mavedb:00000094-a-2	KCNQ4
1	40784299	G	A	ENSG00000117013	1.3482	urn:mavedb:00000094-a-2	KCNQ4
1	40784299	G	C	ENSG00000117013	1.0732	urn:mavedb:00000094-a-2	KCNQ4
1	40784299	G	T	ENSG00000117013	0.9148	urn:mavedb:00000094-a-2	KCNQ4
1	40784300	C	G	ENSG00000117013	0.7625	urn:mavedb:00000094-a-2	KCNQ4
1	40784301	G	A	ENSG00000117013	0.9784	urn:mavedb:00000094-a-2	KCNQ4
1	40784301	G	C	ENSG00000117013	1.028	urn:mavedb:00000094-a-2	KCNQ4
1	40784301	G	T	ENSG00000117013	1.0296	urn:mavedb:00000094-a-2	KCNQ4
1	40784302	G	A	ENSG00000117013	0.9198	urn:mavedb:00000094-a-2	KCNQ4
1	40784302	G	C	ENSG00000117013	1.3602	urn:mavedb:00000094-a-2	KCNQ4
1	40784302	G	T	ENSG00000117013	0.7458	urn:mavedb:00000094-a-2	KCNQ4
1	40784304	C	A	ENSG00000117013	0.9084	urn:mavedb:00000094-a-2	KCNQ4
1	40784304	C	G	ENSG00000117013	1.094	urn:mavedb:00000094-a-2	KCNQ4
1	40784305	A	C	ENSG00000117013	1.4566	urn:mavedb:00000094-a-2	KCNQ4
1	40784305	A	G	ENSG00000117013	1.4034	urn:mavedb:00000094-a-2	KCNQ4
1	40784305	A	T	ENSG00000117013	0.8051	urn:mavedb:00000094-a-2	KCNQ4
1	40784306	G	C	ENSG00000117013	0.8893	urn:mavedb:00000094-a-2	KCNQ4
1	40784306	G	T	ENSG00000117013	0.8893	urn:mavedb:00000094-a-2	KCNQ4
1	40784307	C	A	ENSG00000117013	0.5032	urn:mavedb:00000094-a-2	KCNQ4
1	40784307	C	G	ENSG00000117013	0.7678	urn:mavedb:00000094-a-2	KCNQ4
1	40784307	C	T	ENSG00000117013	2.4991	urn:mavedb:00000094-a-2	KCNQ4
1	40784308	G	A	ENSG00000117013	0.7891	urn:mavedb:00000094-a-2	KCNQ4
1	40784308	G	C	ENSG00000117013	0.8609	urn:mavedb:00000094-a-2	KCNQ4
1	40784308	G	T	ENSG00000117013	1.199	urn:mavedb:00000094-a-2	KCNQ4
1	40784310	T	A	ENSG00000117013	1.0139	urn:mavedb:00000094-a-2	KCNQ4
1	40784310	T	C	ENSG00000117013	1.0616	urn:mavedb:00000094-a-2	KCNQ4
1	40784310	T	G	ENSG00000117013	0.992	urn:mavedb:00000094-a-2	KCNQ4
1	40784311	C	A	ENSG00000117013	1.0294	urn:mavedb:00000094-a-2	KCNQ4
1	40784311	C	G	ENSG00000117013	1.1902	urn:mavedb:00000094-a-2	KCNQ4
1	40784311	C	T	ENSG00000117013	1.1091	urn:mavedb:00000094-a-2	KCNQ4
1	40784313	T	A	ENSG00000117013	0.9265	urn:mavedb:00000094-a-2	KCNQ4
1	40784313	T	C	ENSG00000117013	1.1895	urn:mavedb:00000094-a-2	KCNQ4
1	40784313	T	G	ENSG00000117013	1.0213	urn:mavedb:00000094-a-2	KCNQ4
1	40784314	C	G	ENSG00000117013	1.1075	urn:mavedb:00000094-a-2	KCNQ4
1	40784314	C	T	ENSG00000117013	1.6129	urn:mavedb:00000094-a-2	KCNQ4
1	40784316	G	A	ENSG00000117013	1.2841	urn:mavedb:00000094-a-2	KCNQ4
1	40784316	G	C	ENSG00000117013	1.2811	urn:mavedb:00000094-a-2	KCNQ4
1	40784316	G	T	ENSG00000117013	1.2369	urn:mavedb:00000094-a-2	KCNQ4
1	40784317	C	A	ENSG00000117013	1.235	urn:mavedb:00000094-a-2	KCNQ4
1	40784317	C	G	ENSG00000117013	1.204	urn:mavedb:00000094-a-2	KCNQ4
1	40784317	C	T	ENSG00000117013	1.0728	urn:mavedb:00000094-a-2	KCNQ4
1	40784319	G	A	ENSG00000117013	1.1516	urn:mavedb:00000094-a-2	KCNQ4
1	40784319	G	C	ENSG00000117013	1.1189	urn:mavedb:00000094-a-2	KCNQ4
1	40784319	G	T	ENSG00000117013	0.8539	urn:mavedb:00000094-a-2	KCNQ4
1	40784320	C	A	ENSG00000117013	1.1611	urn:mavedb:00000094-a-2	KCNQ4
1	40784320	C	G	ENSG00000117013	0.9397	urn:mavedb:00000094-a-2	KCNQ4
1	40784320	C	T	ENSG00000117013	1.1742	urn:mavedb:00000094-a-2	KCNQ4
1	40784322	C	A	ENSG00000117013	1.1669	urn:mavedb:00000094-a-2	KCNQ4
1	40784322	C	G	ENSG00000117013	1.3342	urn:mavedb:00000094-a-2	KCNQ4
1	40784322	C	T	ENSG00000117013	0.8007	urn:mavedb:00000094-a-2	KCNQ4
1	40784323	A	C	ENSG00000117013	0.8737	urn:mavedb:00000094-a-2	KCNQ4
1	40784323	A	G	ENSG00000117013	0.817	urn:mavedb:00000094-a-2	KCNQ4
1	40784323	A	T	ENSG00000117013	1.0636	urn:mavedb:00000094-a-2	KCNQ4
1	40784324	C	A	ENSG00000117013	0.8712	urn:mavedb:00000094-a-2	KCNQ4
1	40784324	C	G	ENSG00000117013	0.8712	urn:mavedb:00000094-a-2	KCNQ4
1	40784325	A	C	ENSG00000117013	1.0675	urn:mavedb:00000094-a-2	KCNQ4
1	40784325	A	G	ENSG00000117013	3.4974	urn:mavedb:00000094-a-2	KCNQ4
1	40784326	A	C	ENSG00000117013	1.1417	urn:mavedb:00000094-a-2	KCNQ4
1	40784326	A	G	ENSG00000117013	1.0727	urn:mavedb:00000094-a-2	KCNQ4
1	40784326	A	T	ENSG00000117013	0.8664	urn:mavedb:00000094-a-2	KCNQ4
1	40784327	G	C	ENSG00000117013	1.4026	urn:mavedb:00000094-a-2	KCNQ4
1	40784327	G	T	ENSG00000117013	1.4026	urn:mavedb:00000094-a-2	KCNQ4
1	40784328	C	A	ENSG00000117013	1.0853	urn:mavedb:00000094-a-2	KCNQ4
1	40784328	C	G	ENSG00000117013	1.2729	urn:mavedb:00000094-a-2	KCNQ4
1	40784328	C	T	ENSG00000117013	0.8151	urn:mavedb:00000094-a-2	KCNQ4
1	40784329	G	A	ENSG00000117013	1.1091	urn:mavedb:00000094-a-2	KCNQ4
1	40784329	G	C	ENSG00000117013	1.0031	urn:mavedb:00000094-a-2	KCNQ4
1	40784329	G	T	ENSG00000117013	0.945	urn:mavedb:00000094-a-2	KCNQ4
1	40784331	T	A	ENSG00000117013	0.3634	urn:mavedb:00000094-a-2	KCNQ4
1	40784331	T	C	ENSG00000117013	0.7664	urn:mavedb:00000094-a-2	KCNQ4
1	40784331	T	G	ENSG00000117013	1.0709	urn:mavedb:00000094-a-2	KCNQ4
1	40784332	A	C	ENSG00000117013	1.1409	urn:mavedb:00000094-a-2	KCNQ4
1	40784332	A	G	ENSG00000117013	0.8301	urn:mavedb:00000094-a-2	KCNQ4
1	40784332	A	T	ENSG00000117013	0.9961	urn:mavedb:00000094-a-2	KCNQ4
1	40784334	C	A	ENSG00000117013	1.3419	urn:mavedb:00000094-a-2	KCNQ4
1	40784334	C	G	ENSG00000117013	1.1758	urn:mavedb:00000094-a-2	KCNQ4
1	40784334	C	T	ENSG00000117013	0.9665	urn:mavedb:00000094-a-2	KCNQ4
1	40784335	G	A	ENSG00000117013	0.9011	urn:mavedb:00000094-a-2	KCNQ4
1	40784335	G	C	ENSG00000117013	1.2334	urn:mavedb:00000094-a-2	KCNQ4
1	40784335	G	T	ENSG00000117013	1.4176	urn:mavedb:00000094-a-2	KCNQ4
1	40784337	C	A	ENSG00000117013	0.8374	urn:mavedb:00000094-a-2	KCNQ4
1	40784337	C	G	ENSG00000117013	1.0471	urn:mavedb:00000094-a-2	KCNQ4
1	40784337	C	T	ENSG00000117013	0.8255	urn:mavedb:00000094-a-2	KCNQ4
1	40784338	G	A	ENSG00000117013	0.896	urn:mavedb:00000094-a-2	KCNQ4
1	40784338	G	C	ENSG00000117013	1.0978	urn:mavedb:00000094-a-2	KCNQ4
1	40784338	G	T	ENSG00000117013	0.2883	urn:mavedb:00000094-a-2	KCNQ4
1	40784340	C	A	ENSG00000117013	1.2838	urn:mavedb:00000094-a-2	KCNQ4
1	40784340	C	G	ENSG00000117013	0.9993	urn:mavedb:00000094-a-2	KCNQ4
1	40784341	T	A	ENSG00000117013	0.4625	urn:mavedb:00000094-a-2	KCNQ4
1	40784341	T	C	ENSG00000117013	0.8547	urn:mavedb:00000094-a-2	KCNQ4
1	40784341	T	G	ENSG00000117013	0.1597	urn:mavedb:00000094-a-2	KCNQ4
1	40784343	C	A	ENSG00000117013	0.1001	urn:mavedb:00000094-a-2	KCNQ4
1	40784343	C	G	ENSG00000117013	0.849	urn:mavedb:00000094-a-2	KCNQ4
1	40784344	A	C	ENSG00000117013	0.0122	urn:mavedb:00000094-a-2	KCNQ4
1	40784344	A	G	ENSG00000117013	0.9904	urn:mavedb:00000094-a-2	KCNQ4
1	40784344	A	T	ENSG00000117013	0.0711	urn:mavedb:00000094-a-2	KCNQ4
1	40784345	G	C	ENSG00000117013	0.0343	urn:mavedb:00000094-a-2	KCNQ4
1	40784345	G	T	ENSG00000117013	0.0343	urn:mavedb:00000094-a-2	KCNQ4
1	40784346	A	C	ENSG00000117013	1.5274	urn:mavedb:00000094-a-2	KCNQ4
1	40784346	A	G	ENSG00000117013	4.6353	urn:mavedb:00000094-a-2	KCNQ4
1	40784346	A	T	ENSG00000117013	3.0405	urn:mavedb:00000094-a-2	KCNQ4
1	40784347	A	C	ENSG00000117013	2.3561	urn:mavedb:00000094-a-2	KCNQ4
1	40784347	A	G	ENSG00000117013	1.4055	urn:mavedb:00000094-a-2	KCNQ4
1	40784347	A	T	ENSG00000117013	1.0393	urn:mavedb:00000094-a-2	KCNQ4
1	40784348	C	A	ENSG00000117013	0.998	urn:mavedb:00000094-a-2	KCNQ4
1	40784348	C	G	ENSG00000117013	0.998	urn:mavedb:00000094-a-2	KCNQ4
1	40784349	T	A	ENSG00000117013	0.4824	urn:mavedb:00000094-a-2	KCNQ4
1	40784349	T	C	ENSG00000117013	0.4824	urn:mavedb:00000094-a-2	KCNQ4
1	40784349	T	G	ENSG00000117013	0.7639	urn:mavedb:00000094-a-2	KCNQ4
1	40784350	G	C	ENSG00000117013	0.8073	urn:mavedb:00000094-a-2	KCNQ4
1	40784350	G	T	ENSG00000117013	0.881	urn:mavedb:00000094-a-2	KCNQ4
1	40784351	G	C	ENSG00000117013	1.3425	urn:mavedb:00000094-a-2	KCNQ4
1	40784351	G	T	ENSG00000117013	1.3425	urn:mavedb:00000094-a-2	KCNQ4
1	40784352	G	A	ENSG00000117013	1.1055	urn:mavedb:00000094-a-2	KCNQ4
1	40784352	G	C	ENSG00000117013	0.9217	urn:mavedb:00000094-a-2	KCNQ4
1	40784352	G	T	ENSG00000117013	1.116	urn:mavedb:00000094-a-2	KCNQ4
1	40784353	T	A	ENSG00000117013	0.0008	urn:mavedb:00000094-a-2	KCNQ4
1	40784353	T	C	ENSG00000117013	1.1438	urn:mavedb:00000094-a-2	KCNQ4
1	40784353	T	G	ENSG00000117013	1.0072	urn:mavedb:00000094-a-2	KCNQ4
1	40784355	T	A	ENSG00000117013	1.2793	urn:mavedb:00000094-a-2	KCNQ4
1	40784355	T	C	ENSG00000117013	0.87	urn:mavedb:00000094-a-2	KCNQ4
1	40784355	T	G	ENSG00000117013	-0.0017	urn:mavedb:00000094-a-2	KCNQ4
1	40784356	A	C	ENSG00000117013	0.1316	urn:mavedb:00000094-a-2	KCNQ4
1	40784356	A	G	ENSG00000117013	0.0594	urn:mavedb:00000094-a-2	KCNQ4
1	40784356	A	T	ENSG00000117013	0.9215	urn:mavedb:00000094-a-2	KCNQ4
1	40784358	A	C	ENSG00000117013	1.0707	urn:mavedb:00000094-a-2	KCNQ4
1	40784358	A	G	ENSG00000117013	2.3655	urn:mavedb:00000094-a-2	KCNQ4
1	40784358	A	T	ENSG00000117013	1.9547	urn:mavedb:00000094-a-2	KCNQ4
1	40784359	A	C	ENSG00000117013	1.9135	urn:mavedb:00000094-a-2	KCNQ4
1	40784359	A	G	ENSG00000117013	1.2519	urn:mavedb:00000094-a-2	KCNQ4
1	40784359	A	T	ENSG00000117013	1.6112	urn:mavedb:00000094-a-2	KCNQ4
1	40784360	C	A	ENSG00000117013	1.1983	urn:mavedb:00000094-a-2	KCNQ4
1	40784360	C	G	ENSG00000117013	1.1983	urn:mavedb:00000094-a-2	KCNQ4
1	40784361	G	A	ENSG00000117013	1.5937	urn:mavedb:00000094-a-2	KCNQ4
1	40784361	G	C	ENSG00000117013	0.37	urn:mavedb:00000094-a-2	KCNQ4
1	40784361	G	T	ENSG00000117013	0.37	urn:mavedb:00000094-a-2	KCNQ4
1	40784362	T	A	ENSG00000117013	0.6635	urn:mavedb:00000094-a-2	KCNQ4
1	40784362	T	C	ENSG00000117013	2.4592	urn:mavedb:00000094-a-2	KCNQ4
1	40784362	T	G	ENSG00000117013	2.4338	urn:mavedb:00000094-a-2	KCNQ4
1	40784364	C	A	ENSG00000117013	1.1486	urn:mavedb:00000094-a-2	KCNQ4
1	40784364	C	G	ENSG00000117013	1.0476	urn:mavedb:00000094-a-2	KCNQ4
1	40784365	T	A	ENSG00000117013	0.0772	urn:mavedb:00000094-a-2	KCNQ4
1	40784365	T	C	ENSG00000117013	-0.013	urn:mavedb:00000094-a-2	KCNQ4
1	40784365	T	G	ENSG00000117013	0.0392	urn:mavedb:00000094-a-2	KCNQ4
1	40784367	G	A	ENSG00000117013	0.02	urn:mavedb:00000094-a-2	KCNQ4
1	40784367	G	C	ENSG00000117013	0.9612	urn:mavedb:00000094-a-2	KCNQ4
1	40784368	A	C	ENSG00000117013	0.0179	urn:mavedb:00000094-a-2	KCNQ4
1	40784368	A	G	ENSG00000117013	-0.0286	urn:mavedb:00000094-a-2	KCNQ4
1	40784368	A	T	ENSG00000117013	0.3104	urn:mavedb:00000094-a-2	KCNQ4
1	40784369	G	C	ENSG00000117013	0.7332	urn:mavedb:00000094-a-2	KCNQ4
1	40784369	G	T	ENSG00000117013	0.7332	urn:mavedb:00000094-a-2	KCNQ4
1	40784370	C	G	ENSG00000117013	1.1595	urn:mavedb:00000094-a-2	KCNQ4
1	40784370	C	T	ENSG00000117013	1.2906	urn:mavedb:00000094-a-2	KCNQ4
1	40784371	G	A	ENSG00000117013	4.147	urn:mavedb:00000094-a-2	KCNQ4
1	40784371	G	C	ENSG00000117013	0.0025	urn:mavedb:00000094-a-2	KCNQ4
1	40784371	G	T	ENSG00000117013	3.0161	urn:mavedb:00000094-a-2	KCNQ4
1	40784373	C	A	ENSG00000117013	0.0737	urn:mavedb:00000094-a-2	KCNQ4
1	40784373	C	G	ENSG00000117013	0.1976	urn:mavedb:00000094-a-2	KCNQ4
1	40784373	C	T	ENSG00000117013	0.2509	urn:mavedb:00000094-a-2	KCNQ4
1	40784374	C	A	ENSG00000117013	0.0927	urn:mavedb:00000094-a-2	KCNQ4
1	40784374	C	G	ENSG00000117013	-0.0049	urn:mavedb:00000094-a-2	KCNQ4
1	40784374	C	T	ENSG00000117013	-0.0129	urn:mavedb:00000094-a-2	KCNQ4
1	40784376	C	A	ENSG00000117013	1.2028	urn:mavedb:00000094-a-2	KCNQ4
1	40784376	C	G	ENSG00000117013	0.6998	urn:mavedb:00000094-a-2	KCNQ4
1	40784376	C	T	ENSG00000117013	1.0198	urn:mavedb:00000094-a-2	KCNQ4
1	40784377	G	A	ENSG00000117013	1.3866	urn:mavedb:00000094-a-2	KCNQ4
1	40784377	G	C	ENSG00000117013	0.0542	urn:mavedb:00000094-a-2	KCNQ4
1	40784377	G	T	ENSG00000117013	0.1674	urn:mavedb:00000094-a-2	KCNQ4
1	40784379	G	A	ENSG00000117013	1.2444	urn:mavedb:00000094-a-2	KCNQ4
1	40784379	G	C	ENSG00000117013	1.48	urn:mavedb:00000094-a-2	KCNQ4
1	40784379	G	T	ENSG00000117013	0.0224	urn:mavedb:00000094-a-2	KCNQ4
1	40784380	G	A	ENSG00000117013	1.4716	urn:mavedb:00000094-a-2	KCNQ4
1	40784380	G	C	ENSG00000117013	1.1176	urn:mavedb:00000094-a-2	KCNQ4
1	40784380	G	T	ENSG00000117013	0.2433	urn:mavedb:00000094-a-2	KCNQ4
1	40784382	T	A	ENSG00000117013	1.273	urn:mavedb:00000094-a-2	KCNQ4
1	40784382	T	C	ENSG00000117013	1.273	urn:mavedb:00000094-a-2	KCNQ4
1	40784382	T	G	ENSG00000117013	0.8773	urn:mavedb:00000094-a-2	KCNQ4
1	40784383	G	C	ENSG00000117013	1.3492	urn:mavedb:00000094-a-2	KCNQ4
1	40784383	G	T	ENSG00000117013	1.3451	urn:mavedb:00000094-a-2	KCNQ4
1	40784384	G	C	ENSG00000117013	1.5526	urn:mavedb:00000094-a-2	KCNQ4
1	40784384	G	T	ENSG00000117013	1.5526	urn:mavedb:00000094-a-2	KCNQ4
1	40784385	G	A	ENSG00000117013	0.7636	urn:mavedb:00000094-a-2	KCNQ4
1	40784385	G	C	ENSG00000117013	0.8188	urn:mavedb:00000094-a-2	KCNQ4
1	40784385	G	T	ENSG00000117013	0.6806	urn:mavedb:00000094-a-2	KCNQ4
1	40784386	C	A	ENSG00000117013	1.1166	urn:mavedb:00000094-a-2	KCNQ4
1	40784386	C	G	ENSG00000117013	0.6643	urn:mavedb:00000094-a-2	KCNQ4
1	40784386	C	T	ENSG00000117013	0.7631	urn:mavedb:00000094-a-2	KCNQ4
1	40784388	T	A	ENSG00000117013	0.7568	urn:mavedb:00000094-a-2	KCNQ4
1	40784388	T	C	ENSG00000117013	1.0001	urn:mavedb:00000094-a-2	KCNQ4
1	40784388	T	G	ENSG00000117013	0.9578	urn:mavedb:00000094-a-2	KCNQ4
1	40784389	T	A	ENSG00000117013	1.0404	urn:mavedb:00000094-a-2	KCNQ4
1	40784389	T	C	ENSG00000117013	1.0434	urn:mavedb:00000094-a-2	KCNQ4
1	40784389	T	G	ENSG00000117013	1.1135	urn:mavedb:00000094-a-2	KCNQ4
1	40784390	C	A	ENSG00000117013	1.0001	urn:mavedb:00000094-a-2	KCNQ4
1	40784390	C	G	ENSG00000117013	1.0001	urn:mavedb:00000094-a-2	KCNQ4
1	40784391	G	A	ENSG00000117013	0.939	urn:mavedb:00000094-a-2	KCNQ4
1	40784391	G	C	ENSG00000117013	0.7282	urn:mavedb:00000094-a-2	KCNQ4
1	40784391	G	T	ENSG00000117013	-0.0635	urn:mavedb:00000094-a-2	KCNQ4
1	40784392	T	A	ENSG00000117013	0.0092	urn:mavedb:00000094-a-2	KCNQ4
1	40784392	T	C	ENSG00000117013	1.0222	urn:mavedb:00000094-a-2	KCNQ4
1	40784392	T	G	ENSG00000117013	1.0459	urn:mavedb:00000094-a-2	KCNQ4
1	40784394	T	A	ENSG00000117013	-0.0209	urn:mavedb:00000094-a-2	KCNQ4
1	40784394	T	C	ENSG00000117013	0.6309	urn:mavedb:00000094-a-2	KCNQ4
1	40784394	T	G	ENSG00000117013	0.0088	urn:mavedb:00000094-a-2	KCNQ4
1	40784395	A	C	ENSG00000117013	-0.0027	urn:mavedb:00000094-a-2	KCNQ4
1	40784395	A	G	ENSG00000117013	0.0507	urn:mavedb:00000094-a-2	KCNQ4
1	40784395	A	T	ENSG00000117013	0.8589	urn:mavedb:00000094-a-2	KCNQ4
1	40784397	C	A	ENSG00000117013	0.9262	urn:mavedb:00000094-a-2	KCNQ4
1	40784397	C	G	ENSG00000117013	0.0672	urn:mavedb:00000094-a-2	KCNQ4
1	40784397	C	T	ENSG00000117013	1.4179	urn:mavedb:00000094-a-2	KCNQ4
1	40784398	A	C	ENSG00000117013	0.7599	urn:mavedb:00000094-a-2	KCNQ4
1	40784398	A	G	ENSG00000117013	0.3161	urn:mavedb:00000094-a-2	KCNQ4
1	40784398	A	T	ENSG00000117013	0.0953	urn:mavedb:00000094-a-2	KCNQ4
1	40784399	C	A	ENSG00000117013	0.9323	urn:mavedb:00000094-a-2	KCNQ4
1	40784399	C	G	ENSG00000117013	0.9323	urn:mavedb:00000094-a-2	KCNQ4
1	40784400	G	A	ENSG00000117013	0.9907	urn:mavedb:00000094-a-2	KCNQ4
1	40784400	G	C	ENSG00000117013	0.2798	urn:mavedb:00000094-a-2	KCNQ4
1	40784400	G	T	ENSG00000117013	0.7714	urn:mavedb:00000094-a-2	KCNQ4
1	40784401	T	A	ENSG00000117013	-0.0243	urn:mavedb:00000094-a-2	KCNQ4
1	40784401	T	C	ENSG00000117013	0.8819	urn:mavedb:00000094-a-2	KCNQ4
1	40784401	T	G	ENSG00000117013	0.9458	urn:mavedb:00000094-a-2	KCNQ4
1	40784403	T	A	ENSG00000117013	0.8645	urn:mavedb:00000094-a-2	KCNQ4
1	40784403	T	C	ENSG00000117013	0.6877	urn:mavedb:00000094-a-2	KCNQ4
1	40784403	T	G	ENSG00000117013	1.3263	urn:mavedb:00000094-a-2	KCNQ4
1	40784404	T	A	ENSG00000117013	0.7425	urn:mavedb:00000094-a-2	KCNQ4
1	40784404	T	C	ENSG00000117013	0.0315	urn:mavedb:00000094-a-2	KCNQ4
1	40784404	T	G	ENSG00000117013	1.0092	urn:mavedb:00000094-a-2	KCNQ4
1	40784405	C	A	ENSG00000117013	0.6877	urn:mavedb:00000094-a-2	KCNQ4
1	40784405	C	G	ENSG00000117013	0.6877	urn:mavedb:00000094-a-2	KCNQ4
1	40784406	A	C	ENSG00000117013	0.8548	urn:mavedb:00000094-a-2	KCNQ4
1	40784406	A	G	ENSG00000117013	1.1251	urn:mavedb:00000094-a-2	KCNQ4
1	40784406	A	T	ENSG00000117013	0.8548	urn:mavedb:00000094-a-2	KCNQ4
1	40784407	T	A	ENSG00000117013	-0.0043	urn:mavedb:00000094-a-2	KCNQ4
1	40784407	T	C	ENSG00000117013	0.8003	urn:mavedb:00000094-a-2	KCNQ4
1	40784407	T	G	ENSG00000117013	-0.1304	urn:mavedb:00000094-a-2	KCNQ4
1	40817265	A	G	ENSG00000117013	0.7888	urn:mavedb:00000094-a-2	KCNQ4
1	40817266	T	A	ENSG00000117013	0.6558	urn:mavedb:00000094-a-2	KCNQ4
1	40817266	T	C	ENSG00000117013	0.9491	urn:mavedb:00000094-a-2	KCNQ4
1	40817266	T	G	ENSG00000117013	1.0135	urn:mavedb:00000094-a-2	KCNQ4
1	40817267	T	A	ENSG00000117013	0.902	urn:mavedb:00000094-a-2	KCNQ4
1	40817267	T	C	ENSG00000117013	0.8783	urn:mavedb:00000094-a-2	KCNQ4
1	40817267	T	G	ENSG00000117013	1.0254	urn:mavedb:00000094-a-2	KCNQ4
1	40817268	T	A	ENSG00000117013	0.9491	urn:mavedb:00000094-a-2	KCNQ4
1	40817268	T	G	ENSG00000117013	0.9491	urn:mavedb:00000094-a-2	KCNQ4
1	40817269	T	A	ENSG00000117013	0.8223	urn:mavedb:00000094-a-2	KCNQ4
1	40817269	T	G	ENSG00000117013	0.7551	urn:mavedb:00000094-a-2	KCNQ4
1	40817270	T	C	ENSG00000117013	0.0036	urn:mavedb:00000094-a-2	KCNQ4
1	40817270	T	G	ENSG00000117013	0.3541	urn:mavedb:00000094-a-2	KCNQ4
1	40817271	G	C	ENSG00000117013	0.6421	urn:mavedb:00000094-a-2	KCNQ4
1	40817271	G	T	ENSG00000117013	0.6421	urn:mavedb:00000094-a-2	KCNQ4
1	40817272	C	A	ENSG00000117013	0.8904	urn:mavedb:00000094-a-2	KCNQ4
1	40817272	C	G	ENSG00000117013	0.8552	urn:mavedb:00000094-a-2	KCNQ4
1	40817273	T	A	ENSG00000117013	0.6962	urn:mavedb:00000094-a-2	KCNQ4
1	40817273	T	C	ENSG00000117013	0.8131	urn:mavedb:00000094-a-2	KCNQ4
1	40817273	T	G	ENSG00000117013	-0.0057	urn:mavedb:00000094-a-2	KCNQ4
1	40817275	G	A	ENSG00000117013	1.6829	urn:mavedb:00000094-a-2	KCNQ4
1	40817275	G	C	ENSG00000117013	0.7467	urn:mavedb:00000094-a-2	KCNQ4
1	40817275	G	T	ENSG00000117013	0.991	urn:mavedb:00000094-a-2	KCNQ4
1	40817276	T	A	ENSG00000117013	-0.0177	urn:mavedb:00000094-a-2	KCNQ4
1	40817276	T	C	ENSG00000117013	0.1534	urn:mavedb:00000094-a-2	KCNQ4
1	40817276	T	G	ENSG00000117013	0.1622	urn:mavedb:00000094-a-2	KCNQ4
1	40817278	T	A	ENSG00000117013	0.9828	urn:mavedb:00000094-a-2	KCNQ4
1	40817278	T	C	ENSG00000117013	0.2616	urn:mavedb:00000094-a-2	KCNQ4
1	40817278	T	G	ENSG00000117013	0.7619	urn:mavedb:00000094-a-2	KCNQ4
1	40817279	T	A	ENSG00000117013	0.8893	urn:mavedb:00000094-a-2	KCNQ4
1	40817279	T	C	ENSG00000117013	0.9439	urn:mavedb:00000094-a-2	KCNQ4
1	40817279	T	G	ENSG00000117013	0.8574	urn:mavedb:00000094-a-2	KCNQ4
1	40817280	C	A	ENSG00000117013	0.2616	urn:mavedb:00000094-a-2	KCNQ4
1	40817280	C	G	ENSG00000117013	0.2616	urn:mavedb:00000094-a-2	KCNQ4
1	40817281	A	C	ENSG00000117013	0.1042	urn:mavedb:00000094-a-2	KCNQ4
1	40817281	A	G	ENSG00000117013	0.7117	urn:mavedb:00000094-a-2	KCNQ4
1	40817281	A	T	ENSG00000117013	0.9084	urn:mavedb:00000094-a-2	KCNQ4
1	40817282	G	A	ENSG00000117013	0.6727	urn:mavedb:00000094-a-2	KCNQ4
1	40817282	G	C	ENSG00000117013	0.7315	urn:mavedb:00000094-a-2	KCNQ4
1	40817282	G	T	ENSG00000117013	0.7381	urn:mavedb:00000094-a-2	KCNQ4
1	40817283	C	A	ENSG00000117013	0.1042	urn:mavedb:00000094-a-2	KCNQ4
1	40817283	C	G	ENSG00000117013	0.1042	urn:mavedb:00000094-a-2	KCNQ4
1	40817284	T	A	ENSG00000117013	0.7026	urn:mavedb:00000094-a-2	KCNQ4
1	40817284	T	C	ENSG00000117013	0.6239	urn:mavedb:00000094-a-2	KCNQ4
1	40817284	T	G	ENSG00000117013	0.9176	urn:mavedb:00000094-a-2	KCNQ4
1	40817285	G	A	ENSG00000117013	0.8189	urn:mavedb:00000094-a-2	KCNQ4
1	40817285	G	C	ENSG00000117013	0.7026	urn:mavedb:00000094-a-2	KCNQ4
1	40817285	G	T	ENSG00000117013	0.5935	urn:mavedb:00000094-a-2	KCNQ4
1	40817286	C	G	ENSG00000117013	-0.0172	urn:mavedb:00000094-a-2	KCNQ4
1	40817287	C	A	ENSG00000117013	0.9416	urn:mavedb:00000094-a-2	KCNQ4
1	40817287	C	G	ENSG00000117013	0.8075	urn:mavedb:00000094-a-2	KCNQ4
1	40817288	T	A	ENSG00000117013	1.153	urn:mavedb:00000094-a-2	KCNQ4
1	40817288	T	C	ENSG00000117013	0.9202	urn:mavedb:00000094-a-2	KCNQ4
1	40817288	T	G	ENSG00000117013	1.1597	urn:mavedb:00000094-a-2	KCNQ4
1	40817290	G	A	ENSG00000117013	0.38	urn:mavedb:00000094-a-2	KCNQ4
1	40817290	G	C	ENSG00000117013	1.9671	urn:mavedb:00000094-a-2	KCNQ4
1	40817290	G	T	ENSG00000117013	1.9671	urn:mavedb:00000094-a-2	KCNQ4
1	40817291	T	A	ENSG00000117013	1.0848	urn:mavedb:00000094-a-2	KCNQ4
1	40817291	T	C	ENSG00000117013	2.7295	urn:mavedb:00000094-a-2	KCNQ4
1	40817291	T	G	ENSG00000117013	0.7917	urn:mavedb:00000094-a-2	KCNQ4
1	40817293	C	A	ENSG00000117013	1.1921	urn:mavedb:00000094-a-2	KCNQ4
1	40817293	C	G	ENSG00000117013	1.0917	urn:mavedb:00000094-a-2	KCNQ4
1	40817294	T	A	ENSG00000117013	1.0318	urn:mavedb:00000094-a-2	KCNQ4
1	40817294	T	C	ENSG00000117013	0.8066	urn:mavedb:00000094-a-2	KCNQ4
1	40817294	T	G	ENSG00000117013	1.0029	urn:mavedb:00000094-a-2	KCNQ4
1	40817296	T	A	ENSG00000117013	1.014	urn:mavedb:00000094-a-2	KCNQ4
1	40817296	T	C	ENSG00000117013	0.7406	urn:mavedb:00000094-a-2	KCNQ4
1	40817296	T	G	ENSG00000117013	0.8738	urn:mavedb:00000094-a-2	KCNQ4
1	40817297	C	A	ENSG00000117013	0.6848	urn:mavedb:00000094-a-2	KCNQ4
1	40817297	C	G	ENSG00000117013	0.7769	urn:mavedb:00000094-a-2	KCNQ4
1	40817297	C	T	ENSG00000117013	1.9119	urn:mavedb:00000094-a-2	KCNQ4
1	40817299	G	A	ENSG00000117013	1.1108	urn:mavedb:00000094-a-2	KCNQ4
1	40817299	G	C	ENSG00000117013	0.8615	urn:mavedb:00000094-a-2	KCNQ4
1	40817299	G	T	ENSG00000117013	0.8615	urn:mavedb:00000094-a-2	KCNQ4
1	40817300	T	A	ENSG00000117013	0.2383	urn:mavedb:00000094-a-2	KCNQ4
1	40817300	T	C	ENSG00000117013	1.1305	urn:mavedb:00000094-a-2	KCNQ4
1	40817300	T	G	ENSG00000117013	1.1322	urn:mavedb:00000094-a-2	KCNQ4
1	40817302	C	A	ENSG00000117013	1.1424	urn:mavedb:00000094-a-2	KCNQ4
1	40817302	C	G	ENSG00000117013	0.9046	urn:mavedb:00000094-a-2	KCNQ4
1	40817303	T	A	ENSG00000117013	0.8686	urn:mavedb:00000094-a-2	KCNQ4
1	40817303	T	C	ENSG00000117013	0.248	urn:mavedb:00000094-a-2	KCNQ4
1	40817303	T	G	ENSG00000117013	0.7331	urn:mavedb:00000094-a-2	KCNQ4
1	40817305	T	A	ENSG00000117013	0.7284	urn:mavedb:00000094-a-2	KCNQ4
1	40817305	T	C	ENSG00000117013	0.8771	urn:mavedb:00000094-a-2	KCNQ4
1	40817305	T	G	ENSG00000117013	0.9745	urn:mavedb:00000094-a-2	KCNQ4
1	40817306	C	A	ENSG00000117013	1.0934	urn:mavedb:00000094-a-2	KCNQ4
1	40817306	C	G	ENSG00000117013	0.1933	urn:mavedb:00000094-a-2	KCNQ4
1	40817306	C	T	ENSG00000117013	1.0635	urn:mavedb:00000094-a-2	KCNQ4
1	40817308	A	C	ENSG00000117013	0.9664	urn:mavedb:00000094-a-2	KCNQ4
1	40817308	A	G	ENSG00000117013	0.7527	urn:mavedb:00000094-a-2	KCNQ4
1	40817308	A	T	ENSG00000117013	1.1375	urn:mavedb:00000094-a-2	KCNQ4
1	40817309	C	A	ENSG00000117013	0.8643	urn:mavedb:00000094-a-2	KCNQ4
1	40817309	C	G	ENSG00000117013	1.1375	urn:mavedb:00000094-a-2	KCNQ4
1	40817309	C	T	ENSG00000117013	0.5864	urn:mavedb:00000094-a-2	KCNQ4
1	40817311	A	C	ENSG00000117013	0.962	urn:mavedb:00000094-a-2	KCNQ4
1	40817311	A	G	ENSG00000117013	0.8738	urn:mavedb:00000094-a-2	KCNQ4
1	40817311	A	T	ENSG00000117013	0.861	urn:mavedb:00000094-a-2	KCNQ4
1	40817312	T	A	ENSG00000117013	0.8935	urn:mavedb:00000094-a-2	KCNQ4
1	40817312	T	C	ENSG00000117013	0.9623	urn:mavedb:00000094-a-2	KCNQ4
1	40817312	T	G	ENSG00000117013	0.8222	urn:mavedb:00000094-a-2	KCNQ4
1	40817313	C	G	ENSG00000117013	1.2299	urn:mavedb:00000094-a-2	KCNQ4
1	40817314	C	A	ENSG00000117013	0.7135	urn:mavedb:00000094-a-2	KCNQ4
1	40817314	C	G	ENSG00000117013	0.915	urn:mavedb:00000094-a-2	KCNQ4
1	40817315	A	C	ENSG00000117013	0.9835	urn:mavedb:00000094-a-2	KCNQ4
1	40817315	A	G	ENSG00000117013	0.9467	urn:mavedb:00000094-a-2	KCNQ4
1	40817315	A	T	ENSG00000117013	0.0152	urn:mavedb:00000094-a-2	KCNQ4
1	40817316	G	C	ENSG00000117013	0.8139	urn:mavedb:00000094-a-2	KCNQ4
1	40817316	G	T	ENSG00000117013	0.8139	urn:mavedb:00000094-a-2	KCNQ4
1	40817317	G	A	ENSG00000117013	0.3329	urn:mavedb:00000094-a-2	KCNQ4
1	40817317	G	C	ENSG00000117013	1.0965	urn:mavedb:00000094-a-2	KCNQ4
1	40817318	A	C	ENSG00000117013	0.6176	urn:mavedb:00000094-a-2	KCNQ4
1	40817318	A	G	ENSG00000117013	0.8525	urn:mavedb:00000094-a-2	KCNQ4
1	40817318	A	T	ENSG00000117013	1.0705	urn:mavedb:00000094-a-2	KCNQ4
1	40817319	G	C	ENSG00000117013	0.8888	urn:mavedb:00000094-a-2	KCNQ4
1	40817319	G	T	ENSG00000117013	0.8888	urn:mavedb:00000094-a-2	KCNQ4
1	40817320	C	A	ENSG00000117013	0.6406	urn:mavedb:00000094-a-2	KCNQ4
1	40817320	C	G	ENSG00000117013	0.718	urn:mavedb:00000094-a-2	KCNQ4
1	40817320	C	T	ENSG00000117013	0.9562	urn:mavedb:00000094-a-2	KCNQ4
1	40817321	A	C	ENSG00000117013	1.133	urn:mavedb:00000094-a-2	KCNQ4
1	40817321	A	G	ENSG00000117013	0.813	urn:mavedb:00000094-a-2	KCNQ4
1	40817321	A	T	ENSG00000117013	0.891	urn:mavedb:00000094-a-2	KCNQ4
1	40817322	C	A	ENSG00000117013	0.93	urn:mavedb:00000094-a-2	KCNQ4
1	40817322	C	G	ENSG00000117013	0.93	urn:mavedb:00000094-a-2	KCNQ4
1	40817323	C	A	ENSG00000117013	0.7424	urn:mavedb:00000094-a-2	KCNQ4
1	40817323	C	G	ENSG00000117013	0.7888	urn:mavedb:00000094-a-2	KCNQ4
1	40817324	A	C	ENSG00000117013	0.7555	urn:mavedb:00000094-a-2	KCNQ4
1	40817324	A	G	ENSG00000117013	1.0745	urn:mavedb:00000094-a-2	KCNQ4
1	40817324	A	T	ENSG00000117013	0.8595	urn:mavedb:00000094-a-2	KCNQ4
1	40817325	G	C	ENSG00000117013	0.7764	urn:mavedb:00000094-a-2	KCNQ4
1	40817325	G	T	ENSG00000117013	0.7764	urn:mavedb:00000094-a-2	KCNQ4
1	40817326	G	A	ENSG00000117013	0.6065	urn:mavedb:00000094-a-2	KCNQ4
1	40817326	G	C	ENSG00000117013	1.0227	urn:mavedb:00000094-a-2	KCNQ4
1	40817327	A	C	ENSG00000117013	0.8387	urn:mavedb:00000094-a-2	KCNQ4
1	40817327	A	G	ENSG00000117013	0.7233	urn:mavedb:00000094-a-2	KCNQ4
1	40817327	A	T	ENSG00000117013	0.925	urn:mavedb:00000094-a-2	KCNQ4
1	40817328	A	C	ENSG00000117013	0.8157	urn:mavedb:00000094-a-2	KCNQ4
1	40817328	A	T	ENSG00000117013	0.8157	urn:mavedb:00000094-a-2	KCNQ4
1	40817329	C	A	ENSG00000117013	0.8335	urn:mavedb:00000094-a-2	KCNQ4
1	40817329	C	G	ENSG00000117013	0.6519	urn:mavedb:00000094-a-2	KCNQ4
1	40817329	C	T	ENSG00000117013	1.0076	urn:mavedb:00000094-a-2	KCNQ4
1	40817330	T	A	ENSG00000117013	1.0653	urn:mavedb:00000094-a-2	KCNQ4
1	40817330	T	C	ENSG00000117013	0.829	urn:mavedb:00000094-a-2	KCNQ4
1	40817330	T	G	ENSG00000117013	0.5799	urn:mavedb:00000094-a-2	KCNQ4
1	40817332	G	A	ENSG00000117013	1.0215	urn:mavedb:00000094-a-2	KCNQ4
1	40817332	G	C	ENSG00000117013	0.9564	urn:mavedb:00000094-a-2	KCNQ4
1	40817332	G	T	ENSG00000117013	0.6535	urn:mavedb:00000094-a-2	KCNQ4
1	40817333	C	A	ENSG00000117013	0.7991	urn:mavedb:00000094-a-2	KCNQ4
1	40817333	C	G	ENSG00000117013	1.003	urn:mavedb:00000094-a-2	KCNQ4
1	40817333	C	T	ENSG00000117013	0.7495	urn:mavedb:00000094-a-2	KCNQ4
1	40817335	A	C	ENSG00000117013	0.8936	urn:mavedb:00000094-a-2	KCNQ4
1	40817335	A	G	ENSG00000117013	1.0737	urn:mavedb:00000094-a-2	KCNQ4
1	40817335	A	T	ENSG00000117013	0.8225	urn:mavedb:00000094-a-2	KCNQ4
1	40817336	A	C	ENSG00000117013	0.975	urn:mavedb:00000094-a-2	KCNQ4
1	40817336	A	G	ENSG00000117013	0.03	urn:mavedb:00000094-a-2	KCNQ4
1	40817336	A	T	ENSG00000117013	0.9285	urn:mavedb:00000094-a-2	KCNQ4
1	40817337	C	A	ENSG00000117013	0.8551	urn:mavedb:00000094-a-2	KCNQ4
1	40817337	C	G	ENSG00000117013	0.8551	urn:mavedb:00000094-a-2	KCNQ4
1	40817338	G	A	ENSG00000117013	0.6415	urn:mavedb:00000094-a-2	KCNQ4
1	40817338	G	C	ENSG00000117013	1.1115	urn:mavedb:00000094-a-2	KCNQ4
1	40817339	A	C	ENSG00000117013	1.0664	urn:mavedb:00000094-a-2	KCNQ4
1	40817339	A	G	ENSG00000117013	1.0183	urn:mavedb:00000094-a-2	KCNQ4
1	40817339	A	T	ENSG00000117013	0.8302	urn:mavedb:00000094-a-2	KCNQ4
1	40817340	G	C	ENSG00000117013	0.8012	urn:mavedb:00000094-a-2	KCNQ4
1	40817340	G	T	ENSG00000117013	0.8012	urn:mavedb:00000094-a-2	KCNQ4
1	40817341	T	A	ENSG00000117013	0.8285	urn:mavedb:00000094-a-2	KCNQ4
1	40817341	T	C	ENSG00000117013	0.6116	urn:mavedb:00000094-a-2	KCNQ4
1	40817341	T	G	ENSG00000117013	0.6414	urn:mavedb:00000094-a-2	KCNQ4
1	40817342	G	A	ENSG00000117013	1.0431	urn:mavedb:00000094-a-2	KCNQ4
1	40817342	G	C	ENSG00000117013	0.8285	urn:mavedb:00000094-a-2	KCNQ4
1	40817342	G	T	ENSG00000117013	1.3027	urn:mavedb:00000094-a-2	KCNQ4
1	40817343	T	G	ENSG00000117013	0.9389	urn:mavedb:00000094-a-2	KCNQ4
1	40817344	C	A	ENSG00000117013	2.211	urn:mavedb:00000094-a-2	KCNQ4
1	40817344	C	G	ENSG00000117013	1.3031	urn:mavedb:00000094-a-2	KCNQ4
1	40817344	C	T	ENSG00000117013	1.6548	urn:mavedb:00000094-a-2	KCNQ4
1	40817345	T	A	ENSG00000117013	1.1638	urn:mavedb:00000094-a-2	KCNQ4
1	40817345	T	C	ENSG00000117013	0.4753	urn:mavedb:00000094-a-2	KCNQ4
1	40817345	T	G	ENSG00000117013	1.1614	urn:mavedb:00000094-a-2	KCNQ4
1	40817347	C	A	ENSG00000117013	0.869	urn:mavedb:00000094-a-2	KCNQ4
1	40817347	C	G	ENSG00000117013	1.214	urn:mavedb:00000094-a-2	KCNQ4
1	40817347	C	T	ENSG00000117013	0.6734	urn:mavedb:00000094-a-2	KCNQ4
1	40817348	T	A	ENSG00000117013	0.8125	urn:mavedb:00000094-a-2	KCNQ4
1	40817348	T	C	ENSG00000117013	0.8572	urn:mavedb:00000094-a-2	KCNQ4
1	40817348	T	G	ENSG00000117013	0.6559	urn:mavedb:00000094-a-2	KCNQ4
1	40817350	A	C	ENSG00000117013	1.0918	urn:mavedb:00000094-a-2	KCNQ4
1	40817350	A	G	ENSG00000117013	0.6563	urn:mavedb:00000094-a-2	KCNQ4
1	40817350	A	T	ENSG00000117013	1.1089	urn:mavedb:00000094-a-2	KCNQ4
1	40817351	T	A	ENSG00000117013	0.982	urn:mavedb:00000094-a-2	KCNQ4
1	40817351	T	C	ENSG00000117013	1.1401	urn:mavedb:00000094-a-2	KCNQ4
1	40817351	T	G	ENSG00000117013	0.7201	urn:mavedb:00000094-a-2	KCNQ4
1	40817352	C	G	ENSG00000117013	0.8627	urn:mavedb:00000094-a-2	KCNQ4
1	40817353	T	A	ENSG00000117013	0.9842	urn:mavedb:00000094-a-2	KCNQ4
1	40817353	T	G	ENSG00000117013	0.7424	urn:mavedb:00000094-a-2	KCNQ4
1	40817354	T	C	ENSG00000117013	0.8456	urn:mavedb:00000094-a-2	KCNQ4
1	40817354	T	G	ENSG00000117013	0.9557	urn:mavedb:00000094-a-2	KCNQ4
1	40817355	G	C	ENSG00000117013	1.4201	urn:mavedb:00000094-a-2	KCNQ4
1	40817355	G	T	ENSG00000117013	1.4201	urn:mavedb:00000094-a-2	KCNQ4
1	40818164	G	A	ENSG00000117013	0.4989	urn:mavedb:00000094-a-2	KCNQ4
1	40818164	G	C	ENSG00000117013	1.4181	urn:mavedb:00000094-a-2	KCNQ4
1	40818165	A	C	ENSG00000117013	1.2895	urn:mavedb:00000094-a-2	KCNQ4
1	40818165	A	G	ENSG00000117013	2.018	urn:mavedb:00000094-a-2	KCNQ4
1	40818165	A	T	ENSG00000117013	0.632	urn:mavedb:00000094-a-2	KCNQ4
1	40818166	A	C	ENSG00000117013	2.3903	urn:mavedb:00000094-a-2	KCNQ4
1	40818166	A	T	ENSG00000117013	2.3903	urn:mavedb:00000094-a-2	KCNQ4
1	40818167	T	A	ENSG00000117013	0.8139	urn:mavedb:00000094-a-2	KCNQ4
1	40818167	T	C	ENSG00000117013	1.2185	urn:mavedb:00000094-a-2	KCNQ4
1	40818167	T	G	ENSG00000117013	0.6371	urn:mavedb:00000094-a-2	KCNQ4
1	40818168	T	A	ENSG00000117013	0.7605	urn:mavedb:00000094-a-2	KCNQ4
1	40818168	T	C	ENSG00000117013	0.9734	urn:mavedb:00000094-a-2	KCNQ4
1	40818168	T	G	ENSG00000117013	1.0093	urn:mavedb:00000094-a-2	KCNQ4
1	40818169	C	A	ENSG00000117013	1.2185	urn:mavedb:00000094-a-2	KCNQ4
1	40818169	C	G	ENSG00000117013	1.2185	urn:mavedb:00000094-a-2	KCNQ4
1	40818170	G	A	ENSG00000117013	0.9912	urn:mavedb:00000094-a-2	KCNQ4
1	40818170	G	C	ENSG00000117013	1.2172	urn:mavedb:00000094-a-2	KCNQ4
1	40818170	G	T	ENSG00000117013	1.2172	urn:mavedb:00000094-a-2	KCNQ4
1	40818171	T	A	ENSG00000117013	0.0358	urn:mavedb:00000094-a-2	KCNQ4
1	40818171	T	C	ENSG00000117013	0.8214	urn:mavedb:00000094-a-2	KCNQ4
1	40818171	T	G	ENSG00000117013	1.1475	urn:mavedb:00000094-a-2	KCNQ4
1	40818173	A	C	ENSG00000117013	1.5272	urn:mavedb:00000094-a-2	KCNQ4
1	40818173	A	G	ENSG00000117013	1.4426	urn:mavedb:00000094-a-2	KCNQ4
1	40818173	A	T	ENSG00000117013	1.5272	urn:mavedb:00000094-a-2	KCNQ4
1	40818174	T	A	ENSG00000117013	0.0591	urn:mavedb:00000094-a-2	KCNQ4
1	40818174	T	C	ENSG00000117013	0.9681	urn:mavedb:00000094-a-2	KCNQ4
1	40818174	T	G	ENSG00000117013	0.8858	urn:mavedb:00000094-a-2	KCNQ4
1	40818175	G	A	ENSG00000117013	0.9045	urn:mavedb:00000094-a-2	KCNQ4
1	40818175	G	C	ENSG00000117013	0.9045	urn:mavedb:00000094-a-2	KCNQ4
1	40818175	G	T	ENSG00000117013	0.9045	urn:mavedb:00000094-a-2	KCNQ4
1	40818176	A	C	ENSG00000117013	0.8668	urn:mavedb:00000094-a-2	KCNQ4
1	40818176	A	G	ENSG00000117013	0.898	urn:mavedb:00000094-a-2	KCNQ4
1	40818176	A	T	ENSG00000117013	1.0277	urn:mavedb:00000094-a-2	KCNQ4
1	40818177	T	A	ENSG00000117013	0.3292	urn:mavedb:00000094-a-2	KCNQ4
1	40818177	T	C	ENSG00000117013	0.7525	urn:mavedb:00000094-a-2	KCNQ4
1	40818177	T	G	ENSG00000117013	1.1237	urn:mavedb:00000094-a-2	KCNQ4
1	40818178	C	G	ENSG00000117013	1.162	urn:mavedb:00000094-a-2	KCNQ4
1	40818179	G	A	ENSG00000117013	1.2432	urn:mavedb:00000094-a-2	KCNQ4
1	40818179	G	C	ENSG00000117013	1.0493	urn:mavedb:00000094-a-2	KCNQ4
1	40818179	G	T	ENSG00000117013	1.0493	urn:mavedb:00000094-a-2	KCNQ4
1	40818180	T	A	ENSG00000117013	0.3166	urn:mavedb:00000094-a-2	KCNQ4
1	40818180	T	C	ENSG00000117013	0.9969	urn:mavedb:00000094-a-2	KCNQ4
1	40818180	T	G	ENSG00000117013	1.6032	urn:mavedb:00000094-a-2	KCNQ4
1	40818182	G	A	ENSG00000117013	1.0781	urn:mavedb:00000094-a-2	KCNQ4
1	40818182	G	C	ENSG00000117013	1.2765	urn:mavedb:00000094-a-2	KCNQ4
1	40818182	G	T	ENSG00000117013	1.2548	urn:mavedb:00000094-a-2	KCNQ4
1	40818183	T	A	ENSG00000117013	0.0138	urn:mavedb:00000094-a-2	KCNQ4
1	40818183	T	C	ENSG00000117013	0.6291	urn:mavedb:00000094-a-2	KCNQ4
1	40818183	T	G	ENSG00000117013	1.1965	urn:mavedb:00000094-a-2	KCNQ4
1	40818185	T	A	ENSG00000117013	0.9756	urn:mavedb:00000094-a-2	KCNQ4
1	40818185	T	C	ENSG00000117013	1.1578	urn:mavedb:00000094-a-2	KCNQ4
1	40818185	T	G	ENSG00000117013	1.1457	urn:mavedb:00000094-a-2	KCNQ4
1	40818186	T	A	ENSG00000117013	0.9644	urn:mavedb:00000094-a-2	KCNQ4
1	40818186	T	C	ENSG00000117013	1.0965	urn:mavedb:00000094-a-2	KCNQ4
1	40818186	T	G	ENSG00000117013	0.779	urn:mavedb:00000094-a-2	KCNQ4
1	40818187	C	A	ENSG00000117013	1.1578	urn:mavedb:00000094-a-2	KCNQ4
1	40818187	C	G	ENSG00000117013	1.1578	urn:mavedb:00000094-a-2	KCNQ4
1	40818188	G	A	ENSG00000117013	0.8839	urn:mavedb:00000094-a-2	KCNQ4
1	40818188	G	C	ENSG00000117013	-0.007	urn:mavedb:00000094-a-2	KCNQ4
1	40818188	G	T	ENSG00000117013	0.916	urn:mavedb:00000094-a-2	KCNQ4
1	40818189	G	A	ENSG00000117013	0.551	urn:mavedb:00000094-a-2	KCNQ4
1	40818189	G	C	ENSG00000117013	1.1124	urn:mavedb:00000094-a-2	KCNQ4
1	40818189	G	T	ENSG00000117013	0.8981	urn:mavedb:00000094-a-2	KCNQ4
1	40818191	T	A	ENSG00000117013	0.757	urn:mavedb:00000094-a-2	KCNQ4
1	40818191	T	G	ENSG00000117013	1.0152	urn:mavedb:00000094-a-2	KCNQ4
1	40818192	T	C	ENSG00000117013	1.243	urn:mavedb:00000094-a-2	KCNQ4
1	40818192	T	G	ENSG00000117013	1.042	urn:mavedb:00000094-a-2	KCNQ4
1	40818193	G	C	ENSG00000117013	0.8503	urn:mavedb:00000094-a-2	KCNQ4
1	40818193	G	T	ENSG00000117013	0.8503	urn:mavedb:00000094-a-2	KCNQ4
1	40818194	G	A	ENSG00000117013	0.0298	urn:mavedb:00000094-a-2	KCNQ4
1	40818194	G	C	ENSG00000117013	0.0561	urn:mavedb:00000094-a-2	KCNQ4
1	40818195	A	C	ENSG00000117013	-0.0164	urn:mavedb:00000094-a-2	KCNQ4
1	40818195	A	G	ENSG00000117013	-0.0546	urn:mavedb:00000094-a-2	KCNQ4
1	40818195	A	T	ENSG00000117013	-0.0055	urn:mavedb:00000094-a-2	KCNQ4
1	40818196	G	C	ENSG00000117013	0.9007	urn:mavedb:00000094-a-2	KCNQ4
1	40818196	G	T	ENSG00000117013	0.9007	urn:mavedb:00000094-a-2	KCNQ4
1	40818197	T	A	ENSG00000117013	0.5642	urn:mavedb:00000094-a-2	KCNQ4
1	40818197	T	C	ENSG00000117013	0.2771	urn:mavedb:00000094-a-2	KCNQ4
1	40818197	T	G	ENSG00000117013	0.6562	urn:mavedb:00000094-a-2	KCNQ4
1	40818198	A	C	ENSG00000117013	0.4185	urn:mavedb:00000094-a-2	KCNQ4
1	40818198	A	G	ENSG00000117013	0.7451	urn:mavedb:00000094-a-2	KCNQ4
1	40818198	A	T	ENSG00000117013	1.2405	urn:mavedb:00000094-a-2	KCNQ4
1	40818200	A	C	ENSG00000117013	0.1229	urn:mavedb:00000094-a-2	KCNQ4
1	40818200	A	G	ENSG00000117013	1.1537	urn:mavedb:00000094-a-2	KCNQ4
1	40818200	A	T	ENSG00000117013	1.2149	urn:mavedb:00000094-a-2	KCNQ4
1	40818201	T	A	ENSG00000117013	0.339	urn:mavedb:00000094-a-2	KCNQ4
1	40818201	T	C	ENSG00000117013	1.0113	urn:mavedb:00000094-a-2	KCNQ4
1	40818201	T	G	ENSG00000117013	0.9704	urn:mavedb:00000094-a-2	KCNQ4
1	40818202	C	G	ENSG00000117013	0.8054	urn:mavedb:00000094-a-2	KCNQ4
1	40818203	G	A	ENSG00000117013	0.7347	urn:mavedb:00000094-a-2	KCNQ4
1	40818203	G	C	ENSG00000117013	1.4916	urn:mavedb:00000094-a-2	KCNQ4
1	40818203	G	T	ENSG00000117013	1.1296	urn:mavedb:00000094-a-2	KCNQ4
1	40818204	T	A	ENSG00000117013	-0.0308	urn:mavedb:00000094-a-2	KCNQ4
1	40818204	T	C	ENSG00000117013	1.8384	urn:mavedb:00000094-a-2	KCNQ4
1	40818204	T	G	ENSG00000117013	0.6199	urn:mavedb:00000094-a-2	KCNQ4
1	40818206	C	G	ENSG00000117013	0.0413	urn:mavedb:00000094-a-2	KCNQ4
1	40818206	C	T	ENSG00000117013	0.2795	urn:mavedb:00000094-a-2	KCNQ4
1	40818207	G	A	ENSG00000117013	0.0693	urn:mavedb:00000094-a-2	KCNQ4
1	40818207	G	C	ENSG00000117013	0.0088	urn:mavedb:00000094-a-2	KCNQ4
1	40818207	G	T	ENSG00000117013	1.1329	urn:mavedb:00000094-a-2	KCNQ4
1	40818209	G	A	ENSG00000117013	1.1545	urn:mavedb:00000094-a-2	KCNQ4
1	40818209	G	C	ENSG00000117013	1.0704	urn:mavedb:00000094-a-2	KCNQ4
1	40818209	G	T	ENSG00000117013	0.9383	urn:mavedb:00000094-a-2	KCNQ4
1	40818210	T	A	ENSG00000117013	-0.0071	urn:mavedb:00000094-a-2	KCNQ4
1	40818210	T	C	ENSG00000117013	0.3174	urn:mavedb:00000094-a-2	KCNQ4
1	40818210	T	G	ENSG00000117013	0.2226	urn:mavedb:00000094-a-2	KCNQ4
1	40818212	T	A	ENSG00000117013	-0.0025	urn:mavedb:00000094-a-2	KCNQ4
1	40818212	T	C	ENSG00000117013	-0.0025	urn:mavedb:00000094-a-2	KCNQ4
1	40818212	T	G	ENSG00000117013	0.0215	urn:mavedb:00000094-a-2	KCNQ4
1	40818213	G	C	ENSG00000117013	-0.0006	urn:mavedb:00000094-a-2	KCNQ4
1	40818213	G	T	ENSG00000117013	0.1071	urn:mavedb:00000094-a-2	KCNQ4
1	40818214	G	C	ENSG00000117013	-0.0479	urn:mavedb:00000094-a-2	KCNQ4
1	40818214	G	T	ENSG00000117013	-0.0479	urn:mavedb:00000094-a-2	KCNQ4
1	40818215	T	A	ENSG00000117013	0.209	urn:mavedb:00000094-a-2	KCNQ4
1	40818215	T	C	ENSG00000117013	-0.009	urn:mavedb:00000094-a-2	KCNQ4
1	40818215	T	G	ENSG00000117013	1.1863	urn:mavedb:00000094-a-2	KCNQ4
1	40818216	C	A	ENSG00000117013	-0.0053	urn:mavedb:00000094-a-2	KCNQ4
1	40818216	C	G	ENSG00000117013	0.9788	urn:mavedb:00000094-a-2	KCNQ4
1	40818216	C	T	ENSG00000117013	-0.0718	urn:mavedb:00000094-a-2	KCNQ4
1	40818218	G	A	ENSG00000117013	0.0782	urn:mavedb:00000094-a-2	KCNQ4
1	40818218	G	C	ENSG00000117013	-0.0017	urn:mavedb:00000094-a-2	KCNQ4
1	40818218	G	T	ENSG00000117013	1.1051	urn:mavedb:00000094-a-2	KCNQ4
1	40818219	C	A	ENSG00000117013	-0.0203	urn:mavedb:00000094-a-2	KCNQ4
1	40818219	C	G	ENSG00000117013	0.0454	urn:mavedb:00000094-a-2	KCNQ4
1	40818219	C	T	ENSG00000117013	1.4036	urn:mavedb:00000094-a-2	KCNQ4
1	40818221	G	A	ENSG00000117013	-0.0031	urn:mavedb:00000094-a-2	KCNQ4
1	40818221	G	C	ENSG00000117013	-0.0031	urn:mavedb:00000094-a-2	KCNQ4
1	40818222	G	A	ENSG00000117013	0.0806	urn:mavedb:00000094-a-2	KCNQ4
1	40818222	G	C	ENSG00000117013	0.6328	urn:mavedb:00000094-a-2	KCNQ4
1	40818222	G	T	ENSG00000117013	-0.0361	urn:mavedb:00000094-a-2	KCNQ4
1	40818224	T	A	ENSG00000117013	2.9549	urn:mavedb:00000094-a-2	KCNQ4
1	40818224	T	C	ENSG00000117013	0.8474	urn:mavedb:00000094-a-2	KCNQ4
1	40818224	T	G	ENSG00000117013	4.8439	urn:mavedb:00000094-a-2	KCNQ4
1	40818225	G	A	ENSG00000117013	1.6595	urn:mavedb:00000094-a-2	KCNQ4
1	40818225	G	C	ENSG00000117013	2.9549	urn:mavedb:00000094-a-2	KCNQ4
1	40818225	G	T	ENSG00000117013	0.9843	urn:mavedb:00000094-a-2	KCNQ4
1	40818226	C	G	ENSG00000117013	0.991	urn:mavedb:00000094-a-2	KCNQ4
1	40818227	T	A	ENSG00000117013	2.1388	urn:mavedb:00000094-a-2	KCNQ4
1	40818227	T	C	ENSG00000117013	0.968	urn:mavedb:00000094-a-2	KCNQ4
1	40818227	T	G	ENSG00000117013	1.808	urn:mavedb:00000094-a-2	KCNQ4
1	40818228	G	A	ENSG00000117013	1.4906	urn:mavedb:00000094-a-2	KCNQ4
1	40818228	G	C	ENSG00000117013	2.1388	urn:mavedb:00000094-a-2	KCNQ4
1	40818228	G	T	ENSG00000117013	2.0284	urn:mavedb:00000094-a-2	KCNQ4
1	40818229	C	G	ENSG00000117013	1.1992	urn:mavedb:00000094-a-2	KCNQ4
1	40818230	T	A	ENSG00000117013	0.8336	urn:mavedb:00000094-a-2	KCNQ4
1	40818230	T	C	ENSG00000117013	1.818	urn:mavedb:00000094-a-2	KCNQ4
1	40818230	T	G	ENSG00000117013	0.9264	urn:mavedb:00000094-a-2	KCNQ4
1	40818231	G	A	ENSG00000117013	1.8428	urn:mavedb:00000094-a-2	KCNQ4
1	40818231	G	C	ENSG00000117013	0.8336	urn:mavedb:00000094-a-2	KCNQ4
1	40818231	G	T	ENSG00000117013	3.2101	urn:mavedb:00000094-a-2	KCNQ4
1	40818232	C	G	ENSG00000117013	2.3774	urn:mavedb:00000094-a-2	KCNQ4
1	40818233	C	A	ENSG00000117013	3.4459	urn:mavedb:00000094-a-2	KCNQ4
1	40818233	C	G	ENSG00000117013	3.2029	urn:mavedb:00000094-a-2	KCNQ4
1	40818233	C	T	ENSG00000117013	1.1903	urn:mavedb:00000094-a-2	KCNQ4
1	40818234	G	A	ENSG00000117013	4.1132	urn:mavedb:00000094-a-2	KCNQ4
1	40818234	G	C	ENSG00000117013	3.8138	urn:mavedb:00000094-a-2	KCNQ4
1	40818234	G	T	ENSG00000117013	3.1186	urn:mavedb:00000094-a-2	KCNQ4
1	40818236	T	A	ENSG00000117013	0.0537	urn:mavedb:00000094-a-2	KCNQ4
1	40818236	T	C	ENSG00000117013	0.113	urn:mavedb:00000094-a-2	KCNQ4
1	40818236	T	G	ENSG00000117013	0.0059	urn:mavedb:00000094-a-2	KCNQ4
1	40818237	A	C	ENSG00000117013	-0.0104	urn:mavedb:00000094-a-2	KCNQ4
1	40818237	A	G	ENSG00000117013	-0.0306	urn:mavedb:00000094-a-2	KCNQ4
1	40818237	A	T	ENSG00000117013	0.6144	urn:mavedb:00000094-a-2	KCNQ4
1	40818239	C	G	ENSG00000117013	3.0011	urn:mavedb:00000094-a-2	KCNQ4
1	40818240	G	A	ENSG00000117013	1.3331	urn:mavedb:00000094-a-2	KCNQ4
1	40818240	G	C	ENSG00000117013	0.0864	urn:mavedb:00000094-a-2	KCNQ4
1	40818240	G	T	ENSG00000117013	0.7283	urn:mavedb:00000094-a-2	KCNQ4
1	40818242	G	A	ENSG00000117013	0.2014	urn:mavedb:00000094-a-2	KCNQ4
1	40818242	G	C	ENSG00000117013	0.2014	urn:mavedb:00000094-a-2	KCNQ4
1	40818243	G	A	ENSG00000117013	0.6678	urn:mavedb:00000094-a-2	KCNQ4
1	40818243	G	C	ENSG00000117013	0.7674	urn:mavedb:00000094-a-2	KCNQ4
1	40818243	G	T	ENSG00000117013	0.0026	urn:mavedb:00000094-a-2	KCNQ4
1	40818245	T	A	ENSG00000117013	0.6021	urn:mavedb:00000094-a-2	KCNQ4
1	40818245	T	C	ENSG00000117013	0.6021	urn:mavedb:00000094-a-2	KCNQ4
1	40818245	T	G	ENSG00000117013	0.1853	urn:mavedb:00000094-a-2	KCNQ4
1	40818246	G	C	ENSG00000117013	0.1886	urn:mavedb:00000094-a-2	KCNQ4
1	40818246	G	T	ENSG00000117013	0.9486	urn:mavedb:00000094-a-2	KCNQ4
1	40818247	G	C	ENSG00000117013	0.7993	urn:mavedb:00000094-a-2	KCNQ4
1	40818247	G	T	ENSG00000117013	0.7993	urn:mavedb:00000094-a-2	KCNQ4
1	40818248	C	A	ENSG00000117013	0.7166	urn:mavedb:00000094-a-2	KCNQ4
1	40818248	C	G	ENSG00000117013	0.7681	urn:mavedb:00000094-a-2	KCNQ4
1	40818249	A	C	ENSG00000117013	0.8466	urn:mavedb:00000094-a-2	KCNQ4
1	40818249	A	G	ENSG00000117013	0.8837	urn:mavedb:00000094-a-2	KCNQ4
1	40818249	A	T	ENSG00000117013	0.7184	urn:mavedb:00000094-a-2	KCNQ4
1	40818250	G	C	ENSG00000117013	0.7827	urn:mavedb:00000094-a-2	KCNQ4
1	40818250	G	T	ENSG00000117013	0.7827	urn:mavedb:00000094-a-2	KCNQ4
1	40818251	G	A	ENSG00000117013	-0.0107	urn:mavedb:00000094-a-2	KCNQ4
1	40818251	G	C	ENSG00000117013	-0.0017	urn:mavedb:00000094-a-2	KCNQ4
1	40818251	G	T	ENSG00000117013	-0.021	urn:mavedb:00000094-a-2	KCNQ4
1	40818252	G	A	ENSG00000117013	-0.0097	urn:mavedb:00000094-a-2	KCNQ4
1	40818252	G	C	ENSG00000117013	0.0987	urn:mavedb:00000094-a-2	KCNQ4
1	40818252	G	T	ENSG00000117013	-0.0047	urn:mavedb:00000094-a-2	KCNQ4
1	40818254	C	A	ENSG00000117013	0.8615	urn:mavedb:00000094-a-2	KCNQ4
1	40818254	C	G	ENSG00000117013	0.2842	urn:mavedb:00000094-a-2	KCNQ4
1	40818254	C	T	ENSG00000117013	1.088	urn:mavedb:00000094-a-2	KCNQ4
1	40818255	G	A	ENSG00000117013	0.8688	urn:mavedb:00000094-a-2	KCNQ4
1	40818255	G	C	ENSG00000117013	0.0267	urn:mavedb:00000094-a-2	KCNQ4
1	40818255	G	T	ENSG00000117013	1.7328	urn:mavedb:00000094-a-2	KCNQ4
1	40818257	T	A	ENSG00000117013	0.7154	urn:mavedb:00000094-a-2	KCNQ4
1	40818257	T	C	ENSG00000117013	0.9762	urn:mavedb:00000094-a-2	KCNQ4
1	40818257	T	G	ENSG00000117013	1.1724	urn:mavedb:00000094-a-2	KCNQ4
1	40818258	T	A	ENSG00000117013	1.0128	urn:mavedb:00000094-a-2	KCNQ4
1	40818258	T	C	ENSG00000117013	0.7036	urn:mavedb:00000094-a-2	KCNQ4
1	40818258	T	G	ENSG00000117013	1.0012	urn:mavedb:00000094-a-2	KCNQ4
1	40818259	C	A	ENSG00000117013	0.9762	urn:mavedb:00000094-a-2	KCNQ4
1	40818259	C	G	ENSG00000117013	0.9762	urn:mavedb:00000094-a-2	KCNQ4
1	40818260	C	A	ENSG00000117013	1.1282	urn:mavedb:00000094-a-2	KCNQ4
1	40818260	C	G	ENSG00000117013	0.7987	urn:mavedb:00000094-a-2	KCNQ4
1	40818260	C	T	ENSG00000117013	1.7692	urn:mavedb:00000094-a-2	KCNQ4
1	40818261	G	A	ENSG00000117013	1.6338	urn:mavedb:00000094-a-2	KCNQ4
1	40818261	G	C	ENSG00000117013	-0.0138	urn:mavedb:00000094-a-2	KCNQ4
1	40818261	G	T	ENSG00000117013	1.8498	urn:mavedb:00000094-a-2	KCNQ4
1	40818263	T	A	ENSG00000117013	0.0002	urn:mavedb:00000094-a-2	KCNQ4
1	40818263	T	C	ENSG00000117013	0.1678	urn:mavedb:00000094-a-2	KCNQ4
1	40818263	T	G	ENSG00000117013	-0.0086	urn:mavedb:00000094-a-2	KCNQ4
1	40818264	T	A	ENSG00000117013	0.9345	urn:mavedb:00000094-a-2	KCNQ4
1	40818264	T	C	ENSG00000117013	-0.0755	urn:mavedb:00000094-a-2	KCNQ4
1	40818264	T	G	ENSG00000117013	0.0015	urn:mavedb:00000094-a-2	KCNQ4
1	40818265	T	A	ENSG00000117013	0.1678	urn:mavedb:00000094-a-2	KCNQ4
1	40818265	T	G	ENSG00000117013	0.1678	urn:mavedb:00000094-a-2	KCNQ4
1	40818266	G	A	ENSG00000117013	1.0535	urn:mavedb:00000094-a-2	KCNQ4
1	40818266	G	C	ENSG00000117013	-0.0212	urn:mavedb:00000094-a-2	KCNQ4
1	40818266	G	T	ENSG00000117013	1.0983	urn:mavedb:00000094-a-2	KCNQ4
1	40818267	C	A	ENSG00000117013	-0.0014	urn:mavedb:00000094-a-2	KCNQ4
1	40818267	C	G	ENSG00000117013	0.6827	urn:mavedb:00000094-a-2	KCNQ4
1	40818267	C	T	ENSG00000117013	1.2044	urn:mavedb:00000094-a-2	KCNQ4
1	40818269	A	G	ENSG00000117013	0.7806	urn:mavedb:00000094-a-2	KCNQ4
1	40818270	G	A	ENSG00000117013	0.9157	urn:mavedb:00000094-a-2	KCNQ4
1	40818270	G	C	ENSG00000117013	1.1792	urn:mavedb:00000094-a-2	KCNQ4
1	40818270	G	T	ENSG00000117013	1.4104	urn:mavedb:00000094-a-2	KCNQ4
1	40818271	A	C	ENSG00000117013	1.3662	urn:mavedb:00000094-a-2	KCNQ4
1	40818271	A	T	ENSG00000117013	1.3662	urn:mavedb:00000094-a-2	KCNQ4
1	40818272	A	C	ENSG00000117013	0.8956	urn:mavedb:00000094-a-2	KCNQ4
1	40818272	A	G	ENSG00000117013	1.078	urn:mavedb:00000094-a-2	KCNQ4
1	40818273	A	C	ENSG00000117013	1.2016	urn:mavedb:00000094-a-2	KCNQ4
1	40818273	A	G	ENSG00000117013	0.7755	urn:mavedb:00000094-a-2	KCNQ4
1	40818273	A	T	ENSG00000117013	1.4382	urn:mavedb:00000094-a-2	KCNQ4
1	40818274	G	C	ENSG00000117013	1.602	urn:mavedb:00000094-a-2	KCNQ4
1	40818274	G	T	ENSG00000117013	1.602	urn:mavedb:00000094-a-2	KCNQ4
1	40818275	C	A	ENSG00000117013	0.6772	urn:mavedb:00000094-a-2	KCNQ4
1	40818275	C	G	ENSG00000117013	0.6646	urn:mavedb:00000094-a-2	KCNQ4
1	40818275	C	T	ENSG00000117013	0.8471	urn:mavedb:00000094-a-2	KCNQ4
1	40818276	C	A	ENSG00000117013	0.235	urn:mavedb:00000094-a-2	KCNQ4
1	40818276	C	G	ENSG00000117013	0.241	urn:mavedb:00000094-a-2	KCNQ4
1	40818276	C	T	ENSG00000117013	0.9709	urn:mavedb:00000094-a-2	KCNQ4
1	40818278	T	A	ENSG00000117013	0.7977	urn:mavedb:00000094-a-2	KCNQ4
1	40818278	T	C	ENSG00000117013	1.2641	urn:mavedb:00000094-a-2	KCNQ4
1	40818278	T	G	ENSG00000117013	2.3395	urn:mavedb:00000094-a-2	KCNQ4
1	40818279	T	A	ENSG00000117013	1.1406	urn:mavedb:00000094-a-2	KCNQ4
1	40818279	T	C	ENSG00000117013	1.0108	urn:mavedb:00000094-a-2	KCNQ4
1	40818279	T	G	ENSG00000117013	0.6778	urn:mavedb:00000094-a-2	KCNQ4
1	40818280	C	A	ENSG00000117013	1.2641	urn:mavedb:00000094-a-2	KCNQ4
1	40818280	C	G	ENSG00000117013	1.2641	urn:mavedb:00000094-a-2	KCNQ4
1	40818281	T	A	ENSG00000117013	0.8314	urn:mavedb:00000094-a-2	KCNQ4
1	40818281	T	C	ENSG00000117013	0.9121	urn:mavedb:00000094-a-2	KCNQ4
1	40818281	T	G	ENSG00000117013	1.4737	urn:mavedb:00000094-a-2	KCNQ4
1	40818282	G	A	ENSG00000117013	0.8849	urn:mavedb:00000094-a-2	KCNQ4
1	40818282	G	C	ENSG00000117013	0.8314	urn:mavedb:00000094-a-2	KCNQ4
1	40818282	G	T	ENSG00000117013	0.7138	urn:mavedb:00000094-a-2	KCNQ4
1	40818283	T	G	ENSG00000117013	0.2285	urn:mavedb:00000094-a-2	KCNQ4
1	40818284	G	A	ENSG00000117013	0.8154	urn:mavedb:00000094-a-2	KCNQ4
1	40818284	G	C	ENSG00000117013	0.9701	urn:mavedb:00000094-a-2	KCNQ4
1	40818284	G	T	ENSG00000117013	0.035	urn:mavedb:00000094-a-2	KCNQ4
1	40818285	T	A	ENSG00000117013	-0.0112	urn:mavedb:00000094-a-2	KCNQ4
1	40818285	T	C	ENSG00000117013	1.225	urn:mavedb:00000094-a-2	KCNQ4
1	40818285	T	G	ENSG00000117013	0.6212	urn:mavedb:00000094-a-2	KCNQ4
1	40818287	A	C	ENSG00000117013	0.7549	urn:mavedb:00000094-a-2	KCNQ4
1	40818287	A	G	ENSG00000117013	0.9673	urn:mavedb:00000094-a-2	KCNQ4
1	40818287	A	T	ENSG00000117013	1.1071	urn:mavedb:00000094-a-2	KCNQ4
1	40818288	T	A	ENSG00000117013	0.8114	urn:mavedb:00000094-a-2	KCNQ4
1	40818288	T	C	ENSG00000117013	0.6166	urn:mavedb:00000094-a-2	KCNQ4
1	40818288	T	G	ENSG00000117013	1.4025	urn:mavedb:00000094-a-2	KCNQ4
1	40818289	C	G	ENSG00000117013	0.6818	urn:mavedb:00000094-a-2	KCNQ4
1	40818290	G	A	ENSG00000117013	0.005	urn:mavedb:00000094-a-2	KCNQ4
1	40818290	G	C	ENSG00000117013	0.7947	urn:mavedb:00000094-a-2	KCNQ4
1	40818290	G	T	ENSG00000117013	0.8068	urn:mavedb:00000094-a-2	KCNQ4
1	40818505	A	C	ENSG00000117013	0.8945	urn:mavedb:00000094-a-2	KCNQ4
1	40818505	A	G	ENSG00000117013	0.5093	urn:mavedb:00000094-a-2	KCNQ4
1	40818505	A	T	ENSG00000117013	0.0674	urn:mavedb:00000094-a-2	KCNQ4
1	40818506	C	A	ENSG00000117013	1.7131	urn:mavedb:00000094-a-2	KCNQ4
1	40818506	C	G	ENSG00000117013	1.7131	urn:mavedb:00000094-a-2	KCNQ4
1	40818507	T	A	ENSG00000117013	0.0054	urn:mavedb:00000094-a-2	KCNQ4
1	40818507	T	C	ENSG00000117013	0.9667	urn:mavedb:00000094-a-2	KCNQ4
1	40818507	T	G	ENSG00000117013	0.923	urn:mavedb:00000094-a-2	KCNQ4
1	40818508	T	A	ENSG00000117013	0.008	urn:mavedb:00000094-a-2	KCNQ4
1	40818508	T	C	ENSG00000117013	0.6826	urn:mavedb:00000094-a-2	KCNQ4
1	40818508	T	G	ENSG00000117013	0.7671	urn:mavedb:00000094-a-2	KCNQ4
1	40818509	C	A	ENSG00000117013	0.9667	urn:mavedb:00000094-a-2	KCNQ4
1	40818509	C	G	ENSG00000117013	0.9667	urn:mavedb:00000094-a-2	KCNQ4
1	40818510	A	C	ENSG00000117013	0.8342	urn:mavedb:00000094-a-2	KCNQ4
1	40818510	A	G	ENSG00000117013	0.9244	urn:mavedb:00000094-a-2	KCNQ4
1	40818510	A	T	ENSG00000117013	0.6519	urn:mavedb:00000094-a-2	KCNQ4
1	40818511	T	A	ENSG00000117013	-0.0174	urn:mavedb:00000094-a-2	KCNQ4
1	40818511	T	C	ENSG00000117013	1.1762	urn:mavedb:00000094-a-2	KCNQ4
1	40818511	T	G	ENSG00000117013	0.7997	urn:mavedb:00000094-a-2	KCNQ4
1	40818512	C	G	ENSG00000117013	0.8474	urn:mavedb:00000094-a-2	KCNQ4
1	40818513	G	A	ENSG00000117013	0.9569	urn:mavedb:00000094-a-2	KCNQ4
1	40818513	G	C	ENSG00000117013	1.2518	urn:mavedb:00000094-a-2	KCNQ4
1	40818513	G	T	ENSG00000117013	1.2518	urn:mavedb:00000094-a-2	KCNQ4
1	40818514	T	A	ENSG00000117013	0.2306	urn:mavedb:00000094-a-2	KCNQ4
1	40818514	T	C	ENSG00000117013	0.7981	urn:mavedb:00000094-a-2	KCNQ4
1	40818514	T	G	ENSG00000117013	0.8598	urn:mavedb:00000094-a-2	KCNQ4
1	40818516	T	A	ENSG00000117013	0.8671	urn:mavedb:00000094-a-2	KCNQ4
1	40818516	T	C	ENSG00000117013	0.829	urn:mavedb:00000094-a-2	KCNQ4
1	40818516	T	G	ENSG00000117013	0.6388	urn:mavedb:00000094-a-2	KCNQ4
1	40818517	T	A	ENSG00000117013	0.8506	urn:mavedb:00000094-a-2	KCNQ4
1	40818517	T	C	ENSG00000117013	1.0511	urn:mavedb:00000094-a-2	KCNQ4
1	40818517	T	G	ENSG00000117013	1.1061	urn:mavedb:00000094-a-2	KCNQ4
1	40818518	C	A	ENSG00000117013	0.829	urn:mavedb:00000094-a-2	KCNQ4
1	40818518	C	G	ENSG00000117013	0.829	urn:mavedb:00000094-a-2	KCNQ4
1	40818519	G	A	ENSG00000117013	0.6995	urn:mavedb:00000094-a-2	KCNQ4
1	40818519	G	C	ENSG00000117013	1.2907	urn:mavedb:00000094-a-2	KCNQ4
1	40818519	G	T	ENSG00000117013	1.2907	urn:mavedb:00000094-a-2	KCNQ4
1	40818520	T	A	ENSG00000117013	0.0465	urn:mavedb:00000094-a-2	KCNQ4
1	40818520	T	C	ENSG00000117013	0.8594	urn:mavedb:00000094-a-2	KCNQ4
1	40818520	T	G	ENSG00000117013	0.7395	urn:mavedb:00000094-a-2	KCNQ4
1	40818522	G	A	ENSG00000117013	0.7576	urn:mavedb:00000094-a-2	KCNQ4
1	40818522	G	C	ENSG00000117013	0.5934	urn:mavedb:00000094-a-2	KCNQ4
1	40818522	G	T	ENSG00000117013	0.9271	urn:mavedb:00000094-a-2	KCNQ4
1	40818523	C	A	ENSG00000117013	0.7435	urn:mavedb:00000094-a-2	KCNQ4
1	40818523	C	G	ENSG00000117013	1.0148	urn:mavedb:00000094-a-2	KCNQ4
1	40818523	C	T	ENSG00000117013	0.8511	urn:mavedb:00000094-a-2	KCNQ4
1	40818525	T	A	ENSG00000117013	1.0092	urn:mavedb:00000094-a-2	KCNQ4
1	40818525	T	C	ENSG00000117013	0.4599	urn:mavedb:00000094-a-2	KCNQ4
1	40818525	T	G	ENSG00000117013	0.9037	urn:mavedb:00000094-a-2	KCNQ4
1	40818526	C	G	ENSG00000117013	0.1367	urn:mavedb:00000094-a-2	KCNQ4
1	40818526	C	T	ENSG00000117013	0.9481	urn:mavedb:00000094-a-2	KCNQ4
1	40818528	G	A	ENSG00000117013	0.907	urn:mavedb:00000094-a-2	KCNQ4
1	40818528	G	C	ENSG00000117013	0.8461	urn:mavedb:00000094-a-2	KCNQ4
1	40818528	G	T	ENSG00000117013	0.8461	urn:mavedb:00000094-a-2	KCNQ4
1	40818529	T	A	ENSG00000117013	-0.008	urn:mavedb:00000094-a-2	KCNQ4
1	40818529	T	C	ENSG00000117013	0.9124	urn:mavedb:00000094-a-2	KCNQ4
1	40818529	T	G	ENSG00000117013	0.1195	urn:mavedb:00000094-a-2	KCNQ4
1	40818531	G	A	ENSG00000117013	0.787	urn:mavedb:00000094-a-2	KCNQ4
1	40818531	G	C	ENSG00000117013	0.9737	urn:mavedb:00000094-a-2	KCNQ4
1	40818531	G	T	ENSG00000117013	0.8044	urn:mavedb:00000094-a-2	KCNQ4
1	40818532	C	A	ENSG00000117013	-0.0313	urn:mavedb:00000094-a-2	KCNQ4
1	40818532	C	G	ENSG00000117013	0.8756	urn:mavedb:00000094-a-2	KCNQ4
1	40818532	C	T	ENSG00000117013	0.9661	urn:mavedb:00000094-a-2	KCNQ4
1	40818534	G	A	ENSG00000117013	1.1551	urn:mavedb:00000094-a-2	KCNQ4
1	40818534	G	C	ENSG00000117013	0.681	urn:mavedb:00000094-a-2	KCNQ4
1	40818534	G	T	ENSG00000117013	0.7318	urn:mavedb:00000094-a-2	KCNQ4
1	40818535	T	A	ENSG00000117013	1.0039	urn:mavedb:00000094-a-2	KCNQ4
1	40818535	T	C	ENSG00000117013	0.8219	urn:mavedb:00000094-a-2	KCNQ4
1	40818535	T	G	ENSG00000117013	0.9457	urn:mavedb:00000094-a-2	KCNQ4
1	40818537	A	C	ENSG00000117013	0.0662	urn:mavedb:00000094-a-2	KCNQ4
1	40818537	A	G	ENSG00000117013	-0.0102	urn:mavedb:00000094-a-2	KCNQ4
1	40818537	A	T	ENSG00000117013	0.7184	urn:mavedb:00000094-a-2	KCNQ4
1	40818538	T	A	ENSG00000117013	0.6251	urn:mavedb:00000094-a-2	KCNQ4
1	40818538	T	C	ENSG00000117013	0.8728	urn:mavedb:00000094-a-2	KCNQ4
1	40818538	T	G	ENSG00000117013	0.7618	urn:mavedb:00000094-a-2	KCNQ4
1	40818539	C	G	ENSG00000117013	0.9984	urn:mavedb:00000094-a-2	KCNQ4
1	40818540	G	A	ENSG00000117013	0.9714	urn:mavedb:00000094-a-2	KCNQ4
1	40818540	G	C	ENSG00000117013	0.0608	urn:mavedb:00000094-a-2	KCNQ4
1	40818540	G	T	ENSG00000117013	0.6236	urn:mavedb:00000094-a-2	KCNQ4
1	40818541	C	A	ENSG00000117013	0.0374	urn:mavedb:00000094-a-2	KCNQ4
1	40818541	C	G	ENSG00000117013	0.8629	urn:mavedb:00000094-a-2	KCNQ4
1	40818541	C	T	ENSG00000117013	1.1437	urn:mavedb:00000094-a-2	KCNQ4
1	40818543	G	A	ENSG00000117013	0.1807	urn:mavedb:00000094-a-2	KCNQ4
1	40818543	G	C	ENSG00000117013	0.7788	urn:mavedb:00000094-a-2	KCNQ4
1	40818543	G	T	ENSG00000117013	1.0602	urn:mavedb:00000094-a-2	KCNQ4
1	40818544	C	A	ENSG00000117013	1.0796	urn:mavedb:00000094-a-2	KCNQ4
1	40818544	C	G	ENSG00000117013	0.6336	urn:mavedb:00000094-a-2	KCNQ4
1	40818544	C	T	ENSG00000117013	1.1409	urn:mavedb:00000094-a-2	KCNQ4
1	40818546	G	A	ENSG00000117013	0.6424	urn:mavedb:00000094-a-2	KCNQ4
1	40818546	G	C	ENSG00000117013	1.0278	urn:mavedb:00000094-a-2	KCNQ4
1	40818546	G	T	ENSG00000117013	0.3314	urn:mavedb:00000094-a-2	KCNQ4
1	40818547	G	A	ENSG00000117013	0.974	urn:mavedb:00000094-a-2	KCNQ4
1	40818547	G	C	ENSG00000117013	-0.0147	urn:mavedb:00000094-a-2	KCNQ4
1	40818547	G	T	ENSG00000117013	0.056	urn:mavedb:00000094-a-2	KCNQ4
1	40818549	A	C	ENSG00000117013	0.6565	urn:mavedb:00000094-a-2	KCNQ4
1	40818549	A	G	ENSG00000117013	0.8651	urn:mavedb:00000094-a-2	KCNQ4
1	40818549	A	T	ENSG00000117013	0.6583	urn:mavedb:00000094-a-2	KCNQ4
1	40818550	C	A	ENSG00000117013	0.6772	urn:mavedb:00000094-a-2	KCNQ4
1	40818550	C	G	ENSG00000117013	0.6583	urn:mavedb:00000094-a-2	KCNQ4
1	40818550	C	T	ENSG00000117013	0.0076	urn:mavedb:00000094-a-2	KCNQ4
1	40818552	C	A	ENSG00000117013	1.2011	urn:mavedb:00000094-a-2	KCNQ4
1	40818552	C	G	ENSG00000117013	0.7949	urn:mavedb:00000094-a-2	KCNQ4
1	40818553	A	C	ENSG00000117013	0.6074	urn:mavedb:00000094-a-2	KCNQ4
1	40818553	A	G	ENSG00000117013	0.5993	urn:mavedb:00000094-a-2	KCNQ4
1	40818553	A	T	ENSG00000117013	1.1309	urn:mavedb:00000094-a-2	KCNQ4
1	40818554	G	C	ENSG00000117013	0.8766	urn:mavedb:00000094-a-2	KCNQ4
1	40818554	G	T	ENSG00000117013	0.8766	urn:mavedb:00000094-a-2	KCNQ4
1	40818555	G	A	ENSG00000117013	1.1232	urn:mavedb:00000094-a-2	KCNQ4
1	40818555	G	C	ENSG00000117013	0.712	urn:mavedb:00000094-a-2	KCNQ4
1	40818555	G	T	ENSG00000117013	0.8578	urn:mavedb:00000094-a-2	KCNQ4
1	40818556	G	A	ENSG00000117013	0.696	urn:mavedb:00000094-a-2	KCNQ4
1	40818556	G	C	ENSG00000117013	0.804	urn:mavedb:00000094-a-2	KCNQ4
1	40818556	G	T	ENSG00000117013	0.7538	urn:mavedb:00000094-a-2	KCNQ4
1	40818558	A	C	ENSG00000117013	0.6497	urn:mavedb:00000094-a-2	KCNQ4
1	40818558	A	G	ENSG00000117013	0.866	urn:mavedb:00000094-a-2	KCNQ4
1	40818558	A	T	ENSG00000117013	0.7072	urn:mavedb:00000094-a-2	KCNQ4
1	40818559	A	C	ENSG00000117013	0.7844	urn:mavedb:00000094-a-2	KCNQ4
1	40818559	A	G	ENSG00000117013	0.8815	urn:mavedb:00000094-a-2	KCNQ4
1	40818559	A	T	ENSG00000117013	0.1888	urn:mavedb:00000094-a-2	KCNQ4
1	40818560	C	A	ENSG00000117013	0.73	urn:mavedb:00000094-a-2	KCNQ4
1	40818560	C	G	ENSG00000117013	0.73	urn:mavedb:00000094-a-2	KCNQ4
1	40818561	A	C	ENSG00000117013	0.8206	urn:mavedb:00000094-a-2	KCNQ4
1	40818561	A	G	ENSG00000117013	0.8456	urn:mavedb:00000094-a-2	KCNQ4
1	40818561	A	T	ENSG00000117013	1.0232	urn:mavedb:00000094-a-2	KCNQ4
1	40818562	T	A	ENSG00000117013	0.1631	urn:mavedb:00000094-a-2	KCNQ4
1	40818562	T	C	ENSG00000117013	0.8524	urn:mavedb:00000094-a-2	KCNQ4
1	40818562	T	G	ENSG00000117013	0.7952	urn:mavedb:00000094-a-2	KCNQ4
1	40818563	C	G	ENSG00000117013	0.7436	urn:mavedb:00000094-a-2	KCNQ4
1	40818564	T	A	ENSG00000117013	0.6159	urn:mavedb:00000094-a-2	KCNQ4
1	40818564	T	C	ENSG00000117013	0.743	urn:mavedb:00000094-a-2	KCNQ4
1	40818564	T	G	ENSG00000117013	0.9856	urn:mavedb:00000094-a-2	KCNQ4
1	40818565	T	A	ENSG00000117013	0.7154	urn:mavedb:00000094-a-2	KCNQ4
1	40818565	T	C	ENSG00000117013	0.0259	urn:mavedb:00000094-a-2	KCNQ4
1	40818565	T	G	ENSG00000117013	0.0063	urn:mavedb:00000094-a-2	KCNQ4
1	40818566	C	A	ENSG00000117013	0.743	urn:mavedb:00000094-a-2	KCNQ4
1	40818566	C	G	ENSG00000117013	0.743	urn:mavedb:00000094-a-2	KCNQ4
1	40818567	G	A	ENSG00000117013	0.8916	urn:mavedb:00000094-a-2	KCNQ4
1	40818567	G	C	ENSG00000117013	0.0102	urn:mavedb:00000094-a-2	KCNQ4
1	40818567	G	T	ENSG00000117013	0.7219	urn:mavedb:00000094-a-2	KCNQ4
1	40818568	C	A	ENSG00000117013	0.0991	urn:mavedb:00000094-a-2	KCNQ4
1	40818568	C	G	ENSG00000117013	0.9262	urn:mavedb:00000094-a-2	KCNQ4
1	40818568	C	T	ENSG00000117013	0.8482	urn:mavedb:00000094-a-2	KCNQ4
1	40818570	A	C	ENSG00000117013	0.5748	urn:mavedb:00000094-a-2	KCNQ4
1	40818570	A	G	ENSG00000117013	0.7935	urn:mavedb:00000094-a-2	KCNQ4
1	40818570	A	T	ENSG00000117013	0.9282	urn:mavedb:00000094-a-2	KCNQ4
1	40818571	C	A	ENSG00000117013	0.7992	urn:mavedb:00000094-a-2	KCNQ4
1	40818571	C	G	ENSG00000117013	0.6064	urn:mavedb:00000094-a-2	KCNQ4
1	40818571	C	T	ENSG00000117013	0.4098	urn:mavedb:00000094-a-2	KCNQ4
1	40818573	T	A	ENSG00000117013	0.6741	urn:mavedb:00000094-a-2	KCNQ4
1	40818573	T	C	ENSG00000117013	0.8816	urn:mavedb:00000094-a-2	KCNQ4
1	40818573	T	G	ENSG00000117013	1.1127	urn:mavedb:00000094-a-2	KCNQ4
1	40818574	C	A	ENSG00000117013	0.8788	urn:mavedb:00000094-a-2	KCNQ4
1	40818574	C	G	ENSG00000117013	0.0186	urn:mavedb:00000094-a-2	KCNQ4
1	40818574	C	T	ENSG00000117013	0.8385	urn:mavedb:00000094-a-2	KCNQ4
1	40818576	G	A	ENSG00000117013	0.6298	urn:mavedb:00000094-a-2	KCNQ4
1	40818576	G	C	ENSG00000117013	0.5489	urn:mavedb:00000094-a-2	KCNQ4
1	40818576	G	T	ENSG00000117013	1.1076	urn:mavedb:00000094-a-2	KCNQ4
1	40818577	C	A	ENSG00000117013	0.3113	urn:mavedb:00000094-a-2	KCNQ4
1	40818577	C	G	ENSG00000117013	0.7156	urn:mavedb:00000094-a-2	KCNQ4
1	40818577	C	T	ENSG00000117013	0.6607	urn:mavedb:00000094-a-2	KCNQ4
1	40818579	C	A	ENSG00000117013	0.7455	urn:mavedb:00000094-a-2	KCNQ4
1	40818579	C	G	ENSG00000117013	1.0157	urn:mavedb:00000094-a-2	KCNQ4
1	40818580	T	A	ENSG00000117013	0.6691	urn:mavedb:00000094-a-2	KCNQ4
1	40818580	T	C	ENSG00000117013	0.8454	urn:mavedb:00000094-a-2	KCNQ4
1	40818580	T	G	ENSG00000117013	0.1246	urn:mavedb:00000094-a-2	KCNQ4
1	40818582	C	A	ENSG00000117013	0.6989	urn:mavedb:00000094-a-2	KCNQ4
1	40818582	C	G	ENSG00000117013	0.9765	urn:mavedb:00000094-a-2	KCNQ4
1	40818582	C	T	ENSG00000117013	1.1404	urn:mavedb:00000094-a-2	KCNQ4
1	40818583	G	A	ENSG00000117013	0.2891	urn:mavedb:00000094-a-2	KCNQ4
1	40818583	G	C	ENSG00000117013	0.8735	urn:mavedb:00000094-a-2	KCNQ4
1	40818583	G	T	ENSG00000117013	0.5196	urn:mavedb:00000094-a-2	KCNQ4
1	40818585	A	C	ENSG00000117013	0.2324	urn:mavedb:00000094-a-2	KCNQ4
1	40818585	A	G	ENSG00000117013	1.1413	urn:mavedb:00000094-a-2	KCNQ4
1	40818585	A	T	ENSG00000117013	0.598	urn:mavedb:00000094-a-2	KCNQ4
1	40818586	G	A	ENSG00000117013	0.9401	urn:mavedb:00000094-a-2	KCNQ4
1	40818586	G	C	ENSG00000117013	1.4006	urn:mavedb:00000094-a-2	KCNQ4
1	40818586	G	T	ENSG00000117013	0.7708	urn:mavedb:00000094-a-2	KCNQ4
1	40818587	C	A	ENSG00000117013	0.2324	urn:mavedb:00000094-a-2	KCNQ4
1	40818587	C	G	ENSG00000117013	0.2324	urn:mavedb:00000094-a-2	KCNQ4
1	40818588	A	C	ENSG00000117013	0.8618	urn:mavedb:00000094-a-2	KCNQ4
1	40818588	A	G	ENSG00000117013	0.7293	urn:mavedb:00000094-a-2	KCNQ4
1	40818588	A	T	ENSG00000117013	0.8618	urn:mavedb:00000094-a-2	KCNQ4
1	40818589	T	A	ENSG00000117013	0.2496	urn:mavedb:00000094-a-2	KCNQ4
1	40818589	T	C	ENSG00000117013	0.9484	urn:mavedb:00000094-a-2	KCNQ4
1	40818589	T	G	ENSG00000117013	0.3159	urn:mavedb:00000094-a-2	KCNQ4
1	40818590	G	A	ENSG00000117013	0.6193	urn:mavedb:00000094-a-2	KCNQ4
1	40818590	G	C	ENSG00000117013	0.6193	urn:mavedb:00000094-a-2	KCNQ4
1	40818590	G	T	ENSG00000117013	0.6193	urn:mavedb:00000094-a-2	KCNQ4
1	40818591	C	A	ENSG00000117013	0.422	urn:mavedb:00000094-a-2	KCNQ4
1	40818591	C	G	ENSG00000117013	0.0063	urn:mavedb:00000094-a-2	KCNQ4
1	40818591	C	T	ENSG00000117013	0.0052	urn:mavedb:00000094-a-2	KCNQ4
1	40818592	G	A	ENSG00000117013	0.3265	urn:mavedb:00000094-a-2	KCNQ4
1	40818592	G	C	ENSG00000117013	0.0308	urn:mavedb:00000094-a-2	KCNQ4
1	40818592	G	T	ENSG00000117013	-0.0879	urn:mavedb:00000094-a-2	KCNQ4
1	40818594	T	A	ENSG00000117013	1.3285	urn:mavedb:00000094-a-2	KCNQ4
1	40818594	T	C	ENSG00000117013	0.9618	urn:mavedb:00000094-a-2	KCNQ4
1	40818594	T	G	ENSG00000117013	1.0897	urn:mavedb:00000094-a-2	KCNQ4
1	40818595	T	A	ENSG00000117013	0.719	urn:mavedb:00000094-a-2	KCNQ4
1	40818595	T	C	ENSG00000117013	0.9068	urn:mavedb:00000094-a-2	KCNQ4
1	40818595	T	G	ENSG00000117013	0.8393	urn:mavedb:00000094-a-2	KCNQ4
1	40818596	C	A	ENSG00000117013	0.9618	urn:mavedb:00000094-a-2	KCNQ4
1	40818596	C	G	ENSG00000117013	0.9618	urn:mavedb:00000094-a-2	KCNQ4
1	40818597	C	A	ENSG00000117013	1.8417	urn:mavedb:00000094-a-2	KCNQ4
1	40818597	C	G	ENSG00000117013	0.8881	urn:mavedb:00000094-a-2	KCNQ4
1	40818598	T	A	ENSG00000117013	0.9713	urn:mavedb:00000094-a-2	KCNQ4
1	40818598	T	C	ENSG00000117013	0.8158	urn:mavedb:00000094-a-2	KCNQ4
1	40818598	T	G	ENSG00000117013	0.116	urn:mavedb:00000094-a-2	KCNQ4
1	40818600	C	A	ENSG00000117013	1.281	urn:mavedb:00000094-a-2	KCNQ4
1	40818600	C	G	ENSG00000117013	0.8492	urn:mavedb:00000094-a-2	KCNQ4
1	40818601	A	C	ENSG00000117013	1.5247	urn:mavedb:00000094-a-2	KCNQ4
1	40818601	A	G	ENSG00000117013	0.1145	urn:mavedb:00000094-a-2	KCNQ4
1	40818601	A	T	ENSG00000117013	1.2894	urn:mavedb:00000094-a-2	KCNQ4
1	40818602	G	C	ENSG00000117013	0.9607	urn:mavedb:00000094-a-2	KCNQ4
1	40818602	G	T	ENSG00000117013	0.9607	urn:mavedb:00000094-a-2	KCNQ4
1	40818603	A	C	ENSG00000117013	0.6724	urn:mavedb:00000094-a-2	KCNQ4
1	40818603	A	G	ENSG00000117013	1.0319	urn:mavedb:00000094-a-2	KCNQ4
1	40818603	A	T	ENSG00000117013	0.5363	urn:mavedb:00000094-a-2	KCNQ4
1	40818604	T	A	ENSG00000117013	0.321	urn:mavedb:00000094-a-2	KCNQ4
1	40818604	T	C	ENSG00000117013	0.7089	urn:mavedb:00000094-a-2	KCNQ4
1	40818604	T	G	ENSG00000117013	0.6469	urn:mavedb:00000094-a-2	KCNQ4
1	40818605	C	G	ENSG00000117013	1.107	urn:mavedb:00000094-a-2	KCNQ4
1	40818606	C	A	ENSG00000117013	1.0981	urn:mavedb:00000094-a-2	KCNQ4
1	40818606	C	G	ENSG00000117013	1.4562	urn:mavedb:00000094-a-2	KCNQ4
1	40818607	T	A	ENSG00000117013	0.9159	urn:mavedb:00000094-a-2	KCNQ4
1	40818607	T	C	ENSG00000117013	0.3185	urn:mavedb:00000094-a-2	KCNQ4
1	40818607	T	G	ENSG00000117013	0.0505	urn:mavedb:00000094-a-2	KCNQ4
1	40818609	C	A	ENSG00000117013	1.0712	urn:mavedb:00000094-a-2	KCNQ4
1	40818609	C	G	ENSG00000117013	0.5759	urn:mavedb:00000094-a-2	KCNQ4
1	40818609	C	T	ENSG00000117013	0.7831	urn:mavedb:00000094-a-2	KCNQ4
1	40818610	G	A	ENSG00000117013	1.0374	urn:mavedb:00000094-a-2	KCNQ4
1	40818610	G	C	ENSG00000117013	0.0726	urn:mavedb:00000094-a-2	KCNQ4
1	40818610	G	T	ENSG00000117013	0.4655	urn:mavedb:00000094-a-2	KCNQ4
1	40818612	A	C	ENSG00000117013	1.4434	urn:mavedb:00000094-a-2	KCNQ4
1	40818612	A	G	ENSG00000117013	0.9993	urn:mavedb:00000094-a-2	KCNQ4
1	40818612	A	T	ENSG00000117013	1.4434	urn:mavedb:00000094-a-2	KCNQ4
1	40818613	T	A	ENSG00000117013	-0.005	urn:mavedb:00000094-a-2	KCNQ4
1	40818613	T	C	ENSG00000117013	0.845	urn:mavedb:00000094-a-2	KCNQ4
1	40818613	T	G	ENSG00000117013	-0.022	urn:mavedb:00000094-a-2	KCNQ4
1	40818614	G	A	ENSG00000117013	1.1227	urn:mavedb:00000094-a-2	KCNQ4
1	40818614	G	C	ENSG00000117013	1.1227	urn:mavedb:00000094-a-2	KCNQ4
1	40818614	G	T	ENSG00000117013	1.1227	urn:mavedb:00000094-a-2	KCNQ4
1	40818615	G	A	ENSG00000117013	1.3269	urn:mavedb:00000094-a-2	KCNQ4
1	40818615	G	C	ENSG00000117013	1.0245	urn:mavedb:00000094-a-2	KCNQ4
1	40818615	G	T	ENSG00000117013	1.0245	urn:mavedb:00000094-a-2	KCNQ4
1	40818616	T	A	ENSG00000117013	0.0204	urn:mavedb:00000094-a-2	KCNQ4
1	40818616	T	C	ENSG00000117013	0.8878	urn:mavedb:00000094-a-2	KCNQ4
1	40818616	T	G	ENSG00000117013	1.3116	urn:mavedb:00000094-a-2	KCNQ4
1	40818618	C	A	ENSG00000117013	0.7762	urn:mavedb:00000094-a-2	KCNQ4
1	40818618	C	G	ENSG00000117013	1.0699	urn:mavedb:00000094-a-2	KCNQ4
1	40818618	C	T	ENSG00000117013	0.6992	urn:mavedb:00000094-a-2	KCNQ4
1	40818619	G	A	ENSG00000117013	0.9175	urn:mavedb:00000094-a-2	KCNQ4
1	40818619	G	C	ENSG00000117013	0.5115	urn:mavedb:00000094-a-2	KCNQ4
1	40818619	G	T	ENSG00000117013	1.2808	urn:mavedb:00000094-a-2	KCNQ4
1	40818621	A	C	ENSG00000117013	1.2175	urn:mavedb:00000094-a-2	KCNQ4
1	40818621	A	G	ENSG00000117013	0.6781	urn:mavedb:00000094-a-2	KCNQ4
1	40818621	A	T	ENSG00000117013	1.2175	urn:mavedb:00000094-a-2	KCNQ4
1	40818622	T	A	ENSG00000117013	0.0096	urn:mavedb:00000094-a-2	KCNQ4
1	40818622	T	C	ENSG00000117013	0.6332	urn:mavedb:00000094-a-2	KCNQ4
1	40818622	T	G	ENSG00000117013	0.0091	urn:mavedb:00000094-a-2	KCNQ4
1	40818623	G	A	ENSG00000117013	1.0507	urn:mavedb:00000094-a-2	KCNQ4
1	40818623	G	C	ENSG00000117013	1.0507	urn:mavedb:00000094-a-2	KCNQ4
1	40818623	G	T	ENSG00000117013	1.0507	urn:mavedb:00000094-a-2	KCNQ4
1	40818624	G	A	ENSG00000117013	0.4044	urn:mavedb:00000094-a-2	KCNQ4
1	40818624	G	C	ENSG00000117013	0.1604	urn:mavedb:00000094-a-2	KCNQ4
1	40818624	G	T	ENSG00000117013	0.6728	urn:mavedb:00000094-a-2	KCNQ4
1	40818625	A	C	ENSG00000117013	0.4956	urn:mavedb:00000094-a-2	KCNQ4
1	40818625	A	G	ENSG00000117013	0.7094	urn:mavedb:00000094-a-2	KCNQ4
1	40818625	A	T	ENSG00000117013	0.2621	urn:mavedb:00000094-a-2	KCNQ4
1	40818626	C	A	ENSG00000117013	2.3098	urn:mavedb:00000094-a-2	KCNQ4
1	40818626	C	G	ENSG00000117013	2.3098	urn:mavedb:00000094-a-2	KCNQ4
1	40818627	C	A	ENSG00000117013	0.7562	urn:mavedb:00000094-a-2	KCNQ4
1	40818627	C	G	ENSG00000117013	0.5948	urn:mavedb:00000094-a-2	KCNQ4
1	40818627	C	T	ENSG00000117013	1.9696	urn:mavedb:00000094-a-2	KCNQ4
1	40818628	G	A	ENSG00000117013	0.5894	urn:mavedb:00000094-a-2	KCNQ4
1	40818628	G	C	ENSG00000117013	4.0936	urn:mavedb:00000094-a-2	KCNQ4
1	40818628	G	T	ENSG00000117013	1.6369	urn:mavedb:00000094-a-2	KCNQ4
1	40818630	C	A	ENSG00000117013	1.0853	urn:mavedb:00000094-a-2	KCNQ4
1	40818630	C	G	ENSG00000117013	0.7897	urn:mavedb:00000094-a-2	KCNQ4
1	40818630	C	T	ENSG00000117013	1.3326	urn:mavedb:00000094-a-2	KCNQ4
1	40818631	G	A	ENSG00000117013	1.118	urn:mavedb:00000094-a-2	KCNQ4
1	40818631	G	C	ENSG00000117013	0.1695	urn:mavedb:00000094-a-2	KCNQ4
1	40818631	G	T	ENSG00000117013	0.5298	urn:mavedb:00000094-a-2	KCNQ4
1	40818633	G	A	ENSG00000117013	0.6341	urn:mavedb:00000094-a-2	KCNQ4
1	40818633	G	C	ENSG00000117013	0.0375	urn:mavedb:00000094-a-2	KCNQ4
1	40818633	G	T	ENSG00000117013	0.964	urn:mavedb:00000094-a-2	KCNQ4
1	40818634	G	A	ENSG00000117013	0.1477	urn:mavedb:00000094-a-2	KCNQ4
1	40818634	G	C	ENSG00000117013	0.5591	urn:mavedb:00000094-a-2	KCNQ4
1	40818634	G	T	ENSG00000117013	0.2451	urn:mavedb:00000094-a-2	KCNQ4
1	40818636	G	A	ENSG00000117013	1.0047	urn:mavedb:00000094-a-2	KCNQ4
1	40818636	G	C	ENSG00000117013	0.7026	urn:mavedb:00000094-a-2	KCNQ4
1	40818636	G	T	ENSG00000117013	0.1166	urn:mavedb:00000094-a-2	KCNQ4
1	40818637	G	A	ENSG00000117013	0.3149	urn:mavedb:00000094-a-2	KCNQ4
1	40818637	G	C	ENSG00000117013	0.3355	urn:mavedb:00000094-a-2	KCNQ4
1	40818637	G	T	ENSG00000117013	0.0314	urn:mavedb:00000094-a-2	KCNQ4
1	40818639	A	C	ENSG00000117013	1.4294	urn:mavedb:00000094-a-2	KCNQ4
1	40818639	A	G	ENSG00000117013	2.5153	urn:mavedb:00000094-a-2	KCNQ4
1	40818639	A	T	ENSG00000117013	1.1151	urn:mavedb:00000094-a-2	KCNQ4
1	40818640	C	A	ENSG00000117013	0.0695	urn:mavedb:00000094-a-2	KCNQ4
1	40818640	C	G	ENSG00000117013	1.1151	urn:mavedb:00000094-a-2	KCNQ4
1	40818640	C	T	ENSG00000117013	1.0732	urn:mavedb:00000094-a-2	KCNQ4
1	40818642	T	A	ENSG00000117013	-0.0195	urn:mavedb:00000094-a-2	KCNQ4
1	40818642	T	C	ENSG00000117013	-0.0195	urn:mavedb:00000094-a-2	KCNQ4
1	40818642	T	G	ENSG00000117013	-0.0236	urn:mavedb:00000094-a-2	KCNQ4
1	40818643	G	C	ENSG00000117013	0.0058	urn:mavedb:00000094-a-2	KCNQ4
1	40818643	G	T	ENSG00000117013	0.9712	urn:mavedb:00000094-a-2	KCNQ4
1	40818644	G	C	ENSG00000117013	0.0959	urn:mavedb:00000094-a-2	KCNQ4
1	40818644	G	T	ENSG00000117013	0.0959	urn:mavedb:00000094-a-2	KCNQ4
1	40818645	A	C	ENSG00000117013	0.889	urn:mavedb:00000094-a-2	KCNQ4
1	40818645	A	G	ENSG00000117013	1.0176	urn:mavedb:00000094-a-2	KCNQ4
1	40818646	A	C	ENSG00000117013	1.1224	urn:mavedb:00000094-a-2	KCNQ4
1	40818646	A	G	ENSG00000117013	1.1224	urn:mavedb:00000094-a-2	KCNQ4
1	40818646	A	T	ENSG00000117013	0.6967	urn:mavedb:00000094-a-2	KCNQ4
1	40818647	G	C	ENSG00000117013	1.2441	urn:mavedb:00000094-a-2	KCNQ4
1	40818647	G	T	ENSG00000117013	1.2441	urn:mavedb:00000094-a-2	KCNQ4
1	40818648	C	A	ENSG00000117013	0.0662	urn:mavedb:00000094-a-2	KCNQ4
1	40818648	C	G	ENSG00000117013	-0.0551	urn:mavedb:00000094-a-2	KCNQ4
1	40818649	T	A	ENSG00000117013	-0.0279	urn:mavedb:00000094-a-2	KCNQ4
1	40818649	T	C	ENSG00000117013	-0.0382	urn:mavedb:00000094-a-2	KCNQ4
1	40818649	T	G	ENSG00000117013	-0.0201	urn:mavedb:00000094-a-2	KCNQ4
1	40818651	C	A	ENSG00000117013	0.0448	urn:mavedb:00000094-a-2	KCNQ4
1	40818651	C	G	ENSG00000117013	4.4066	urn:mavedb:00000094-a-2	KCNQ4
1	40818652	T	A	ENSG00000117013	0.0048	urn:mavedb:00000094-a-2	KCNQ4
1	40818652	T	C	ENSG00000117013	-0.0187	urn:mavedb:00000094-a-2	KCNQ4
1	40818652	T	G	ENSG00000117013	-0.0152	urn:mavedb:00000094-a-2	KCNQ4
1	40818654	G	A	ENSG00000117013	1.3402	urn:mavedb:00000094-a-2	KCNQ4
1	40818654	G	C	ENSG00000117013	0.7721	urn:mavedb:00000094-a-2	KCNQ4
1	40818654	G	T	ENSG00000117013	1.0235	urn:mavedb:00000094-a-2	KCNQ4
1	40818655	G	A	ENSG00000117013	0.0471	urn:mavedb:00000094-a-2	KCNQ4
1	40818655	G	C	ENSG00000117013	1.2338	urn:mavedb:00000094-a-2	KCNQ4
1	40818655	G	T	ENSG00000117013	1.2458	urn:mavedb:00000094-a-2	KCNQ4
1	40818657	T	A	ENSG00000117013	0.0773	urn:mavedb:00000094-a-2	KCNQ4
1	40818657	T	C	ENSG00000117013	-0.0568	urn:mavedb:00000094-a-2	KCNQ4
1	40818657	T	G	ENSG00000117013	1.2464	urn:mavedb:00000094-a-2	KCNQ4
1	40818658	C	T	ENSG00000117013	0.9294	urn:mavedb:00000094-a-2	KCNQ4
1	40818660	G	A	ENSG00000117013	-0.0177	urn:mavedb:00000094-a-2	KCNQ4
1	40818660	G	C	ENSG00000117013	-0.0219	urn:mavedb:00000094-a-2	KCNQ4
1	40818660	G	T	ENSG00000117013	-0.0219	urn:mavedb:00000094-a-2	KCNQ4
1	40818661	T	A	ENSG00000117013	-0.0261	urn:mavedb:00000094-a-2	KCNQ4
1	40818661	T	C	ENSG00000117013	0.3709	urn:mavedb:00000094-a-2	KCNQ4
1	40818661	T	G	ENSG00000117013	-0.0264	urn:mavedb:00000094-a-2	KCNQ4
1	40818663	G	A	ENSG00000117013	1.1991	urn:mavedb:00000094-a-2	KCNQ4
1	40818663	G	C	ENSG00000117013	3.7396	urn:mavedb:00000094-a-2	KCNQ4
1	40818663	G	T	ENSG00000117013	0.6841	urn:mavedb:00000094-a-2	KCNQ4
1	40818664	T	A	ENSG00000117013	-0.0045	urn:mavedb:00000094-a-2	KCNQ4
1	40818664	T	C	ENSG00000117013	0.1571	urn:mavedb:00000094-a-2	KCNQ4
1	40818664	T	G	ENSG00000117013	0.0215	urn:mavedb:00000094-a-2	KCNQ4
1	40818666	T	A	ENSG00000117013	0.8475	urn:mavedb:00000094-a-2	KCNQ4
1	40818666	T	C	ENSG00000117013	1.091	urn:mavedb:00000094-a-2	KCNQ4
1	40818666	T	G	ENSG00000117013	0.4612	urn:mavedb:00000094-a-2	KCNQ4
1	40818667	A	C	ENSG00000117013	0.6667	urn:mavedb:00000094-a-2	KCNQ4
1	40818667	A	G	ENSG00000117013	1.1023	urn:mavedb:00000094-a-2	KCNQ4
1	40818667	A	T	ENSG00000117013	0.739	urn:mavedb:00000094-a-2	KCNQ4
1	40818669	G	A	ENSG00000117013	1.3705	urn:mavedb:00000094-a-2	KCNQ4
1	40818669	G	C	ENSG00000117013	0.0088	urn:mavedb:00000094-a-2	KCNQ4
1	40818669	G	T	ENSG00000117013	0.7724	urn:mavedb:00000094-a-2	KCNQ4
1	40818670	C	A	ENSG00000117013	0.4693	urn:mavedb:00000094-a-2	KCNQ4
1	40818670	C	G	ENSG00000117013	1.0303	urn:mavedb:00000094-a-2	KCNQ4
1	40818670	C	T	ENSG00000117013	1.1498	urn:mavedb:00000094-a-2	KCNQ4
1	40818672	C	A	ENSG00000117013	1.0521	urn:mavedb:00000094-a-2	KCNQ4
1	40818672	C	G	ENSG00000117013	0.0017	urn:mavedb:00000094-a-2	KCNQ4
1	40818672	C	T	ENSG00000117013	0.2402	urn:mavedb:00000094-a-2	KCNQ4
1	40818673	A	C	ENSG00000117013	-0.0152	urn:mavedb:00000094-a-2	KCNQ4
1	40818673	A	G	ENSG00000117013	-0.0415	urn:mavedb:00000094-a-2	KCNQ4
1	40818673	A	T	ENSG00000117013	-0.0195	urn:mavedb:00000094-a-2	KCNQ4
1	40818674	T	A	ENSG00000117013	0.1562	urn:mavedb:00000094-a-2	KCNQ4
1	40818674	T	G	ENSG00000117013	0.1562	urn:mavedb:00000094-a-2	KCNQ4
1	40818675	A	C	ENSG00000117013	0.6044	urn:mavedb:00000094-a-2	KCNQ4
1	40818675	A	G	ENSG00000117013	0.0836	urn:mavedb:00000094-a-2	KCNQ4
1	40818675	A	T	ENSG00000117013	0.6967	urn:mavedb:00000094-a-2	KCNQ4
1	40818676	G	A	ENSG00000117013	0.6765	urn:mavedb:00000094-a-2	KCNQ4
1	40818676	G	C	ENSG00000117013	0.1621	urn:mavedb:00000094-a-2	KCNQ4
1	40818676	G	T	ENSG00000117013	0.1355	urn:mavedb:00000094-a-2	KCNQ4
1	40818677	C	A	ENSG00000117013	0.6044	urn:mavedb:00000094-a-2	KCNQ4
1	40818677	C	G	ENSG00000117013	0.6044	urn:mavedb:00000094-a-2	KCNQ4
1	40818678	A	C	ENSG00000117013	0.9541	urn:mavedb:00000094-a-2	KCNQ4
1	40818678	A	G	ENSG00000117013	1.193	urn:mavedb:00000094-a-2	KCNQ4
1	40818679	A	C	ENSG00000117013	0.7151	urn:mavedb:00000094-a-2	KCNQ4
1	40818679	A	G	ENSG00000117013	1.2495	urn:mavedb:00000094-a-2	KCNQ4
1	40818679	A	T	ENSG00000117013	0.1755	urn:mavedb:00000094-a-2	KCNQ4
1	40818680	G	C	ENSG00000117013	0.1196	urn:mavedb:00000094-a-2	KCNQ4
1	40818680	G	T	ENSG00000117013	0.1196	urn:mavedb:00000094-a-2	KCNQ4
1	40819347	G	A	ENSG00000117013	0.0286	urn:mavedb:00000094-a-2	KCNQ4
1	40819347	G	C	ENSG00000117013	0.0424	urn:mavedb:00000094-a-2	KCNQ4
1	40819348	A	C	ENSG00000117013	-0.0197	urn:mavedb:00000094-a-2	KCNQ4
1	40819348	A	G	ENSG00000117013	-0.0121	urn:mavedb:00000094-a-2	KCNQ4
1	40819348	A	T	ENSG00000117013	-0.0056	urn:mavedb:00000094-a-2	KCNQ4
1	40819349	G	C	ENSG00000117013	0.039	urn:mavedb:00000094-a-2	KCNQ4
1	40819349	G	T	ENSG00000117013	0.039	urn:mavedb:00000094-a-2	KCNQ4
1	40819350	C	A	ENSG00000117013	0.922	urn:mavedb:00000094-a-2	KCNQ4
1	40819350	C	G	ENSG00000117013	0.1606	urn:mavedb:00000094-a-2	KCNQ4
1	40819351	T	A	ENSG00000117013	0.0159	urn:mavedb:00000094-a-2	KCNQ4
1	40819351	T	C	ENSG00000117013	0.0037	urn:mavedb:00000094-a-2	KCNQ4
1	40819351	T	G	ENSG00000117013	0.0039	urn:mavedb:00000094-a-2	KCNQ4
1	40819353	A	C	ENSG00000117013	0.6768	urn:mavedb:00000094-a-2	KCNQ4
1	40819353	A	G	ENSG00000117013	0.8521	urn:mavedb:00000094-a-2	KCNQ4
1	40819353	A	T	ENSG00000117013	0.6578	urn:mavedb:00000094-a-2	KCNQ4
1	40819354	T	A	ENSG00000117013	0.0595	urn:mavedb:00000094-a-2	KCNQ4
1	40819354	T	C	ENSG00000117013	0.8163	urn:mavedb:00000094-a-2	KCNQ4
1	40819354	T	G	ENSG00000117013	0.6544	urn:mavedb:00000094-a-2	KCNQ4
1	40819355	C	G	ENSG00000117013	0.7886	urn:mavedb:00000094-a-2	KCNQ4
1	40819356	A	C	ENSG00000117013	0.6108	urn:mavedb:00000094-a-2	KCNQ4
1	40819356	A	G	ENSG00000117013	0.5996	urn:mavedb:00000094-a-2	KCNQ4
1	40819356	A	T	ENSG00000117013	1.2336	urn:mavedb:00000094-a-2	KCNQ4
1	40819357	C	A	ENSG00000117013	0.3111	urn:mavedb:00000094-a-2	KCNQ4
1	40819357	C	G	ENSG00000117013	1.2336	urn:mavedb:00000094-a-2	KCNQ4
1	40819357	C	T	ENSG00000117013	0.3563	urn:mavedb:00000094-a-2	KCNQ4
1	40819359	G	A	ENSG00000117013	0.7481	urn:mavedb:00000094-a-2	KCNQ4
1	40819359	G	C	ENSG00000117013	-0.0046	urn:mavedb:00000094-a-2	KCNQ4
1	40819359	G	T	ENSG00000117013	1.1213	urn:mavedb:00000094-a-2	KCNQ4
1	40819360	C	A	ENSG00000117013	0.7686	urn:mavedb:00000094-a-2	KCNQ4
1	40819360	C	G	ENSG00000117013	0.0022	urn:mavedb:00000094-a-2	KCNQ4
1	40819360	C	T	ENSG00000117013	0.0073	urn:mavedb:00000094-a-2	KCNQ4
1	40819362	T	A	ENSG00000117013	0.0017	urn:mavedb:00000094-a-2	KCNQ4
1	40819362	T	C	ENSG00000117013	0.0017	urn:mavedb:00000094-a-2	KCNQ4
1	40819362	T	G	ENSG00000117013	1.6412	urn:mavedb:00000094-a-2	KCNQ4
1	40819363	G	C	ENSG00000117013	1.3359	urn:mavedb:00000094-a-2	KCNQ4
1	40819363	G	T	ENSG00000117013	2.4836	urn:mavedb:00000094-a-2	KCNQ4
1	40819364	G	C	ENSG00000117013	2.761	urn:mavedb:00000094-a-2	KCNQ4
1	40819364	G	T	ENSG00000117013	2.761	urn:mavedb:00000094-a-2	KCNQ4
1	40819365	T	A	ENSG00000117013	0.1701	urn:mavedb:00000094-a-2	KCNQ4
1	40819365	T	C	ENSG00000117013	0.8644	urn:mavedb:00000094-a-2	KCNQ4
1	40819365	T	G	ENSG00000117013	0.007	urn:mavedb:00000094-a-2	KCNQ4
1	40819366	A	C	ENSG00000117013	0.0319	urn:mavedb:00000094-a-2	KCNQ4
1	40819366	A	G	ENSG00000117013	-0.0025	urn:mavedb:00000094-a-2	KCNQ4
1	40819366	A	T	ENSG00000117013	0.4926	urn:mavedb:00000094-a-2	KCNQ4
1	40819368	A	C	ENSG00000117013	0.8574	urn:mavedb:00000094-a-2	KCNQ4
1	40819368	A	G	ENSG00000117013	0.2495	urn:mavedb:00000094-a-2	KCNQ4
1	40819368	A	T	ENSG00000117013	0.6955	urn:mavedb:00000094-a-2	KCNQ4
1	40819369	T	A	ENSG00000117013	0.0713	urn:mavedb:00000094-a-2	KCNQ4
1	40819369	T	C	ENSG00000117013	0.165	urn:mavedb:00000094-a-2	KCNQ4
1	40819369	T	G	ENSG00000117013	0.1502	urn:mavedb:00000094-a-2	KCNQ4
1	40819370	C	G	ENSG00000117013	0.6879	urn:mavedb:00000094-a-2	KCNQ4
1	40819371	G	A	ENSG00000117013	-0.0008	urn:mavedb:00000094-a-2	KCNQ4
1	40819371	G	C	ENSG00000117013	-0.0008	urn:mavedb:00000094-a-2	KCNQ4
1	40819371	G	T	ENSG00000117013	0.7443	urn:mavedb:00000094-a-2	KCNQ4
1	40819372	G	A	ENSG00000117013	0.7833	urn:mavedb:00000094-a-2	KCNQ4
1	40819372	G	C	ENSG00000117013	1.6976	urn:mavedb:00000094-a-2	KCNQ4
1	40819372	G	T	ENSG00000117013	1.526	urn:mavedb:00000094-a-2	KCNQ4
1	40819374	T	A	ENSG00000117013	0.1279	urn:mavedb:00000094-a-2	KCNQ4
1	40819374	T	C	ENSG00000117013	0.0183	urn:mavedb:00000094-a-2	KCNQ4
1	40819374	T	G	ENSG00000117013	0.7998	urn:mavedb:00000094-a-2	KCNQ4
1	40819375	T	A	ENSG00000117013	-0.0061	urn:mavedb:00000094-a-2	KCNQ4
1	40819375	T	C	ENSG00000117013	0.2406	urn:mavedb:00000094-a-2	KCNQ4
1	40819375	T	G	ENSG00000117013	0.0552	urn:mavedb:00000094-a-2	KCNQ4
1	40819376	C	A	ENSG00000117013	0.0183	urn:mavedb:00000094-a-2	KCNQ4
1	40819376	C	G	ENSG00000117013	0.0183	urn:mavedb:00000094-a-2	KCNQ4
1	40819377	C	A	ENSG00000117013	1.5362	urn:mavedb:00000094-a-2	KCNQ4
1	40819377	C	G	ENSG00000117013	1.6745	urn:mavedb:00000094-a-2	KCNQ4
1	40819378	T	A	ENSG00000117013	0.0293	urn:mavedb:00000094-a-2	KCNQ4
1	40819378	T	C	ENSG00000117013	0.0213	urn:mavedb:00000094-a-2	KCNQ4
1	40819378	T	G	ENSG00000117013	0.0294	urn:mavedb:00000094-a-2	KCNQ4
1	40819380	G	A	ENSG00000117013	0.8791	urn:mavedb:00000094-a-2	KCNQ4
1	40819380	G	C	ENSG00000117013	0.5026	urn:mavedb:00000094-a-2	KCNQ4
1	40819380	G	T	ENSG00000117013	0.5026	urn:mavedb:00000094-a-2	KCNQ4
1	40819381	T	A	ENSG00000117013	0.0192	urn:mavedb:00000094-a-2	KCNQ4
1	40819381	T	C	ENSG00000117013	0.7112	urn:mavedb:00000094-a-2	KCNQ4
1	40819381	T	G	ENSG00000117013	0.1284	urn:mavedb:00000094-a-2	KCNQ4
1	40819383	C	A	ENSG00000117013	0.6288	urn:mavedb:00000094-a-2	KCNQ4
1	40819383	C	G	ENSG00000117013	0.8164	urn:mavedb:00000094-a-2	KCNQ4
1	40819383	C	T	ENSG00000117013	0.0819	urn:mavedb:00000094-a-2	KCNQ4
1	40819384	T	A	ENSG00000117013	-0.016	urn:mavedb:00000094-a-2	KCNQ4
1	40819384	T	C	ENSG00000117013	-0.0123	urn:mavedb:00000094-a-2	KCNQ4
1	40819384	T	G	ENSG00000117013	0.0097	urn:mavedb:00000094-a-2	KCNQ4
1	40819386	A	C	ENSG00000117013	0.7703	urn:mavedb:00000094-a-2	KCNQ4
1	40819386	A	G	ENSG00000117013	0.8994	urn:mavedb:00000094-a-2	KCNQ4
1	40819386	A	T	ENSG00000117013	1.0239	urn:mavedb:00000094-a-2	KCNQ4
1	40819387	T	A	ENSG00000117013	-0.0084	urn:mavedb:00000094-a-2	KCNQ4
1	40819387	T	C	ENSG00000117013	0.038	urn:mavedb:00000094-a-2	KCNQ4
1	40819387	T	G	ENSG00000117013	0.0564	urn:mavedb:00000094-a-2	KCNQ4
1	40819388	C	G	ENSG00000117013	0.6881	urn:mavedb:00000094-a-2	KCNQ4
1	40819389	T	A	ENSG00000117013	1.0539	urn:mavedb:00000094-a-2	KCNQ4
1	40819389	T	C	ENSG00000117013	0.9573	urn:mavedb:00000094-a-2	KCNQ4
1	40819389	T	G	ENSG00000117013	0.003	urn:mavedb:00000094-a-2	KCNQ4
1	40819390	T	A	ENSG00000117013	0.8251	urn:mavedb:00000094-a-2	KCNQ4
1	40819390	T	C	ENSG00000117013	1.0339	urn:mavedb:00000094-a-2	KCNQ4
1	40819390	T	G	ENSG00000117013	0.9335	urn:mavedb:00000094-a-2	KCNQ4
1	40819391	C	A	ENSG00000117013	0.9573	urn:mavedb:00000094-a-2	KCNQ4
1	40819391	C	G	ENSG00000117013	0.9573	urn:mavedb:00000094-a-2	KCNQ4
1	40819392	G	A	ENSG00000117013	0.6711	urn:mavedb:00000094-a-2	KCNQ4
1	40819392	G	C	ENSG00000117013	-0.0172	urn:mavedb:00000094-a-2	KCNQ4
1	40819392	G	T	ENSG00000117013	0.6027	urn:mavedb:00000094-a-2	KCNQ4
1	40819393	C	A	ENSG00000117013	0.2061	urn:mavedb:00000094-a-2	KCNQ4
1	40819393	C	G	ENSG00000117013	1.155	urn:mavedb:00000094-a-2	KCNQ4
1	40819393	C	T	ENSG00000117013	0.2125	urn:mavedb:00000094-a-2	KCNQ4
1	40819395	T	A	ENSG00000117013	0.6997	urn:mavedb:00000094-a-2	KCNQ4
1	40819395	T	C	ENSG00000117013	-0.0571	urn:mavedb:00000094-a-2	KCNQ4
1	40819395	T	G	ENSG00000117013	0.4639	urn:mavedb:00000094-a-2	KCNQ4
1	40819396	C	A	ENSG00000117013	-0.0036	urn:mavedb:00000094-a-2	KCNQ4
1	40819396	C	G	ENSG00000117013	1.0302	urn:mavedb:00000094-a-2	KCNQ4
1	40819396	C	T	ENSG00000117013	-0.0031	urn:mavedb:00000094-a-2	KCNQ4
1	40819398	T	A	ENSG00000117013	0.0798	urn:mavedb:00000094-a-2	KCNQ4
1	40819398	T	C	ENSG00000117013	0.305	urn:mavedb:00000094-a-2	KCNQ4
1	40819398	T	G	ENSG00000117013	0.2991	urn:mavedb:00000094-a-2	KCNQ4
1	40819399	T	A	ENSG00000117013	0.6614	urn:mavedb:00000094-a-2	KCNQ4
1	40819399	T	C	ENSG00000117013	0.665	urn:mavedb:00000094-a-2	KCNQ4
1	40819399	T	G	ENSG00000117013	0.0364	urn:mavedb:00000094-a-2	KCNQ4
1	40819400	C	A	ENSG00000117013	0.305	urn:mavedb:00000094-a-2	KCNQ4
1	40819400	C	G	ENSG00000117013	0.305	urn:mavedb:00000094-a-2	KCNQ4
1	40819401	C	A	ENSG00000117013	0.83	urn:mavedb:00000094-a-2	KCNQ4
1	40819401	C	G	ENSG00000117013	1.0681	urn:mavedb:00000094-a-2	KCNQ4
1	40819402	T	A	ENSG00000117013	-0.0492	urn:mavedb:00000094-a-2	KCNQ4
1	40819402	T	C	ENSG00000117013	0.0014	urn:mavedb:00000094-a-2	KCNQ4
1	40819402	T	G	ENSG00000117013	-0.0104	urn:mavedb:00000094-a-2	KCNQ4
1	40819404	G	A	ENSG00000117013	-0.0161	urn:mavedb:00000094-a-2	KCNQ4
1	40819404	G	C	ENSG00000117013	0.7375	urn:mavedb:00000094-a-2	KCNQ4
1	40819404	G	T	ENSG00000117013	-0.022	urn:mavedb:00000094-a-2	KCNQ4
1	40819405	T	A	ENSG00000117013	-0.0282	urn:mavedb:00000094-a-2	KCNQ4
1	40819405	T	C	ENSG00000117013	-0.0048	urn:mavedb:00000094-a-2	KCNQ4
1	40819405	T	G	ENSG00000117013	-0.0038	urn:mavedb:00000094-a-2	KCNQ4
1	40819407	T	A	ENSG00000117013	0.1916	urn:mavedb:00000094-a-2	KCNQ4
1	40819407	T	C	ENSG00000117013	0.7217	urn:mavedb:00000094-a-2	KCNQ4
1	40819407	T	G	ENSG00000117013	0.0001	urn:mavedb:00000094-a-2	KCNQ4
1	40819408	A	C	ENSG00000117013	0.0598	urn:mavedb:00000094-a-2	KCNQ4
1	40819408	A	G	ENSG00000117013	0.0229	urn:mavedb:00000094-a-2	KCNQ4
1	40819408	A	T	ENSG00000117013	0.7443	urn:mavedb:00000094-a-2	KCNQ4
1	40819410	C	A	ENSG00000117013	1.0335	urn:mavedb:00000094-a-2	KCNQ4
1	40819410	C	G	ENSG00000117013	0.8043	urn:mavedb:00000094-a-2	KCNQ4
1	40819411	T	A	ENSG00000117013	0.8312	urn:mavedb:00000094-a-2	KCNQ4
1	40819411	T	C	ENSG00000117013	0.0032	urn:mavedb:00000094-a-2	KCNQ4
1	40819411	T	G	ENSG00000117013	-0.002	urn:mavedb:00000094-a-2	KCNQ4
1	40819413	G	A	ENSG00000117013	0.3817	urn:mavedb:00000094-a-2	KCNQ4
1	40819413	G	C	ENSG00000117013	0.0021	urn:mavedb:00000094-a-2	KCNQ4
1	40819413	G	T	ENSG00000117013	0.5946	urn:mavedb:00000094-a-2	KCNQ4
1	40819414	C	A	ENSG00000117013	-0.0159	urn:mavedb:00000094-a-2	KCNQ4
1	40819414	C	G	ENSG00000117013	-0.0022	urn:mavedb:00000094-a-2	KCNQ4
1	40819414	C	T	ENSG00000117013	1.0502	urn:mavedb:00000094-a-2	KCNQ4
1	40819416	G	A	ENSG00000117013	-0.0078	urn:mavedb:00000094-a-2	KCNQ4
1	40819416	G	C	ENSG00000117013	-0.003	urn:mavedb:00000094-a-2	KCNQ4
1	40819417	A	C	ENSG00000117013	0.0103	urn:mavedb:00000094-a-2	KCNQ4
1	40819417	A	G	ENSG00000117013	0.0078	urn:mavedb:00000094-a-2	KCNQ4
1	40819417	A	T	ENSG00000117013	-0.0173	urn:mavedb:00000094-a-2	KCNQ4
1	40819418	G	C	ENSG00000117013	0.0135	urn:mavedb:00000094-a-2	KCNQ4
1	40819418	G	T	ENSG00000117013	0.0135	urn:mavedb:00000094-a-2	KCNQ4
1	40819419	A	C	ENSG00000117013	0.3377	urn:mavedb:00000094-a-2	KCNQ4
1	40819419	A	G	ENSG00000117013	0.3837	urn:mavedb:00000094-a-2	KCNQ4
1	40819420	A	C	ENSG00000117013	0.9424	urn:mavedb:00000094-a-2	KCNQ4
1	40819420	A	G	ENSG00000117013	0.0873	urn:mavedb:00000094-a-2	KCNQ4
1	40819420	A	T	ENSG00000117013	0.2274	urn:mavedb:00000094-a-2	KCNQ4
1	40819421	G	C	ENSG00000117013	0.8158	urn:mavedb:00000094-a-2	KCNQ4
1	40819421	G	T	ENSG00000117013	0.8158	urn:mavedb:00000094-a-2	KCNQ4
1	40819422	G	A	ENSG00000117013	1.0214	urn:mavedb:00000094-a-2	KCNQ4
1	40819422	G	C	ENSG00000117013	0.6656	urn:mavedb:00000094-a-2	KCNQ4
1	40819422	G	T	ENSG00000117013	-0.0313	urn:mavedb:00000094-a-2	KCNQ4
1	40819423	A	C	ENSG00000117013	-0.0202	urn:mavedb:00000094-a-2	KCNQ4
1	40819423	A	G	ENSG00000117013	0.8261	urn:mavedb:00000094-a-2	KCNQ4
1	40819423	A	T	ENSG00000117013	-0.0035	urn:mavedb:00000094-a-2	KCNQ4
1	40819424	C	A	ENSG00000117013	0.9047	urn:mavedb:00000094-a-2	KCNQ4
1	40819424	C	G	ENSG00000117013	0.9047	urn:mavedb:00000094-a-2	KCNQ4
1	40819425	G	A	ENSG00000117013	1.2204	urn:mavedb:00000094-a-2	KCNQ4
1	40819425	G	C	ENSG00000117013	-0.0083	urn:mavedb:00000094-a-2	KCNQ4
1	40819425	G	T	ENSG00000117013	0.9431	urn:mavedb:00000094-a-2	KCNQ4
1	40819426	C	A	ENSG00000117013	0.6933	urn:mavedb:00000094-a-2	KCNQ4
1	40819426	C	G	ENSG00000117013	0.6886	urn:mavedb:00000094-a-2	KCNQ4
1	40819426	C	T	ENSG00000117013	0.9333	urn:mavedb:00000094-a-2	KCNQ4
1	40819428	A	C	ENSG00000117013	0.1506	urn:mavedb:00000094-a-2	KCNQ4
1	40819428	A	G	ENSG00000117013	0.2541	urn:mavedb:00000094-a-2	KCNQ4
1	40819428	A	T	ENSG00000117013	-0.0087	urn:mavedb:00000094-a-2	KCNQ4
1	40819429	A	C	ENSG00000117013	0.1154	urn:mavedb:00000094-a-2	KCNQ4
1	40819429	A	G	ENSG00000117013	0.1861	urn:mavedb:00000094-a-2	KCNQ4
1	40819429	A	T	ENSG00000117013	0.0039	urn:mavedb:00000094-a-2	KCNQ4
1	40819430	C	A	ENSG00000117013	0.0114	urn:mavedb:00000094-a-2	KCNQ4
1	40819430	C	G	ENSG00000117013	0.0114	urn:mavedb:00000094-a-2	KCNQ4
[truncated: 170,932 more rows]

## Sheet: Supplementary Table 7
#Supplementary Table 7. Benchmarking results of 53 tools evaulated on the MAVE data.
Tool	Mean_R2	BAP1_literature(PMID:38969833)	https://doi.org/10.1038/s41586-024-08349-1	https://pmc.ncbi.nlm.nih.gov/articles/PMC7704534/	tmp:0e8e16de-f096	tmp:419a43d5-46fb	tmp:7b97b5fa-fcc2	tmp:814e028b-6081	tmp:aed41649-d55f	tmp:d5964b04-ba98	tmp:d624e093-ac9b	tmp:e3804ea9-ee09	tmp:ec0eb518-1405	tmp:fad00eff-64ab	tmp:fcbc9b4b-298f	tmp:fcdaf202-368a	urn:mavedb:00000001-a	urn:mavedb:00000001-b	urn:mavedb:00000001-c	urn:mavedb:00000001-d	urn:mavedb:00000003-b-1	urn:mavedb:00000005-a-1	urn:mavedb:00000013-b-1	urn:mavedb:00000017-a-1	urn:mavedb:00000031-a-1	urn:mavedb:00000035-a-1	urn:mavedb:00000036-a-2	urn:mavedb:00000043-a-1	urn:mavedb:00000045-l-1	urn:mavedb:00000046-a-2	urn:mavedb:00000047-a-1	urn:mavedb:00000048-c-1	urn:mavedb:00000049-a-1	urn:mavedb:00000050-a-1	urn:mavedb:00000053-a-1	urn:mavedb:00000055-b-1	urn:mavedb:00000058-a-1	urn:mavedb:00000060-a-2	urn:mavedb:00000062-b-1	urn:mavedb:00000065-a-1	urn:mavedb:00000066-a-1	urn:mavedb:00000067-a-1	urn:mavedb:00000068-b-1	urn:mavedb:00000069-a-1	urn:mavedb:00000078-b-1	urn:mavedb:00000083-a-1	urn:mavedb:00000091-a-1	urn:mavedb:00000094-a-2	urn:mavedb:00000095-b-1
FuncVEP_CTI	0.257217	0.541438	0.163453	0.534041	0.550691	0.273681	0.512047	0.380984	NA	0.180744	0.618893	0.391937	0.350308	0.203257	0.400209	0.244468	0.138217	0.397975	0.039599	0.0659552	0.0221581	0.310551	0.381843	0.282857	NA	0.245366	0.116099	0.096626	0.163717	0.0426625	0.0584339	0.0364789	0.371219	0.251518	0.0864462	0.382747	0.315517	0.342109	0.327978	0.0334108	0.098558	0.0857966	0.211021	0.149405	0.349224	0.130686	0.0847753	0.0509094	0.276965
FuncVEP_CTE	0.247873	0.552359	0.161668	0.308897	0.594653	0.300627	0.0165634	0.409107	NA	0.211541	0.606504	0.313346	0.365496	0.223744	0.446132	0.213749	0.0871184	0.393106	0.0650057	0.0719136	0.016833	0.32546	0.411768	0.220552	NA	0.234622	0.0708796	0.142283	0.12211	0.0797027	0.0712191	0.0314096	0.381003	0.25019	0.0597066	0.523352	0.124134	0.243554	0.482568	0.0361417	0.0892795	0.0943025	0.200887	0.135911	0.376671	0.144324	0.0470061	0.0499243	0.542186
FuncVEP_SP	0.242644	0.552306	0.129799	0.464939	0.537164	0.258846	0.396934	0.389425	NA	0.172025	0.482358	0.472621	0.402075	0.200274	0.453611	0.125279	0.10108	0.360103	0.101507	0.0564608	0.0218703	0.313832	0.413828	0.211349	NA	0.220293	0.0344287	0.179101	0.135041	0.0483065	0.0638204	0.0312124	0.356242	0.202435	0.0631364	0.493374	0.057157	0.277362	0.38572	0.0229955	0.0650984	0.0824261	0.186979	0.133649	0.35387	0.095869	0.0715134	0.0568196	0.500687
PAI3D_score	0.236255	0.349756	0.144734	0.325777	0.479766	0.322965	0.324403	0.152269	NA	0.148648	0.475994	0.443706	0.29352	NA	0.392691	NA	NA	0.381344	0.0808703	0.0573237	NA	NA	0.304286	0.427879	NA	0.0593252	0.00513598	0.144867	NA	0.130059	0.0596072	NA	0.0995702	0.302196	NA	0.383638	0.139239	0.0723946	0.371148	0.0148912	0.0923132	NA	0.229305	NA	0.338394	NA	0.157875	0.16507	0.458437
VARITY_R_LOO_score	0.235157	0.44124	NA	0.511005	0.435409	0.277325	0.279268	0.242606	NA	0.143716	0.232399	0.388296	0.260524	0.14213	0.370261	NA	NA	0.529018	NA	NA	0.00227307	0.449798	NA	0.25001	NA	0.302152	0.0230109	0.0956915	0.208313	0.0733113	0.0611007	0.0253077	0.337463	0.210031	0.0668985	0.386471	0.108794	0.0748436	NA	NA	NA	NA	0.150885	0.0841359	0.221971	NA	0.0488135	0.139958	0.42077
VARITY_R_score	0.235157	0.44124	NA	0.511005	0.435409	0.277325	0.279268	0.242606	NA	0.143716	0.232399	0.388296	0.260524	0.14213	0.370261	NA	NA	0.529018	NA	NA	0.00227307	0.449798	NA	0.25001	NA	0.302152	0.0230109	0.0956915	0.208313	0.0733113	0.0611007	0.0253077	0.337463	0.210031	0.0668985	0.386471	0.108794	0.0748436	NA	NA	NA	NA	0.150885	0.0841359	0.221971	NA	0.0488135	0.139958	0.42077
VARITY_ER_LOO_score	0.234801	0.433742	NA	0.512239	0.452327	0.25776	0.376678	0.238263	NA	0.151019	0.167819	0.372527	0.242389	0.147992	0.382583	NA	NA	0.403575	NA	NA	0.0014318	0.47036	NA	0.147051	NA	0.271665	0.0218589	0.0757059	0.246545	0.0832652	0.0642608	0.0209812	0.458919	0.184227	0.0732272	0.358979	0.16328	0.17947	NA	NA	NA	NA	0.16009	0.0917786	0.217856	NA	0.078087	0.136394	0.41797
VARITY_ER_score	0.234801	0.433742	NA	0.512239	0.452327	0.25776	0.376678	0.238263	NA	0.151019	0.167819	0.372527	0.242389	0.147992	0.382583	NA	NA	0.403575	NA	NA	0.0014318	0.47036	NA	0.147051	NA	0.271665	0.0218589	0.0757059	0.246545	0.0832652	0.0642608	0.0209812	0.458919	0.184227	0.0732272	0.358979	0.16328	0.17947	NA	NA	NA	NA	0.16009	0.0917786	0.217856	NA	0.078087	0.136394	0.41797
ESM1v	0.234237	0.426621	NA	0.346887	0.45279	0.247554	0.296563	0.215997	NA	0.034464	NA	NA	0.319729	NA	0.401895	0.225611	0.167779	0.37305	NA	0.049874	0.0453045	0.280281	0.319684	0.535117	NA	0.0848593	0.0472218	0.148749	0.276081	NA	0.0696292	0.0361722	0.176317	0.255	NA	0.528205	0.131756	0.150847	0.399611	0.0136755	0.106893	0.0677555	0.236314	NA	0.331955	NA	0.244929	0.155156	0.469236
glm_CaddDeogenRevel	0.233937	0.412304	NA	NA	0.346277	0.187323	NA	NA	NA	0.18826	0.215089	0.718207	0.0783803	NA	0.446296	0.026992	0.362181	0.647982	NA	0.137208	0.0759249	0.21628	0.350776	NA	NA	0.0972064	0.0628692	0.405156	0.21491	0.482222	0.0499845	0.0541163	0.299108	0.16267	0.313297	0.256679	0.152976	0.387576	NA	0.1322	0.127757	0.0748519	0.32138	0.222544	0.245701	NA	NA	0.117806	0.375344
ClinVEP_SP	0.229578	0.417493	0.152701	0.368574	0.540817	0.24467	0.0635566	0.39786	NA	0.13419	0.538017	0.424188	0.397857	0.19816	0.419115	0.135402	0.119097	0.335665	0.0880359	0.0676467	0.0202346	0.223686	0.371117	0.23089	NA	0.197619	0.0425665	0.181058	0.115764	0.0538697	0.0672301	0.0222029	0.256976	0.217271	0.0740866	0.460621	0.0602575	0.210935	0.43159	0.0316305	0.071755	0.0750825	0.211161	0.17694	0.393785	0.0860995	0.0320956	0.208389	0.539073
popEVE	0.224984	0.434093	NA	0.274026	0.503168	0.27053	0.26018	0.109399	NA	0.0829366	NA	NA	0.328137	NA	0.403747	0.254172	0.186179	0.411055	NA	0.0465444	0.0204414	0.0900048	0.317386	0.219873	NA	0.131151	0.0416145	0.136338	0.280697	NA	0.074962	0.0359955	0.172345	0.272291	NA	0.500483	0.13298	0.114747	0.429972	0.0143426	0.12037	0.0759466	0.222822	NA	0.333302	NA	0.226096	0.157822	0.501624
ClinVEP_CTE	0.207445	0.187383	0.173796	0.242354	0.537468	0.290644	0.0531597	0.427564	NA	0.173948	0.393101	0.217777	0.3322	0.242284	0.407123	0.0137287	0.145355	0.368686	0.0459119	0.0453381	0.0213698	0.282457	0.325056	0.243528	NA	0.16043	0.0296195	0.113076	0.144978	0.0482369	0.071735	0.0240054	0.148608	0.233878	0.0612571	0.514367	0.0503829	0.0563678	0.433525	0.0265604	0.0611301	0.0506342	0.195342	0.146934	0.327974	0.125792	0.0495775	0.165491	0.506818
AlphaMissense_score	0.204824	0.285192	0.152927	0.363233	0.486449	0.310396	0.145292	NA	NA	0.22195	0.487712	NA	0.321624	0.235337	NA	0.0331599	NA	0.382493	NA	0.0540079	0.0475711	NA	0.335964	0.364665	NA	0.132844	0.0263047	0.189355	NA	0.0441657	0.0517694	0.0180409	0.108554	0.247564	0.0810878	0.464448	0.14107	0.128677	0.394075	0.0137369	0.103254	0.0762429	0.254618	0.0656632	0.275862	0.141847	0.0140394	0.13672	0.390598
sigma_score	0.203868	0.282311	NA	0.340548	0.380943	0.253885	0.411203	0.203956	NA	0.147892	0.283899	0.348044	0.41458	0.108141	0.127245	0.258655	NA	NA	0.0449935	0.0426554	0.0299623	0.203123	NA	0.100293	NA	NA	0.00961718	0.0505089	0.135743	NA	NA	NA	0.0944185	0.183516	NA	NA	0.0855905	0.0490621	NA	NA	0.0826138	0.0778137	0.241391	NA	0.216312	NA	0.127217	0.113623	0.33416
CADD_raw	0.19787	0.411303	0.107787	0.30725	0.44625	0.223153	0.291862	0.381831	NA	0.132878	0.307927	0.320774	0.185147	0.173933	0.3934	0.105273	0.0617024	0.132134	0.333869	0.0647174	0.0137069	0.20978	0.282631	0.395849	NA	0.137095	0.320986	0.0975288	0.0963429	0.0525658	0.0710901	0.0267269	0.23852	0.125583	0.0456753	0.291219	0.351096	0.312825	0.257633	0.165108	0.0852072	0.0732209	0.158074	0.137393	0.178963	0.107842	0.082218	0.0864547	0.404815
glm_DeogenRevel	0.197656	0.429811	NA	0.270913	0.43465	0.277572	0.410785	NA	NA	0.183583	0.208845	0.403291	0.258158	NA	0.397674	0.141613	0.124118	0.423873	NA	0.0458709	0.0312645	0.263135	0.310336	NA	NA	0.080106	0.0170828	0.0737422	0.103404	0.125978	0.0592191	0.0238015	0.246909	0.167819	0.0768238	0.43761	0.075385	0.0898376	NA	0.0175059	0.0783981	0.0507831	0.165234	0.0868282	0.18727	NA	0.0720771	0.134936	0.341065
glm_AlphRevelCadd	0.195514	0.439753	NA	0.29815	0.387723	0.257213	0.172288	NA	NA	0.144222	0.240421	0.286333	0.310555	NA	0.375846	0.253587	0.115277	0.379273	0.699791	0.0572641	0.02681	0.240185	0.346761	NA	NA	0.0818778	0.0149185	0.0479846	0.113362	0.10316	0.0577123	0.0331783	0.227583	0.164932	0.0513838	0.269586	0.108313	0.156596	NA	0.0101071	0.0830881	0.0473733	0.150506	0.0743893	0.226211	NA	0.109743	0.110891	0.351231
ESM1b_score	0.195398	0.345082	0.156812	0.416118	0.429222	0.245384	0.310346	0.219923	NA	0.0727386	0.264689	0.208854	0.303277	0.157642	0.211495	0.232818	0.0888022	0.234487	0.0756369	0.0429951	0.0277468	0.205982	0.337159	0.345996	NA	0.0815861	0.0464964	0.112499	0.262817	0.0773793	0.0566959	0.0333913	0.22835	0.166394	0.11642	0.387832	0.144151	0.0766522	0.297166	0.00914745	0.0770854	0.0536943	0.234104	0.0695742	0.310402	0.152411	0.0536816	0.102801	0.344217
DEOGEN2_score	0.193604	0.432936	0.110747	0.232657	0.332897	0.194336	0.406185	0.159776	NA	0.144309	0.328694	0.252843	0.240569	0.152169	0.381078	NA	0.129825	0.345676	NA	0.0335977	0.0267566	0.252202	0.292978	0.187918	NA	0.282591	0.0310868	0.0458759	0.0721878	0.0651183	0.0576523	0.0251309	0.314699	0.180577	0.0437502	0.308329	0.0856746	0.0873364	0.31551	0.023845	0.0805041	0.0355742	0.214072	0.0872652	0.295025	NA	0.127323	0.107456	0.363155
glm_RevelCadd	0.192738	0.404883	NA	0.355751	0.446393	0.28761	0.332653	NA	NA	0.176932	0.184316	0.400883	0.237605	NA	0.395717	0.251218	0.127969	0.379108	0.0374997	0.0584569	0.0337557	0.247902	0.289944	NA	NA	0.0785603	0.00838112	0.0591892	0.105536	0.103618	0.0651928	0.0218231	0.199099	0.160142	0.073327	0.429874	0.0774216	0.0668337	NA	0.0190133	0.0668477	0.0461379	0.145023	0.0922742	0.17338	NA	0.0868278	0.127436	0.345804
glm_AlphDeogenRevel	0.192254	0.442977	NA	0.235481	0.428047	0.288797	0.463054	NA	NA	0.177326	0.192598	0.328987	0.245547	NA	0.402116	0.328542	0.136843	0.311642	NA	0.0464471	0.0256637	0.246256	0.309457	NA	NA	0.0733904	0.0109117	0.0393845	0.10412	0.0571667	0.080135	0.0227755	0.169643	0.170406	0.0854416	0.396607	0.0722943	0.0675539	NA	0.00906709	0.0609249	0.0310165	0.17663	0.0749004	0.17726	NA	0.1109	0.108021	0.391387
EVH_epistatic	0.191135	0.186745	NA	NA	0.377519	0.281006	NA	0.0514057	NA	0.207874	NA	NA	0.261604	NA	0.353648	0.348794	0.131133	0.153302	NA	NA	NA	0.226929	0.217513	0.20965	NA	NA	0.0164465	0.128256	0.187762	NA	0.0531962	0.020762	0.154095	NA	NA	NA	NA	0.0580471	NA	0.0123732	0.0819956	0.0543811	0.165539	NA	0.287506	NA	NA	0.14485	0.420371
glm_AlphCadd	0.190985	0.404076	NA	0.23008	0.441034	0.278172	0.198135	NA	NA	0.170772	0.325604	0.414702	0.277911	NA	0.343725	0.164143	0.118855	0.408436	0.0340035	0.0470788	0.030823	0.248757	0.29628	NA	NA	0.0707652	0.0121105	0.0921703	0.105083	0.111243	0.0606318	0.0203131	0.207011	0.15094	0.0669006	0.361578	0.121015	0.0975644	NA	0.0304281	0.0744275	0.0441552	0.173098	0.0846971	0.170429	NA	0.133855	0.136052	0.324665
EWSIM	0.186855	0.194998	NA	0.205373	0.405337	0.25478	0.527401	0.0611426	NA	0.150246	NA	NA	0.249701	NA	0.337934	0.298337	0.143834	0.390556	NA	0.0460744	0.0151031	0.254579	0.277377	0.161799	NA	0.24607	0.010322	0.0846578	0.102883	NA	0.0819289	0.0290103	0.113243	0.238302	NA	NA	0.121365	0.0202455	NA	0.0136763	0.0888067	0.0719769	0.188462	NA	0.282212	NA	0.0617999	0.15199	0.434057
MPC_score	0.186709	0.284531	NA	0.40626	0.41199	0.294178	0.150736	NA	NA	0.123037	0.280998	NA	0.254206	NA	NA	NA	NA	0.363227	0.0645026	0.034734	NA	0.268481	0.295548	0.0666966	NA	0.0728463	0.0157394	0.163403	NA	0.133424	NA	NA	NA	0.0778749	NA	0.277797	0.189121	0.152077	0.296419	0.0270111	0.0798649	0.0347758	0.135454	NA	0.204286	NA	NA	0.0914761	0.347942
glm_CaddDeogen	0.186047	0.404517	NA	0.275334	0.405671	0.248267	0.327293	NA	NA	0.197	0.314658	0.367082	0.222911	NA	0.390962	0.0909686	0.122842	0.418088	NA	0.0360648	0.0246144	0.24582	0.275978	NA	NA	0.0811914	0.0101562	0.052213	0.0951865	0.0767429	0.0556282	0.0197769	0.26524	0.137745	0.070295	0.36106	0.156334	0.0735871	NA	0.0248219	0.0720746	0.0369343	0.172683	0.0813168	0.193011	NA	0.174774	0.1296	0.324739
VEST4_score	0.185144	0.316961	0.132357	0.454419	0.180145	0.215564	0.503382	0.197278	NA	0.16491	0.433718	NA	0.281427	0.128907	0.334721	0.253825	0.0806534	0.329823	0.0709935	0.04981	0.0141999	0.239413	0.348814	0.153007	NA	0.132153	0.0147452	0.12777	0.0850848	0.0725769	0.0585071	0.0199251	0.137987	0.123903	0.0595618	0.340284	0.0353782	0.157332	0.255573	0.0270343	0.0779337	0.0585625	0.186089	0.127966	0.37099	NA	NA	0.131524	0.411091
ClinVEP_CTI	0.182598	0.263149	0.145719	0.359921	0.407964	0.259195	0.0994609	0.238858	NA	0.174132	0.298584	0.116798	0.288941	0.13798	0.357256	0.0297232	0.104626	0.364242	0.0656706	0.0374444	0.0269861	0.230633	0.317503	0.367909	NA	0.162643	0.0103645	0.0804259	0.0660424	0.0730778	0.0699635	0.0227906	0.0999255	0.248514	0.0418572	0.400915	0.088421	0.27457	0.273046	0.021883	0.0391031	0.0398482	0.203409	0.0812569	0.236454	0.191357	0.0715275	0.152567	0.42366
EVH_independent	0.180517	0.16978	NA	NA	0.353933	0.261116	NA	0.0551058	NA	0.134571	NA	NA	0.19975	NA	0.277694	0.306392	0.122672	0.37935	NA	NA	NA	0.170552	0.283401	0.211259	NA	NA	0.0149437	0.138026	0.124519	NA	0.0699341	0.0252289	0.115064	NA	NA	NA	NA	0.0656885	NA	0.0221576	0.0871195	0.0636009	0.122776	NA	0.303974	NA	NA	0.1378	0.377899
REVEL_score	0.177954	0.362319	0.104054	0.306276	0.396386	0.248612	0.422198	0.192478	NA	0.188567	0.174545	NA	0.174347	0.15953	0.379636	0.104878	0.119374	0.411677	0.0254529	0.0385385	0.0352452	0.235937	0.266651	0.526899	NA	0.0675389	0.014484	0.0595753	0.112761	0.0815156	0.054088	0.0239951	0.261802	0.143292	0.0832344	0.392342	0.158636	0.0645146	0.331916	0.0296574	0.0656052	0.0506822	0.144621	0.0754136	0.182578	NA	NA	0.129502	0.300747
MetaRNN_score	0.176543	0.411761	0.114566	0.285098	0.38162	0.238938	0.0747655	0.266646	NA	0.137165	0.275982	0.443576	0.237675	0.145001	0.305505	0.178248	0.136605	0.371867	0.0422453	0.0384926	0.0310235	0.243819	0.273549	0.430134	NA	0.192371	0.0110439	0.0542541	0.101957	0.0874891	0.0519745	0.013928	0.21406	0.136884	0.084747	0.363896	0.0134623	0.0778839	0.381827	0.0166823	0.0767033	0.0521364	0.159278	0.0978942	0.224324	NA	0.0776648	0.116121	0.373939
glm_AlphCaddDeogen	0.176068	0.404857	NA	0.349143	0.424473	0.266532	0.265574	NA	NA	0.194375	0.218741	0.358353	0.169231	NA	0.396808	0.122779	0.134177	0.393839	NA	0.0424877	0.0186379	0.238158	0.269303	NA	NA	0.0835353	0.00675241	0.0714435	0.0986711	0.0657344	0.0632888	0.020388	0.227701	0.15095	0.057853	0.378155	0.14591	0.0760877	NA	0.0138041	0.0590284	0.0345218	0.150802	0.0781957	0.182401	NA	0.128906	0.106697	0.344858
glm_AlphRevel	0.174333	0.375108	NA	0.380821	0.407128	0.264235	0.373146	NA	NA	0.193601	0.194553	0.374137	0.167017	NA	0.398166	0.116747	0.125251	0.374271	0.0324656	0.0491531	0.0288417	0.230658	0.265398	NA	NA	0.0754806	0.00913001	0.0527538	0.0940386	0.0779432	0.0632277	0.021748	0.214542	0.145152	0.0706726	0.396804	0.111362	0.050376	NA	0.0286178	0.0565291	0.0399419	0.161912	0.0784838	0.171869	NA	0.178455	0.110702	0.321165
MutationAssessor_score	0.173875	0.404625	0.0733088	0.264479	0.326051	0.18705	0.202347	0.102967	NA	0.107476	0.318245	0.351277	0.26925	NA	0.213459	0.289641	0.16336	0.354294	NA	0.0448032	0.0403505	0.175482	0.241603	0.0134325	NA	0.258502	0.0307118	0.044073	0.0695382	0.0649957	0.0716954	0.0256408	0.202871	0.151422	0.0501547	0.319952	0.0650462	0.0606054	0.431253	0.0072259	0.078639	0.0658733	0.172131	0.0703087	0.210848	NA	0.150131	0.10138	0.390464
glm_AlphDeogen	0.173738	0.426499	NA	0.264864	0.375862	0.235002	0.411977	NA	NA	0.172676	0.260285	0.24722	0.195278	NA	0.381016	0.136667	0.133785	0.239406	NA	0.037565	0.0134747	0.222216	0.264995	NA	NA	0.121925	0.0146449	0.0482864	0.0813145	0.0508186	0.0743256	0.0181916	0.1747	0.170768	0.0494898	0.32072	0.0711302	0.143459	NA	0.0114002	0.0449308	0.0241531	0.221311	0.0742296	0.169436	NA	0.0947748	0.0842612	0.323177
MutScore_score	0.173477	0.358736	0.0888386	0.248074	0.377858	0.280918	0.11437	0.177435	NA	0.143181	0.24835	0.299156	0.207943	0.148985	0.321689	0.403707	0.113819	0.30631	0.0381943	0.0458705	0.0260927	0.279548	0.262616	0.0562632	NA	0.113794	0.0105321	0.0596251	0.147502	0.0369578	0.0440278	0.0206565	0.114849	0.146075	0.0632443	0.353677	0.0741946	0.0486238	0.290219	0.00900128	0.0662222	0.0313349	0.157127	0.0593706	0.187109	0.293012	0.104213	0.158778	0.372331
PROVEAN_score	0.17031	0.322004	0.0399483	0.322582	0.320596	0.225777	0.40191	0.184767	NA	0.11402	0.307916	NA	0.274354	0.160143	0.381357	0.176544	0.109037	0.250438	0.0327717	0.0413886	0.0202934	0.22335	0.220996	0.141177	NA	0.120934	0.0154047	0.1095	0.104074	0.0807646	0.0331905	0.0217487	0.0891742	0.116231	0.0222595	0.285855	0.151423	0.0965186	0.250605	0.0231168	0.0520178	0.048084	0.190191	0.0851235	0.216914	NA	NA	0.106226	0.243598
PHACT	0.168977	0.307708	NA	0.128568	0.381326	0.208003	0.647497	0.13734	NA	0.131536	0.313917	NA	NA	NA	0.297609	0.00271879	0.119729	0.193606	0.0333008	0.0443028	0.0394279	0.297344	0.242867	0.251222	NA	0.18802	0.0136268	0.0922935	0.0863727	0.0900844	0.0501084	0.0229934	0.120643	0.14705	0.041797	0.360861	0.0816934	0.0788609	NA	0.0295249	NA	0.0489466	0.148795	NA	0.170671	NA	0.185613	0.0801889	0.368525
MutPred_score	0.164304	0.353027	0.0656754	0.197023	0.267633	0.164718	0.633817	0.27582	NA	0.0748956	0.199229	0.407982	0.189938	0.0979016	0.121757	0.0996378	0.0845168	0.339966	NA	0.0316271	0.0366913	0.16122	0.215311	0.0712221	NA	0.236629	0.0199685	0.0909044	0.0432286	0.0556197	0.0532226	0.0228789	0.175232	0.0986414	0.0701143	0.269998	0.0491387	0.0600971	0.277058	0.013713	0.0615955	0.326252	0.149143	0.0646564	0.176867	NA	0.228632	0.0748907	0.289454
ClinPred_score	0.161768	0.344867	0.084207	0.311728	0.342344	0.23936	0.298262	0.168999	NA	0.0976937	0.24087	0.308376	0.214291	0.154819	0.313183	0.341892	0.109602	0.347316	0.0190398	0.0356538	0.0198208	0.241866	0.255292	0.155569	NA	0.126385	0.00824671	0.102592	0.103143	0.0469091	0.0542139	0.021291	0.0871686	0.108071	0.0482826	0.319146	0.0452631	0.0669072	0.276162	0.0128009	0.0685085	0.0490433	0.192404	0.062117	0.177814	0.131551	0.0688734	0.0973359	0.305789
MetaSVM_score	0.159937	0.317536	0.0972323	0.146554	0.313304	0.227215	0.254679	0.105484	NA	0.146973	0.0601605	0.258457	0.130593	0.132415	0.318925	0.303408	0.14368	0.421805	0.0241924	0.0541163	0.0115134	0.175557	0.23011	0.345295	NA	0.104568	0.0222175	0.0826483	0.0530426	0.0848554	0.0657255	0.0250996	0.310595	0.112654	0.0744	0.239756	0.0384574	0.0122249	0.235343	0.0275542	0.0649354	0.0484457	0.0773082	0.0886081	0.190386	0.33058	0.259838	0.0436423	0.256266
MetaLR_score	0.159532	0.272256	0.0869989	0.0822982	0.291408	0.221155	0.201386	0.0865371	NA	0.136709	0.145676	0.180252	0.114842	0.123815	0.283269	0.368399	0.135262	0.383414	0.027962	0.0422098	0.0305695	0.186081	0.239059	0.404349	NA	0.127557	0.0178216	0.0915623	0.046788	0.0942705	0.0588314	0.0184093	0.32427	0.117595	0.0792994	0.24757	0.129214	0.0307612	0.248531	0.0315591	0.0633731	0.0514485	0.164216	0.0935802	0.200905	0.330263	0.248856	0.0516586	0.2329
AlphScore	0.152766	0.281643	NA	0.182428	0.371029	0.260167	0.256631	NA	NA	0.118445	0.133133	0.276964	0.236092	NA	0.272275	0.208381	0.115143	0.205531	0.0535991	0.0356687	0.0120086	0.202003	0.226763	NA	NA	0.120728	0.00958041	0.101744	0.0735308	0.0822316	0.0734768	0.0164828	0.0835442	0.0847988	0.0633968	0.331403	0.0519352	0.054089	NA	0.0233447	0.0511976	0.0234723	0.0846686	0.0689001	0.15198	NA	0.137689	0.089367	0.281695
MutFormer_score	0.151639	0.139142	0.0662229	0.362347	0.400869	0.268387	0.327775	0.0293887	NA	0.142214	0.106939	0.342065	0.181833	0.0991766	0.261666	0.155135	0.149898	0.362782	0.0375768	0.0404124	0.010898	0.243038	0.276842	0.141922	NA	0.0944172	0.0106058	0.0632063	0.0729108	0.0634838	0.0630275	0.0149187	0.255621	0.0381947	0.0317976	0.353686	0.0539385	0.0132561	0.216471	0.013681	0.0738079	0.0584751	0.183943	0.0627352	0.231794	0.0925347	0.373378	0.0869709	0.364777
M_CAP_score	0.147482	0.300703	0.107562	0.300437	0.297085	0.179863	0.259723	0.045823	NA	0.163648	0.126846	0.171753	0.126734	0.136849	0.178475	0.388147	0.150999	0.29991	0.0123831	0.0530439	0.0304109	0.232329	0.206779	0.141576	NA	0.0596426	0.0123162	0.0265472	0.165432	0.0649125	0.015931	0.0185843	0.285523	0.0817489	0.0842963	0.323774	0.0710914	0.12414	0.177179	0.0138208	0.0385919	0.0477499	0.134222	0.0490099	0.0984793	0.117363	0.445331	0.0404171	0.134529
Polyphen2_HVAR_score	0.137818	0.18769	0.0817835	0.134966	0.359863	0.205058	0.0390952	0.0600425	NA	0.0907253	0.155264	0.270488	0.275825	0.143579	0.268359	0.256679	0.128927	0.160057	NA	0.0445178	0.00588984	0.272655	0.234582	0.361252	NA	0.0666639	0.00772536	0.0941852	0.0612139	0.0765134	0.0509769	0.0137718	0.112638	0.105068	0.0205794	0.242315	0.0420514	0.110407	0.241906	0.00995257	0.0798292	0.0228107	0.141174	0.0827106	0.187334	0.153617	0.160734	0.0685253	0.375099
gpnmsa_score	0.126866	0.132619	0.124093	0.0920432	0.302749	0.232465	0.290664	0.0977717	NA	0.100997	0.34352	0.156187	0.200907	0.0722187	0.287239	0.144455	0.0283549	0.0504171	0.081721	0.0579455	0.0204383	0.164099	0.184475	0.330323	NA	0.0193313	0.0366622	0.0428182	0.186246	0.0765012	0.0478655	0.0185141	0.084077	0.121818	0.0279104	0.184676	0.0371457	0.0215321	0.120882	0.0369307	0.0248955	0.0360531	0.165094	0.0768024	0.134648	0.0509846	0.282025	0.0732695	0.243274
Polyphen2_HDIV_score	0.123319	0.130931	0.0563855	0.108361	0.337253	0.212283	0.0248407	0.0488812	NA	0.0725482	0.139088	0.217168	0.247533	0.124604	0.279179	0.210944	0.127801	0.166929	NA	0.0324642	0.00377939	0.24683	0.208591	0.337527	NA	0.0378919	0.0197016	0.0987119	0.0429436	0.0556786	0.0455831	0.0109433	0.0838541	0.0894897	0.0572116	0.204363	0.0270249	0.059452	0.240421	0.0157245	0.0745887	0.0225183	0.100078	0.0676479	0.162967	0.0850582	0.073917	0.0723818	0.374811
fathmm_XF_coding_score	0.111487	0.0713975	0.0776506	0.138021	0.090477	0.147643	0.370634	0.0596734	NA	0.0737365	0.0941311	NA	NA	0.052864	0.29191	0.0303852	0.0269592	0.0690359	0.230547	0.0140699	0.0189272	0.0839579	0.0839195	0.391372	NA	0.0831725	0.0336588	0.0967457	0.141421	0.0494272	0.0361066	0.0111533	0.0383674	0.0673456	0.0479177	0.191904	0.205533	0.137859	0.229811	0.062448	NA	0.0207585	0.0989238	NA	0.109556	0.133461	0.0160688	0.0489835	0.204572
SIFT_score	0.110737	0.0655853	0.0506351	0.0566515	0.290489	0.16917	0.183446	0.0478436	NA	0.0624291	NA	NA	0.156139	0.114712	0.181341	0.140837	0.120471	0.176922	NA	0.0339778	0.00695224	0.234964	0.188988	2.81118e-05	NA	0.122728	0.010069	0.0917617	0.0700974	0.141012	0.0275023	0.0144887	0.0944333	0.0938855	0.0526306	0.236279	0.0284341	0.0596597	0.226302	0.0147311	0.0638657	0.0401283	0.0771324	0.0400308	0.154265	NA	NA	0.0749825	0.324097
PrimateAI_score	0.107465	0.0939358	0.0575445	0.434682	0.107897	0.134751	0.502002	0.080535	NA	0.031654	0.101223	0.16388	0.0867322	0.110279	0.38704	0.311696	0.038159	0.0503789	0.017434	0.0186753	0.0262088	0.166222	0.166081	NA	NA	0.0295444	0.00998906	0.148185	0.0810272	0.109283	0.0373435	0.0255257	0.0328827	0.0795914	0.0216557	0.136283	0.0574587	0.0364849	0.104932	0.0129644	0.0198555	0.023186	0.154642	0.0604068	0.0683808	0.100464	0.172415	0.054621	0.156185
LIST_S2_score	0.0987335	0.104969	NA	0.160423	0.120976	0.0972591	0.563459	NA	NA	0.0261076	0.0689375	0.177551	0.109873	NA	NA	NA	NA	NA	NA	0.0293855	NA	NA	0.0908115	0.185448	NA	NA	0.0186409	0.10639	NA	0.0426894	NA	0.0147731	0.0387402	0.0862338	0.0638906	0.173353	0.019133	0.0534461	NA	0.0291225	0.0277855	0.026734	NA	0.0806903	0.0394403	0.122162	0.045918	0.0744201	0.274873
[truncated: 10 more columns]

## Sheet: Supplementary Table 8
#Supplementary Table 8. DD and NDD datasets.
DD dataset								NDD dataset
chr	pos	ref	alt	gene	phenotype	source		chr	pos	ref	alt	gene	phenotype	source
12	6596097	G	A	CHD4	DD	https://doi.org/10.1038/nature21062		1	1804574	G	T	GNB1	NDD	https://doi.org/10.1016/j.cell.2019.12.036;https://doi.org/10.1093/nar/gkw865
X	124063195	G	A	STAG2	DD	https://doi.org/10.1038/nature21062		1	1806503	A	G	GNB1	NDD	https://doi.org/10.1016/j.cell.2019.12.036;https://doi.org/10.1093/nar/gkw865
12	6588383	C	T	CHD4	DD	https://doi.org/10.1038/nature21062		1	2025049	T	A	GABRD	NDD	https://doi.org/10.1093/nar/gkw865
X	53615786	A	C	HUWE1	DD	https://doi.org/10.1038/nature21062		1	2303313	G	A	SKI	NDD	https://doi.org/10.1093/nar/gkw865
6	43007265	G	A	PPP2R5D	DD	https://doi.org/10.1038/nature21062		1	3831104	C	T	CEP104	NDD	https://doi.org/10.1016/j.cell.2019.12.036;https://doi.org/10.1093/nar/gkw865
6	43007275	C	G	PPP2R5D	DD	https://doi.org/10.1038/nature21062		1	6129057	C	T	CHD5	NDD	https://doi.org/10.1093/nar/gkw865
9	2060868	G	A	SMARCA2	DD	https://doi.org/10.1038/nature21062		1	6131658	G	A	CHD5	NDD	https://doi.org/10.1093/nar/gkw865
9	2181575	G	A	SMARCA2	DD	https://doi.org/10.1038/nature21062		1	6131746	C	T	CHD5	NDD	https://doi.org/10.1093/nar/gkw865
7	98948327	C	T	TRRAP	DD	https://doi.org/10.1038/nature21062		1	6135361	C	G	CHD5	NDD	https://doi.org/10.1016/j.cell.2019.12.036;https://doi.org/10.1093/nar/gkw865
9	2060867	C	T	SMARCA2	DD	https://doi.org/10.1038/nature21062		1	6154788	G	A	CHD5	NDD	https://doi.org/10.1016/j.cell.2019.12.036;https://doi.org/10.1093/nar/gkw865
9	2123728	A	G	SMARCA2	DD	https://doi.org/10.1038/nature21062		1	7249591	G	A	CAMTA1	NDD	https://doi.org/10.1016/j.cell.2019.12.036;https://doi.org/10.1093/nar/gkw865
9	2058457	G	A	SMARCA2	DD	https://doi.org/10.1038/nature21062		1	7737315	C	T	CAMTA1	NDD	https://doi.org/10.1016/j.cell.2019.12.036;https://doi.org/10.1093/nar/gkw865
7	39999474	T	G	CDK13	DD	https://doi.org/10.1038/nature21062		1	8358763	C	T	RERE	NDD	https://doi.org/10.1093/nar/gkw865
6	79015086	T	C	PHIP	DD	https://doi.org/10.1038/nature21062		1	8359867	C	T	RERE	NDD	https://doi.org/10.1016/j.cell.2019.12.036;https://doi.org/10.1093/nar/gkw865
6	79042975	A	T	PHIP	DD	https://doi.org/10.1038/nature21062		1	8359966	C	T	RERE	NDD	https://doi.org/10.1016/j.cell.2019.12.036;https://doi.org/10.1093/nar/gkw865
5	140114797	A	T	PURA	DD	https://doi.org/10.1038/nature21062		1	8362792	C	T	RERE	NDD	https://doi.org/10.1093/nar/gkw865
7	98971824	C	G	TRRAP	DD	https://doi.org/10.1038/nature21062		1	11124528	T	C	MTOR	NDD	https://doi.org/10.1093/nar/gkw865
7	98930124	A	G	TRRAP	DD	https://doi.org/10.1038/nature21062		1	11130747	C	T	MTOR	NDD	https://doi.org/10.1016/j.cell.2019.12.036;https://doi.org/10.1093/nar/gkw865
7	98953320	T	A	TRRAP	DD	https://doi.org/10.1038/nature21062		1	11144735	C	T	MTOR	NDD	https://doi.org/10.1093/nar/gkw865
7	98953322	G	T	TRRAP	DD	https://doi.org/10.1038/nature21062		1	11157246	C	T	MTOR	NDD	https://doi.org/10.1016/j.cell.2019.12.036;https://doi.org/10.1093/nar/gkw865
7	98994677	C	G	TRRAP	DD	https://doi.org/10.1038/nature21062		1	11228819	C	T	MTOR	NDD	https://doi.org/10.1093/nar/gkw865
7	98930150	G	A	TRRAP	DD	https://doi.org/10.1038/nature21062		1	11827142	T	C	CLCN6	NDD	https://doi.org/10.1016/j.cell.2019.12.036;https://doi.org/10.1093/nar/gkw865
3	177033065	T	C	TBL1XR1	DD	https://doi.org/10.1038/nature21062		1	11836061	C	T	CLCN6	NDD	https://doi.org/10.1093/nar/gkw865
17	7897141	A	G	CHD3	DD	https://doi.org/10.1038/nature21062		1	11840162	G	A	CLCN6	NDD	https://doi.org/10.1016/j.cell.2019.12.036;https://doi.org/10.1093/nar/gkw865
3	177038112	C	A	TBL1XR1	DD	https://doi.org/10.1038/nature21062		1	15876258	G	A	SPEN	NDD	https://doi.org/10.1016/j.cell.2019.12.036;https://doi.org/10.1093/nar/gkw865
6	7571480	T	C	DSP	DD	https://doi.org/10.1038/nature21062		1	15909425	A	C	SPEN	NDD	https://doi.org/10.1093/nar/gkw865
7	44242328	C	T	CAMK2B	DD	https://doi.org/10.1038/nature21062		1	15930825	C	T	SPEN	NDD	https://doi.org/10.1093/nar/gkw865
9	127666206	G	A	STXBP1	DD	https://doi.org/10.1038/nature21062		1	15932269	G	A	SPEN	NDD_control	https://doi.org/10.1093/nar/gkw865
2	165389444	G	A	SCN2A	DD	https://doi.org/10.1038/nature21062		1	15934516	C	T	SPEN	NDD	https://doi.org/10.1093/nar/gkw865
10	248370	G	A	ZMYND11	DD	https://doi.org/10.1038/nature21062		1	15935216	C	G	SPEN	NDD	https://doi.org/10.1093/nar/gkw865
20	492282	T	C	CSNK2A1	DD	https://doi.org/10.1038/nature21062		1	15935472	A	G	SPEN	NDD	https://doi.org/10.1093/nar/gkw865
20	487466	G	A	CSNK2A1	DD	https://doi.org/10.1038/nature21062		1	18879330	G	A	ALDH4A1	NDD	https://doi.org/10.1093/nar/gkw865
20	492303	C	T	CSNK2A1	DD	https://doi.org/10.1038/nature21062		1	18883383	T	C	ALDH4A1	NDD	https://doi.org/10.1093/nar/gkw865
20	499909	C	T	CSNK2A1	DD	https://doi.org/10.1038/nature21062		1	19219358	G	A	EMC1	NDD	https://doi.org/10.1093/nar/gkw865
20	492286	A	T	CSNK2A1	DD	https://doi.org/10.1038/nature21062		1	19220795	G	A	EMC1	NDD	https://doi.org/10.1093/nar/gkw865
20	492353	T	C	CSNK2A1	DD	https://doi.org/10.1038/nature21062		1	21564103	G	A	ALPL	NDD	https://doi.org/10.1093/nar/gkw865
10	75029865	G	A	KAT6B	DD	https://doi.org/10.1038/nature21062		1	21573719	A	G	ALPL	NDD	https://doi.org/10.1016/j.cell.2019.12.036;https://doi.org/10.1093/nar/gkw865
10	75029839	G	C	KAT6B	DD	https://doi.org/10.1038/nature21062		1	22078486	C	T	CDC42	NDD	https://doi.org/10.1093/nar/gkw865
X	71130099	T	A	MED12	DD	https://doi.org/10.1038/nature21062		1	22078546	A	G	CDC42	NDD	https://doi.org/10.1093/nar/gkw865
22	30949809	G	A	MORC2	DD	https://doi.org/10.1038/nature21062		1	22086456	A	G	CDC42	NDD	https://doi.org/10.1093/nar/gkw865
22	30946373	G	A	MORC2	DD	https://doi.org/10.1038/nature21062		1	23077232	A	G	KDM1A	NDD	https://doi.org/10.1016/j.cell.2019.12.036;https://doi.org/10.1093/nar/gkw865
22	30934912	G	A	MORC2	DD	https://doi.org/10.1038/nature21062		1	23825381	A	G	HMGCL	NDD	https://doi.org/10.1093/nar/gkw865
22	30937931	T	C	MORC2	DD	https://doi.org/10.1038/nature21062		1	26438217	G	A	DHDDS	NDD	https://doi.org/10.1093/nar/gkw865
22	30958684	C	T	MORC2	DD	https://doi.org/10.1038/nature21062		1	26457880	G	A	DHDDS	NDD	https://doi.org/10.1016/j.cell.2019.12.036;https://doi.org/10.1093/nar/gkw865
22	30928135	G	A	MORC2	DD	https://doi.org/10.1038/nature21062		1	26731263	C	A	ARID1A	NDD	https://doi.org/10.1093/nar/gkw865
1	244055165	G	A	ZBTB18	DD	https://doi.org/10.1038/nature21062		1	26767951	C	A	ARID1A	NDD	https://doi.org/10.1016/j.cell.2019.12.036;https://doi.org/10.1093/nar/gkw865
1	35893808	A	T	AGO1	DD	https://doi.org/10.1038/nature21062		1	26767959	G	A	ARID1A	NDD	https://doi.org/10.1016/j.cell.2019.12.036;https://doi.org/10.1093/nar/gkw865
20	63439679	G	C	KCNQ2	DD	https://doi.org/10.1038/nature21062		1	26774399	T	C	ARID1A	NDD	https://doi.org/10.1093/nar/gkw865
20	63438651	G	A	KCNQ2	DD	https://doi.org/10.1038/nature21062		1	26779932	G	C	ARID1A	NDD	https://doi.org/10.1093/nar/gkw865
20	63438644	G	A	KCNQ2	DD	https://doi.org/10.1038/nature21062		1	26779995	A	G	ARID1A	NDD	https://doi.org/10.1093/nar/gkw865
20	63442429	C	T	KCNQ2	DD	https://doi.org/10.1038/nature21062		1	27333995	G	A	TMEM222	NDD	https://doi.org/10.1093/nar/gkw865
20	63439684	C	T	KCNQ2	DD	https://doi.org/10.1038/nature21062		1	27550932	C	T	AHDC1	NDD	https://doi.org/10.1093/nar/gkw865
5	75426432	G	A	COL4A3BP	DD	https://doi.org/10.1038/nature21062		1	30964881	G	A	PUM1	NDD	https://doi.org/10.1093/nar/gkw865
1	26767951	C	A	ARID1A	DD	https://doi.org/10.1038/nature21062		1	30995205	C	T	PUM1	NDD	https://doi.org/10.1093/nar/gkw865
18	51078306	A	G	SMAD4	DD	https://doi.org/10.1038/nature21062		1	35561044	C	T	NCDN	NDD	https://doi.org/10.1093/nar/gkw865
3	11018610	C	T	SLC6A1	DD	https://doi.org/10.1038/nature21062		1	35565458	G	A	NCDN	NDD	https://doi.org/10.1016/j.cell.2019.12.036;https://doi.org/10.1093/nar/gkw865
2	199328880	C	T	SATB2	DD	https://doi.org/10.1038/nature21062		1	35893730	T	C	AGO1	NDD	https://doi.org/10.1016/j.cell.2019.12.036;https://doi.org/10.1093/nar/gkw865
2	199308957	C	T	SATB2	DD	https://doi.org/10.1038/nature21062		1	35893808	A	T	AGO1	NDD	https://doi.org/10.1016/j.cell.2019.12.036;https://doi.org/10.1093/nar/gkw865
2	199328888	C	T	SATB2	DD	https://doi.org/10.1038/nature21062		1	35902329	G	C	AGO1	NDD	https://doi.org/10.1016/j.cell.2019.12.036;https://doi.org/10.1093/nar/gkw865
2	199348708	C	A	SATB2	DD	https://doi.org/10.1038/nature21062		1	35919519	C	T	AGO1	NDD	https://doi.org/10.1093/nar/gkw865
19	46921373	T	G	ARHGAP35	DD	https://doi.org/10.1038/nature21062		1	36092438	C	T	ADPRHL2	NDD	https://doi.org/10.1093/nar/gkw865
11	66211206	C	T	PACS1	DD	https://doi.org/10.1038/nature21062		1	39432610	C	T	MACF1	NDD	https://doi.org/10.1016/j.cell.2019.12.036;https://doi.org/10.1093/nar/gkw865
12	112450364	T	G	PTPN11	DD	https://doi.org/10.1038/nature21062		1	39968359	G	A	MFSD2A	NDD	https://doi.org/10.1093/nar/gkw865
2	25247713	C	T	DNMT3A	DD	https://doi.org/10.1038/nature21062		1	40078650	A	C	PPT1	NDD	https://doi.org/10.1016/j.cell.2019.12.036;https://doi.org/10.1093/nar/gkw865
9	128220201	C	T	DNM1	DD	https://doi.org/10.1038/nature21062		1	42930685	G	A	SLC2A1	NDD	https://doi.org/10.1016/j.cell.2019.12.036;https://doi.org/10.1093/nar/gkw865
9	128222212	A	T	DNM1	DD	https://doi.org/10.1038/nature21062		1	43404390	C	T	SZT2	NDD	https://doi.org/10.1016/j.cell.2019.12.036;https://doi.org/10.1093/nar/gkw865
9	128220057	T	C	DNM1	DD	https://doi.org/10.1038/nature21062		1	43426064	G	A	SZT2	NDD	https://doi.org/10.1016/j.cell.2019.12.036;https://doi.org/10.1093/nar/gkw865
9	128222850	C	G	DNM1	DD	https://doi.org/10.1038/nature21062		1	43447135	G	A	SZT2	NDD	https://doi.org/10.1093/nar/gkw865
2	165354204	T	C	SCN2A	DD	https://doi.org/10.1038/nature21062		1	45327881	G	A	HPDL	NDD	https://doi.org/10.1093/nar/gkw865
2	165386974	T	A	SCN2A	DD	https://doi.org/10.1038/nature21062		1	47280440	C	A	STIL	NDD	https://doi.org/10.1016/j.cell.2019.12.036;https://doi.org/10.1093/nar/gkw865
2	165331495	A	G	SCN2A	DD	https://doi.org/10.1038/nature21062		1	54854090	C	T	DHCR24	NDD_control	https://doi.org/10.1093/nar/gkw865
19	13317229	G	A	CACNA1A	DD	https://doi.org/10.1038/nature21062		1	61088345	T	C	NFIA	NDD	https://doi.org/10.1016/j.cell.2019.12.036;https://doi.org/10.1093/nar/gkw865
19	54143151	G	C	CNOT3	DD	https://doi.org/10.1038/nature21062		1	62631315	T	C	DOCK7	NDD	https://doi.org/10.1016/j.cell.2019.12.036;https://doi.org/10.1093/nar/gkw865
19	54143490	C	G	CNOT3	DD	https://doi.org/10.1038/nature21062		1	65392671	C	T	DNAJC6	NDD	https://doi.org/10.1093/nar/gkw865
19	54145676	C	T	CNOT3	DD	https://doi.org/10.1038/nature21062		1	69760250	T	C	LRRC7	NDD	https://doi.org/10.1093/nar/gkw865
19	54145677	G	A	CNOT3	DD	https://doi.org/10.1038/nature21062		1	70018788	A	G	LRRC7	NDD	https://doi.org/10.1093/nar/gkw865
12	6593191	G	T	CHD4	DD	https://doi.org/10.1038/nature21062		1	94983192	C	G	ALG14	NDD	https://doi.org/10.1016/j.cell.2019.12.036;https://doi.org/10.1093/nar/gkw865
2	28793869	G	A	PPP1CB	DD	https://doi.org/10.1038/nature21062		1	97373629	C	A	DPYD	NDD	https://doi.org/10.1016/j.cell.2019.12.036;https://doi.org/10.1093/nar/gkw865
2	28793893	A	G	PPP1CB	DD	https://doi.org/10.1038/nature21062		1	97450205	A	G	DPYD	NDD	https://doi.org/10.1093/nar/gkw865
2	28776944	C	G	PPP1CB	DD	https://doi.org/10.1038/nature21062		1	109626897	A	G	AMPD2	NDD	https://doi.org/10.1093/nar/gkw865
2	28778821	G	A	PPP1CB	DD	https://doi.org/10.1038/nature21062		1	109628224	A	C	AMPD2	NDD	https://doi.org/10.1016/j.cell.2019.12.036;https://doi.org/10.1093/nar/gkw865
X	41346608	G	A	DDX3X	DD	https://doi.org/10.1038/nature21062		1	110172198	T	C	SLC6A17	NDD	https://doi.org/10.1093/nar/gkw865
X	41344395	T	C	DDX3X	DD	https://doi.org/10.1038/nature21062		1	110176704	G	A	SLC6A17	NDD	https://doi.org/10.1093/nar/gkw865
X	41345280	C	T	DDX3X	DD	https://doi.org/10.1038/nature21062		1	110603638	G	A	KCNA2	NDD	https://doi.org/10.1093/nar/gkw865
X	41343313	T	C	DDX3X	DD	https://doi.org/10.1038/nature21062		1	114713914	G	C	NRAS	NDD	https://doi.org/10.1016/j.cell.2019.12.036;https://doi.org/10.1093/nar/gkw865
X	41346316	G	A	DDX3X	DD	https://doi.org/10.1038/nature21062		1	114718698	T	C	CSDE1	NDD	https://doi.org/10.1016/j.cell.2019.12.036;https://doi.org/10.1093/nar/gkw865
1	164807618	T	C	PBX1	DD	https://doi.org/10.1038/nature21062		1	116389591	G	C	ATP1A1	NDD	https://doi.org/10.1016/j.cell.2019.12.036;https://doi.org/10.1093/nar/gkw865
1	164807544	G	A	PBX1	DD	https://doi.org/10.1038/nature21062		1	116390355	C	G	ATP1A1	NDD	https://doi.org/10.1093/nar/gkw865
8	41932648	G	A	KAT6A	DD	https://doi.org/10.1038/nature21062		1	116392888	T	C	ATP1A1	NDD	https://doi.org/10.1093/nar/gkw865
3	136151932	T	C	MSL2	DD	https://doi.org/10.1038/nature21062		1	116400995	G	A	ATP1A1	NDD	https://doi.org/10.1093/nar/gkw865
5	14397112	C	A	TRIO	DD	https://doi.org/10.1038/nature21062		1	119042340	T	C	WARS2	NDD	https://doi.org/10.1093/nar/gkw865
5	14397113	C	T	TRIO	DD	https://doi.org/10.1038/nature21062		1	119737129	C	T	PHGDH	NDD	https://doi.org/10.1093/nar/gkw865
17	7902970	C	T	CHD3	DD	https://doi.org/10.1038/nature21062		1	151405407	T	C	POGZ	NDD	https://doi.org/10.1093/nar/gkw865
12	51806359	G	A	SCN8A	DD	https://doi.org/10.1038/nature21062		1	151405407	T	G	POGZ	NDD	https://doi.org/10.1016/j.cell.2019.12.036;https://doi.org/10.1093/nar/gkw865
12	51688786	A	G	SCN8A	DD	https://doi.org/10.1038/nature21062		1	151405910	T	C	POGZ	NDD	https://doi.org/10.1093/nar/gkw865
10	113143974	C	T	TCF7L2	DD	https://doi.org/10.1038/nature21062		1	151411628	G	C	POGZ	NDD	https://doi.org/10.1093/nar/gkw865
15	66485026	T	G	MAP2K1	DD	https://doi.org/10.1038/nature21062		1	151411713	T	C	POGZ	NDD	https://doi.org/10.1093/nar/gkw865
10	252459	C	T	ZMYND11	DD	https://doi.org/10.1038/nature21062		1	151658283	C	T	SNX27	NDD	https://doi.org/10.1016/j.cell.2019.12.036;https://doi.org/10.1093/nar/gkw865
10	248585	G	A	ZMYND11	DD	https://doi.org/10.1038/nature21062		1	154227321	G	T	UBAP2L	NDD	https://doi.org/10.1016/j.cell.2019.12.036;https://doi.org/10.1093/nar/gkw865
10	252381	T	C	ZMYND11	DD	https://doi.org/10.1038/nature21062		1	154257424	A	C	UBAP2L	NDD	https://doi.org/10.1016/j.cell.2019.12.036;https://doi.org/10.1093/nar/gkw865
2	26727769	G	A	KCNK3	DD	https://doi.org/10.1038/nature21062		1	154585275	A	C	ADAR	NDD	https://doi.org/10.1016/j.cell.2019.12.036;https://doi.org/10.1093/nar/gkw865
16	67620743	C	T	CTCF	DD	https://doi.org/10.1038/nature21062		1	154869442	T	C	KCNN3	NDD	https://doi.org/10.1016/j.cell.2019.12.036;https://doi.org/10.1093/nar/gkw865
16	67620712	C	T	CTCF	DD	https://doi.org/10.1038/nature21062		1	155238620	A	G	GBA	NDD	https://doi.org/10.1093/nar/gkw865
17	59681719	T	C	CLTC	DD	https://doi.org/10.1038/nature21062		1	155480700	C	A	ASH1L	NDD	https://doi.org/10.1016/j.cell.2019.12.036;https://doi.org/10.1093/nar/gkw865
10	129877825	C	A	EBF3	DD	https://doi.org/10.1038/nature21062		1	155482379	C	T	ASH1L	NDD	https://doi.org/10.1093/nar/gkw865
8	143818255	C	T	PUF60	DD	https://doi.org/10.1038/nature21062		1	156868180	G	A	NTRK1	NDD	https://doi.org/10.1093/nar/gkw865
8	143818408	C	T	PUF60	DD	https://doi.org/10.1038/nature21062		1	160031371	C	G	PIGM	NDD	https://doi.org/10.1093/nar/gkw865
8	143816728	C	T	PUF60	DD	https://doi.org/10.1038/nature21062		1	160128730	G	T	ATP1A2	NDD	https://doi.org/10.1016/j.cell.2019.12.036;https://doi.org/10.1093/nar/gkw865
1	181577831	G	A	CACNA1E	DD	https://doi.org/10.1038/nature21062		1	160128731	G	C	ATP1A2	NDD	https://doi.org/10.1016/j.cell.2019.12.036;https://doi.org/10.1093/nar/gkw865
1	181580673	T	A	CACNA1E	DD	https://doi.org/10.1038/nature21062		1	160279604	G	A	PEX19	NDD	https://doi.org/10.1016/j.cell.2019.12.036;https://doi.org/10.1093/nar/gkw865
1	181757061	A	T	CACNA1E	DD	https://doi.org/10.1038/nature21062		1	160282497	C	T	PEX19	NDD	https://doi.org/10.1016/j.cell.2019.12.036;https://doi.org/10.1093/nar/gkw865
9	128626542	C	G	SPTAN1	DD	https://doi.org/10.1038/nature21062		1	164563309	C	T	PBX1	NDD	https://doi.org/10.1093/nar/gkw865
X	41210571	T	G	USP9X	DD	https://doi.org/10.1038/nature21062		1	164799805	G	C	PBX1	NDD	https://doi.org/10.1093/nar/gkw865
2	15945850	G	A	MYCN	DD	https://doi.org/10.1038/nature21062		1	164807544	G	A	PBX1	NDD	https://doi.org/10.1016/j.cell.2019.12.036;https://doi.org/10.1093/nar/gkw865
2	229768642	G	C	TRIP12	DD	https://doi.org/10.1038/nature21062		1	164807618	T	C	PBX1	NDD	https://doi.org/10.1016/j.cell.2019.12.036;https://doi.org/10.1093/nar/gkw865
7	70785446	C	T	AUTS2	DD	https://doi.org/10.1038/nature21062		1	164812096	A	G	PBX1	NDD_control	https://doi.org/10.1093/nar/gkw865
19	55661148	C	T	U2AF2	DD	https://doi.org/10.1038/nature21062		1	164821568	C	T	PBX1	NDD	https://doi.org/10.1093/nar/gkw865
2	47820412	T	C	FBXO11	DD	https://doi.org/10.1038/nature21062		1	173751842	C	T	KLHL20	NDD	https://doi.org/10.1093/nar/gkw865
X	154031431	G	A	MECP2	DD	https://doi.org/10.1038/nature21062		1	173775691	G	A	KLHL20	NDD_control	https://doi.org/10.1093/nar/gkw865
X	154031355	G	A	MECP2	DD	https://doi.org/10.1038/nature21062		1	181511467	C	T	CACNA1E	NDD	https://doi.org/10.1016/j.cell.2019.12.036;https://doi.org/10.1093/nar/gkw865
3	70977674	G	A	FOXP1	DD	https://doi.org/10.1038/nature21062		1	181577831	G	A	CACNA1E	NDD	https://doi.org/10.1016/j.cell.2019.12.036;https://doi.org/10.1093/nar/gkw865
3	70977665	G	A	FOXP1	DD	https://doi.org/10.1038/nature21062		1	181580673	T	A	CACNA1E	NDD	https://doi.org/10.1016/j.cell.2019.12.036;https://doi.org/10.1093/nar/gkw865
8	132180246	G	A	KCNQ3	DD	https://doi.org/10.1038/nature21062		1	181757061	A	T	CACNA1E	NDD	https://doi.org/10.1016/j.cell.2019.12.036;https://doi.org/10.1093/nar/gkw865
12	6599855	C	T	CHD4	DD	https://doi.org/10.1038/nature21062		1	181763524	C	T	CACNA1E	NDD	https://doi.org/10.1016/j.cell.2019.12.036;https://doi.org/10.1093/nar/gkw865
10	121500843	G	A	FGFR2	DD	https://doi.org/10.1038/nature21062		1	181776219	G	A	CACNA1E	NDD	https://doi.org/10.1093/nar/gkw865
16	3778172	T	C	CREBBP	DD	https://doi.org/10.1038/nature21062		1	182384458	G	A	GLUL	NDD	https://doi.org/10.1093/nar/gkw865
2	99752289	G	A	AFF3	DD	https://doi.org/10.1038/nature21062		1	182860084	G	A	DHX9	NDD	https://doi.org/10.1016/j.cell.2019.12.036;https://doi.org/10.1093/nar/gkw865
9	95479100	A	C	PTCH1	DD	https://doi.org/10.1038/nature21062		1	184706781	G	A	EDEM3	NDD	https://doi.org/10.1093/nar/gkw865
16	30707326	C	G	SRCAP	DD	https://doi.org/10.1038/nature21062		1	196425889	C	G	KCNT2	NDD	https://doi.org/10.1093/nar/gkw865
17	62565059	G	A	TLK2	DD	https://doi.org/10.1038/nature21062		1	196465362	C	G	KCNT2	NDD	https://doi.org/10.1016/j.cell.2019.12.036;https://doi.org/10.1093/nar/gkw865
4	1213028	G	A	CTBP1	DD	https://doi.org/10.1038/nature21062		1	197102279	T	G	ASPM	NDD_control	https://doi.org/10.1093/nar/gkw865
2	47839447	T	A	FBXO11	DD	https://doi.org/10.1038/nature21062		1	197103018	C	T	ASPM	NDD	https://doi.org/10.1016/j.cell.2019.12.036;https://doi.org/10.1093/nar/gkw865
2	47808173	T	C	FBXO11	DD	https://doi.org/10.1038/nature21062		1	197142685	T	G	ASPM	NDD	https://doi.org/10.1093/nar/gkw865
7	40046007	A	G	CDK13	DD	https://doi.org/10.1038/nature21062		1	200560831	G	T	KIF14	NDD	https://doi.org/10.1093/nar/gkw865
6	90553565	C	G	MAP3K7	DD	https://doi.org/10.1038/nature21062		1	200617990	T	C	KIF14	NDD	https://doi.org/10.1093/nar/gkw865
11	686871	T	C	DEAF1	DD	https://doi.org/10.1038/nature21062		1	200618542	C	G	KIF14	NDD	https://doi.org/10.1093/nar/gkw865
17	62602140	G	A	TLK2	DD	https://doi.org/10.1038/nature21062		1	200663972	C	T	DDX59	NDD	https://doi.org/10.1093/nar/gkw865
17	62596611	A	G	TLK2	DD	https://doi.org/10.1038/nature21062		1	202749126	C	T	KDM5B	NDD	https://doi.org/10.1093/nar/gkw865
17	62586178	A	G	TLK2	DD	https://doi.org/10.1038/nature21062		1	202773179	C	G	KDM5B	NDD	https://doi.org/10.1093/nar/gkw865
19	35729168	C	T	KMT2B	DD	https://doi.org/10.1038/nature21062		1	204973362	T	C	NFASC	NDD	https://doi.org/10.1093/nar/gkw865
19	35730772	T	C	KMT2B	DD	https://doi.org/10.1038/nature21062		1	204973407	G	A	NFASC	NDD	https://doi.org/10.1093/nar/gkw865
12	115975207	C	T	MED13L	DD	https://doi.org/10.1038/nature21062		1	205059096	G	A	CNTN2	NDD	https://doi.org/10.1093/nar/gkw865
12	115970656	G	A	MED13L	DD	https://doi.org/10.1038/nature21062		1	205099809	G	A	RBBP5	NDD	https://doi.org/10.1093/nar/gkw865
2	196220112	T	G	HECW2	DD	https://doi.org/10.1038/nature21062		1	205103861	C	T	RBBP5	NDD	https://doi.org/10.1093/nar/gkw865
12	23536655	C	G	SOX5	DD	https://doi.org/10.1038/nature21062		1	210804142	C	T	KCNH1	NDD	https://doi.org/10.1016/j.cell.2019.12.036;https://doi.org/10.1093/nar/gkw865
19	55668519	C	T	U2AF2	DD	https://doi.org/10.1038/nature21062		1	210804149	T	C	KCNH1	NDD	https://doi.org/10.1016/j.cell.2019.12.036;https://doi.org/10.1093/nar/gkw865
7	80212804	A	G	GNAI1	DD	https://doi.org/10.1038/nature21062		1	210919967	G	C	KCNH1	NDD	https://doi.org/10.1016/j.cell.2019.12.036;https://doi.org/10.1093/nar/gkw865
7	80188987	A	C	GNAI1	DD	https://doi.org/10.1038/nature21062		1	210920032	C	T	KCNH1	NDD	https://doi.org/10.1016/j.cell.2019.12.036;https://doi.org/10.1093/nar/gkw865
7	80217423	T	A	GNAI1	DD	https://doi.org/10.1038/nature21062		1	214642482	G	A	CENPF	NDD	https://doi.org/10.1093/nar/gkw865
6	149378262	A	G	TAB2	DD	https://doi.org/10.1038/nature21062		1	214647122	G	C	CENPF	NDD	https://doi.org/10.1016/j.cell.2019.12.036;https://doi.org/10.1093/nar/gkw865
13	110177850	C	T	COL4A1	DD	https://doi.org/10.1038/nature21062		1	214648775	A	G	CENPF	NDD	https://doi.org/10.1093/nar/gkw865
15	92956591	C	T	CHD2	DD	https://doi.org/10.1038/nature21062		1	220191218	T	C	RAB3GAP2	NDD	https://doi.org/10.1016/j.cell.2019.12.036;https://doi.org/10.1093/nar/gkw865
14	102002950	G	A	DYNC1H1	DD	https://doi.org/10.1038/nature21062		1	224424520	A	C	WDR26	NDD	https://doi.org/10.1016/j.cell.2019.12.036;https://doi.org/10.1093/nar/gkw865
14	102000319	G	A	DYNC1H1	DD	https://doi.org/10.1038/nature21062		1	225922248	C	T	PYCR2	NDD	https://doi.org/10.1016/j.cell.2019.12.036;https://doi.org/10.1093/nar/gkw865
14	101995022	C	T	DYNC1H1	DD	https://doi.org/10.1038/nature21062		1	226065771	G	C	H3F3A	NDD	https://doi.org/10.1016/j.cell.2019.12.036;https://doi.org/10.1093/nar/gkw865
18	44951901	C	G	SETBP1	DD	https://doi.org/10.1038/nature21062		1	228158951	C	T	GJC2	NDD	https://doi.org/10.1093/nar/gkw865
2	25239211	T	C	DNMT3A	DD	https://doi.org/10.1038/nature21062		1	230274458	C	T	GALNT2	NDD	https://doi.org/10.1016/j.cell.2019.12.036;https://doi.org/10.1093/nar/gkw865
2	26727781	A	G	KCNK3	DD	https://doi.org/10.1038/nature21062		1	231266026	T	C	GNPAT	NDD	https://doi.org/10.1093/nar/gkw865
17	59677061	C	T	CLTC	DD	https://doi.org/10.1038/nature21062		1	236891300	A	G	MTR	NDD	https://doi.org/10.1016/j.cell.2019.12.036;https://doi.org/10.1093/nar/gkw865
8	60742829	C	T	CHD7	DD	https://doi.org/10.1038/nature21062		1	243505296	G	A	AKT3	NDD	https://doi.org/10.1016/j.cell.2019.12.036;https://doi.org/10.1093/nar/gkw865
2	60546213	C	A	BCL11A	DD	https://doi.org/10.1038/nature21062		1	244055165	G	A	ZBTB18	NDD	https://doi.org/10.1016/j.cell.2019.12.036;https://doi.org/10.1093/nar/gkw865
2	60546158	G	T	BCL11A	DD	https://doi.org/10.1038/nature21062		1	244055257	C	G	ZBTB18	NDD	https://doi.org/10.1016/j.cell.2019.12.036;https://doi.org/10.1093/nar/gkw865
2	60546217	T	G	BCL11A	DD	https://doi.org/10.1038/nature21062		1	244863890	C	T	HNRNPU	NDD	https://doi.org/10.1016/j.cell.2019.12.036;https://doi.org/10.1093/nar/gkw865
X	41660507	G	A	CASK	DD	https://doi.org/10.1038/nature21062		10	248370	G	A	ZMYND11	NDD	https://doi.org/10.1016/j.cell.2019.12.036;https://doi.org/10.1093/nar/gkw865
X	41553884	G	A	CASK	DD	https://doi.org/10.1038/nature21062		10	248585	G	A	ZMYND11	NDD	https://doi.org/10.1016/j.cell.2019.12.036;https://doi.org/10.1093/nar/gkw865
12	49026481	A	C	KMT2D	DD	https://doi.org/10.1038/nature21062		10	252381	T	C	ZMYND11	NDD	https://doi.org/10.1016/j.cell.2019.12.036;https://doi.org/10.1093/nar/gkw865
1	210804149	T	C	KCNH1	DD	https://doi.org/10.1038/nature21062		10	252459	C	T	ZMYND11	NDD	https://doi.org/10.1016/j.cell.2019.12.036;https://doi.org/10.1093/nar/gkw865
20	49374387	T	G	KCNB1	DD	https://doi.org/10.1038/nature21062		10	3143449	G	A	PITRM1	NDD	https://doi.org/10.1093/nar/gkw865
9	83977032	C	T	HNRNPK	DD	https://doi.org/10.1038/nature21062		10	12081504	T	C	DHTKD1	NDD	https://doi.org/10.1093/nar/gkw865
14	105368112	G	A	PACS2	DD	https://doi.org/10.1038/nature21062		10	28617748	G	C	WAC	NDD	https://doi.org/10.1016/j.cell.2019.12.036;https://doi.org/10.1093/nar/gkw865
12	79353598	A	G	SYT1	DD	https://doi.org/10.1038/nature21062		10	49483383	C	T	ERCC6	NDD	https://doi.org/10.1093/nar/gkw865
12	79296219	G	A	SYT1	DD	https://doi.org/10.1038/nature21062		10	49530811	T	C	ERCC6	NDD	https://doi.org/10.1093/nar/gkw865
3	114351573	C	G	ZBTB20	DD	https://doi.org/10.1038/nature21062		10	49532703	G	C	ERCC6	NDD	https://doi.org/10.1016/j.cell.2019.12.036;https://doi.org/10.1093/nar/gkw865
7	39999467	G	A	CDK13	DD	https://doi.org/10.1038/nature21062		10	60067979	A	G	ANK3	NDD	https://doi.org/10.1016/j.cell.2019.12.036;https://doi.org/10.1093/nar/gkw865
7	140777011	C	T	BRAF	DD	https://doi.org/10.1038/nature21062		10	60068682	T	C	ANK3	NDD	https://doi.org/10.1016/j.cell.2019.12.036;https://doi.org/10.1093/nar/gkw865
7	140753333	T	A	BRAF	DD	https://doi.org/10.1038/nature21062		10	60070326	A	G	ANK3	NDD	https://doi.org/10.1016/j.cell.2019.12.036;https://doi.org/10.1093/nar/gkw865
X	10220837	C	T	CLCN4	DD	https://doi.org/10.1038/nature21062		10	60196564	A	G	ANK3	NDD	https://doi.org/10.1016/j.cell.2019.12.036;https://doi.org/10.1093/nar/gkw865
2	100006808	C	A	AFF3	DD	https://doi.org/10.1038/nature21062		10	60263887	T	C	ANK3	NDD	https://doi.org/10.1093/nar/gkw865
5	177293973	G	A	NSD1	DD	https://doi.org/10.1038/nature21062		10	69382555	C	T	HK1	NDD	https://doi.org/10.1016/j.cell.2019.12.036;https://doi.org/10.1093/nar/gkw865
7	6392034	C	T	RAC1	DD	https://doi.org/10.1038/nature21062		10	69382591	C	T	HK1	NDD	https://doi.org/10.1016/j.cell.2019.12.036;https://doi.org/10.1093/nar/gkw865
12	112477719	A	G	PTPN11	DD	https://doi.org/10.1038/nature21062		10	69382695	C	G	HK1	NDD	https://doi.org/10.1093/nar/gkw865
12	112489083	G	A	PTPN11	DD	https://doi.org/10.1038/nature21062		10	69389230	G	A	HK1	NDD	https://doi.org/10.1016/j.cell.2019.12.036;https://doi.org/10.1093/nar/gkw865
19	52212718	C	T	PPP2R1A	DD	https://doi.org/10.1038/nature21062		10	70844572	A	G	SGPL1	NDD	https://doi.org/10.1016/j.cell.2019.12.036;https://doi.org/10.1093/nar/gkw865
19	52212726	C	T	PPP2R1A	DD	https://doi.org/10.1038/nature21062		10	71828097	G	A	PSAP	NDD	https://doi.org/10.1016/j.cell.2019.12.036;https://doi.org/10.1093/nar/gkw865
12	6592481	T	C	CHD4	DD	https://doi.org/10.1038/nature21062		10	71851221	T	C	PSAP	NDD	https://doi.org/10.1093/nar/gkw865
12	6581131	C	T	CHD4	DD	https://doi.org/10.1038/nature21062		10	75029839	G	C	KAT6B	NDD	https://doi.org/10.1016/j.cell.2019.12.036;https://doi.org/10.1093/nar/gkw865
12	6591713	C	T	CHD4	DD	https://doi.org/10.1038/nature21062		10	75029865	G	A	KAT6B	NDD	https://doi.org/10.1016/j.cell.2019.12.036;https://doi.org/10.1093/nar/gkw865
17	7900706	C	T	CHD3	DD	https://doi.org/10.1038/nature21062		10	77039580	T	C	KCNMA1	NDD	https://doi.org/10.1016/j.cell.2019.12.036;https://doi.org/10.1093/nar/gkw865
17	7900707	G	C	CHD3	DD	https://doi.org/10.1038/nature21062		10	77110181	C	T	KCNMA1	NDD	https://doi.org/10.1016/j.cell.2019.12.036;https://doi.org/10.1093/nar/gkw865
17	7902719	G	C	CHD3	DD	https://doi.org/10.1038/nature21062		10	77110190	A	C	KCNMA1	NDD	https://doi.org/10.1093/nar/gkw865
17	7903281	C	T	CHD3	DD	https://doi.org/10.1038/nature21062		10	77977543	G	A	POLR3A	NDD	https://doi.org/10.1016/j.cell.2019.12.036;https://doi.org/10.1093/nar/gkw865
17	7903291	G	A	CHD3	DD	https://doi.org/10.1038/nature21062		10	79292298	C	T	ZMIZ1	NDD	https://doi.org/10.1016/j.cell.2019.12.036;https://doi.org/10.1093/nar/gkw865
3	11017398	G	A	SLC6A1	DD	https://doi.org/10.1038/nature21062		10	80276398	C	T	MAT1A	NDD	https://doi.org/10.1016/j.cell.2019.12.036;https://doi.org/10.1093/nar/gkw865
10	129957282	G	A	EBF3	DD	https://doi.org/10.1038/nature21062		10	87059266	T	C	GLUD1	NDD	https://doi.org/10.1093/nar/gkw865
2	26727747	C	G	KCNK3	DD	https://doi.org/10.1038/nature21062		10	87792665	T	C	ATAD1	NDD	https://doi.org/10.1093/nar/gkw865
10	92630204	A	G	KIF11	DD	https://doi.org/10.1038/nature21062		10	87933061	T	C	PTEN	NDD	https://doi.org/10.1093/nar/gkw865
3	11025836	G	A	SLC6A1	DD	https://doi.org/10.1038/nature21062		10	87933079	A	T	PTEN	NDD	https://doi.org/10.1093/nar/gkw865
2	196217018	C	T	HECW2	DD	https://doi.org/10.1038/nature21062		10	87933179	A	C	PTEN	NDD	https://doi.org/10.1016/j.cell.2019.12.036;https://doi.org/10.1093/nar/gkw865
2	229767637	G	T	TRIP12	DD	https://doi.org/10.1038/nature21062		10	87952235	C	T	PTEN	NDD	https://doi.org/10.1093/nar/gkw865
5	93585330	T	C	NR2F1	DD	https://doi.org/10.1038/nature21062		10	87957941	T	G	PTEN	NDD	https://doi.org/10.1093/nar/gkw865
3	4645678	C	T	ITPR1	DD	https://doi.org/10.1038/nature21062		10	87957955	C	T	PTEN	NDD	https://doi.org/10.1093/nar/gkw865
3	4645672	A	G	ITPR1	DD	https://doi.org/10.1038/nature21062		10	87960896	C	A	PTEN	NDD	https://doi.org/10.1093/nar/gkw865
3	4814521	G	A	ITPR1	DD	https://doi.org/10.1038/nature21062		10	92630204	A	G	KIF11	NDD	https://doi.org/10.1016/j.cell.2019.12.036;https://doi.org/10.1093/nar/gkw865
1	11157246	C	T	MTOR	DD	https://doi.org/10.1038/nature21062		10	93515540	A	C	CEP55	NDD	https://doi.org/10.1093/nar/gkw865
3	11025852	A	T	SLC6A1	DD	https://doi.org/10.1038/nature21062		10	93797503	G	T	LGI1	NDD	https://doi.org/10.1093/nar/gkw865
3	11017341	C	T	SLC6A1	DD	https://doi.org/10.1038/nature21062		10	95683148	T	A	TCTN3	NDD	https://doi.org/10.1016/j.cell.2019.12.036;https://doi.org/10.1093/nar/gkw865
3	11017935	G	A	SLC6A1	DD	https://doi.org/10.1038/nature21062		10	99718380	T	C	COX15	NDD	https://doi.org/10.1016/j.cell.2019.12.036;https://doi.org/10.1093/nar/gkw865
5	161334754	A	G	GABRB2	DD	https://doi.org/10.1038/nature21062		10	99721005	A	G	COX15	NDD	https://doi.org/10.1016/j.cell.2019.12.036;https://doi.org/10.1093/nar/gkw865
X	153932073	A	T	NAA10	DD	https://doi.org/10.1038/nature21062		10	102644789	G	A	TRIM8	NDD	https://doi.org/10.1016/j.cell.2019.12.036;https://doi.org/10.1093/nar/gkw865
1	226065771	G	C	H3F3A	DD	https://doi.org/10.1038/nature21062		10	103076143	G	A	CNNM2	NDD	https://doi.org/10.1093/nar/gkw865
X	71559365	T	A	OGT	DD	https://doi.org/10.1038/nature21062		10	103094361	C	T	NT5C2	NDD	https://doi.org/10.1093/nar/gkw865
8	60820050	G	A	CHD7	DD	https://doi.org/10.1038/nature21062		10	110575375	G	A	SMC3	NDD	https://doi.org/10.1093/nar/gkw865
22	42211789	T	G	TCF20	DD	https://doi.org/10.1038/nature21062		10	110593202	A	G	SMC3	NDD	https://doi.org/10.1016/j.cell.2019.12.036;https://doi.org/10.1093/nar/gkw865
19	11023591	G	A	SMARCA4	DD	https://doi.org/10.1038/nature21062		10	110602108	A	T	SMC3	NDD	https://doi.org/10.1093/nar/gkw865
19	11021729	G	A	SMARCA4	DD	https://doi.org/10.1038/nature21062		10	110602966	C	G	SMC3	NDD	https://doi.org/10.1016/j.cell.2019.12.036;https://doi.org/10.1093/nar/gkw865
20	63495909	C	T	EEF1A2	DD	https://doi.org/10.1038/nature21062		10	110603271	G	C	SMC3	NDD	https://doi.org/10.1016/j.cell.2019.12.036;https://doi.org/10.1093/nar/gkw865
20	63493155	C	G	EEF1A2	DD	https://doi.org/10.1038/nature21062		10	110964362	A	G	SHOC2	NDD	https://doi.org/10.1016/j.cell.2019.12.036;https://doi.org/10.1093/nar/gkw865
7	93103154	G	A	SAMD9	DD	https://doi.org/10.1038/nature21062		10	113143974	C	T	TCF7L2	NDD	https://doi.org/10.1016/j.cell.2019.12.036;https://doi.org/10.1093/nar/gkw865
16	56275989	T	G	GNAO1	DD	https://doi.org/10.1038/nature21062		10	113151866	C	G	TCF7L2	NDD	https://doi.org/10.1016/j.cell.2019.12.036;https://doi.org/10.1093/nar/gkw865
7	40001930	G	A	CDK13	DD	https://doi.org/10.1038/nature21062		10	117283284	G	A	PDZD8	NDD	https://doi.org/10.1093/nar/gkw865
2	196225800	G	A	HECW2	DD	https://doi.org/10.1038/nature21062		10	117283756	G	A	PDZD8	NDD	https://doi.org/10.1093/nar/gkw865
2	196322568	T	C	HECW2	DD	https://doi.org/10.1038/nature21062		10	117284887	C	T	PDZD8	NDD	https://doi.org/10.1093/nar/gkw865
2	196240545	T	A	HECW2	DD	https://doi.org/10.1038/nature21062		10	117285457	A	G	PDZD8	NDD	https://doi.org/10.1093/nar/gkw865
7	40047856	G	A	CDK13	DD	https://doi.org/10.1038/nature21062		10	119146321	A	G	SFXN4	NDD	https://doi.org/10.1093/nar/gkw865
9	127682489	G	T	STXBP1	DD	https://doi.org/10.1038/nature21062		10	129877825	C	A	EBF3	NDD	https://doi.org/10.1016/j.cell.2019.12.036;https://doi.org/10.1093/nar/gkw865
X	53405113	G	A	SMC1A	DD	https://doi.org/10.1038/nature21062		10	129957282	G	A	EBF3	NDD	https://doi.org/10.1016/j.cell.2019.12.036;https://doi.org/10.1093/nar/gkw865
7	152150989	T	C	KMT2C	DD	https://doi.org/10.1038/nature21062		10	133279774	C	T	TUBGCP2	NDD	https://doi.org/10.1016/j.cell.2019.12.036;https://doi.org/10.1093/nar/gkw865
2	1912023	C	T	MYT1L	DD	https://doi.org/10.1038/nature21062		10	133282242	C	G	TUBGCP2	NDD	https://doi.org/10.1093/nar/gkw865
2	1912051	G	A	MYT1L	DD	https://doi.org/10.1038/nature21062		10	133293063	T	C	TUBGCP2	NDD	https://doi.org/10.1093/nar/gkw865
8	132137928	C	T	KCNQ3	DD	https://doi.org/10.1038/nature21062		10	133302941	T	C	TUBGCP2	NDD	https://doi.org/10.1093/nar/gkw865
8	132172672	C	T	KCNQ3	DD	https://doi.org/10.1038/nature21062		11	679759	G	A	DEAF1	NDD	https://doi.org/10.1093/nar/gkw865
8	132180254	C	T	KCNQ3	DD	https://doi.org/10.1038/nature21062		11	681082	G	A	DEAF1	NDD	https://doi.org/10.1016/j.cell.2019.12.036;https://doi.org/10.1093/nar/gkw865
X	71408062	G	A	TAF1	DD	https://doi.org/10.1038/nature21062		11	686871	T	C	DEAF1	NDD	https://doi.org/10.1016/j.cell.2019.12.036;https://doi.org/10.1093/nar/gkw865
1	224424520	A	C	WDR26	DD	https://doi.org/10.1038/nature21062		11	686871	T	G	DEAF1	NDD	https://doi.org/10.1016/j.cell.2019.12.036;https://doi.org/10.1093/nar/gkw865
2	148947018	G	A	KIF5C	DD	https://doi.org/10.1038/nature21062		11	687917	C	T	DEAF1	NDD	https://doi.org/10.1093/nar/gkw865
X	72495227	A	G	HDAC8	DD	https://doi.org/10.1038/nature21062		11	687953	G	A	DEAF1	NDD	https://doi.org/10.1093/nar/gkw865
7	39999458	G	C	CDK13	DD	https://doi.org/10.1038/nature21062		11	1443625	G	A	BRSK2	NDD	https://doi.org/10.1016/j.cell.2019.12.036;https://doi.org/10.1093/nar/gkw865
7	40001879	A	G	CDK13	DD	https://doi.org/10.1038/nature21062		11	3808296	A	G	PGAP2	NDD	https://doi.org/10.1016/j.cell.2019.12.036;https://doi.org/10.1093/nar/gkw865
7	40062845	G	T	CDK13	DD	https://doi.org/10.1038/nature21062		11	6391469	C	A	SMPD1	NDD	https://doi.org/10.1093/nar/gkw865
21	33554788	A	G	SON	DD	https://doi.org/10.1038/nature21062		11	6629493	C	T	DCHS1	NDD	https://doi.org/10.1093/nar/gkw865
12	13567164	C	G	GRIN2B	DD	https://doi.org/10.1038/nature21062		11	6631680	A	C	DCHS1	NDD	https://doi.org/10.1016/j.cell.2019.12.036;https://doi.org/10.1093/nar/gkw865
15	75414301	G	A	SIN3A	DD	https://doi.org/10.1038/nature21062		11	6632544	C	T	DCHS1	NDD	https://doi.org/10.1093/nar/gkw865
17	1656728	C	T	PRPF8	DD	https://doi.org/10.1038/nature21062		11	7992127	A	C	EIF3F	NDD	https://doi.org/10.1016/j.cell.2019.12.036;https://doi.org/10.1093/nar/gkw865
17	42513949	G	A	ATP6V0A1	DD	https://doi.org/10.1038/nature21062		11	9141973	C	T	DENND5A	NDD	https://doi.org/10.1093/nar/gkw865
12	48833497	C	T	DDX23	DD	https://doi.org/10.1038/nature21062		11	9144165	G	A	DENND5A	NDD	https://doi.org/10.1093/nar/gkw865
12	48833498	G	A	DDX23	DD	https://doi.org/10.1038/nature21062		11	9150717	T	C	DENND5A	NDD	https://doi.org/10.1093/nar/gkw865
19	55661173	C	T	U2AF2	DD	https://doi.org/10.1038/nature21062		11	10764428	G	A	CTR9	NDD	https://doi.org/10.1016/j.cell.2019.12.036;https://doi.org/10.1093/nar/gkw865
X	153932410	G	A	NAA10	DD	https://doi.org/10.1038/nature21062		11	10772563	C	T	CTR9	NDD	https://doi.org/10.1093/nar/gkw865
15	26561095	A	G	GABRB3	DD	https://doi.org/10.1038/nature21062		11	10772590	C	T	CTR9	NDD	https://doi.org/10.1016/j.cell.2019.12.036;https://doi.org/10.1093/nar/gkw865
2	165991510	A	C	SCN1A	DD	https://doi.org/10.1038/nature21062		11	17772343	G	T	KCNC1	NDD	https://doi.org/10.1093/nar/gkw865
2	32154420	T	G	SPAST	DD	https://doi.org/10.1038/nature21062		11	17772356	C	T	KCNC1	NDD	https://doi.org/10.1016/j.cell.2019.12.036;https://doi.org/10.1093/nar/gkw865
2	104856595	G	T	POU3F3	DD	https://doi.org/10.1038/nature21062		11	34090575	T	C	CAPRIN1	NDD	https://doi.org/10.1016/j.cell.2019.12.036;https://doi.org/10.1093/nar/gkw865
6	90553481	C	T	MAP3K7	DD	https://doi.org/10.1038/nature21062		11	34984697	A	G	PDHX	NDD	https://doi.org/10.1093/nar/gkw865
10	28617748	G	C	WAC	DD	https://doi.org/10.1038/nature21062		11	35292512	G	C	SLC1A2	NDD	https://doi.org/10.1016/j.cell.2019.12.036;https://doi.org/10.1093/nar/gkw865
17	17794419	G	A	RAI1	DD	https://doi.org/10.1038/nature21062		11	35315089	C	T	SLC1A2	NDD	https://doi.org/10.1093/nar/gkw865
1	7737315	C	T	CAMTA1	DD	https://doi.org/10.1038/nature21062		11	44108137	A	G	EXT2	NDD	https://doi.org/10.1093/nar/gkw865
X	49038417	G	A	TFE3	DD	https://doi.org/10.1038/nature21062		11	44197862	C	T	EXT2	NDD	https://doi.org/10.1093/nar/gkw865
X	49039303	C	T	TFE3	DD	https://doi.org/10.1038/nature21062		11	44236314	A	G	EXT2	NDD	https://doi.org/10.1016/j.cell.2019.12.036;https://doi.org/10.1093/nar/gkw865
7	6392006	T	G	RAC1	DD	https://doi.org/10.1038/nature21062		11	45806016	C	G	SLC35C1	NDD	https://doi.org/10.1093/nar/gkw865
7	6391967	G	A	RAC1	DD	https://doi.org/10.1038/nature21062		11	47274634	A	G	MADD	NDD	https://doi.org/10.1016/j.cell.2019.12.036;https://doi.org/10.1093/nar/gkw865
8	23007600	C	G	RHOBTB2	DD	https://doi.org/10.1038/nature21062		11	47295972	G	A	MADD	NDD	https://doi.org/10.1016/j.cell.2019.12.036;https://doi.org/10.1093/nar/gkw865
3	192335434	C	T	FGF12	DD	https://doi.org/10.1038/nature21062		11	57660982	G	T	CLP1	NDD	https://doi.org/10.1093/nar/gkw865
17	59666643	A	G	CLTC	DD	https://doi.org/10.1038/s41586-020-2832-5		11	57796782	G	T	CTNND1	NDD	https://doi.org/10.1093/nar/gkw865
1	226065777	C	T	H3F3A	DD	https://doi.org/10.1038/s41586-020-2832-5		11	61314101	G	A	DDB1	NDD	https://doi.org/10.1093/nar/gkw865
14	28767883	C	T	FOXG1	DD	https://doi.org/10.1038/s41586-020-2832-5		11	61323036	C	A	DDB1	NDD	https://doi.org/10.1016/j.cell.2019.12.036;https://doi.org/10.1093/nar/gkw865
6	157110561	G	T	ARID1B	DD	https://doi.org/10.1038/s41586-020-2832-5		11	62690678	C	T	BSCL2	NDD	https://doi.org/10.1093/nar/gkw865
2	240786491	C	T	KIF1A	DD	https://doi.org/10.1038/s41586-020-2832-5		11	63895584	C	T	MARK2	NDD	https://doi.org/10.1016/j.cell.2019.12.036;https://doi.org/10.1093/nar/gkw865
6	26156821	C	T	HIST1H1E	DD	https://doi.org/10.1038/s41586-020-2832-5		11	63899077	A	C	MARK2	NDD	https://doi.org/10.1093/nar/gkw865
3	4645678	C	T	ITPR1	DD	https://doi.org/10.1038/s41586-020-2832-5		11	64296975	T	C	KCNK4	NDD	https://doi.org/10.1093/nar/gkw865
16	3738633	G	T	CREBBP	DD	https://doi.org/10.1038/s41586-020-2832-5		11	65346332	C	G	DPF2	NDD	https://doi.org/10.1016/j.cell.2019.12.036;https://doi.org/10.1093/nar/gkw865
14	101995022	C	T	DYNC1H1	DD	https://doi.org/10.1038/s41586-020-2832-5		11	65348881	G	A	DPF2	NDD	https://doi.org/10.1016/j.cell.2019.12.036;https://doi.org/10.1093/nar/gkw865
12	115982536	G	C	MED13L	DD	https://doi.org/10.1038/s41586-020-2832-5		11	65537824	G	C	SCYL1	NDD	https://doi.org/10.1093/nar/gkw865
22	20991686	C	T	LZTR1	DD	https://doi.org/10.1038/s41586-020-2832-5		11	65538552	C	T	SCYL1	NDD	https://doi.org/10.1093/nar/gkw865
22	50730948	C	G	SHANK3	DD	https://doi.org/10.1038/s41586-020-2832-5		11	65718935	A	G	KAT5	NDD	https://doi.org/10.1093/nar/gkw865
4	1804426	C	A	FGFR3	DD	https://doi.org/10.1038/s41586-020-2832-5		11	65884620	G	C	FIBP	NDD	https://doi.org/10.1016/j.cell.2019.12.036;https://doi.org/10.1093/nar/gkw865
1	15928377	C	T	SPEN	DD	https://doi.org/10.1038/s41586-020-2832-5		11	66211206	C	T	PACS1	NDD	https://doi.org/10.1016/j.cell.2019.12.036;https://doi.org/10.1093/nar/gkw865
9	128609216	G	A	SPTAN1	DD	https://doi.org/10.1038/s41586-020-2832-5		11	66230936	C	T	PACS1	NDD	https://doi.org/10.1093/nar/gkw865
2	165388952	T	C	SCN2A	DD	https://doi.org/10.1038/s41586-020-2832-5		11	66235394	G	A	PACS1	NDD	https://doi.org/10.1093/nar/gkw865
2	165387005	T	C	SCN2A	DD	https://doi.org/10.1038/s41586-020-2832-5		11	66685899	C	T	SPTBN2	NDD	https://doi.org/10.1093/nar/gkw865
2	165992113	G	T	SCN1A	DD	https://doi.org/10.1038/s41586-020-2832-5		11	66686013	C	T	SPTBN2	NDD	https://doi.org/10.1093/nar/gkw865
19	41970405	C	T	ATP1A3	DD	https://doi.org/10.1038/s41586-020-2832-5		11	66707731	G	A	SPTBN2	NDD	https://doi.org/10.1016/j.cell.2019.12.036;https://doi.org/10.1093/nar/gkw865
2	148929338	A	G	KIF5C	DD	https://doi.org/10.1038/s41586-020-2832-5		11	66710990	G	T	SPTBN2	NDD	https://doi.org/10.1016/j.cell.2019.12.036;https://doi.org/10.1093/nar/gkw865
9	121190638	G	A	RAB14	DD	https://doi.org/10.1038/s41586-020-2832-5		11	66714398	T	G	SPTBN2	NDD	https://doi.org/10.1016/j.cell.2019.12.036;https://doi.org/10.1093/nar/gkw865
14	101979951	C	T	DYNC1H1	DD	https://doi.org/10.1038/s41586-020-2832-5		11	68064622	T	C	CHKA	NDD	https://doi.org/10.1093/nar/gkw865
16	3767731	G	A	CREBBP	DD	https://doi.org/10.1038/s41586-020-2832-5		11	70473228	C	T	SHANK2	NDD	https://doi.org/10.1093/nar/gkw865
9	135768865	G	A	KCNT1	DD	https://doi.org/10.1038/s41586-020-2832-5		11	70661639	T	G	SHANK2	NDD	https://doi.org/10.1016/j.cell.2019.12.036;https://doi.org/10.1093/nar/gkw865
9	137163794	G	A	GRIN1	DD	https://doi.org/10.1038/s41586-020-2832-5		11	72434160	G	A	CLPB	NDD	https://doi.org/10.1093/nar/gkw865
12	112419116	C	T	PTPN11	DD	https://doi.org/10.1038/s41586-020-2832-5		11	74049460	G	T	C2CD3	NDD	https://doi.org/10.1093/nar/gkw865
3	4645673	C	T	ITPR1	DD	https://doi.org/10.1038/s41586-020-2832-5		11	74098199	T	C	C2CD3	NDD	https://doi.org/10.1093/nar/gkw865
3	136151443	G	A	MSL2	DD	https://doi.org/10.1038/s41586-020-2832-5		11	74123067	C	T	C2CD3	NDD	https://doi.org/10.1016/j.cell.2019.12.036;https://doi.org/10.1093/nar/gkw865
18	55254529	C	T	TCF4	DD	https://doi.org/10.1038/s41586-020-2832-5		11	77332782	C	T	PAK1	NDD	https://doi.org/10.1016/j.cell.2019.12.036;https://doi.org/10.1093/nar/gkw865
10	92593431	T	A	KIF11	DD	https://doi.org/10.1038/s41586-020-2832-5		11	78493163	G	C	NARS2	NDD	https://doi.org/10.1093/nar/gkw865
16	9829502	G	C	GRIN2A	DD	https://doi.org/10.1038/s41586-020-2832-5		11	78493165	CGG	GAA	NARS2	NDD	https://doi.org/10.1093/nar/gkw865
3	113788822	G	A	ATP6V1A	DD	https://doi.org/10.1038/s41586-020-2832-5		11	86278428	G	C	EED	NDD	https://doi.org/10.1016/j.cell.2019.12.036;https://doi.org/10.1093/nar/gkw865
16	3729680	G	C	CREBBP	DD	https://doi.org/10.1038/s41586-020-2832-5		11	96384738	C	T	CCDC82	NDD	https://doi.org/10.1093/nar/gkw865
3	70977678	T	C	FOXP1	DD	https://doi.org/10.1038/s41586-020-2832-5		11	105926821	C	A	GRIA4	NDD	https://doi.org/10.1016/j.cell.2019.12.036;https://doi.org/10.1093/nar/gkw865
22	41176250	T	G	EP300	DD	https://doi.org/10.1038/s41586-020-2832-5		11	105974392	T	C	GRIA4	NDD	https://doi.org/10.1093/nar/gkw865
19	18860327	G	A	UPF1	DD	https://doi.org/10.1038/s41586-020-2832-5		11	107505016	C	T	ALKBH8	NDD	https://doi.org/10.1016/j.cell.2019.12.036;https://doi.org/10.1093/nar/gkw865
7	93102220	C	T	SAMD9	DD	https://doi.org/10.1038/s41586-020-2832-5		11	107553166	A	C	ALKBH8	NDD	https://doi.org/10.1093/nar/gkw865
6	7568555	T	G	DSP	DD	https://doi.org/10.1038/s41586-020-2832-5		11	107553871	T	A	ALKBH8	NDD	https://doi.org/10.1016/j.cell.2019.12.036;https://doi.org/10.1093/nar/gkw865
1	26460077	C	G	DHDDS	DD	https://doi.org/10.1038/s41586-020-2832-5		11	108249096	T	C	ATM	NDD	https://doi.org/10.1093/nar/gkw865
14	102027622	C	T	DYNC1H1	DD	https://doi.org/10.1038/s41586-020-2832-5		11	108253854	G	A	ATM	NDD	https://doi.org/10.1016/j.cell.2019.12.036;https://doi.org/10.1093/nar/gkw865
3	113784320	A	G	ATP6V1A	DD	https://doi.org/10.1038/s41586-020-2832-5		11	108253983	C	G	ATM	NDD	https://doi.org/10.1093/nar/gkw865
3	4733125	A	G	ITPR1	DD	https://doi.org/10.1038/s41586-020-2832-5		11	108259071	G	A	ATM	NDD	https://doi.org/10.1093/nar/gkw865
12	112450394	G	A	PTPN11	DD	https://doi.org/10.1038/s41586-020-2832-5		11	108279502	A	T	ATM	NDD	https://doi.org/10.1016/j.cell.2019.12.036;https://doi.org/10.1093/nar/gkw865
20	492282	T	C	CSNK2A1	DD	https://doi.org/10.1038/s41586-020-2832-5		11	108279553	A	G	ATM	NDD	https://doi.org/10.1093/nar/gkw865
3	113795883	C	T	ATP6V1A	DD	https://doi.org/10.1038/s41586-020-2832-5		11	118474103	T	A	KMT2A	NDD	https://doi.org/10.1093/nar/gkw865
10	8073785	A	T	GATA3	DD	https://doi.org/10.1038/s41586-020-2832-5		11	118477970	A	G	KMT2A	NDD	https://doi.org/10.1016/j.cell.2019.12.036;https://doi.org/10.1093/nar/gkw865
5	14374235	A	C	TRIO	DD	https://doi.org/10.1038/s41586-020-2832-5		11	118478092	C	T	KMT2A	NDD	https://doi.org/10.1093/nar/gkw865
X	10213768	C	T	CLCN4	DD	https://doi.org/10.1038/s41586-020-2832-5		11	118478188	A	G	KMT2A	NDD	https://doi.org/10.1016/j.cell.2019.12.036;https://doi.org/10.1093/nar/gkw865
8	132180254	C	T	KCNQ3	DD	https://doi.org/10.1038/s41586-020-2832-5		11	118497943	G	T	KMT2A	NDD	https://doi.org/10.1016/j.cell.2019.12.036;https://doi.org/10.1093/nar/gkw865
15	48427639	A	G	FBN1	DD	https://doi.org/10.1038/s41586-020-2832-5		11	118503573	C	A	KMT2A	NDD	https://doi.org/10.1093/nar/gkw865
3	70972666	C	T	FOXP1	DD	https://doi.org/10.1038/s41586-020-2832-5		11	118504423	G	T	KMT2A	NDD	https://doi.org/10.1016/j.cell.2019.12.036;https://doi.org/10.1093/nar/gkw865
2	28776944	C	G	PPP1CB	DD	https://doi.org/10.1038/s41586-020-2832-5		11	118504469	T	A	KMT2A	NDD	https://doi.org/10.1016/j.cell.2019.12.036;https://doi.org/10.1093/nar/gkw865
7	140749365	A	C	BRAF	DD	https://doi.org/10.1038/s41586-020-2832-5		11	119078632	A	G	VPS11	NDD	https://doi.org/10.1093/nar/gkw865
12	13615537	G	A	GRIN2B	DD	https://doi.org/10.1038/s41586-020-2832-5		11	119078871	G	A	VPS11	NDD	https://doi.org/10.1093/nar/gkw865
19	46919942	C	A	ARHGAP35	DD	https://doi.org/10.1038/s41586-020-2832-5		11	119278170	A	G	CBL	NDD	https://doi.org/10.1016/j.cell.2019.12.036;https://doi.org/10.1093/nar/gkw865
4	1804516	G	A	FGFR3	DD	https://doi.org/10.1038/s41586-020-2832-5		11	119278204	C	A	CBL	NDD	https://doi.org/10.1093/nar/gkw865
18	45038489	G	T	SETBP1	DD	https://doi.org/10.1038/s41586-020-2832-5		11	119278215	A	T	CBL	NDD	https://doi.org/10.1016/j.cell.2019.12.036;https://doi.org/10.1093/nar/gkw865
11	686992	G	A	DEAF1	DD	https://doi.org/10.1038/s41586-020-2832-5		11	119299540	T	C	CBL	NDD	https://doi.org/10.1016/j.cell.2019.12.036;https://doi.org/10.1093/nar/gkw865
17	7903288	A	G	CHD3	DD	https://doi.org/10.1038/s41586-020-2832-5		11	121307363	G	A	SC5D	NDD	https://doi.org/10.1016/j.cell.2019.12.036;https://doi.org/10.1093/nar/gkw865
X	154031431	G	A	MECP2	DD	https://doi.org/10.1038/s41586-020-2832-5		11	124756248	C	G	ESAM	NDD	https://doi.org/10.1093/nar/gkw865
20	63433848	C	G	KCNQ2	DD	https://doi.org/10.1038/s41586-020-2832-5		11	124923801	C	T	HEPACAM	NDD	https://doi.org/10.1093/nar/gkw865
19	18853281	T	G	UPF1	DD	https://doi.org/10.1038/s41586-020-2832-5		11	124923890	T	C	HEPACAM	NDD	https://doi.org/10.1093/nar/gkw865
7	80188975	C	T	GNAI1	DD	https://doi.org/10.1038/s41586-020-2832-5		11	124923933	A	G	HEPACAM	NDD	https://doi.org/10.1016/j.cell.2019.12.036;https://doi.org/10.1093/nar/gkw865
13	26393389	A	G	CDK8	DD	https://doi.org/10.1038/s41586-020-2832-5		11	124924742	T	C	HEPACAM	NDD	https://doi.org/10.1093/nar/gkw865
X	45070032	G	A	KDM6A	DD	https://doi.org/10.1038/s41586-020-2832-5		11	125895523	C	G	PUS3	NDD	https://doi.org/10.1093/nar/gkw865
12	6593492	C	T	CHD4	DD	https://doi.org/10.1038/s41586-020-2832-5		11	125961811	G	A	CDON	NDD	https://doi.org/10.1093/nar/gkw865
X	154031425	T	C	MECP2	DD	https://doi.org/10.1038/s41586-020-2832-5		11	125994290	C	T	CDON	NDD	https://doi.org/10.1093/nar/gkw865
1	111787015	G	A	KCND3	DD	https://doi.org/10.1038/s41586-020-2832-5		11	126015483	T	C	CDON	NDD	https://doi.org/10.1093/nar/gkw865
7	140801487	T	C	BRAF	DD	https://doi.org/10.1038/s41586-020-2832-5		11	126269213	C	T	FOXRED1	NDD	https://doi.org/10.1093/nar/gkw865
10	87933061	T	C	PTEN	DD	https://doi.org/10.1038/s41586-020-2832-5		11	126271449	A	G	FOXRED1	NDD	https://doi.org/10.1093/nar/gkw865
12	2664835	G	A	CACNA1C	DD	https://doi.org/10.1038/s41586-020-2832-5		11	126431415	G	A	KIRREL3	NDD	https://doi.org/10.1093/nar/gkw865
1	164792559	A	G	PBX1	DD	https://doi.org/10.1038/s41586-020-2832-5		11	126463285	C	T	KIRREL3	NDD	https://doi.org/10.1093/nar/gkw865
1	202749129	C	A	KDM5B	DD	https://doi.org/10.1038/s41586-020-2832-5		11	126473418	C	T	KIRREL3	NDD	https://doi.org/10.1093/nar/gkw865
10	69382555	C	T	HK1	DD	https://doi.org/10.1038/s41586-020-2832-5		12	293103	G	A	KDM5A	NDD	https://doi.org/10.1093/nar/gkw865
5	88823786	C	G	MEF2C	DD	https://doi.org/10.1038/s41586-020-2832-5		12	295682	A	C	KDM5A	NDD	https://doi.org/10.1093/nar/gkw865
19	11023594	G	A	SMARCA4	DD	https://doi.org/10.1038/s41586-020-2832-5		12	307611	T	C	KDM5A	NDD	https://doi.org/10.1093/nar/gkw865
1	26457880	G	A	DHDDS	DD	https://doi.org/10.1038/s41586-020-2832-5		12	2608591	T	C	CACNA1C	NDD	https://doi.org/10.1093/nar/gkw865
16	70496367	C	T	COG4	DD	https://doi.org/10.1038/s41586-020-2832-5		12	2611933	G	A	CACNA1C	NDD	https://doi.org/10.1093/nar/gkw865
9	127668160	G	C	STXBP1	DD	https://doi.org/10.1038/s41586-020-2832-5		12	2633654	T	A	CACNA1C	NDD	https://doi.org/10.1093/nar/gkw865
14	102033982	C	T	DYNC1H1	DD	https://doi.org/10.1038/s41586-020-2832-5		12	2665599	G	C	CACNA1C	NDD	https://doi.org/10.1016/j.cell.2019.12.036;https://doi.org/10.1093/nar/gkw865
1	151412385	T	A	POGZ	DD	https://doi.org/10.1038/s41586-020-2832-5		12	4299980	C	G	CCND2	NDD	https://doi.org/10.1093/nar/gkw865
X	154030665	G	T	MECP2	DD	https://doi.org/10.1038/s41586-020-2832-5		12	4911892	G	A	KCNA1	NDD	https://doi.org/10.1016/j.cell.2019.12.036;https://doi.org/10.1093/nar/gkw865
11	66211206	C	T	PACS1	DD	https://doi.org/10.1038/s41586-020-2832-5		12	4912585	C	T	KCNA1	NDD	https://doi.org/10.1093/nar/gkw865
11	533919	A	G	HRAS	DD	https://doi.org/10.1038/s41586-020-2832-5		12	6581131	C	T	CHD4	NDD	https://doi.org/10.1016/j.cell.2019.12.036;https://doi.org/10.1093/nar/gkw865
X	40073962	C	A	BCOR	DD	https://doi.org/10.1038/s41586-020-2832-5		12	6583225	A	C	CHD4	NDD	https://doi.org/10.1093/nar/gkw865
12	32679412	A	G	DNM1L	DD	https://doi.org/10.1038/s41586-020-2832-5		12	6588383	C	T	CHD4	NDD	https://doi.org/10.1016/j.cell.2019.12.036;https://doi.org/10.1093/nar/gkw865
18	51078294	C	T	SMAD4	DD	https://doi.org/10.1038/s41586-020-2832-5		12	6591713	C	T	CHD4	NDD	https://doi.org/10.1016/j.cell.2019.12.036;https://doi.org/10.1093/nar/gkw865
17	44857126	G	A	EFTUD2	DD	https://doi.org/10.1038/s41586-020-2832-5		12	6592479	C	A	CHD4	NDD	https://doi.org/10.1093/nar/gkw865
15	36896672	C	T	MEIS2	DD	https://doi.org/10.1038/s41586-020-2832-5		12	6592481	T	C	CHD4	NDD	https://doi.org/10.1016/j.cell.2019.12.036;https://doi.org/10.1093/nar/gkw865
3	177050479	C	T	TBL1XR1	DD	https://doi.org/10.1038/s41586-020-2832-5		12	6593191	G	T	CHD4	NDD	https://doi.org/10.1016/j.cell.2019.12.036;https://doi.org/10.1093/nar/gkw865
14	105368112	G	A	PACS2	DD	https://doi.org/10.1038/s41586-020-2832-5		12	6596097	G	A	CHD4	NDD	https://doi.org/10.1016/j.cell.2019.12.036;https://doi.org/10.1093/nar/gkw865
17	7903860	T	C	CHD3	DD	https://doi.org/10.1038/s41586-020-2832-5		12	6599801	T	C	CHD4	NDD_control	https://doi.org/10.1093/nar/gkw865
20	492346	C	T	CSNK2A1	DD	https://doi.org/10.1038/s41586-020-2832-5		12	6599855	C	T	CHD4	NDD	https://doi.org/10.1016/j.cell.2019.12.036;https://doi.org/10.1093/nar/gkw865
16	89275137	C	T	ANKRD11	DD	https://doi.org/10.1038/s41586-020-2832-5		12	6600576	G	T	CHD4	NDD	https://doi.org/10.1093/nar/gkw865
16	67616808	G	A	CTCF	DD	https://doi.org/10.1038/s41586-020-2832-5		12	6939130	A	G	ATN1	NDD	https://doi.org/10.1016/j.cell.2019.12.036;https://doi.org/10.1093/nar/gkw865
21	45989129	G	A	COL6A1	DD	https://doi.org/10.1038/s41586-020-2832-5		12	6945798	A	G	C12orf57	NDD	https://doi.org/10.1016/j.cell.2019.12.036;https://doi.org/10.1093/nar/gkw865
9	137162510	G	C	GRIN1	DD	https://doi.org/10.1038/s41586-020-2832-5		12	13567164	C	G	GRIN2B	NDD	https://doi.org/10.1016/j.cell.2019.12.036;https://doi.org/10.1093/nar/gkw865
X	53647391	G	A	HUWE1	DD	https://doi.org/10.1038/s41586-020-2832-5		12	13567204	C	T	GRIN2B	NDD	https://doi.org/10.1016/j.cell.2019.12.036;https://doi.org/10.1093/nar/gkw865
2	5692958	C	G	SOX11	DD	https://doi.org/10.1038/s41586-020-2832-5		12	13571859	T	C	GRIN2B	NDD	https://doi.org/10.1016/j.cell.2019.12.036;https://doi.org/10.1093/nar/gkw865
2	240774189	G	A	KIF1A	DD	https://doi.org/10.1038/s41586-020-2832-5		12	13571910	C	T	GRIN2B	NDD	https://doi.org/10.1016/j.cell.2019.12.036;https://doi.org/10.1093/nar/gkw865
9	83972860	A	G	HNRNPK	DD	https://doi.org/10.1038/s41586-020-2832-5		12	13571915	G	C	GRIN2B	NDD	https://doi.org/10.1016/j.cell.2019.12.036;https://doi.org/10.1093/nar/gkw865
2	240769152	C	T	KIF1A	DD	https://doi.org/10.1038/s41586-020-2832-5		12	13608697	G	A	GRIN2B	NDD	https://doi.org/10.1093/nar/gkw865
12	13571931	G	A	GRIN2B	DD	https://doi.org/10.1038/s41586-020-2832-5		12	13608730	G	A	GRIN2B	NDD	https://doi.org/10.1016/j.cell.2019.12.036;https://doi.org/10.1093/nar/gkw865
5	93585446	C	G	NR2F1	DD	https://doi.org/10.1038/s41586-020-2832-5		12	13608768	G	C	GRIN2B	NDD	https://doi.org/10.1016/j.cell.2019.12.036;https://doi.org/10.1093/nar/gkw865
22	23834143	G	A	SMARCB1	DD	https://doi.org/10.1038/s41586-020-2832-5		12	13611833	C	T	GRIN2B	NDD	https://doi.org/10.1016/j.cell.2019.12.036;https://doi.org/10.1093/nar/gkw865
10	87952143	G	A	PTEN	DD	https://doi.org/10.1038/s41586-020-2832-5		12	13611847	G	A	GRIN2B	NDD	https://doi.org/10.1016/j.cell.2019.12.036;https://doi.org/10.1093/nar/gkw865
10	73849022	C	A	CAMK2G	DD	https://doi.org/10.1038/s41586-020-2832-5		12	13615195	A	C	GRIN2B	NDD	https://doi.org/10.1093/nar/gkw865
3	113789799	C	T	ATP6V1A	DD	https://doi.org/10.1038/s41586-020-2832-5		12	13615198	C	T	GRIN2B	NDD	https://doi.org/10.1016/j.cell.2019.12.036;https://doi.org/10.1093/nar/gkw865
2	199348709	G	A	SATB2	DD	https://doi.org/10.1038/s41586-020-2832-5		12	13615611	C	A	GRIN2B	NDD	https://doi.org/10.1093/nar/gkw865
10	1080436	C	T	WDR37	DD	https://doi.org/10.1038/s41586-020-2832-5		12	13616514	G	C	GRIN2B	NDD	https://doi.org/10.1093/nar/gkw865
8	60845063	G	A	CHD7	DD	https://doi.org/10.1038/s41586-020-2832-5		12	21842326	C	T	ABCC9	NDD	https://doi.org/10.1016/j.cell.2019.12.036;https://doi.org/10.1093/nar/gkw865
13	26337623	C	T	CDK8	DD	https://doi.org/10.1038/s41586-020-2832-5		12	21842327	G	A	ABCC9	NDD	https://doi.org/10.1093/nar/gkw865
1	244855029	C	G	HNRNPU	DD	https://doi.org/10.1038/s41586-020-2832-5		12	21844851	G	T	ABCC9	NDD	https://doi.org/10.1016/j.cell.2019.12.036;https://doi.org/10.1093/nar/gkw865
4	1805644	C	G	FGFR3	DD	https://doi.org/10.1038/s41586-020-2832-5		12	21844884	C	T	ABCC9	NDD	https://doi.org/10.1093/nar/gkw865
11	119278181	T	A	CBL	DD	https://doi.org/10.1038/s41586-020-2832-5		12	21908099	G	A	ABCC9	NDD	https://doi.org/10.1093/nar/gkw865
X	20188499	G	A	RPS6KA3	DD	https://doi.org/10.1038/s41586-020-2832-5		12	21908157	C	T	ABCC9	NDD	https://doi.org/10.1016/j.cell.2019.12.036;https://doi.org/10.1093/nar/gkw865
14	102015141	G	A	DYNC1H1	DD	https://doi.org/10.1038/s41586-020-2832-5		12	23536655	C	G	SOX5	NDD	https://doi.org/10.1016/j.cell.2019.12.036;https://doi.org/10.1093/nar/gkw865
2	148929341	C	A	KIF5C	DD	https://doi.org/10.1038/s41586-020-2832-5		12	23543271	G	A	SOX5	NDD	https://doi.org/10.1016/j.cell.2019.12.036;https://doi.org/10.1093/nar/gkw865
X	53405077	G	A	SMC1A	DD	https://doi.org/10.1038/s41586-020-2832-5		12	32731018	G	A	DNM1L	NDD	https://doi.org/10.1016/j.cell.2019.12.036;https://doi.org/10.1093/nar/gkw865
13	110179324	C	T	COL4A1	DD	https://doi.org/10.1038/s41586-020-2832-5		12	45850702	A	G	ARID2	NDD	https://doi.org/10.1093/nar/gkw865
19	11019610	G	A	SMARCA4	DD	https://doi.org/10.1038/s41586-020-2832-5		12	48833497	C	T	DDX23	NDD	https://doi.org/10.1016/j.cell.2019.12.036;https://doi.org/10.1093/nar/gkw865
9	95449263	C	A	PTCH1	DD	https://doi.org/10.1038/s41586-020-2832-5		12	48833498	G	A	DDX23	NDD	https://doi.org/10.1016/j.cell.2019.12.036;https://doi.org/10.1093/nar/gkw865
4	157321502	T	G	GRIA2	DD	https://doi.org/10.1038/s41586-020-2832-5		12	49022661	C	A	KMT2D	NDD	https://doi.org/10.1093/nar/gkw865
X	154031340	C	A	MECP2	DD	https://doi.org/10.1038/s41586-020-2832-5		12	49026481	A	C	KMT2D	NDD	https://doi.org/10.1016/j.cell.2019.12.036;https://doi.org/10.1093/nar/gkw865
3	11017882	C	T	SLC6A1	DD	https://doi.org/10.1038/s41586-020-2832-5		12	49032299	G	C	KMT2D	NDD	https://doi.org/10.1016/j.cell.2019.12.036;https://doi.org/10.1093/nar/gkw865
1	244860459	T	C	HNRNPU	DD	https://doi.org/10.1038/s41586-020-2832-5		12	49039610	C	T	KMT2D	NDD	https://doi.org/10.1093/nar/gkw865
X	19353105	G	A	PDHA1	DD	https://doi.org/10.1038/s41586-020-2832-5		12	49040949	G	A	KMT2D	NDD	https://doi.org/10.1016/j.cell.2019.12.036;https://doi.org/10.1093/nar/gkw865
12	32731362	C	T	DNM1L	DD	https://doi.org/10.1038/s41586-020-2832-5		12	49046756	C	G	KMT2D	NDD	https://doi.org/10.1016/j.cell.2019.12.036;https://doi.org/10.1093/nar/gkw865
6	31668544	G	A	CSNK2B	DD	https://doi.org/10.1038/s41586-020-2832-5		12	49050485	G	T	KMT2D	NDD	https://doi.org/10.1093/nar/gkw865
18	55228885	G	A	TCF4	DD	https://doi.org/10.1038/s41586-020-2832-5		12	49185444	G	A	TUBA1A	NDD	https://doi.org/10.1093/nar/gkw865
5	161895743	G	A	GABRA1	DD	https://doi.org/10.1038/s41586-020-2832-5		12	49185911	A	T	TUBA1A	NDD	https://doi.org/10.1093/nar/gkw865
11	684943	G	T	DEAF1	DD	https://doi.org/10.1038/s41586-020-2832-5		12	49186318	G	A	TUBA1A	NDD	https://doi.org/10.1093/nar/gkw865
X	53405388	C	T	SMC1A	DD	https://doi.org/10.1038/s41586-020-2832-5		12	49186402	C	A	TUBA1A	NDD	https://doi.org/10.1093/nar/gkw865
5	75419419	C	T	COL4A3BP	DD	https://doi.org/10.1038/s41586-020-2832-5		12	49186622	G	C	TUBA1A	NDD	https://doi.org/10.1016/j.cell.2019.12.036;https://doi.org/10.1093/nar/gkw865
12	13567164	C	G	GRIN2B	DD	https://doi.org/10.1038/s41586-020-2832-5		12	50098781	C	G	SMARCD1	NDD	https://doi.org/10.1016/j.cell.2019.12.036;https://doi.org/10.1093/nar/gkw865
12	51807100	C	T	SCN8A	DD	https://doi.org/10.1038/s41586-020-2832-5		12	50098804	T	C	SMARCD1	NDD	https://doi.org/10.1016/j.cell.2019.12.036;https://doi.org/10.1093/nar/gkw865
20	63413471	C	T	KCNQ2	DD	https://doi.org/10.1038/s41586-020-2832-5		12	51688784	G	A	SCN8A	NDD	https://doi.org/10.1016/j.cell.2019.12.036;https://doi.org/10.1093/nar/gkw865
5	140114182	A	G	PURA	DD	https://doi.org/10.1038/s41586-020-2832-5		12	51688786	A	G	SCN8A	NDD	https://doi.org/10.1016/j.cell.2019.12.036;https://doi.org/10.1093/nar/gkw865
1	35888555	G	T	AGO1	DD	https://doi.org/10.1038/s41586-020-2832-5		12	51705504	G	A	SCN8A	NDD	https://doi.org/10.1016/j.cell.2019.12.036;https://doi.org/10.1093/nar/gkw865
14	101964723	A	G	DYNC1H1	DD	https://doi.org/10.1038/s41586-020-2832-5		12	51705528	G	A	SCN8A	NDD	https://doi.org/10.1016/j.cell.2019.12.036;https://doi.org/10.1093/nar/gkw865
9	135768853	T	C	KCNT1	DD	https://doi.org/10.1038/s41586-020-2832-5		12	51765750	T	A	SCN8A	NDD	https://doi.org/10.1093/nar/gkw865
8	60854461	G	A	CHD7	DD	https://doi.org/10.1038/s41586-020-2832-5		12	51769111	G	A	SCN8A	NDD	https://doi.org/10.1093/nar/gkw865
7	40046007	A	G	CDK13	DD	https://doi.org/10.1038/s41586-020-2832-5		12	51780751	T	C	SCN8A	NDD	https://doi.org/10.1016/j.cell.2019.12.036;https://doi.org/10.1093/nar/gkw865
9	130884334	C	T	ABL1	DD	https://doi.org/10.1038/s41586-020-2832-5		12	51786566	G	C	SCN8A	NDD	https://doi.org/10.1016/j.cell.2019.12.036;https://doi.org/10.1093/nar/gkw865
3	123291367	C	T	ADCY5	DD	https://doi.org/10.1038/s41586-020-2832-5		12	51786566	G	T	SCN8A	NDD	https://doi.org/10.1016/j.cell.2019.12.036;https://doi.org/10.1093/nar/gkw865
7	12231904	G	A	TMEM106B	DD	https://doi.org/10.1038/s41586-020-2832-5		12	51789327	A	G	SCN8A	NDD	https://doi.org/10.1016/j.cell.2019.12.036;https://doi.org/10.1093/nar/gkw865
1	1806503	A	G	GNB1	DD	https://doi.org/10.1038/s41586-020-2832-5		12	51806336	G	A	SCN8A	NDD	https://doi.org/10.1016/j.cell.2019.12.036;https://doi.org/10.1093/nar/gkw865
2	240775889	C	T	KIF1A	DD	https://doi.org/10.1038/s41586-020-2832-5		12	51806359	G	A	SCN8A	NDD	https://doi.org/10.1016/j.cell.2019.12.036;https://doi.org/10.1093/nar/gkw865
4	1213028	G	A	CTBP1	DD	https://doi.org/10.1038/s41586-020-2832-5		12	51806521	G	A	SCN8A	NDD	https://doi.org/10.1093/nar/gkw865
16	9829596	C	T	GRIN2A	DD	https://doi.org/10.1038/s41586-020-2832-5		12	51806767	T	C	SCN8A	NDD	https://doi.org/10.1093/nar/gkw865
1	11996158	C	T	MFN2	DD	https://doi.org/10.1038/s41586-020-2832-5		12	51806788	A	G	SCN8A	NDD	https://doi.org/10.1093/nar/gkw865
15	92978358	C	A	CHD2	DD	https://doi.org/10.1038/s41586-020-2832-5		12	53307541	G	C	AAAS	NDD	https://doi.org/10.1093/nar/gkw865
15	66435109	A	C	MAP2K1	DD	https://doi.org/10.1038/s41586-020-2832-5		12	53309197	C	T	AAAS	NDD	https://doi.org/10.1093/nar/gkw865
12	13608706	G	A	GRIN2B	DD	https://doi.org/10.1038/s41586-020-2832-5		12	56168131	T	C	SMARCC2	NDD	https://doi.org/10.1016/j.cell.2019.12.036;https://doi.org/10.1093/nar/gkw865
16	8901144	A	T	USP7	DD	https://doi.org/10.1038/s41586-020-2832-5		12	56171868	A	G	SMARCC2	NDD	https://doi.org/10.1016/j.cell.2019.12.036;https://doi.org/10.1093/nar/gkw865
20	49374964	A	C	KCNB1	DD	https://doi.org/10.1038/s41586-020-2832-5		12	56323884	G	T	PAN2	NDD	https://doi.org/10.1093/nar/gkw865
7	140754190	T	C	BRAF	DD	https://doi.org/10.1038/s41586-020-2832-5		12	56327388	G	A	PAN2	NDD	https://doi.org/10.1093/nar/gkw865
12	112450352	A	G	PTPN11	DD	https://doi.org/10.1038/s41586-020-2832-5		12	57569266	T	C	KIF5A	NDD	https://doi.org/10.1093/nar/gkw865
9	137162660	C	T	GRIN1	DD	https://doi.org/10.1038/s41586-020-2832-5		12	57576344	A	G	KIF5A	NDD	https://doi.org/10.1093/nar/gkw865
1	151407006	C	T	POGZ	DD	https://doi.org/10.1038/s41586-020-2832-5		12	57627831	C	A	B4GALNT1	NDD	https://doi.org/10.1016/j.cell.2019.12.036;https://doi.org/10.1093/nar/gkw865
1	11114371	G	T	MTOR	DD	https://doi.org/10.1038/s41586-020-2832-5		12	79296181	C	G	SYT1	NDD	https://doi.org/10.1093/nar/gkw865
10	129958937	C	A	EBF3	DD	https://doi.org/10.1038/s41586-020-2832-5		12	79296219	G	A	SYT1	NDD	https://doi.org/10.1016/j.cell.2019.12.036;https://doi.org/10.1093/nar/gkw865
1	11997300	G	A	MFN2	DD	https://doi.org/10.1038/s41586-020-2832-5		12	79353598	A	G	SYT1	NDD	https://doi.org/10.1016/j.cell.2019.12.036;https://doi.org/10.1093/nar/gkw865
[truncated: 3,088 more rows]

## Sheet: Supplementary Table 9
#Supplementary Table 9. Benchmarking results of 53 tools evaulated on the DD data.
[truncated: 54 more rows]

[truncated: 19 more sheets: Supplementary Table 10, Supplementary Table 11, Supplementary Table 12, Supplementary Table 13, Supplementary Table 14, Supplementary Table 15, Supplementary Table 16, Supplementary Table 17, Supplementary Table 18, Supplementary Table 19, Supplementary Table 20, Supplementary Table 21, Supplementary Table 22, Supplementary Table 23, Supplementary Table 24, Supplementary Table 25, Supplementary Table 26, Supplementary Table 27, Supplementary Table 28]
